# Supplementary material
Source: PubMed Central journal article supplement (PMC4762877)
Supplement: NIHMS752506-supplement-SI.pdf [file NIHMS752506-supplement-SI.pdf]

Structure–Reactivity Relationships in Lithiated Evans Enolates:  
Influence of Aggregation and Solvation on the  
Stereochemistry and Mechanism of Aldol Additions

Evan H. Tallmadge, Janis Jermaks, and David B. Collum\*

Department of Chemistry and Chemical Biology  
Baker Laboratory, Cornell University  
Ithaca, New York 14853-1301  
E-mail: dbc6@cornell.edu

|                 |            |      |
|-----------------|------------|------|
| <b>Chart 1.</b> | Substrates | S-13 |
|-----------------|------------|------|

**Part 1: Aldol Products**

---

|                   |                                                                                                                               |      |
|-------------------|-------------------------------------------------------------------------------------------------------------------------------|------|
| <b>Figure 1.</b>  | $^1\text{H}$ NMR spectrum of <b>5</b>                                                                                         | S-14 |
| <b>Figure 2.</b>  | $^{13}\text{C}$ NMR spectrum of <b>5</b>                                                                                      | S-15 |
| <b>Figure 3.</b>  | $^1\text{H}$ NMR spectrum of ( <i>R,S</i> )- <b>6</b> aldol product                                                           | S-16 |
| <b>Figure 4.</b>  | $^{13}\text{C}$ NMR spectrum of ( <i>R,S</i> )- <b>6</b> aldol product                                                        | S-17 |
| <b>Figure 5.</b>  | $^1\text{H}$ NMR spectrum of ( <i>S,R</i> )- <b>6</b> aldol product                                                           | S-18 |
| <b>Figure 6.</b>  | $^{13}\text{C}$ NMR spectrum of ( <i>S,R</i> )- <b>6</b> aldol product                                                        | S-19 |
| <b>Figure 7.</b>  | $^1\text{H}$ NMR spectrum of ( <i>R,R</i> )- <b>6</b> aldol product                                                           | S-20 |
| <b>Figure 8.</b>  | $^{13}\text{C}$ NMR spectrum of ( <i>R,R</i> )- <b>6</b> aldol product                                                        | S-21 |
| <b>Figure 9.</b>  | $^1\text{H}$ NMR spectrum of ( <i>S,S</i> )- <b>6</b> aldol product                                                           | S-22 |
| <b>Figure 10.</b> | $^{13}\text{C}$ NMR spectrum of ( <i>S,S</i> )- <b>6</b> aldol product                                                        | S-23 |
| <b>Figure 11.</b> | $^1\text{H}$ NMR spectrum of four isolated aldol products                                                                     | S-24 |
| <b>Figure 12.</b> | X-ray crystallographic Ortep of recrystallized ( <i>R,S</i> )- <b>6</b> aldol product                                         | S-25 |
| <b>Table 1.</b>   | Crystal data and structural refinement of recrystallized ( <i>R,S</i> )- <b>6</b> aldol product                               | S-26 |
| <b>Table 2.</b>   | Atomic coordinates and equivalent isotropic displacement parameters of recrystallized ( <i>R,S</i> )- <b>6</b> aldol product. | S-27 |

|                   |                               |      |
|-------------------|-------------------------------|------|
| <b>Figure 13.</b> | Synthesis of ( <i>S,S</i> )-6 | S-28 |
|-------------------|-------------------------------|------|

### Part 2: Order of Aldehyde Addition

---

|                   |                                                                                                                                                             |      |
|-------------------|-------------------------------------------------------------------------------------------------------------------------------------------------------------|------|
| <b>Figure 14.</b> | <sup>1</sup> H NMR spectrum of the aldol reaction between <b>5</b> and isobutyraldehyde                                                                     | S-32 |
| <b>Figure 15.</b> | <sup>1</sup> H NMR spectrum the aldol reaction between <b>5</b> and isobutyraldehyde, mixing LDA with the aldehyde before the addition of the oxazolidinone | S-33 |
| <b>Figure 16.</b> | <sup>6</sup> Li NMR spectra of changing aldehyde equivalents with LDA                                                                                       | S-34 |
| <b>Figure 17.</b> | <sup>6</sup> Li NMR spectra of add 0.50 equiv aldehyde to LDA, then the oxazolidinone of <b>5</b> , then more aldehyde                                      | S-35 |

### Part 3: Finding the Reactive Species of Enolate **5**

---

|                   |                                                                                                      |      |
|-------------------|------------------------------------------------------------------------------------------------------|------|
| <b>Figure 18.</b> | <sup>6</sup> Li NMR spectrum of equilibrated enolate <b>5</b>                                        | S-36 |
| <b>Figure 19.</b> | <sup>6</sup> Li NMR spectra of <b>5</b> aging at -60 °C                                              | S-37 |
| <b>Figure 20.</b> | <sup>6</sup> Li NMR spectra of <b>5</b> aging at -78 °C                                              | S-38 |
| <b>Figure 21.</b> | <sup>6</sup> Li NMR spectra of sequential addition of the precursor oxazolidinone of <b>5</b> to LDA | S-39 |
| <b>Figure 22.</b> | <sup>6</sup> Li NMR spectrum of ( <i>R,S</i> )-6                                                     | S-40 |
| <b>Figure 23.</b> | <sup>6</sup> Li NMR spectra of addition of isobutyraldehyde to equilibrated <b>5</b>                 | S-41 |
| <b>Figure 24.</b> | <sup>6</sup> Li NMR spectra of addition of LDA to equilibrated <b>5</b>                              | S-42 |
| <b>Figure 25.</b> | Percent conversion on aging in neat THF                                                              | S-43 |
| <b>Figure 26.</b> | Percent conversion on aging in low THF                                                               | S-44 |
| <b>Figure 27.</b> | Equivalents of aldehyde on an unaged sample                                                          | S-45 |
| <b>Figure 28.</b> | Equivalents of aldehyde on an aged sample                                                            | S-46 |

|                   |                                                 |      |
|-------------------|-------------------------------------------------|------|
| <b>Figure 29.</b> | Percent conversion aged vs. equiv LDA           | S-47 |
| <b>Figure 30.</b> | Kinetic formation of mixed dimer                | S-48 |
| <b>Figure 31.</b> | Selectivity from kinetically formed mixed dimer | S-49 |

#### Part 4: Ketone Aldol Kinetics

---

|                   |                                                                                                                     |      |
|-------------------|---------------------------------------------------------------------------------------------------------------------|------|
| <b>Figure 32.</b> | <sup>1</sup> H NMR spectrum of aldol with cyclohexanone                                                             | S-50 |
| <b>Figure 33.</b> | <sup>1</sup> H NMR spectrum of recrystallized ( <i>R</i> )-7                                                        | S-51 |
| <b>Figure 34.</b> | <sup>13</sup> C NMR spectrum of ( <i>R</i> )-7                                                                      | S-52 |
| <b>Figure 35.</b> | X-ray crystallographic Ortep of recrystallized ( <i>R</i> )-7 aldol product                                         | S-53 |
| <b>Table 3.</b>   | Crystal data and structural refinement of recrystallized ( <i>R</i> )-7 aldol product                               | S-54 |
| <b>Table 4.</b>   | Atomic coordinates and equivalent isotropic displacement parameters of recrystallized ( <i>R</i> )-7 aldol product. | S-55 |
| <b>Figure 36.</b> | Plot of initial rate vs. [cyclohexanone]                                                                            | S-56 |
| <b>Figure 37.</b> | Plot of initial rate vs. [5]                                                                                        | S-57 |
| <b>Figure 38.</b> | Plot of initial rate vs. [THF]                                                                                      | S-58 |
| <b>Figure 39.</b> | Plot of initial rate vs. [5] of a sample containing only tetramer                                                   | S-59 |

#### Part 5: Computations Overview of Enolate 5

---

|                   |                                                               |      |
|-------------------|---------------------------------------------------------------|------|
| <b>Figure 40.</b> | Computational overview of ground states                       | S-60 |
| <b>Figure 41.</b> | Computational overview of monomer transition states           | S-61 |
| <b>Figure 42.</b> | Computational overview of dimer transitions states            | S-62 |
| <b>Figure 43.</b> | Computational overview of spirocyclic dimer transition states | S-63 |

|                   |                                                                            |      |
|-------------------|----------------------------------------------------------------------------|------|
| <b>Figure 44.</b> | Computational overview of tetramer transition states                       | S-64 |
| <b>Figure 45.</b> | Computational overview of LDA 5 mixed dimer transition states              | S-65 |
| <b>Figure 46.</b> | Computational overview of all transition states leading to $(R,S)$ -6      | S-66 |
| <b>Figure 47.</b> | Computational overview of the pathway from monomer to $(R,S)$ -6           | S-67 |
| <b>Figure 48.</b> | Computational overview of the pathway from monomer to $(S,R)$ -6           | S-68 |
| <b>Figure 49.</b> | Computational overview of the pathway from monomer to $(R,R)$ -6           | S-69 |
| <b>Figure 50.</b> | Computational overview of the pathway from monomer to $(S,S)$ -6           | S-70 |
| <b>Figure 51.</b> | Computational overview of the pathway from dimer to $(R,S)$ -6             | S-71 |
| <b>Figure 52.</b> | Computational overview of the pathway from dimer to $(S,R)$ -6             | S-72 |
| <b>Figure 53.</b> | Computational overview of the pathway from dimer to $(R,R)$ -6             | S-73 |
| <b>Figure 54.</b> | Computational overview of the pathway from dimer to $(S,S)$ -6             | S-74 |
| <b>Figure 55.</b> | Computational overview of the pathway from spirocyclic dimer to $(R,S)$ -6 | S-75 |
| <b>Figure 56.</b> | Computational overview of the pathway from spirocyclic dimer to $(S,R)$ -6 | S-76 |
| <b>Figure 57.</b> | Computational overview of the pathway from spirocyclic dimer to $(R,R)$ -6 | S-77 |
| <b>Figure 58.</b> | Computational overview of the pathway from spirocyclic dimer to $(S,S)$ -6 | S-78 |
| <b>Figure 59.</b> | Computational overview of the pathway from tetramer to $(R,S)$ -6          | S-79 |

|                   |                                                                         |      |
|-------------------|-------------------------------------------------------------------------|------|
| <b>Figure 60.</b> | Computational overview of the pathway from tetramer to (S,R)-6          | S-80 |
| <b>Figure 61.</b> | Computational overview of the pathway from tetramer to (R,R)-6          | S-81 |
| <b>Figure 62.</b> | Computational overview of the pathway from tetramer to (S,S)-6          | S-82 |
| <b>Figure 63.</b> | Computational overview of the pathway from LDA 5 mixed dimer to (R,S)-6 | S-83 |
| <b>Figure 64.</b> | Computational overview of the pathway from LDA 5 mixed dimer to (S,R)-6 | S-84 |
| <b>Figure 65.</b> | Computational overview of the pathway from LDA 5 mixed dimer to (R,R)-6 | S-85 |
| <b>Figure 66.</b> | Computational overview of the pathway from LDA 5 mixed dimer to (S,S)-6 | S-86 |

## Part 6: General Computations

---

|                  |                                                                                                   |      |
|------------------|---------------------------------------------------------------------------------------------------|------|
| <b>Table 5.</b>  | Geometric coordinates and thermally corrected MP2 energies for THF                                | S-87 |
| <b>Table 6.</b>  | Geometric coordinates and thermally corrected MP2 energies for isobutyraldehyde                   | S-88 |
| <b>Table 7.</b>  | Geometric coordinates and thermally corrected MP2 energies for cyclohexanone                      | S-89 |
| <b>Table 8.</b>  | Geometric coordinates and thermally corrected MP2 energies for LDA with two THF                   | S-90 |
| <b>Table 9.</b>  | Geometric coordinates and thermally corrected MP2 energies for 5 monomer with three THF           | S-92 |
| <b>Table 10.</b> | Geometric coordinates and thermally corrected MP2 energies for 5 dimer with three THF             | S-94 |
| <b>Table 11.</b> | Geometric coordinates and thermally corrected MP2 energies for 5 spirocyclic dimer with three THF | S-96 |

|                  |                                                                                                        |       |
|------------------|--------------------------------------------------------------------------------------------------------|-------|
| <b>Table 12.</b> | Geometric coordinates and thermally corrected MP2 energies for <b>5</b> $D_{2d}$ tetramer              | S-98  |
| <b>Table 13.</b> | Geometric coordinates and thermally corrected MP2 energies for LDA <b>5</b> mixed dimer with three THF | S-100 |

### Part 7: 5 Transition State Computations

---

|                  |                                                                                                                                                                                           |       |
|------------------|-------------------------------------------------------------------------------------------------------------------------------------------------------------------------------------------|-------|
| <b>Table 14.</b> | Geometric coordinates and thermally corrected MP2 energies for the transition state leading to $(R,S)$ - <b>6</b> from <b>5</b> monomer with three THF                                    | S-102 |
| <b>Table 15.</b> | Geometric coordinates and thermally corrected MP2 energies for the transition state leading to $(S,R)$ - <b>6</b> from <b>5</b> monomer with three THF                                    | S-104 |
| <b>Table 16.</b> | Geometric coordinates and thermally corrected MP2 energies for the transition state leading to $(R,R)$ - <b>6</b> from <b>5</b> monomer with three THF                                    | S-106 |
| <b>Table 17.</b> | Geometric coordinates and thermally corrected MP2 energies for the transition state leading to $(S,S)$ - <b>6</b> from <b>5</b> monomer with three THF                                    | S-108 |
| <b>Table 18.</b> | Geometric coordinates and thermally corrected MP2 energies for the transition state leading to $(R,S)$ - <b>6</b> from <b>5</b> monomer with three THF with 3 THF in the transition state | S-110 |
| <b>Table 19.</b> | Geometric coordinates and thermally corrected MP2 energies for the transition state leading to $(R,S)$ - <b>6</b> from <b>5</b> dimer with three THF                                      | S-112 |
| <b>Table 20.</b> | Geometric coordinates and thermally corrected MP2 energies for the transition state leading to $(S,R)$ - <b>6</b> from <b>5</b> dimer with three THF                                      | S-114 |

|                  |                                                                                                                                                |       |
|------------------|------------------------------------------------------------------------------------------------------------------------------------------------|-------|
| <b>Table 21.</b> | Geometric coordinates and thermally corrected MP2 energies for the transition state leading to (R,R)-6 from 5 dimer with three THF             | S-116 |
| <b>Table 22.</b> | Geometric coordinates and thermally corrected MP2 energies for the transition state leading to (S,S)-6 from 5 dimer with three THF             | S-118 |
| <b>Table 23.</b> | Geometric coordinates and thermally corrected MP2 energies for the transition state leading to (R,S)-6 from 5 spirocyclic dimer with three THF | S-120 |
| <b>Table 24.</b> | Geometric coordinates and thermally corrected MP2 energies for the transition state leading to (S,R)-6 from 5 spirocyclic dimer with three THF | S-122 |
| <b>Table 25.</b> | Geometric coordinates and thermally corrected MP2 energies for the transition state leading to (R,R)-6 from 5 spirocyclic dimer with three THF | S-124 |
| <b>Table 26.</b> | Geometric coordinates and thermally corrected MP2 energies for the transition state leading to (S,S)-6 from 5 spirocyclic dimer with three THF | S-126 |
| <b>Table 27.</b> | Geometric coordinates and thermally corrected MP2 energies for the transition state leading to (R,S)-6 from 5 D <sub>2d</sub> tetramer         | S-128 |
| <b>Table 28.</b> | Geometric coordinates and thermally corrected MP2 energies for the transition state leading to (S,R)-6 from 5 D <sub>2d</sub> tetramer         | S-130 |
| <b>Table 29.</b> | Geometric coordinates and thermally corrected MP2 energies for the transition state leading to (R,R)-6 from 5 D <sub>2d</sub> tetramer         | S-132 |
| <b>Table 30.</b> | Geometric coordinates and thermally corrected MP2 energies for the transition state leading to (S,S)-6 from 5 D <sub>2d</sub> tetramer         | S-134 |
| <b>Table 31.</b> | Geometric coordinates and thermally corrected MP2 energies for the transition state leading to (R,S)-6 from LDA 5 mixed dimer with three THF   | S-136 |

|                  |                                                                                                                                              |       |
|------------------|----------------------------------------------------------------------------------------------------------------------------------------------|-------|
| <b>Table 32.</b> | Geometric coordinates and thermally corrected MP2 energies for the transition state leading to (S,R)-6 from LDA 5 mixed dimer with three THF | S-138 |
| <b>Table 33.</b> | Geometric coordinates and thermally corrected MP2 energies for the transition state leading to (R,R)-6 from LDA 5 mixed dimer with three THF | S-140 |
| <b>Table 34.</b> | Geometric coordinates and thermally corrected MP2 energies for the transition state leading to (S,S)-6 from LDA 5 mixed dimer with three THF | S-142 |
| <b>Table 35.</b> | Geometric coordinates and thermally corrected MP2 energies for the transition state leading to (R)-7 from 5 monomer with three THF           | S-144 |
| <b>Table 36.</b> | Geometric coordinates and thermally corrected MP2 energies for the transition state leading to (S)-7 from 5 monomer with three THF           | S-146 |

#### Part 8: 5 IRC Computations

---

|                  |                                                                                                                                       |       |
|------------------|---------------------------------------------------------------------------------------------------------------------------------------|-------|
| <b>Table 37.</b> | Geometric coordinates and thermally corrected MP2 energies for IRC derived reactants leading to (R,S)-6 from 5 monomer with three THF | S-148 |
| <b>Table 38.</b> | Geometric coordinates and thermally corrected MP2 energies for IRC derived products leading to (R,S)-6 from 5 monomer with three THF  | S-150 |
| <b>Table 39.</b> | Geometric coordinates and thermally corrected MP2 energies for IRC derived reactants leading to (S,R)-6 from 5 monomer with three THF | S-152 |
| <b>Table 40.</b> | Geometric coordinates and thermally corrected MP2 energies for IRC derived products leading to (S,R)-6 from 5 monomer with three THF  | S-154 |



|                  |                                                                                                                                                               |       |
|------------------|---------------------------------------------------------------------------------------------------------------------------------------------------------------|-------|
| <b>Table 41.</b> | Geometric coordinates and thermally corrected MP2 energies for IRC derived reactants leading to ( <i>R,R</i> )- <b>6</b> from <b>5</b> monomer with three THF | S-156 |
| <b>Table 42.</b> | Geometric coordinates and thermally corrected MP2 energies for IRC derived products leading to ( <i>R,R</i> )- <b>6</b> from <b>5</b> monomer with three THF  | S-158 |
| <b>Table 43.</b> | Geometric coordinates and thermally corrected MP2 energies for IRC derived reactants leading to ( <i>S,S</i> )- <b>6</b> from <b>5</b> monomer with three THF | S-160 |
| <b>Table 44.</b> | Geometric coordinates and thermally corrected MP2 energies for IRC derived products leading to ( <i>S,S</i> )- <b>6</b> from <b>5</b> monomer with three THF  | S-162 |
| <b>Table 45.</b> | Geometric coordinates and thermally corrected MP2 energies for IRC derived reactants leading to ( <i>R,S</i> )- <b>6</b> from <b>5</b> dimer with three THF   | S-164 |
| <b>Table 46.</b> | Geometric coordinates and thermally corrected MP2 energies for IRC derived products leading to ( <i>R,S</i> )- <b>6</b> from <b>5</b> dimer with three THF    | S-166 |
| <b>Table 47.</b> | Geometric coordinates and thermally corrected MP2 energies for IRC derived reactants leading to ( <i>S,R</i> )- <b>6</b> from <b>5</b> dimer with three THF   | S-168 |
| <b>Table 48.</b> | Geometric coordinates and thermally corrected MP2 energies for IRC derived products leading to ( <i>S,R</i> )- <b>6</b> from <b>5</b> dimer with three THF    | S-170 |
| <b>Table 49.</b> | Geometric coordinates and thermally corrected MP2 energies for IRC derived reactants leading to ( <i>R,R</i> )- <b>6</b> from <b>5</b> dimer with three THF   | S-172 |

|                  |                                                                                                                                                         |       |
|------------------|---------------------------------------------------------------------------------------------------------------------------------------------------------|-------|
| <b>Table 50.</b> | Geometric coordinates and thermally corrected MP2 energies for IRC derived products leading to <i>(R,R)</i> -6 from 5 dimer with three THF              | S-174 |
| <b>Table 51.</b> | Geometric coordinates and thermally corrected MP2 energies for IRC derived reactants leading to <i>(S,S)</i> -6 from 5 dimer with three THF             | S-176 |
| <b>Table 52.</b> | Geometric coordinates and thermally corrected MP2 energies for IRC derived products leading to <i>(S,S)</i> -6 from 5 dimer with three THF              | S-178 |
| <b>Table 53.</b> | Geometric coordinates and thermally corrected MP2 energies for IRC derived reactants leading to <i>(R,S)</i> -6 from 5 spirocyclic dimer with three THF | S-180 |
| <b>Table 54.</b> | Geometric coordinates and thermally corrected MP2 energies for IRC derived products leading to <i>(R,S)</i> -6 from 5 spirocyclic dimer with three THF  | S-182 |
| <b>Table 55.</b> | Geometric coordinates and thermally corrected MP2 energies for IRC derived reactants leading to <i>(S,R)</i> -6 from 5 spirocyclic dimer with three THF | S-184 |
| <b>Table 56.</b> | Geometric coordinates and thermally corrected MP2 energies for IRC derived products leading to <i>(S,R)</i> -6 from 5 spirocyclic dimer with three THF  | S-186 |
| <b>Table 57.</b> | Geometric coordinates and thermally corrected MP2 energies for IRC derived reactants leading to <i>(R,R)</i> -6 from 5 spirocyclic dimer with three THF | S-188 |
| <b>Table 58.</b> | Geometric coordinates and thermally corrected MP2 energies for IRC derived products leading to <i>(R,R)</i> -6 from 5 spirocyclic dimer with three THF  | S-190 |

|                  |                                                                                                                                                 |       |
|------------------|-------------------------------------------------------------------------------------------------------------------------------------------------|-------|
| <b>Table 59.</b> | Geometric coordinates and thermally corrected MP2 energies for IRC derived reactants leading to (S,S)-6 from 5 spirocyclic dimer with three THF | S-192 |
| <b>Table 60.</b> | Geometric coordinates and thermally corrected MP2 energies for IRC derived products leading to (S,S)-6 from 5 spirocyclic dimer with three THF  | S-194 |
| <b>Table 61.</b> | Geometric coordinates and thermally corrected MP2 energies for IRC derived reactants leading to (R,S)-6 from 5 D <sub>2d</sub> tetramer         | S-196 |
| <b>Table 62.</b> | Geometric coordinates and thermally corrected MP2 energies for IRC derived products leading to (R,S)-6 from 5 D <sub>2d</sub> tetramer          | S-198 |
| <b>Table 63.</b> | Geometric coordinates and thermally corrected MP2 energies for IRC derived reactants leading to (S,R)-6 from 5 D <sub>2d</sub> tetramer         | S-200 |
| <b>Table 64.</b> | Geometric coordinates and thermally corrected MP2 energies for IRC derived products leading to (S,R)-6 from 5 D <sub>2d</sub> tetramer          | S-202 |
| <b>Table 65.</b> | Geometric coordinates and thermally corrected MP2 energies for IRC derived reactants leading to (R,R)-6 from 5 D <sub>2d</sub> tetramer         | S-204 |
| <b>Table 66.</b> | Geometric coordinates and thermally corrected MP2 energies for IRC derived products leading to (R,R)-6 from 5 D <sub>2d</sub> tetramer          | S-206 |
| <b>Table 67.</b> | Geometric coordinates and thermally corrected MP2 energies for IRC derived reactants leading to (S,S)-6 from 5 D <sub>2d</sub> tetramer         | S-208 |
| <b>Table 68.</b> | Geometric coordinates and thermally corrected MP2 energies for IRC derived products leading to (S,S)-6 from 5 D <sub>2d</sub> tetramer          | S-210 |
| <b>Table 69.</b> | Geometric coordinates and thermally                                                                                                             | S-212 |

corrected MP2 energies for IRC derived reactants leading to (R,S)-6 from LDA 5 mixed dimer with three THF

|                  |                                                                                                                                               |       |
|------------------|-----------------------------------------------------------------------------------------------------------------------------------------------|-------|
| <b>Table 70.</b> | Geometric coordinates and thermally corrected MP2 energies for IRC derived products leading to (R,S)-6 from LDA 5 mixed dimer with three THF  | S-214 |
| <b>Table 71.</b> | Geometric coordinates and thermally corrected MP2 energies for IRC derived reactants leading to (S,R)-6 from LDA 5 mixed dimer with three THF | S-216 |
| <b>Table 72.</b> | Geometric coordinates and thermally corrected MP2 energies for IRC derived products leading to (S,R)-6 from LDA 5 mixed dimer with three THF  | S-218 |
| <b>Table 73.</b> | Geometric coordinates and thermally corrected MP2 energies for IRC derived reactants leading to (R,R)-6 from LDA 5 mixed dimer with three THF | S-220 |
| <b>Table 74.</b> | Geometric coordinates and thermally corrected MP2 energies for IRC derived products leading to (R,R)-6 from LDA 5 mixed dimer with three THF  | S-222 |
| <b>Table 75.</b> | Geometric coordinates and thermally corrected MP2 energies for IRC derived reactants leading to (S,S)-6 from LDA 5 mixed dimer with three THF | S-224 |
| <b>Table 76.</b> | Geometric coordinates and thermally corrected MP2 energies for IRC derived products leading to (S,S)-6 from LDA 5 mixed dimer with three THF  | S-226 |

**Chart 1. Substrates**

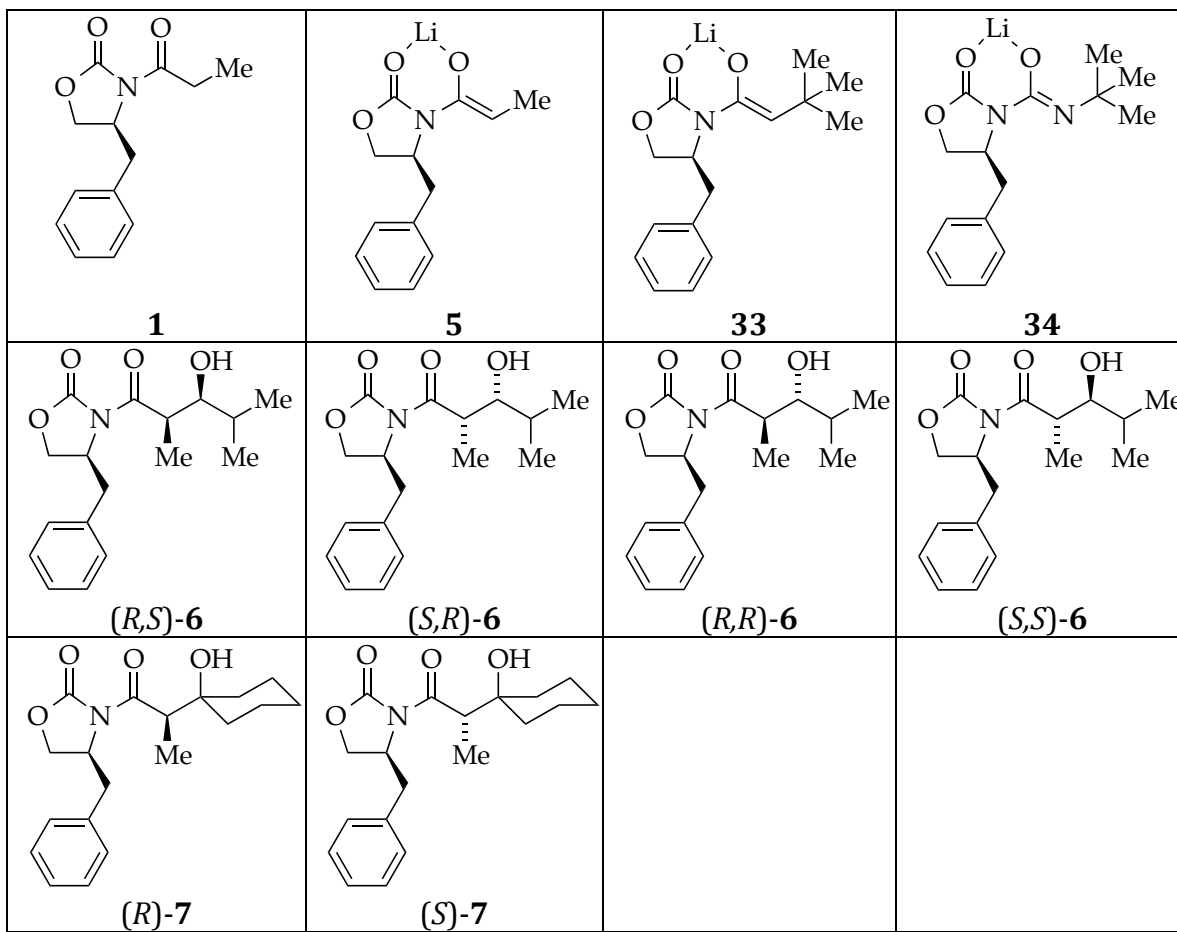

## Part 1: Aldol Products

---

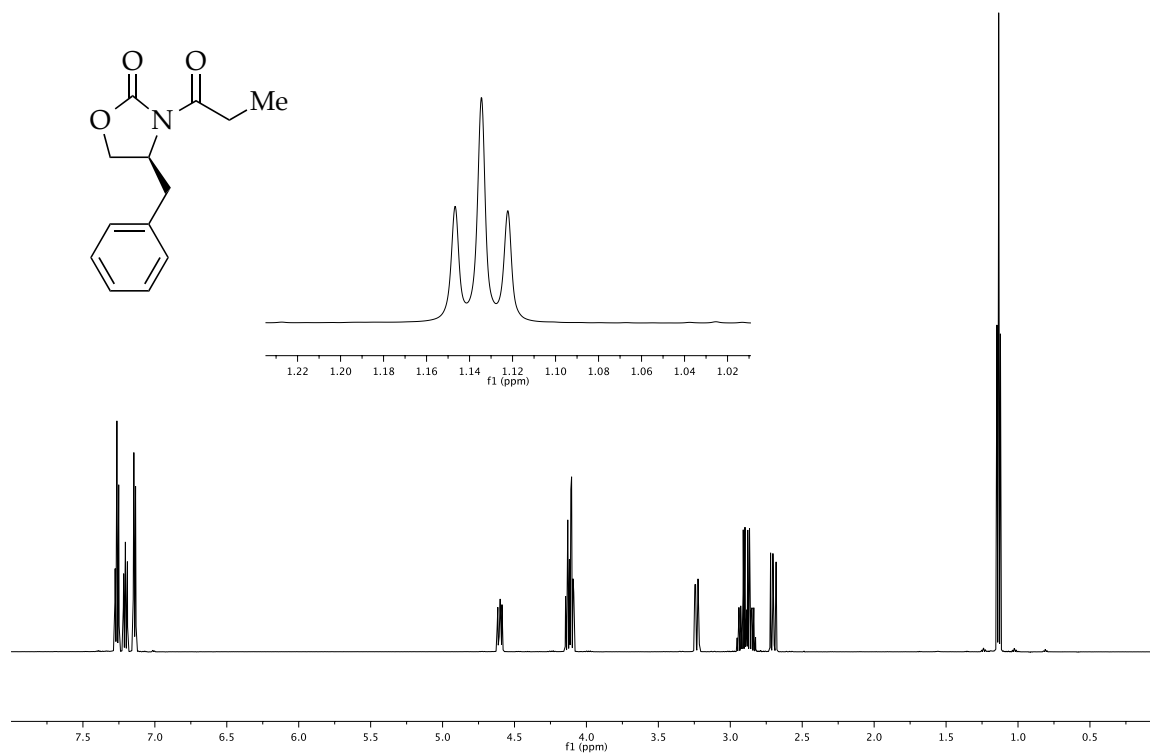

**Figure 1.**  $^1\text{H}$  NMR spectrum of the **1** in  $\text{CDCl}_3$  at  $23\text{ }^\circ\text{C}$ .

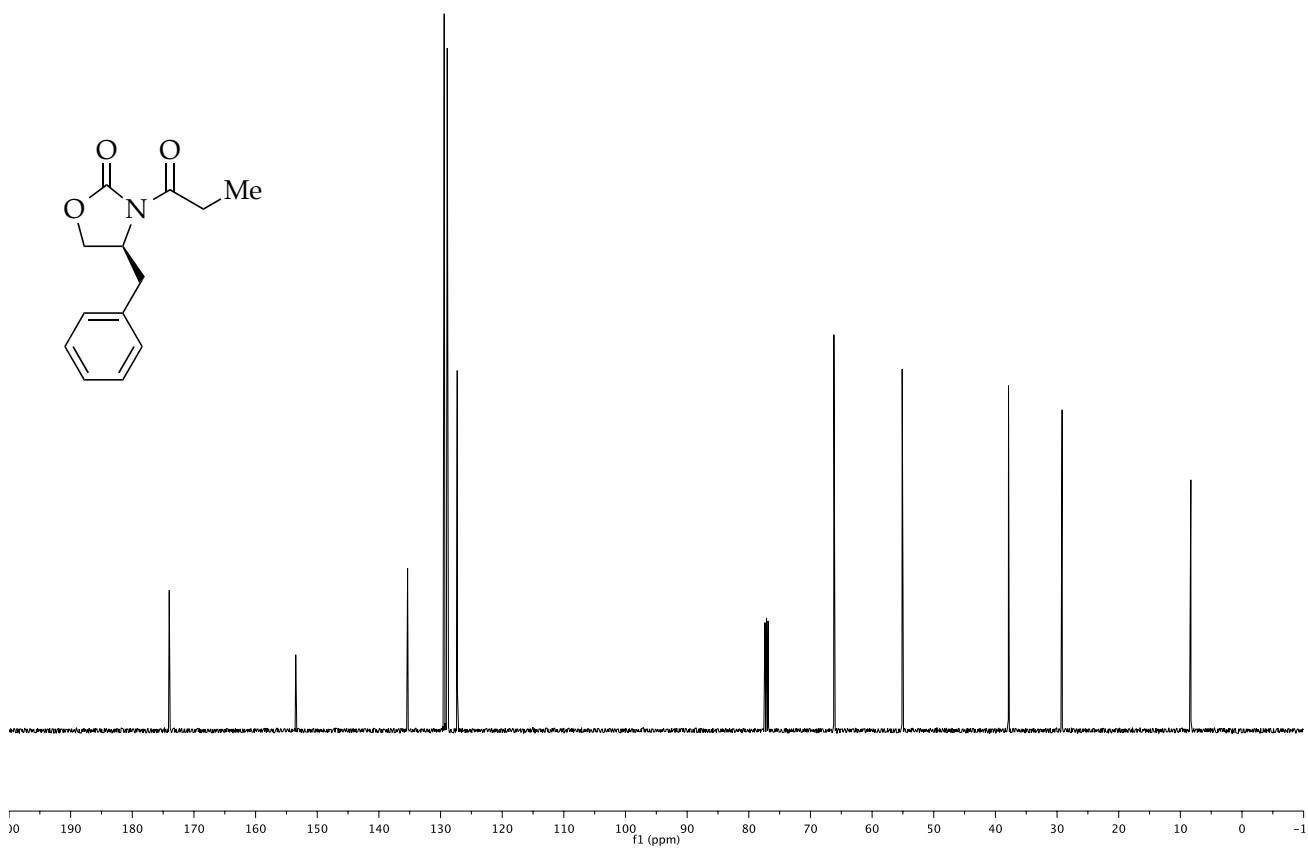

**Figure 2.** <sup>13</sup>C NMR spectrum of **1** in CDCl<sub>3</sub> at 23 °C.

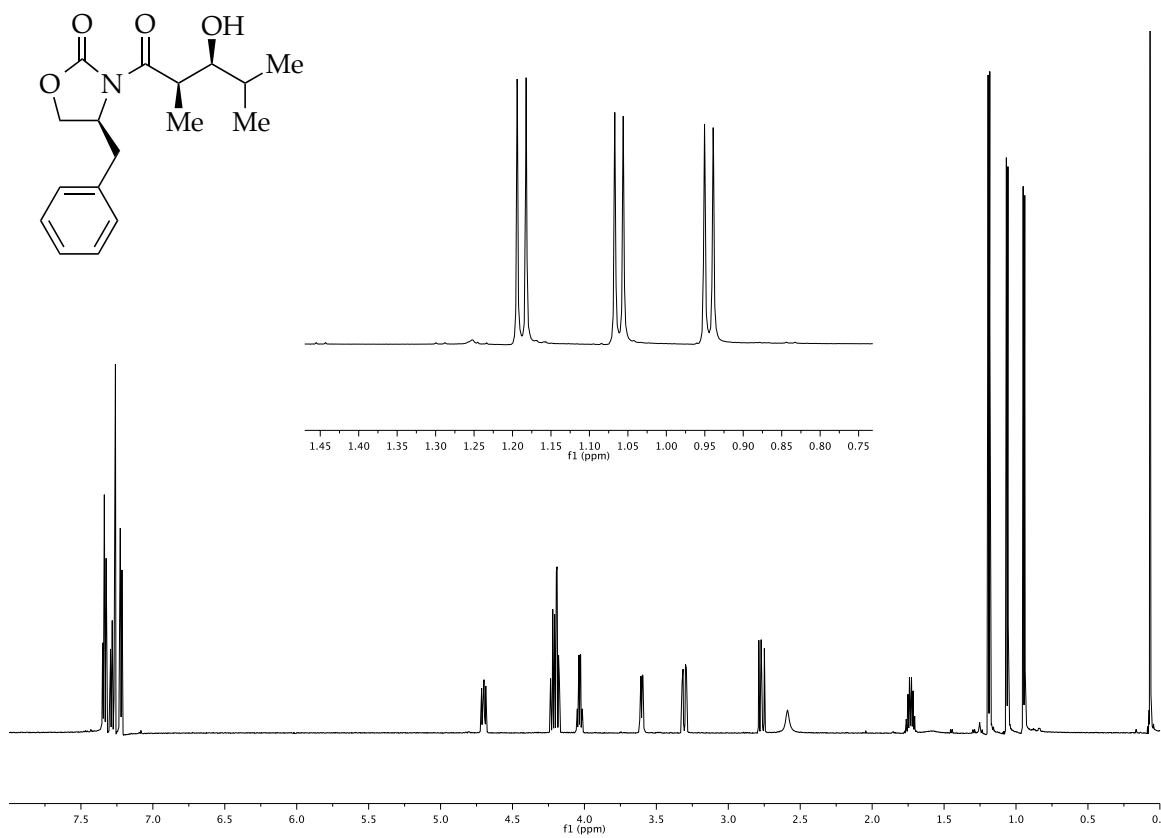

**Figure 3.** <sup>1</sup>H NMR spectrum of *(R,S)*-6 aldol product in CDCl<sub>3</sub> at 23 °C.



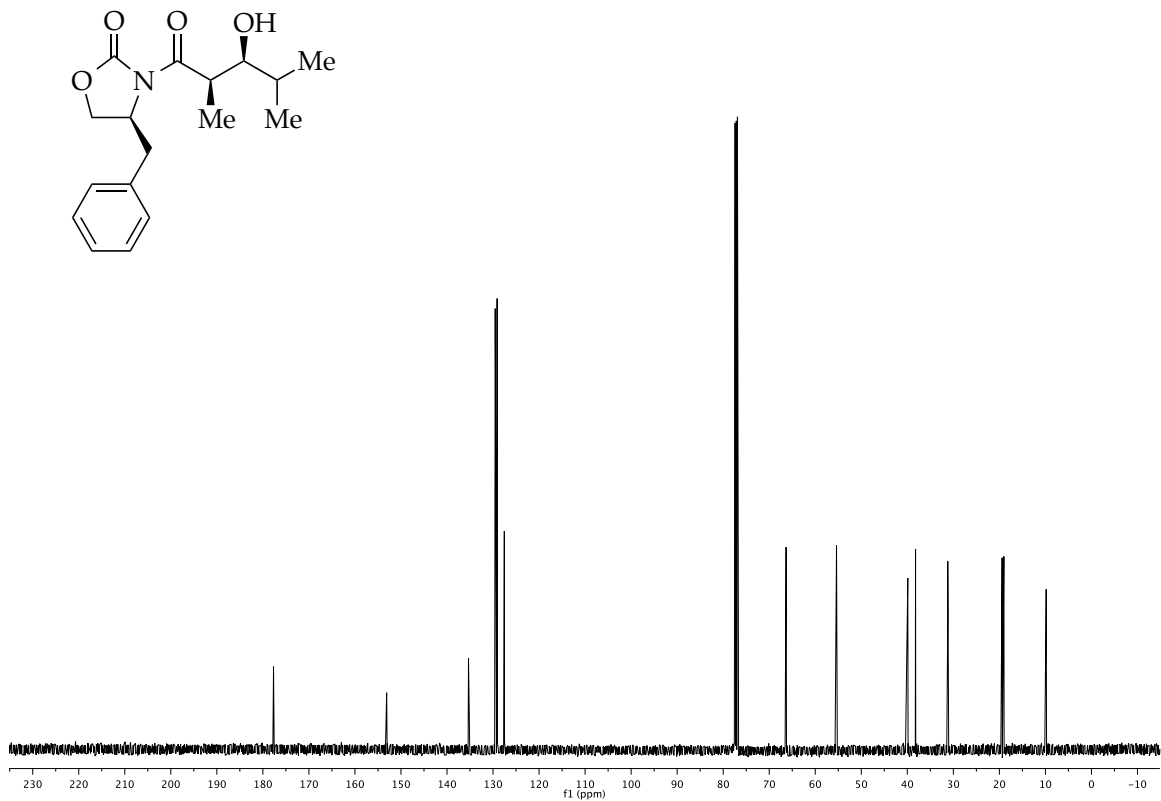

**Figure 4.** <sup>13</sup>C NMR spectrum of (*R,S*)-**6** aldol product in CDCl<sub>3</sub> at 23 °C.

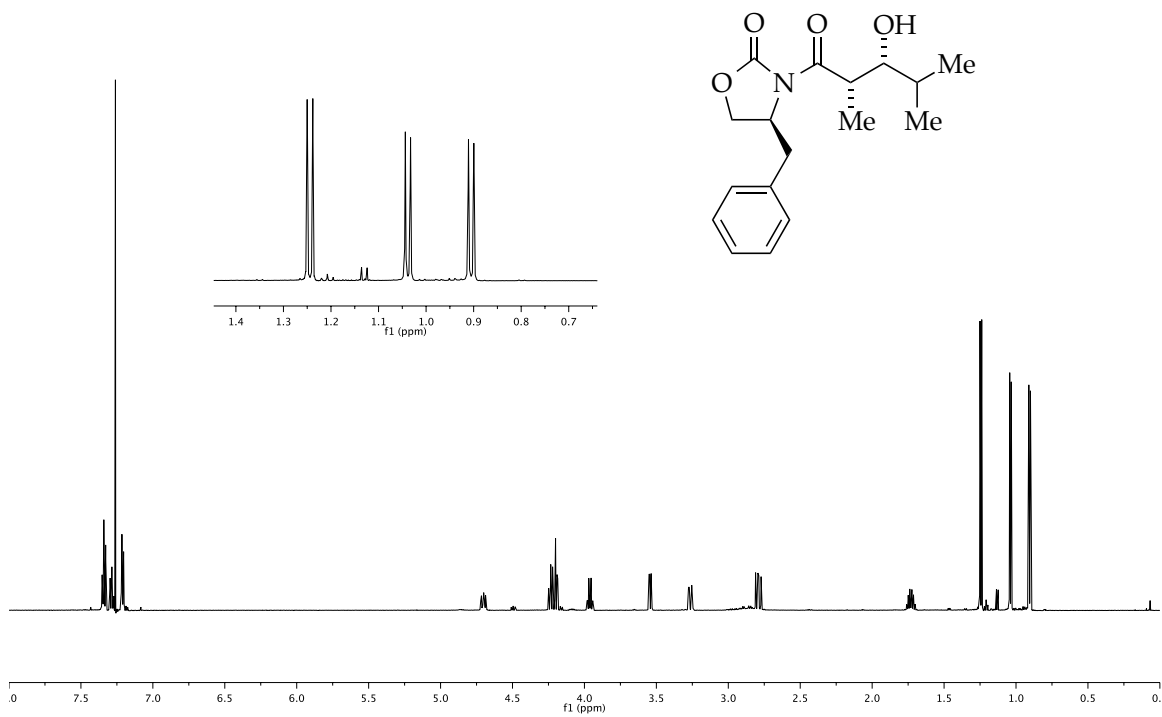

**Figure 5.**  $^1\text{H}$  NMR spectrum of  $(S,R)$ -6 aldol product in  $\text{CDCl}_3$  at  $23\text{ }^\circ\text{C}$ .

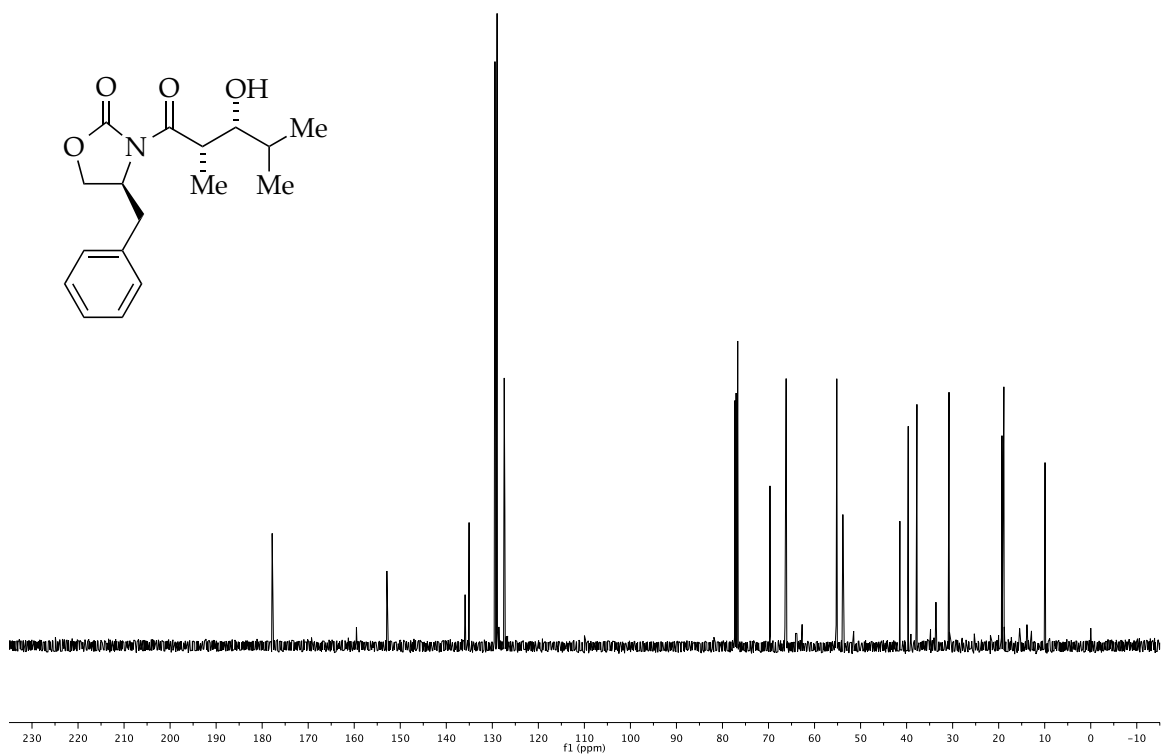

**Figure 6.** <sup>13</sup>C NMR spectrum of (*S,R*)-**6** aldol product in CDCl<sub>3</sub> at 23 °C.

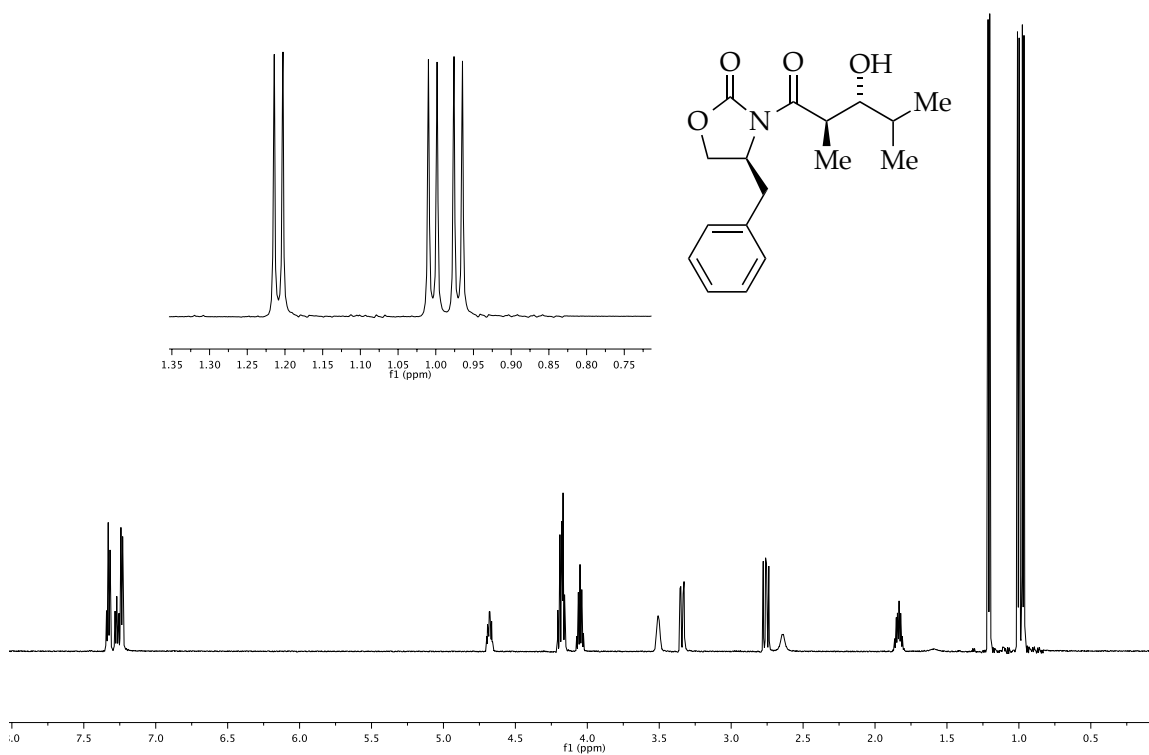

**Figure 7.**  $^1\text{H}$  NMR spectrum of  $(R,R)$ -6 aldol product in  $\text{CDCl}_3$  at 23 °C.

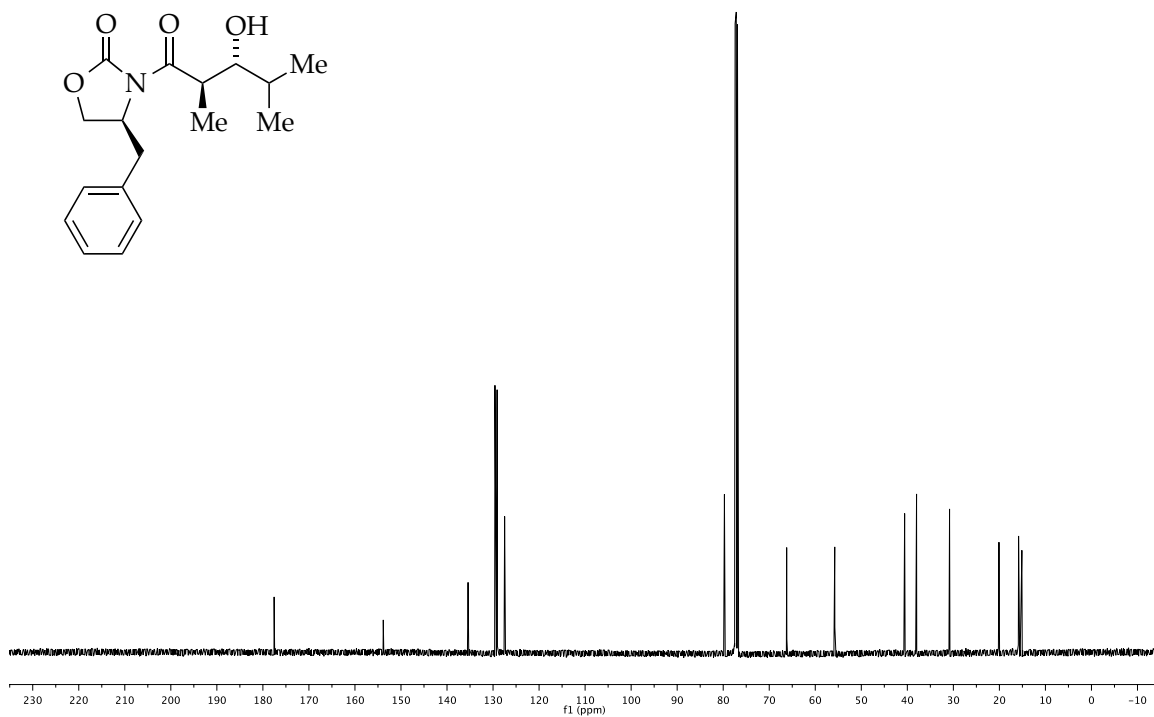

**Figure 8.** <sup>13</sup>C NMR spectrum of *(R,R)*-6 aldol product in CDCl<sub>3</sub> at 23 °C.

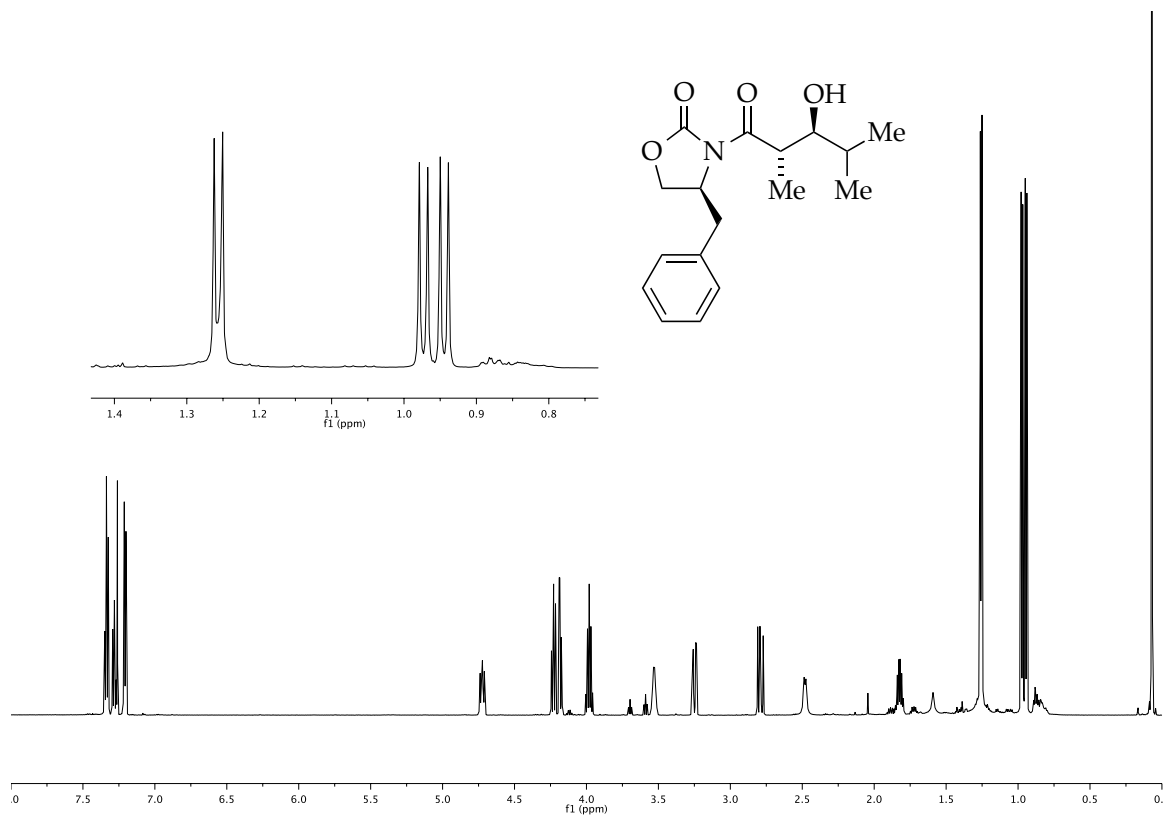

**Figure 9.**  $^1\text{H}$  NMR spectrum of *(S,S)*-6 aldol product in  $\text{CDCl}_3$  at 23 °C.

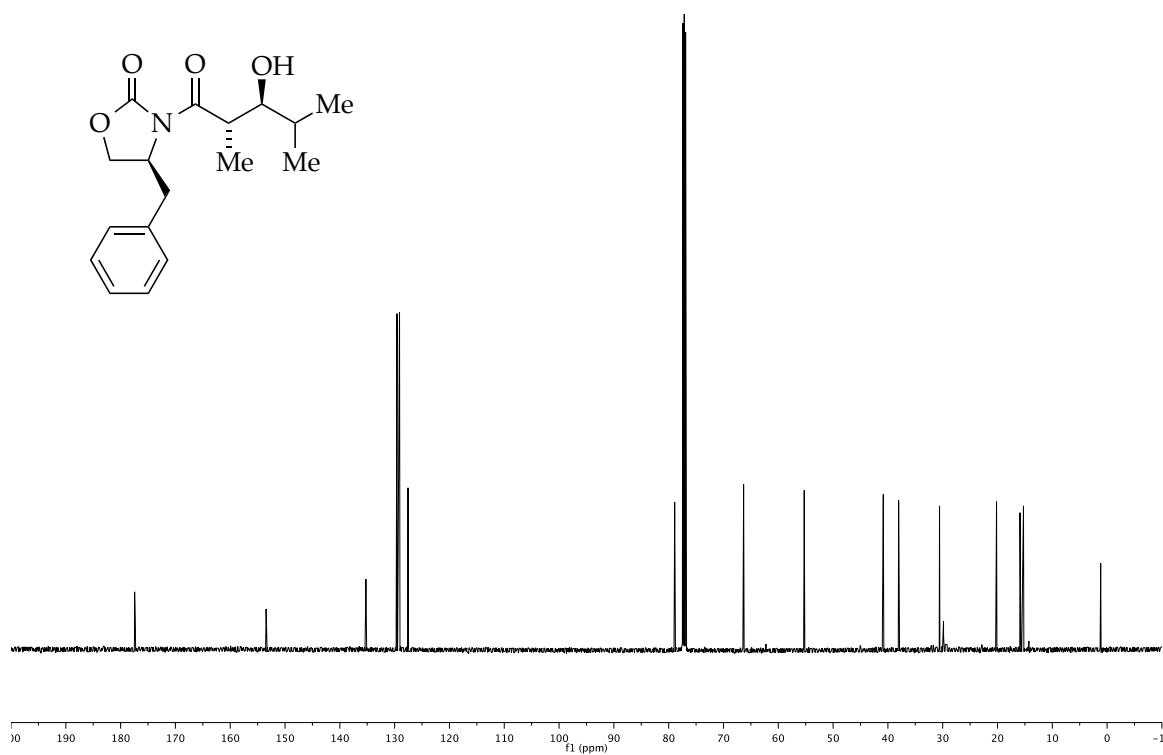

**Figure 10.** <sup>13</sup>C NMR spectrum of (*S,S*)-6 aldol product in CDCl<sub>3</sub> at 23 °C.

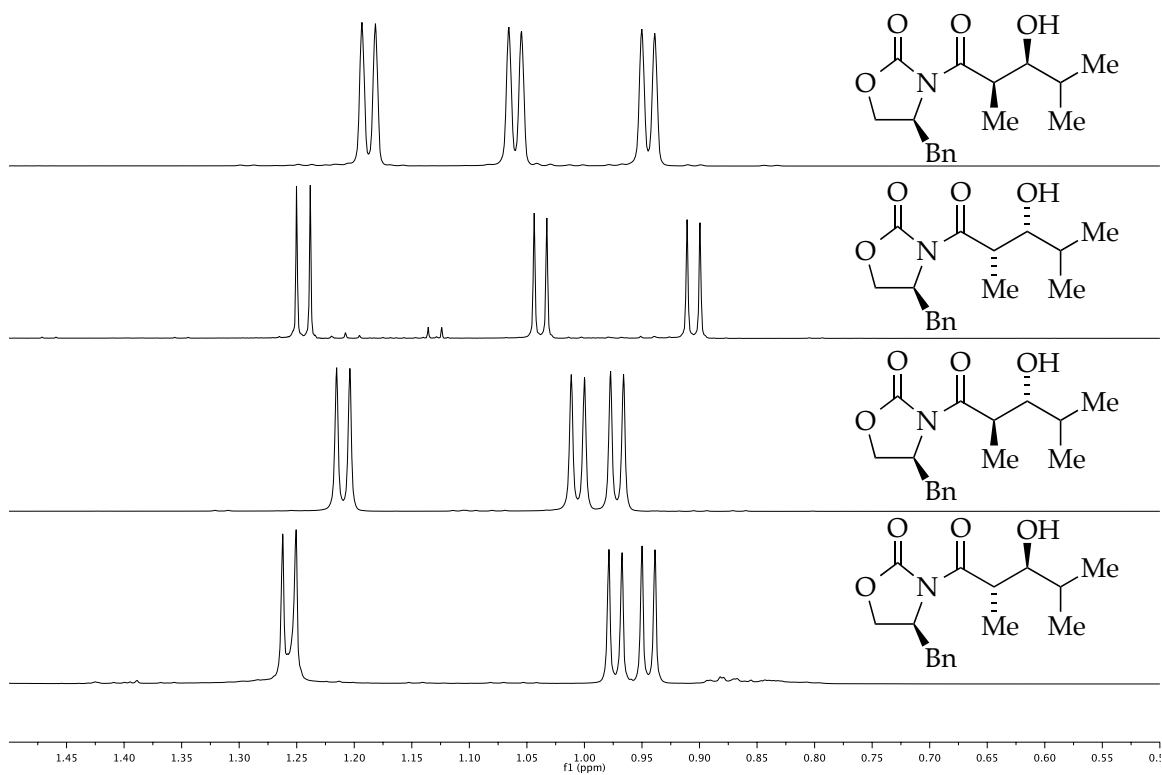

**Figure 11.**  $^1\text{H}$  NMR spectrum of (*R,S*)-**6**, (*S,R*)-**6**, (*R,R*)-**6**, and (*S,S*)-**6** aldol products in  $\text{CDCl}_3$  at 23  $^\circ\text{C}$ .



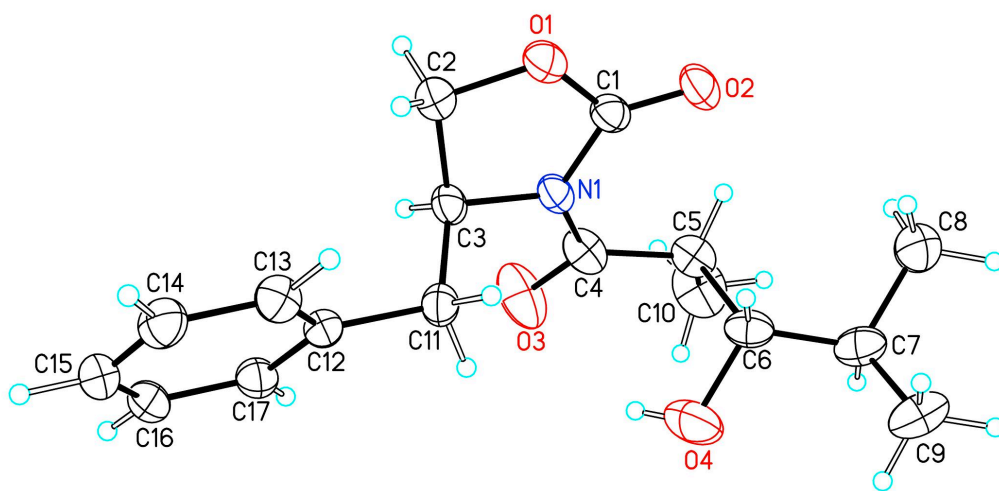

**Figure 12.** X-ray crystal structure of (*R,S*)-6.

**Table 1.** Crystal data and structural refinement of recrystallized (*R,S*)-6 aldol product

|                                   |                                             |                                |
|-----------------------------------|---------------------------------------------|--------------------------------|
| Empirical formula                 | C17 H23 N O4                                |                                |
| Formula weight                    | 305.36                                      |                                |
| Temperature                       | 203(2) K                                    |                                |
| Wavelength                        | 0.71073 Å                                   |                                |
| Crystal system                    | Monoclinic                                  |                                |
| Space group                       | P2(1)                                       |                                |
| Unit cell dimensions              | a = 11.4134(4)                              | Å $\alpha = 90^\circ$ .        |
|                                   | b = 6.2066(2)                               | Å $\beta = 103.613(2)^\circ$ . |
|                                   | c = 11.8551(4)                              | Å $\gamma = 90^\circ$ .        |
| Volume                            | 816.20(5) Å <sup>3</sup>                    |                                |
| Z                                 | 2                                           |                                |
| Density (calculated)              | 1.243 Mg/m <sup>3</sup>                     |                                |
| Absorption coefficient            | 0.088 mm <sup>-1</sup>                      |                                |
| F(000)                            | 328                                         |                                |
| Crystal size                      | 0.50 x 0.20 x 0.10 mm <sup>3</sup>          |                                |
| Theta range for data collection   | 1.77 to 29.13°.                             |                                |
| Index ranges                      | -14 ≤ h ≤ 15, -7 ≤ k ≤ 8, -16 ≤ l ≤ 13      |                                |
| Reflections collected             | 7975                                        |                                |
| Independent reflections           | 4023 [R(int) = 0.0222]                      |                                |
| Completeness to theta = 29.13°    | 99.2 %                                      |                                |
| Absorption correction             | Semi-empirical from equivalents             |                                |
| Max. and min. transmission        | 0.9912 and 0.9573                           |                                |
| Refinement method                 | Full-matrix least-squares on F <sup>2</sup> |                                |
| Data / restraints / parameters    | 4023 / 1 / 276                              |                                |
| Goodness-of-fit on F <sup>2</sup> | 1.002                                       |                                |
| Final R indices [I > 2σ(I)]       | R1 = 0.0379, wR2 = 0.0941                   |                                |
| R indices (all data)              | R1 = 0.0466, wR2 = 0.1012                   |                                |
| Absolute structure parameter      | 0.6(9)                                      |                                |
| Largest diff. peak and hole       | 0.166 and -0.173 e. Å <sup>-3</sup>         |                                |

**Table 2.** Atomic coordinates ( $\times 10^4$ ) and equivalent isotropic displacement parameters ( $\text{\AA}^2 \times 10^3$ ).  $U(\text{eq})$  is defined as one third of the trace of the orthogonalized  $U^{ij}$  tensor.

|       | x       | y       | z        | $U(\text{eq})$ |
|-------|---------|---------|----------|----------------|
| O(1)  | 4766(1) | 6317(2) | 5459(1)  | 45(1)          |
| O(2)  | 6528(1) | 5057(2) | 6463(1)  | 46(1)          |
| O(3)  | 4191(1) | 822(2)  | 7613(2)  | 68(1)          |
| O(4)  | 5655(1) | 3080(4) | 9782(1)  | 76(1)          |
| N(1)  | 4699(1) | 3764(2) | 6750(1)  | 33(1)          |
| C(1)  | 5448(1) | 5024(3) | 6256(1)  | 35(1)          |
| C(2)  | 3515(1) | 5669(4) | 5245(1)  | 49(1)          |
| C(3)  | 3429(1) | 4370(3) | 6304(1)  | 34(1)          |
| C(4)  | 4998(1) | 1993(2) | 7491(1)  | 41(1)          |
| C(5)  | 6295(1) | 1705(2) | 8148(1)  | 38(1)          |
| C(6)  | 6555(1) | 3363(3) | 9138(1)  | 41(1)          |
| C(7)  | 7817(2) | 3212(3) | 9932(1)  | 49(1)          |
| C(8)  | 8794(2) | 3249(5) | 9257(2)  | 64(1)          |
| C(9)  | 8036(2) | 5042(5) | 10813(2) | 66(1)          |
| C(10) | 6501(2) | -620(3) | 8565(2)  | 67(1)          |
| C(11) | 2983(1) | 5632(3) | 7228(1)  | 35(1)          |
| C(12) | 1646(1) | 6115(3) | 6861(1)  | 32(1)          |
| C(13) | 1228(1) | 8089(3) | 6383(1)  | 39(1)          |
| C(14) | -2(1)   | 8524(3) | 6060(1)  | 45(1)          |
| C(15) | -819(1) | 6976(3) | 6212(1)  | 45(1)          |
| C(16) | -416(1) | 4992(3) | 6668(1)  | 44(1)          |
| C(17) | 812(1)  | 4568(3) | 6993(1)  | 38(1)          |

**Figure 13.** Synthesis of (*S,S*)-6

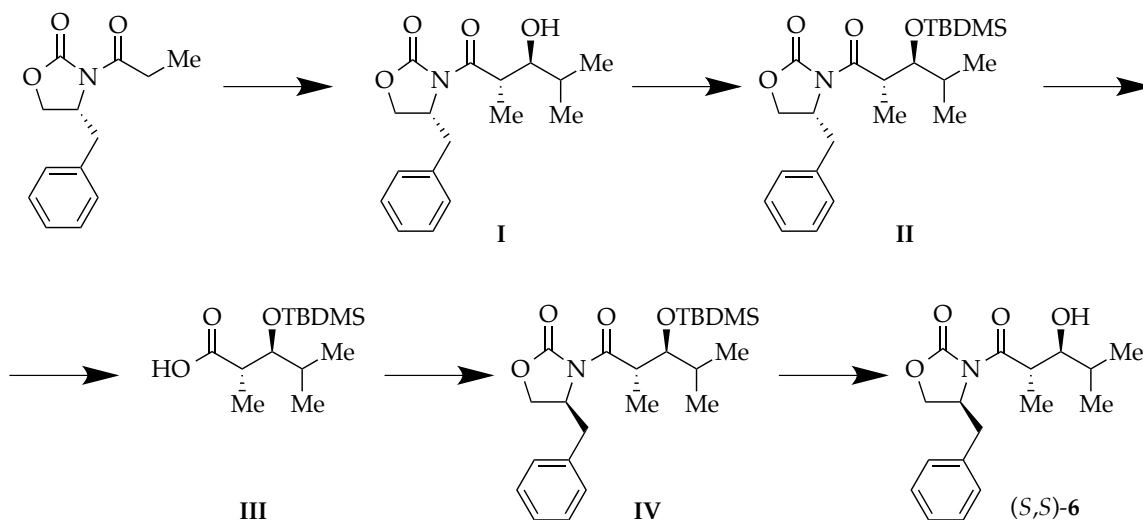

**(*R*)-4-benzyl-3-((2*S*,3*S*)-3-hydroxy-2,4-dimethylpentanoyl)oxazolidin-2-one (I).**

Following a procedure from Evans *et al.* (*JACS* **2001**, *123*, 10840) to a solution of titanium(IV) chloride (2.10 mL of 1.0 M solution in CH<sub>2</sub>Cl<sub>2</sub>, 2.10 mmol) at 0 °C was added titanium(IV) isopropoxide (215 μL, 0.706 mmol) in 9.4 mL CH<sub>2</sub>Cl<sub>2</sub>. After 5 min (*R*)-4-benzyl-3-propionyl-2-oxazolidinone (500 mg, 2.14 mmol) in 2.0 mL CH<sub>2</sub>Cl<sub>2</sub> was added. After 5 min diisopropylethylamine (500 μL, 2.83 mmol) was added, and the resulting deep red solution was stirred for 1 h at 0 °C to insure the complete conversion to the titanium enolate. In a separate flask, freshly distilled isobutyraldehyde (430 μL, 4.71 mmol) was added to a solution of diethylaluminum chloride (5.9 mL of 1 M solution in hexanes, 5.90 mmol) in 2.0 mL of CH<sub>2</sub>Cl<sub>2</sub> at -78 °C. After 15 min the enolate solution was cooled to -78 °C, and the aldehyde solution was added *via* cannula. After 1.5 h the reaction was quenched at -78 °C with 2.0 mL sat. aqueous NH<sub>4</sub>Cl. 40 mL of 3.0 M aqueous HCl was added to dissolve the aluminum salts. The aqueous layer was extracted three times with CH<sub>2</sub>Cl<sub>2</sub>. The combined layers were washed with sat. aqueous NaHCO<sub>3</sub>, dried over MgSO<sub>4</sub>, filtered, and concentrated. The product was

purified by flash chromatography (15% EtOAc/hexanes), affording 290 mg (44% yield) of a white crystalline solid showing spectral data as described in the main text.

**(R)-4-benzyl-3-((2S,3S)-3-((tert-butyldimethylsilyl)oxy)-2,4-dimethylpentanoyl)oxazolidin-2-one (II).** To a solution of I (250 mg, 0.82 mmol) in 3.5 mL freshly distilled THF at 0 °C was added freshly distilled 2,6-lutidine (114 µL, 0.98 mmol) and *tert*-butyldimethylsilyl trifluoromethanesulfonate (207 µL, 0.90 mmol). After 30 min at 0 °C the reaction was quenched by addition of 0.2 mL MeOH. After an additional 5 min the reaction was washed with a solution of NaHSO<sub>4</sub> (5.0 mL) and sat. aqueous NaHCO<sub>3</sub> (5 mL). The organic layer was dried over MgSO<sub>4</sub> and concentrated under reduced pressure. The product was purified by flash chromatography (10% EtOAc/hexanes) to provide affording 295 mg (86% yield) of product II as white crystalline solid. <sup>1</sup>H NMR (600 MHz; CDCl<sub>3</sub>): δ 7.34 (dd, *J* = 8.0, 6.7 Hz, 2H), 7.30 – 7.21 (m, 3H), 4.67 (ddt, *J* = 10.7, 7.1, 3.6 Hz, 1H), 4.17 – 4.10 (m, 2H), 4.09 – 4.01 (m, 2H), 3.44 (dd, *J* = 13.3, 3.5 Hz, 1H), 2.63 (dd, *J* = 13.2, 10.4 Hz, 1H), 1.81 (heptd, *J* = 6.9, 2.5 Hz, 1H), 1.16 (d, *J* = 6.7 Hz, 3H), 0.97 (d, *J* = 7.0 Hz, 3H), 0.95 (d, *J* = 6.7 Hz, 4H), 0.90 (s, 9H), 0.11 (s, 3H), 0.09 (s, 3H). <sup>13</sup>C NMR (151 MHz, CDCl<sub>3</sub>) δ 175.7, 153.2, 135.7, 129.5, 129.1, 127.4, 76.5, 66.1, 55.9, 43.9, 38.6, 31.3, 26.3, 20.9, 18.6, 16.9, 13.6, -3.8, -4.3. HRMS *m/z* calculated for C<sub>23</sub>H<sub>38</sub>NO<sub>4</sub>Si (M+H)<sup>+</sup> 420.25646, found 420.25482.

**(2S,3S)-3-((tert-butyldimethylsilyl)oxy)-2,4-dimethylpentanoic acid (III).** To a solution of II (200 mg, 0.48 mmol) in 6.0 mL of a 5:1 THF/water mixture was added 0.80 M aqueous LiOH (0.90 mL, 0.72 mmol) at 0 °C, followed by 30% aq.

H<sub>2</sub>O<sub>2</sub> (250 μL, 2.2 mmol), which was added dropwise. The reaction was monitored by TLC (*p*-anisaldehyde stain) and quenched after stirring the mixture 1 h at 0 °C. The reaction was quenched by addition of 1.33 M Na<sub>2</sub>SO<sub>3</sub> and saturated aqueous NH<sub>4</sub>Cl. The resulting mixture was extracted with ether and the combined organic extracts were dried over MgSO<sub>4</sub>. The concentrated mixture was purified by flash chromatography (CH<sub>2</sub>Cl<sub>2</sub> 90%, MeOH 10%). affording 45 mg (36%) of product **III** as a colorless oil. <sup>1</sup>H NMR (600 MHz, CDCl<sub>3</sub>) δ 11.09 (s, 1H), 3.69 (t, *J* = 4.4 Hz, 1H), 2.66 (qd, *J* = 7.3, 4.1 Hz, 1H), 1.85 (heptd, *J* = 6.9, 4.7 Hz, 1H), 1.23 (d, *J* = 7.3 Hz, 3H), 0.93-0.90 (m, 14H), 0.12 (s, 3H), 0.10 (s, 3H). <sup>13</sup>C NMR (151 MHz, CDCl<sub>3</sub>) δ 178.9, 79.7, 43.0, 32.6, 26.1, 18.4, 18.2, 15.5, -4.0, -4.3. HRMS *m/z* calcd for C<sub>13</sub>H<sub>29</sub>O<sub>3</sub>Si (M+H)<sup>+</sup> 261.18805, found 261.18793. HRMS *m/z* calculated for C<sub>13</sub>H<sub>27</sub>O<sub>3</sub>Si (M-H)<sup>-</sup> 259.17240, found 259.17311.

**(S)-4-benzyl-3-((2S,3S)-3-((tert-butyl)dimethylsilyloxy)-2,4-dimethylpentanoyl)oxazolidin-2-one (IV)**. To a solution of **III** (38 mg, 0.15 mmol) in 2.0 mL benzene was added DMF (34 μL, 0.44 mmol). Oxalyl chloride (39 μL, 45 mmol) was then added dropwise to the solution, and the reaction mixture was stirred for 2 h at room temperature. The solvent was then evaporated, and the resulting acid chloride was used directly in the next step. 1.6 M *n*-BuLi in hexanes (95 μL, 0.15 mmol) was added dropwise to a solution of (S)-4-benzyl-3-propionyloxazolidin-2-one (27 mg, 0.15 mmol) in 1.0 mL freshly distilled THF under inert atmosphere at -78 °C. A solution of the freshly prepared acid chloride in 0.50 mL THF was then added dropwise at -78 °C. The resulting mixture was stirred for 30 min at -78 °C and then allowed to warm to room temperature over 1 h. Following quenching with saturated aqueous NH<sub>4</sub>Cl

(1 mL) and water, the resulting mixture was extracted with EtOAc and the organic extracts were combined and dried over MgSO<sub>4</sub>. The concentrated mixture was purified by flash chromatography (10% EtOAc/hexanes), affording 34 mg (56% yield) of product **IV** as a white crystalline solid. <sup>1</sup>H NMR (500 MHz; CDCl<sub>3</sub>): δ 7.39 – 7.23 (m, 5H), 4.69 (ddd, *J* = 10.0, 6.7, 3.3 Hz, 1H), 4.24 – 4.08 (m, 3H), 3.99 (dd, *J* = 9.0, 1.8 Hz, 1H), 3.26 (dd, *J* = 13.4, 3.3 Hz, 1H), 2.81 (dd, *J* = 13.4, 9.5 Hz, 1H), 1.88 (heptd, *J* = 8.1, 7.0, 2.7 Hz, 1H), 1.16 (d, *J* = 6.9 Hz, 3H), 1.02 (d, *J* = 6.9 Hz, 3H), 0.94 (d, *J* = 6.8 Hz, 3H), 0.88 (s, 9H), 0.12 (s, 3H), 0.00 (s, 3H). <sup>13</sup>C NMR (126 MHz, CDCl<sub>3</sub>): δ 176.5, 153.0, 135.5, 129.6, 129.1, 127.5, 78.4, 65.9, 55.5, 42.4, 37.9, 30.6, 26.2, 20.5, 18.6, 15.4, 14.9, -4.1, -4.2. HRMS *m/z* calcd for C<sub>23</sub>H<sub>38</sub>NO<sub>4</sub>Si (M+H)<sup>+</sup> 420.25646, found 420.25576.

**(S)-4-benzyl-3-((2S,3S)-3-hydroxy-2,4-dimethylpentanoyl)oxazolidin-2-one**

**[(S,S)-6]** To a solution of **IV** (34 mg, 81 μmol) in 3 mL of THF was added 1.0 mL of concentrated HCl. The solution was stirred for 5 min. The resulting mixture was diluted with ether, extracted, and dried over MgSO<sub>4</sub>. The concentrated mixture was purified by flash chromatography (30% EtOAc/hexanes), affording 14 mg (57% yield) of **[(S,S)-6]** was obtained as a white crystalline solid. <sup>1</sup>H NMR (600 MHz; CDCl<sub>3</sub>): δ 7.36 – 7.26 (m, 3H), 7.22 – 7.19 (m, 2H), 4.72 (ddt, *J* = 9.3, 7.7, 3.1 Hz, 1H), 4.26 – 4.16 (m, 2H), 3.98 (p, *J* = 7.0 Hz, 1H), 3.53 (q, *J* = 6.2 Hz, 1H), 3.25 (dd, *J* = 13.4, 3.4 Hz, 1H), 2.79 (dd, *J* = 13.4, 9.4 Hz, 1H), 2.51 – 2.44 (m, 1H), 1.82 (pd, *J* = 6.8, 4.6 Hz, 1H), 1.26 (d, *J* = 6.9 Hz, 3H), 0.97 (d, *J* = 6.9 Hz, 3H), 0.94 (d, *J* = 6.8 Hz, 3H). <sup>13</sup>C NMR (126 MHz, CDCl<sub>3</sub>) δ 177.4, 153.5, 135.2, 129.6, 129.1, 127.6, 78.9, 66.3, 55.3, 40.8, 38.0, 30.6, 20.2, 15.9, 15.3. HRMS *m/z* calcd for C<sub>17</sub>H<sub>24</sub>NO<sub>4</sub> (M+H)<sup>+</sup> 306.16998, found 306.16913.

## Part 2: Order of Aldehyde Addition

---

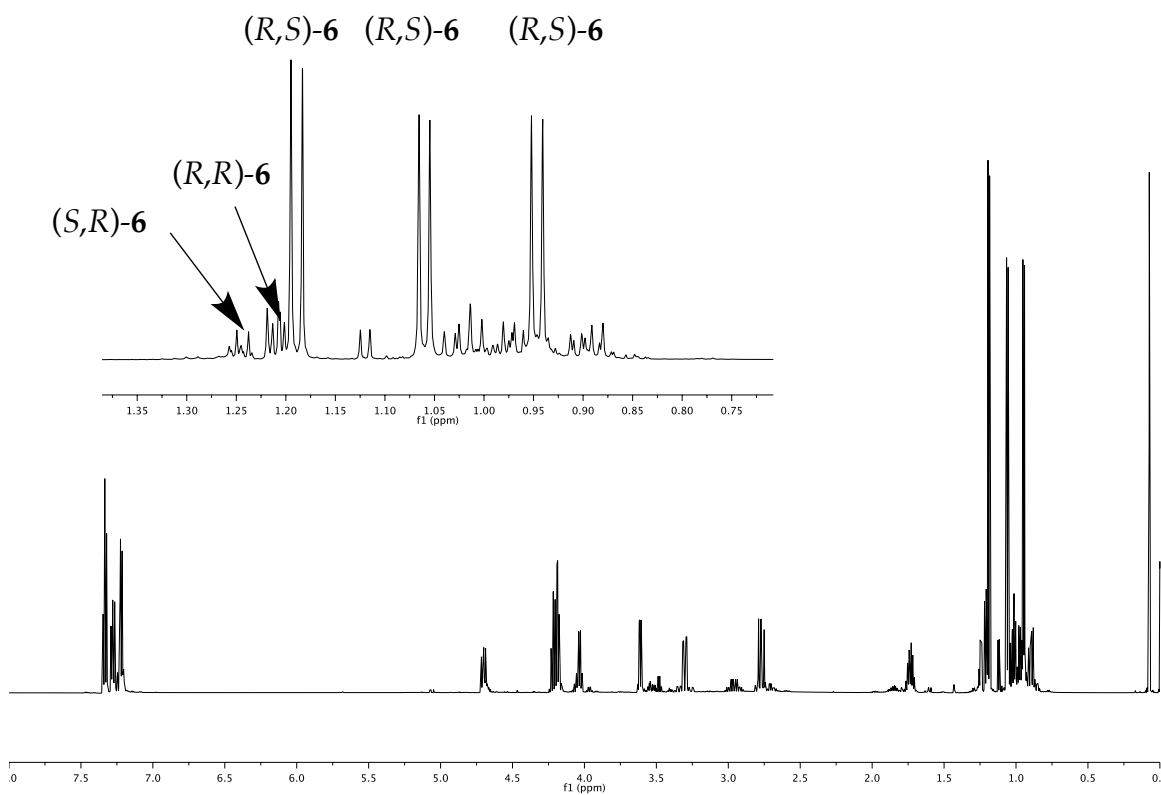

**Figure 14.** <sup>1</sup>H NMR spectrum of the aldol between enolate **5** and isobutyraldehyde. The major product, (R,S)-**6**, and the two minor products (S,R)-**6** and (R,R)-**6** are highlighted.



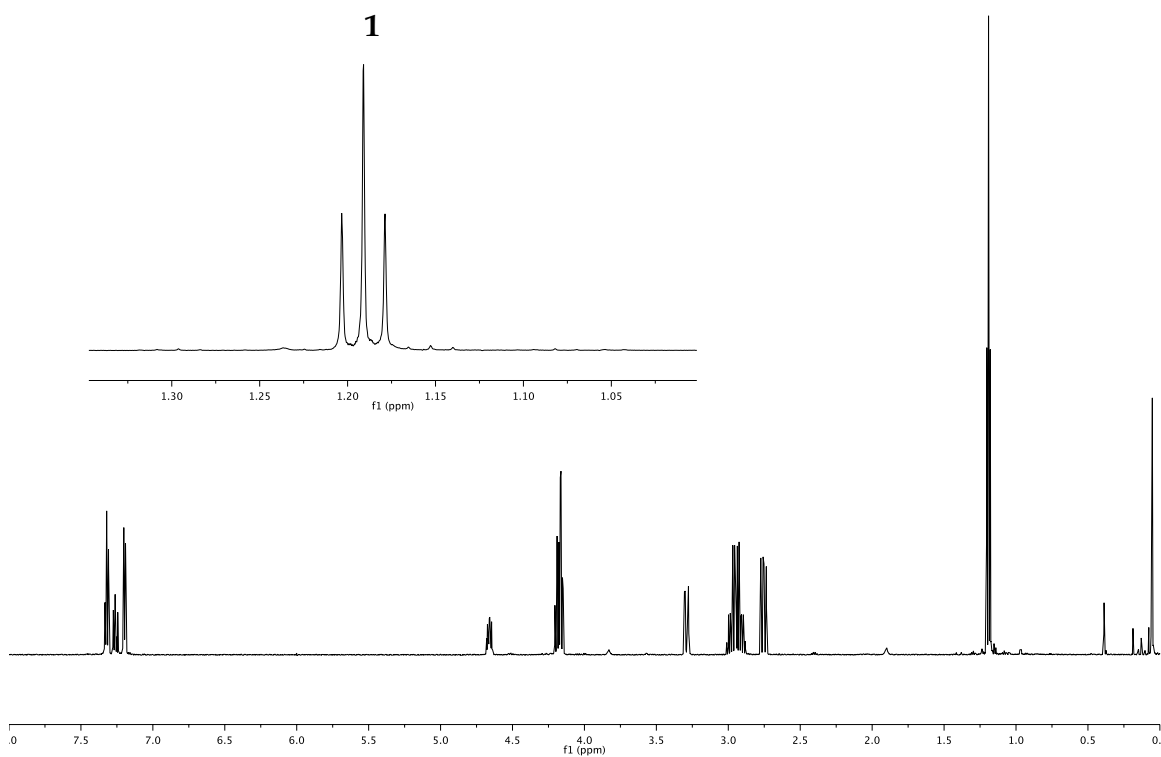

**Figure 15.** <sup>1</sup>H NMR spectrum of the aldol reaction between enolate **5** and isobutyraldehyde, pre-mixing LDA and aldehyde before adding the oxazolidinone **1**. Due to pre-reacting with the aldehyde, no LDA is available to lithiate **1**, so upon quench and workup only unreacted **1** is recovered.

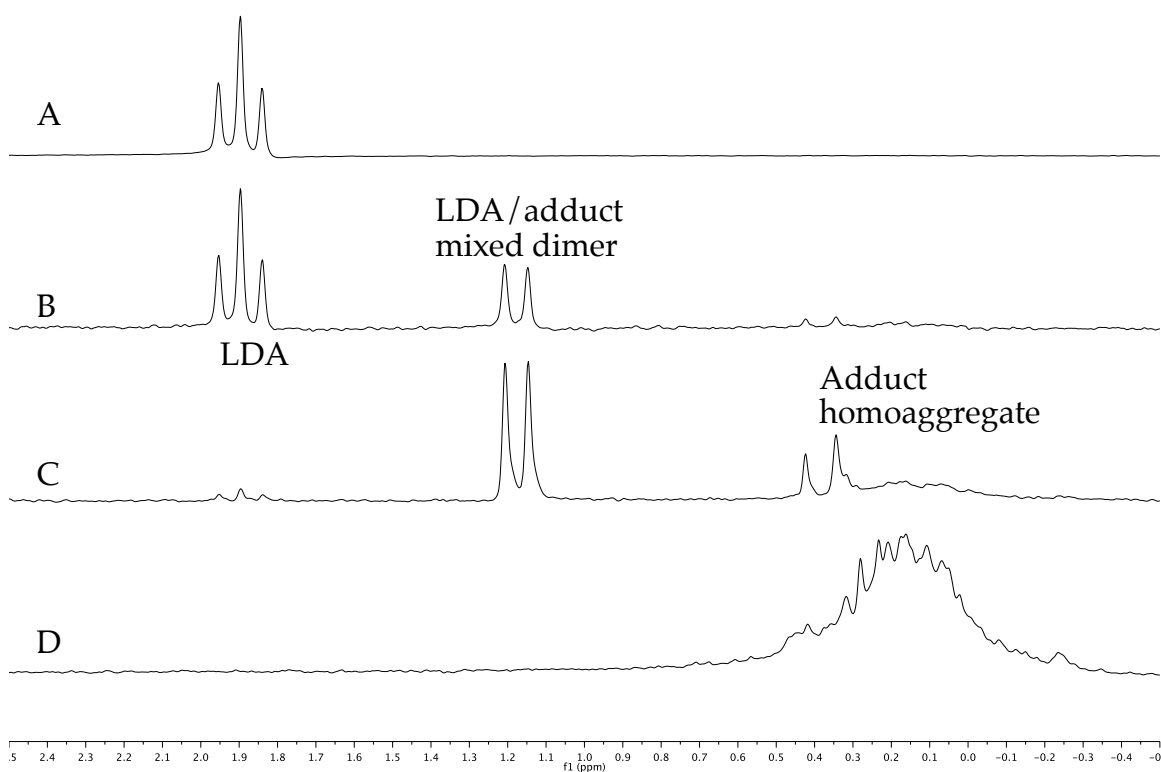

**Figure 16.**  ${}^6\text{Li}$  NMR spectra of 0.10 M  $[{}^6\text{Li}^{15}\text{N}]$ LDA with varying equiv of isobutyraldehyde: A) 0.0 equiv; B) 0.50 equiv; C) 1.0 equiv; D) 2.0 equiv. The isobutyraldehyde first forms a 1,2-mixed adduct/LDA dimer before forming an undecipherable oligomer that is presumably a ladderred 1,2-adduct homoaggregate.

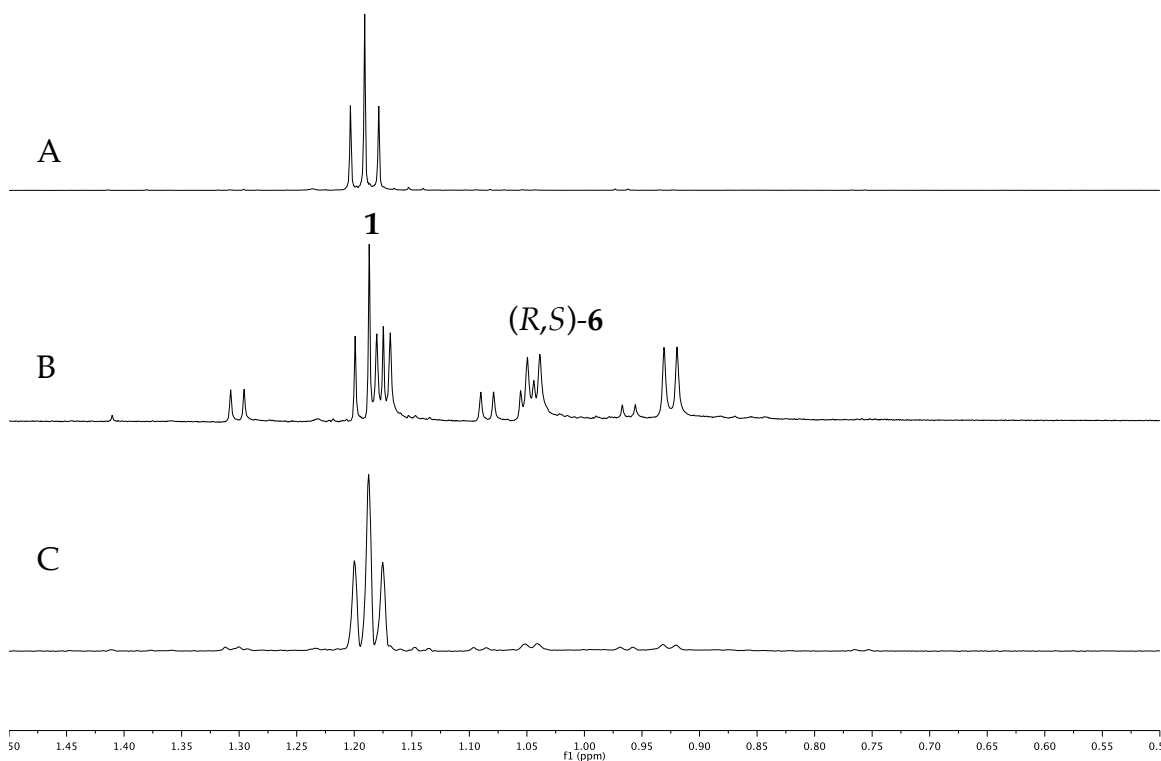

**Figure 17.** A) <sup>1</sup>H NMR spectrum of 1.0 equiv LDA treated sequentially with 0.50 equiv isobutyraldehyde and 1.0 equiv of oxazolidinone **1** followed by standard workup. Owing to the aldehyde pre-reacting with the LDA, it is inaccessible to the 0.50 equiv of **5** formed by the 0.50 equiv LDA remaining and 1.0 equiv of **1**. This resulted in only unreacted starting material being recovered. B) <sup>1</sup>H NMR spectrum of 1.0 equiv LDA, then add 0.50 equiv isobutyraldehyde, then 1.0 equiv of oxazolidinone **1**, then add 1.50 equiv isobutyraldehyde, followed by standard workup. As in A, 0.50 equiv of **5** is produced but the subsequent addition of excess isobutyraldehyde uses this to react and form **6** in approximately the same diastereomeric ratio as previously seen. C) <sup>1</sup>H NMR spectrum of 1.0 equiv LDA, then add 2.0 equiv isobutyraldehyde, then 1.0 equiv of oxazolidinone **1**, followed by standard workup. The isobutyraldehyde has consumed all of the LDA, leaving none for the enolization of **1**, resulting in no aldol reaction.

### Part 3: Finding the Reactive Species of Enolate 5

---

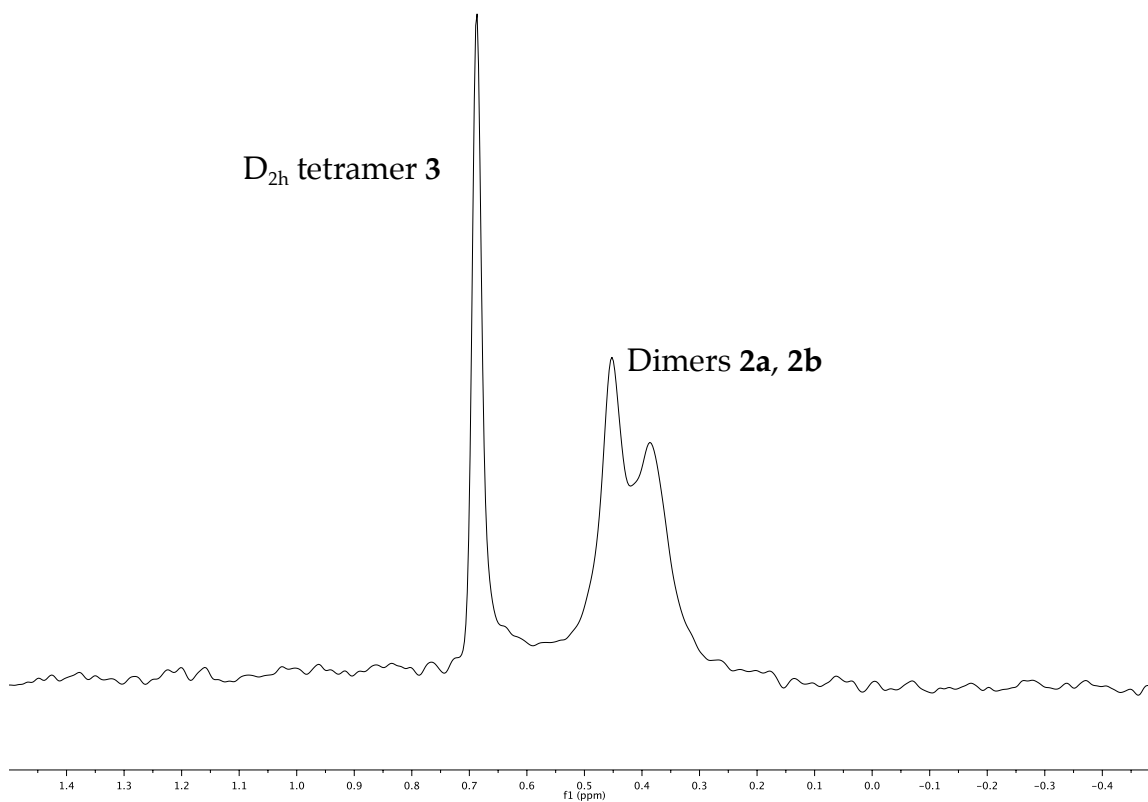

**Figure 18.**  ${}^6\text{Li}$  NMR spectrum of 0.10 M enolate 5 in THF previously aged at 0 °C and recorded at -80 °C.

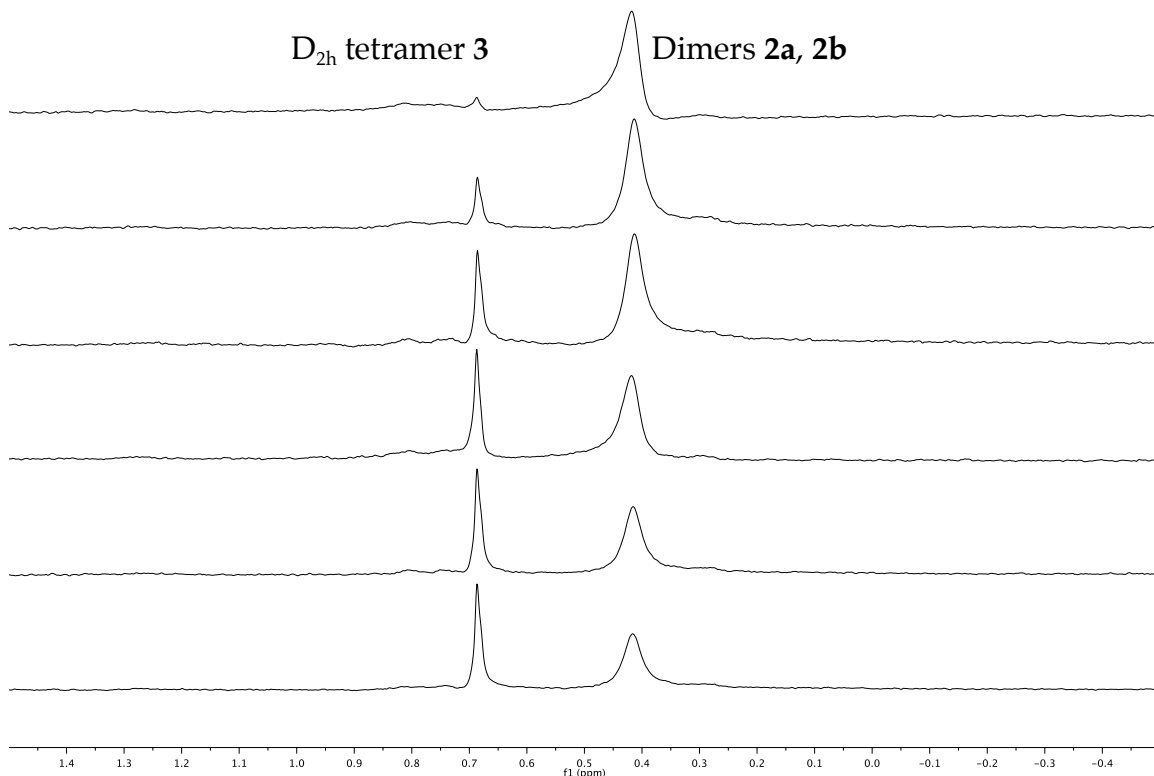

**Figure 19.**  $^6\text{Li}$  NMR spectra of **5** aging over the course of 200 minutes (0.10 M **5**, THF,  $-60\text{ }^\circ\text{C}$ )

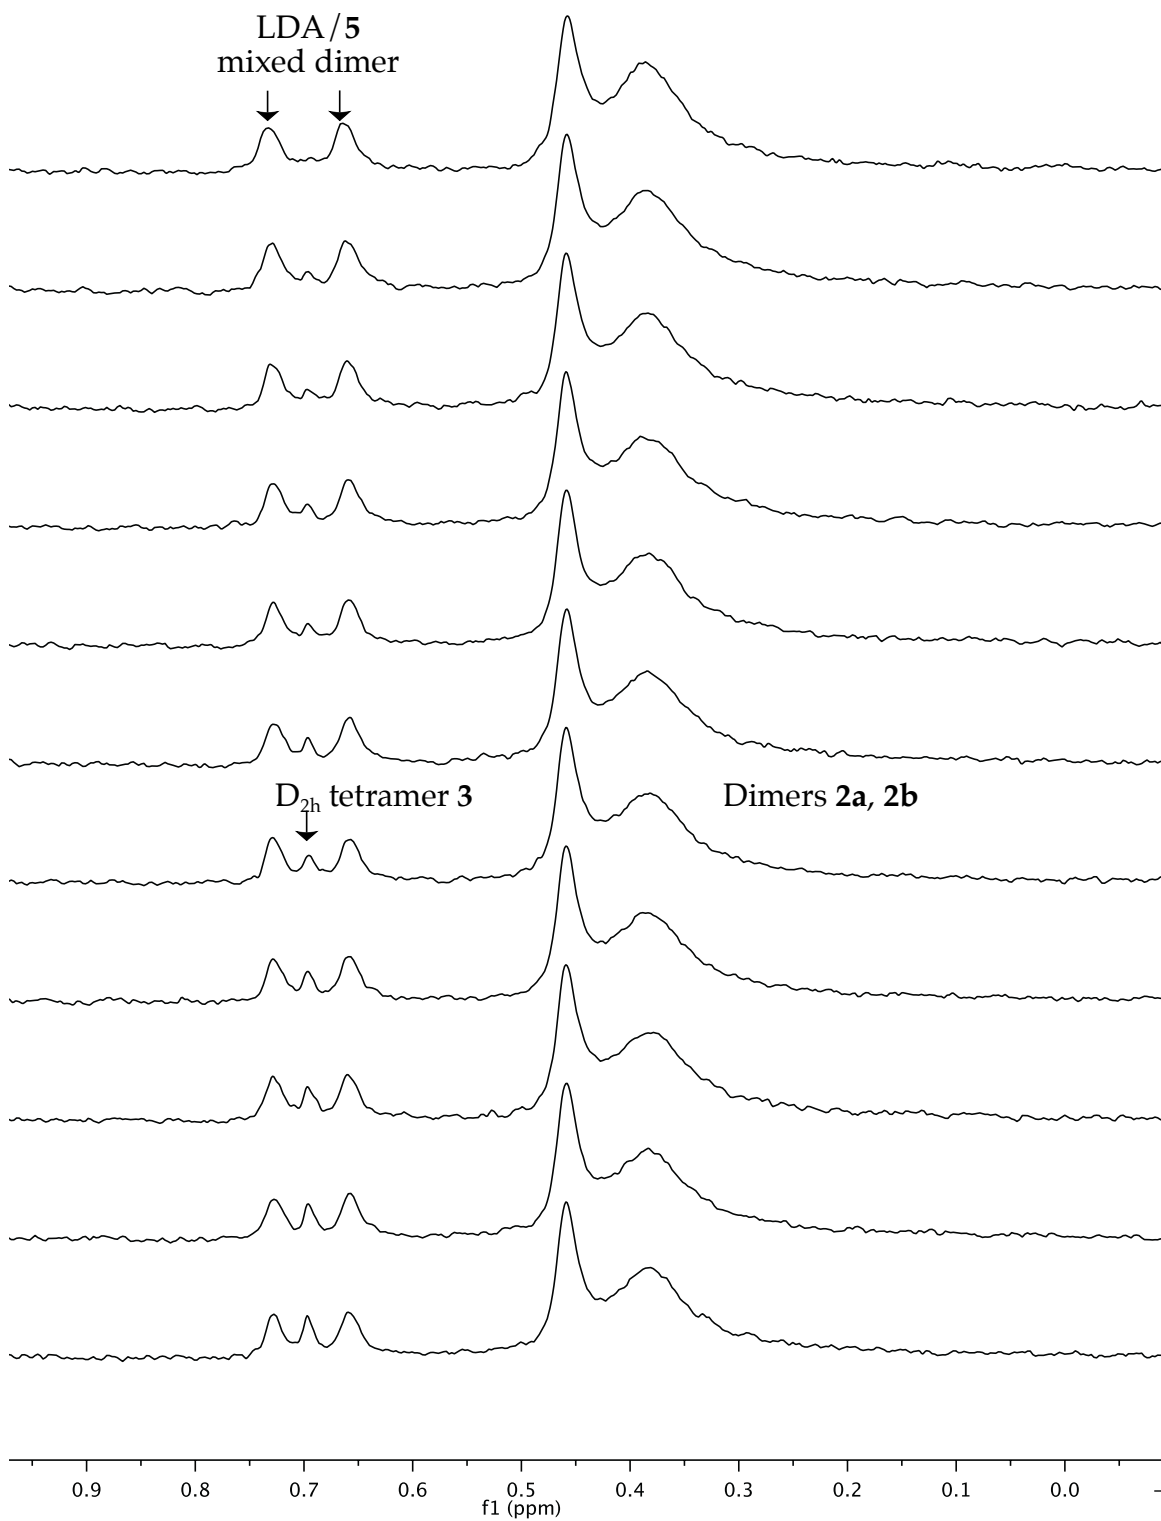

**Figure 20.**  $^6\text{Li}$  NMR spectra of enolate **5** aging over the course of 388 minutes (0.10 M **5**, 0.010 M excess [ $^6\text{Li}^{15}\text{N}$ ]LDA, THF,  $-80\text{ }^\circ\text{C}$ )

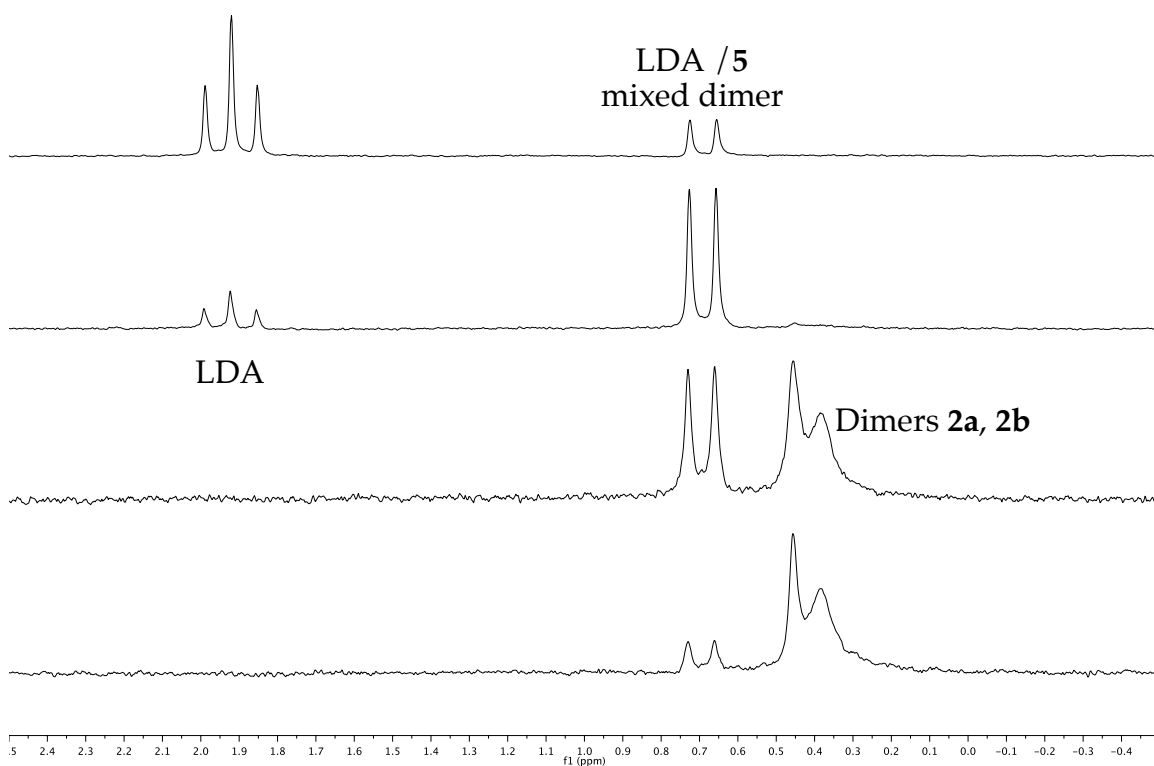

**Figure 21.**  $^6\text{Li}$  NMR spectra of the sequential addition of the oxazolidinone precursor of **5** to  $[\text{}^6\text{Li}^{15}\text{N}]\text{LDA}$ , (0.16, 0.50, 0.84, 1.0 eq of the oxazolidinone of **5**, 0.10 M  $[\text{}^6\text{Li}^{15}\text{N}]\text{LDA}$ , THF,  $-60\text{ }^\circ\text{C}$ )

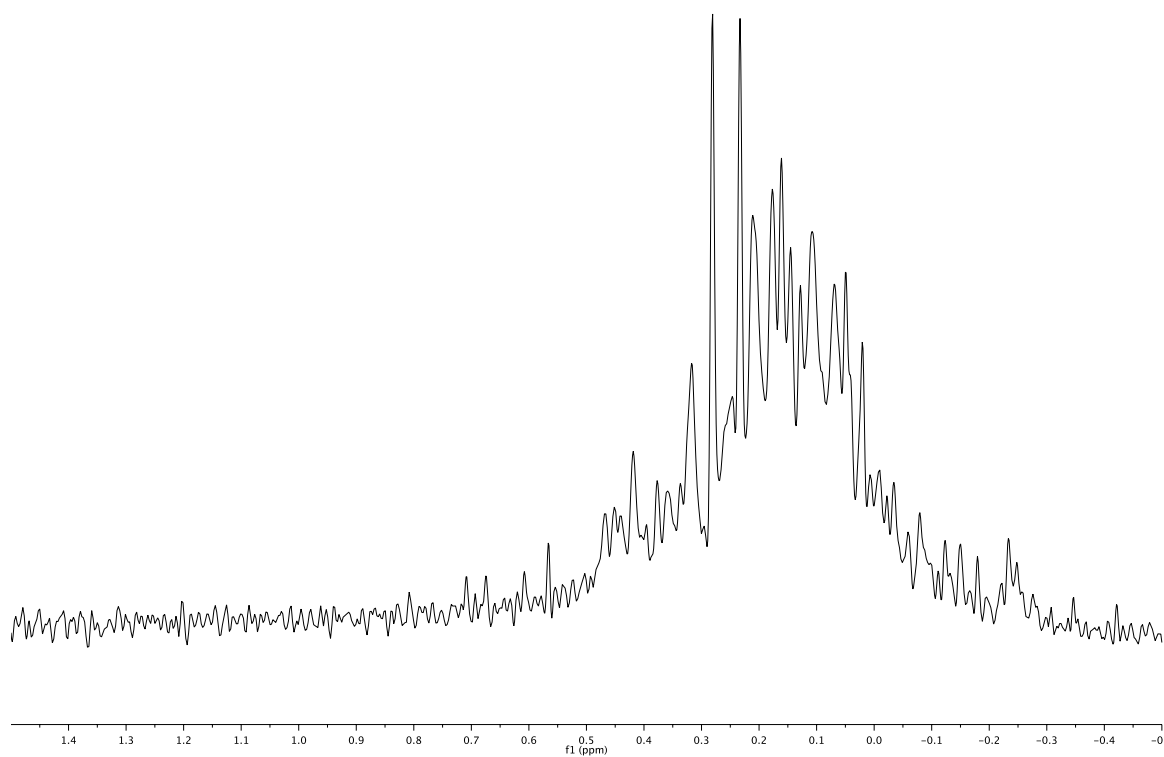

**Figure 22.**  ${}^6\text{Li}$  NMR spectrum of (*R,S*)-**6** (0.10 M **5**, 0.20 M isobutyraldehyde, THF,  $-80\text{ }^\circ\text{C}$ )



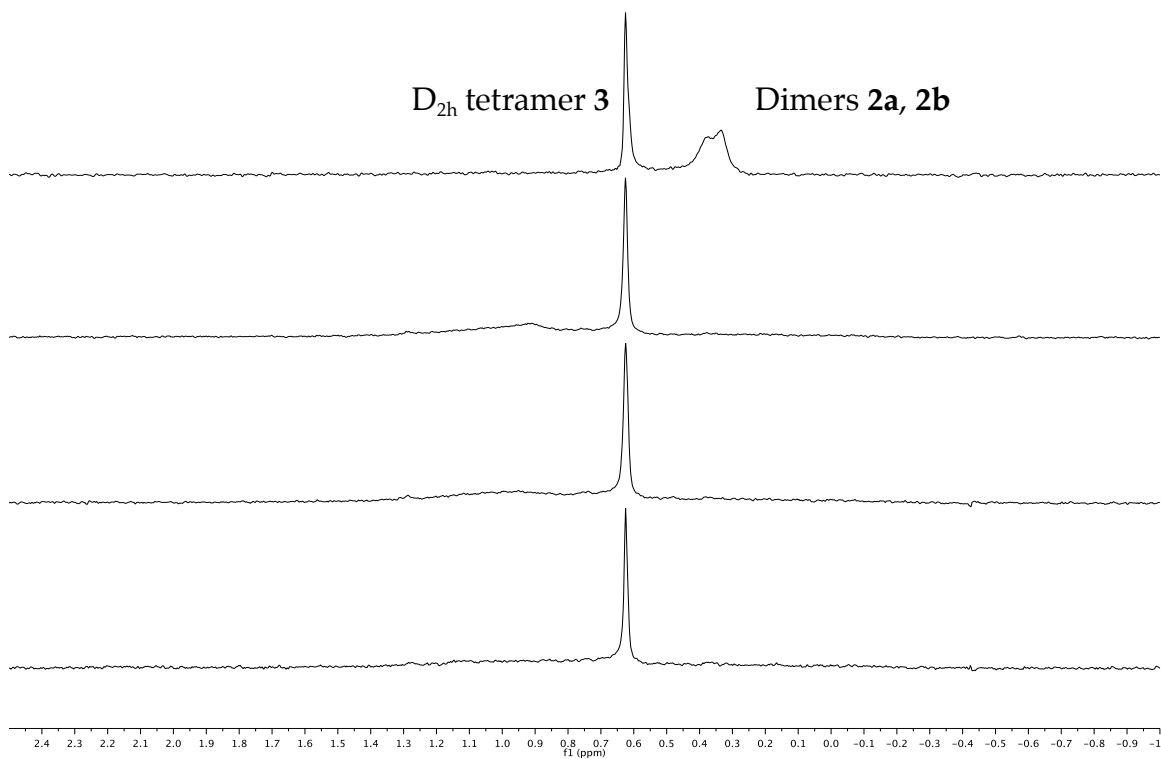

**Figure 23.**  $^6\text{Li}$  NMR spectra of equilibrated enolate **5**, followed by aging with the addition of isobutyraldehyde at  $-70\text{ }^\circ\text{C}$  for 4, 20, and 44 minutes (0.10 M **5**, 0.20 M isobutyraldehyde, THF,  $-80\text{ }^\circ\text{C}$ ). The resulting peaks corresponding to (*R,S*)-**6** are too broad to be seen.

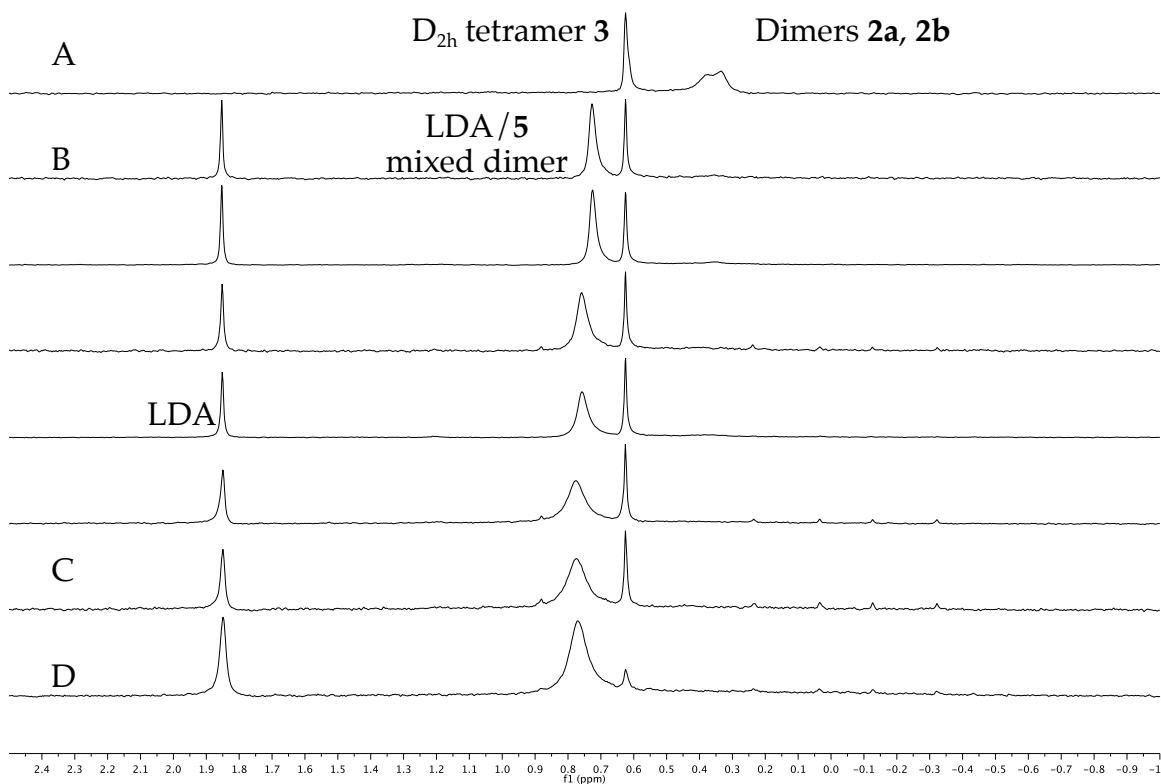

**Figure 24.**  $^6\text{Li}$  NMR spectra of the addition of LDA to an equilibrated sample of **5** (A) aged for 160 minutes (B-C), followed by aging at  $0\text{ }^\circ\text{C}$  for 10 min (D) (0.10 **5**, 0.20 M isobutyraldehyde, THF,  $-70\text{ }^\circ\text{C}$ ), illustrating the extraordinarily slow equilibration out of tetramer to the energetically more favorable LDA mixed dimer.

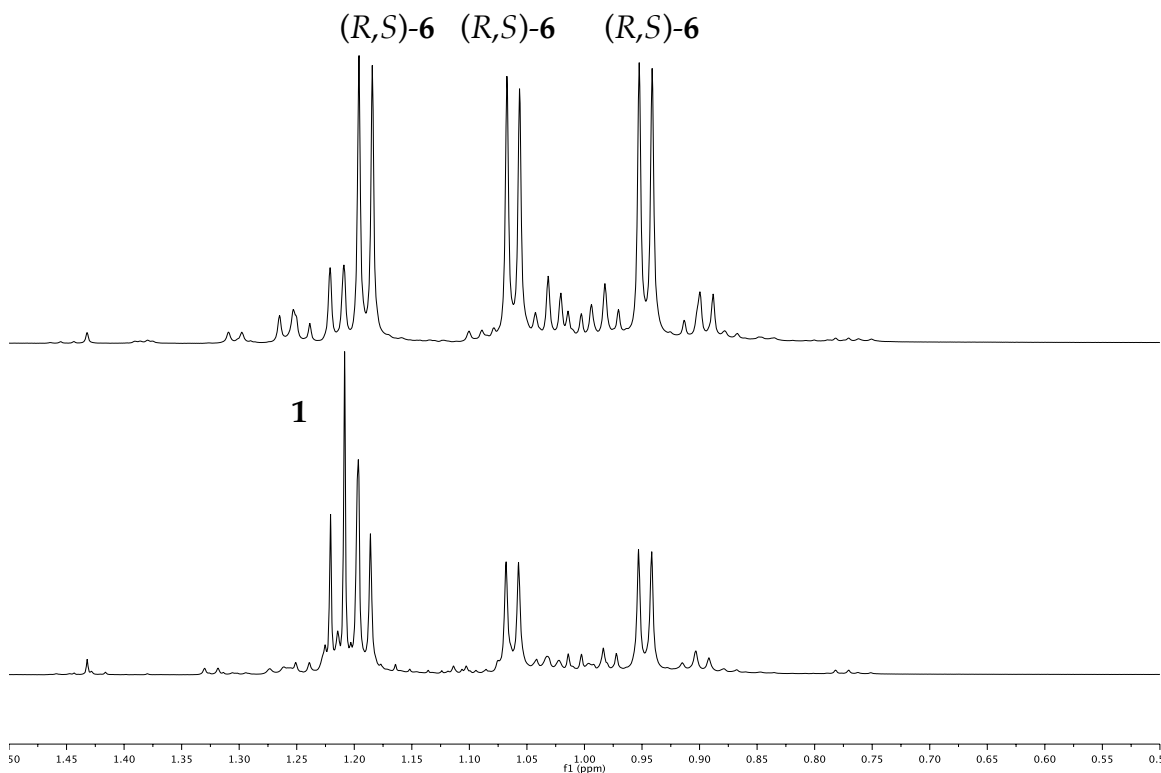

**Figure 25.** <sup>1</sup>H NMR spectra on an unaged **5** and **5** aged 30 minutes at 0° C prior to the aldol in neat THF on the aldol product distribution (0.10 M **5**, 0.20 M isobutyraldehyde, THF, -80 °C). Tetramer is present in the aged sample, resulting in the recovery of significant amounts of unreacted starting material **1** corresponding to the amount of **5** in tetramer. Some dimer does exist in the equilibrated sample in neat THF, resulting in some reactivity.

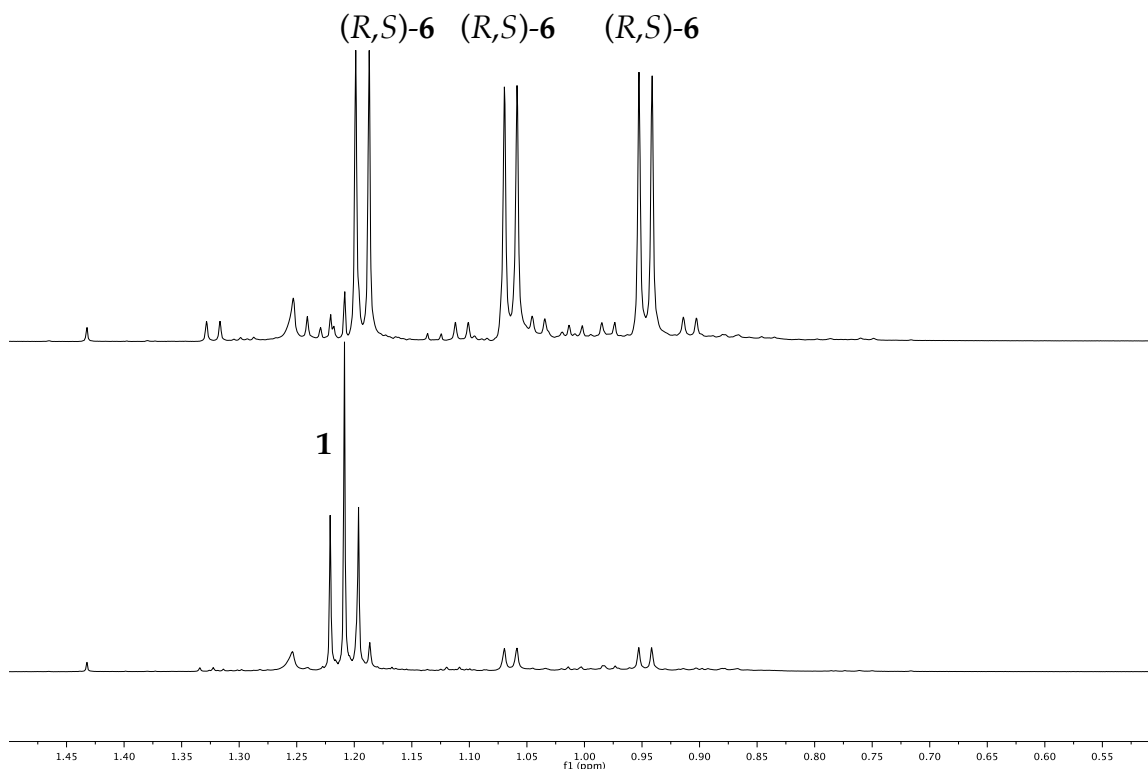

**Figure 26.**  $^1\text{H}$  NMR spectra on an unaged enolate **5** and enolate **5** aged 30 minutes at  $0^\circ\text{C}$  prior to the aldol in low THF on the aldol product distribution (0.10 M **5**, 0.20 M isobutyraldehyde, 0.20 M THF, toluene,  $-80^\circ\text{C}$ ). In the aged sample in low THF there is minimal dimer present, resulting in minimal reactivity.

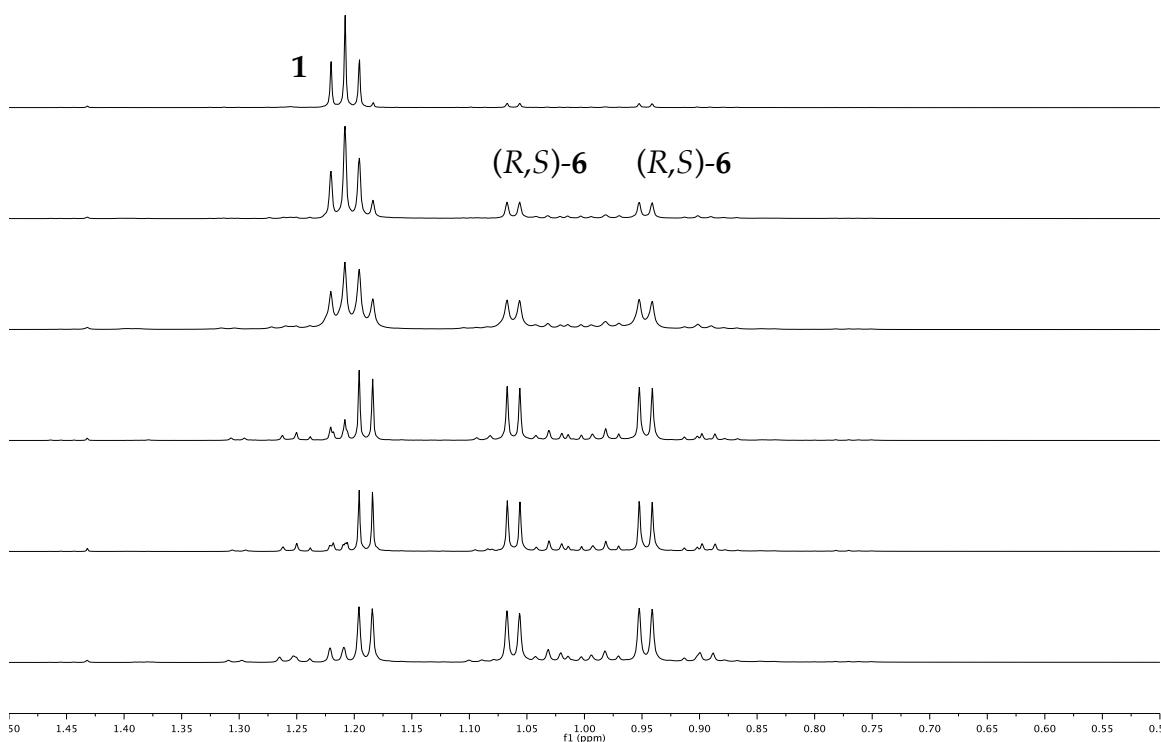

**Figure 27.** <sup>1</sup>H NMR spectra changing equivalents of isobutyraldehyde (0.10, 0.25, 0.50, 1.0, 1.5, 2.0) on the aldol product distribution in neat THF with an unaged enolate (0.10 M **5**, changing isobutyraldehyde, THF, -80 °C). The amount of recovered starting material corresponds to the deficit of aldehyde as expected. Notably no erosion of selectivity is observed.

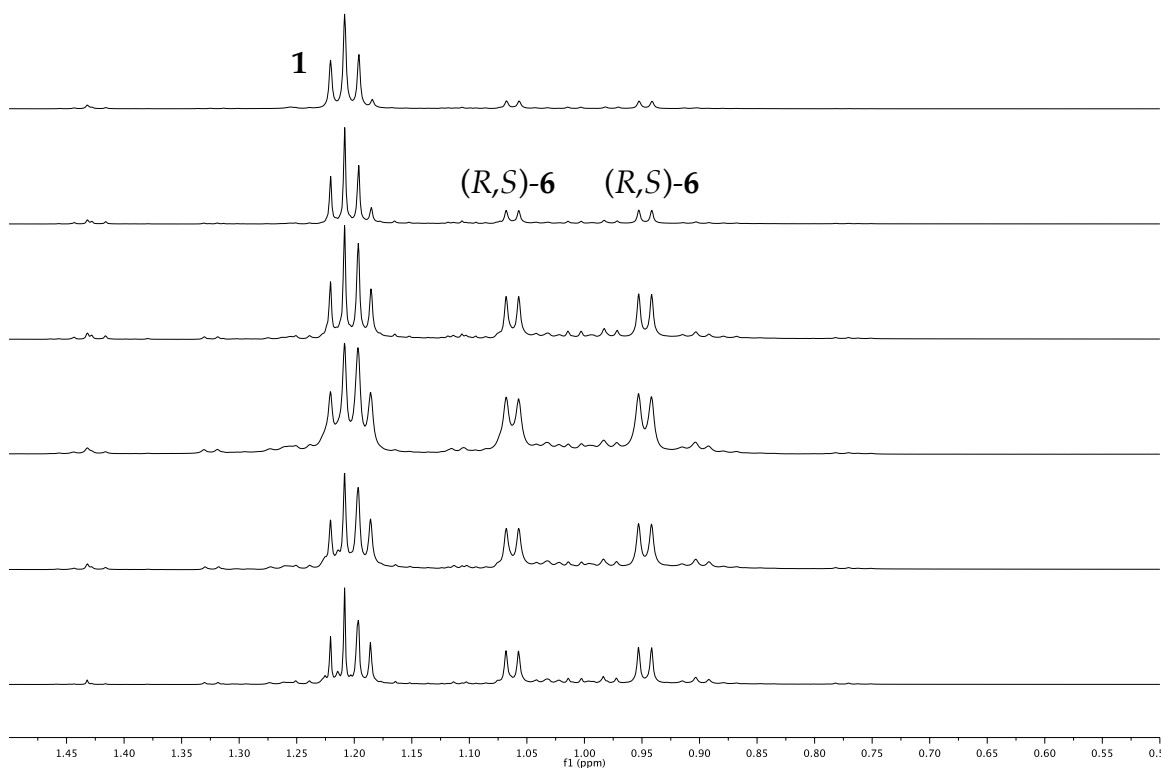

**Figure 28.**  $^1\text{H}$  NMR spectra changing equivalents of isobutyraldehyde (0.10, 0.25, 0.50, 1.0, 1.5, 2.0) on the aldol product distribution in neat THF with enolate **5** aged 30 minutes at  $0\text{ }^\circ\text{C}$  (0.10 M **5**, changing isobutyraldehyde, THF,  $-80\text{ }^\circ\text{C}$ ). The amount of recovered starting material corresponds to the deficit of aldehyde until the dimer is used up, after which no further reactivity is observed. Notably no erosion of selectivity is observed.

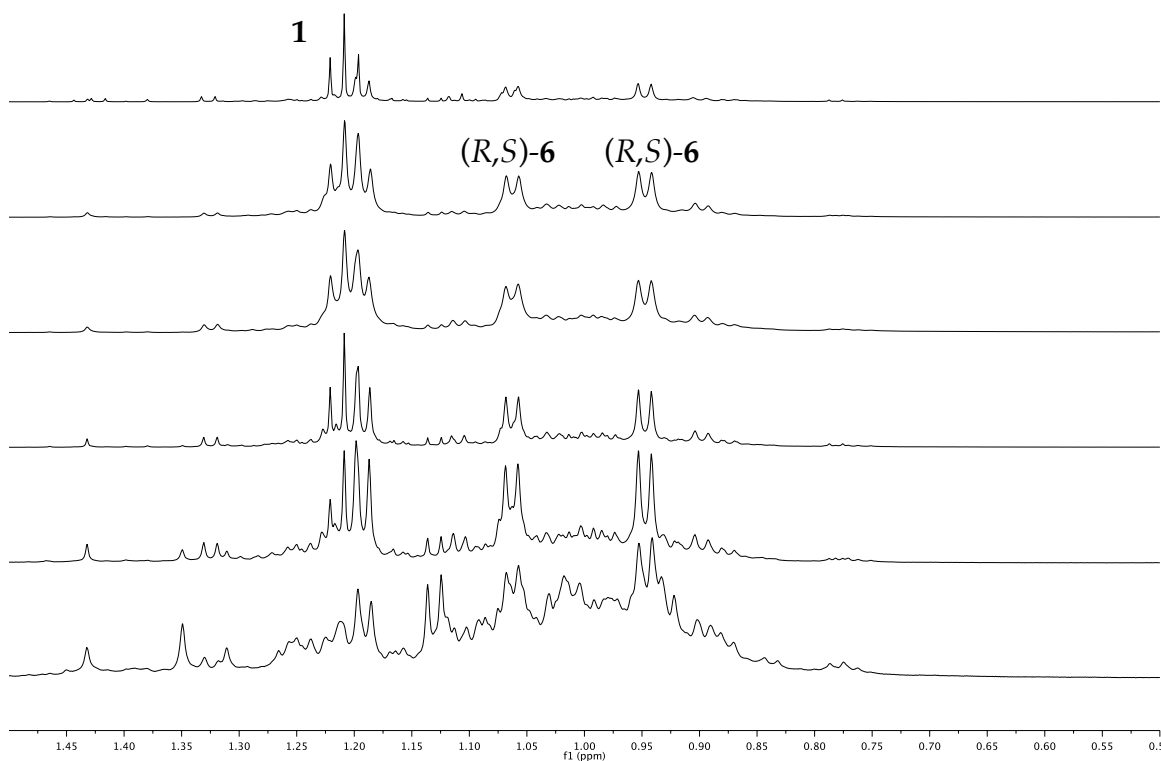

**Figure 29.**  $^1\text{H}$  NMR spectra changing equivalents of LDA (1.1, 1.25, 1.5, 2.0, 2.5, 3.0) on the aldol product distribution in neat THF with an enolate aged 30 minutes at  $0\text{ }^\circ\text{C}$  (0.10 M 5, 0.20 M isobutyraldehyde, THF,  $-80\text{ }^\circ\text{C}$ ). Additional LDA does not improve either the selectivity or the percent conversion but does lead to degradation of the sample.

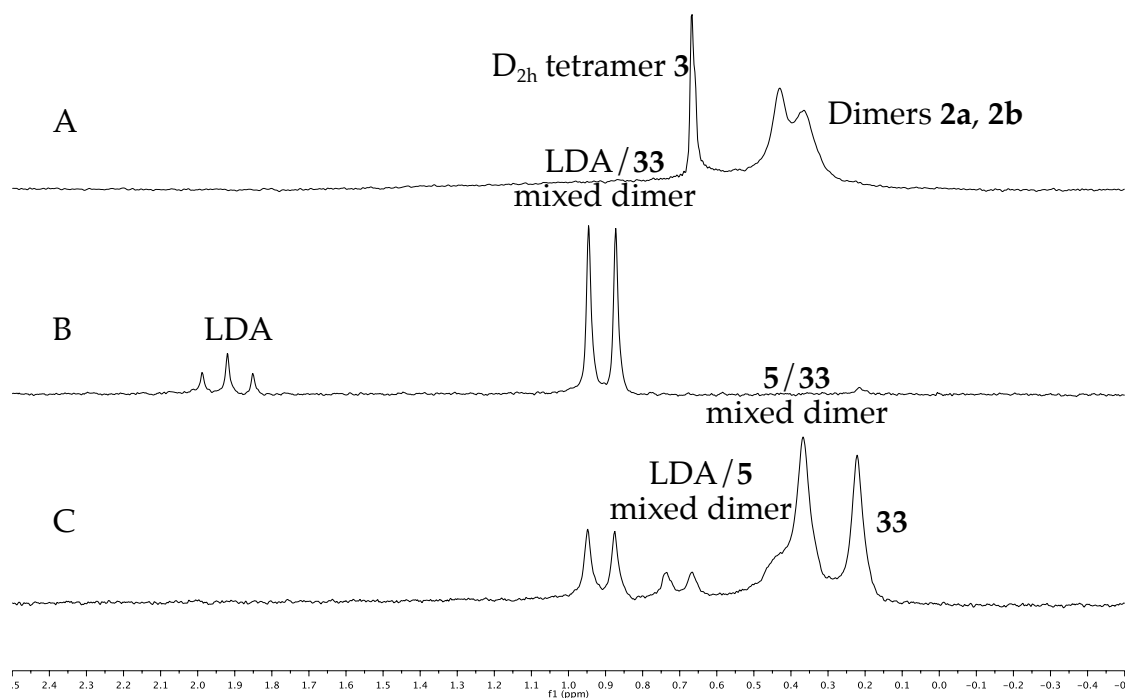

**Figure 30.** Kinetic mixed dimer formation. Spectrum A is an equilibrated sample of **5**. Spectrum B is **33** with 1 additional equivalent of  $[\text{}^6\text{Li}]\text{LDA}$ . Spectrum C is spectra 2 plus one equivalent of oxazolidinone **1** unaged. (0.10 M **5**, 0.10 M **33**, THF,  $-78\text{ }^\circ\text{C}$ )



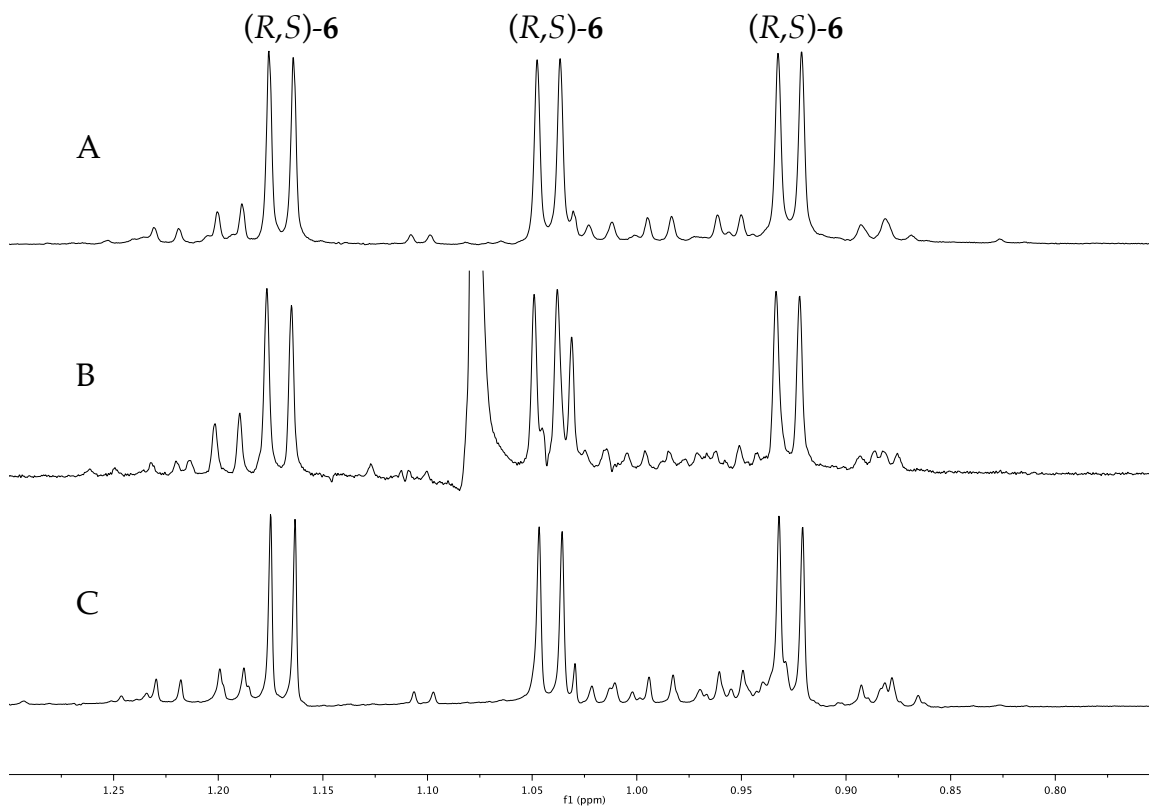

**Figure 31.** Kinetic mixed dimer selectivities. Spectrum A is enolate **5** alone. Spectrum B is enolate **5** plus one equivalent of enolate **33**. Spectrum C is enolate **5** plus one equivalent of enolate **34**. (0.10 M **5**, 0.10 M **33**/**34**, 0.20 M isobutyraldehyde, THF, -78 °C). No change in selectivity or percent conversion is noted.

## Part 4: Ketone Aldol Kinetics

---

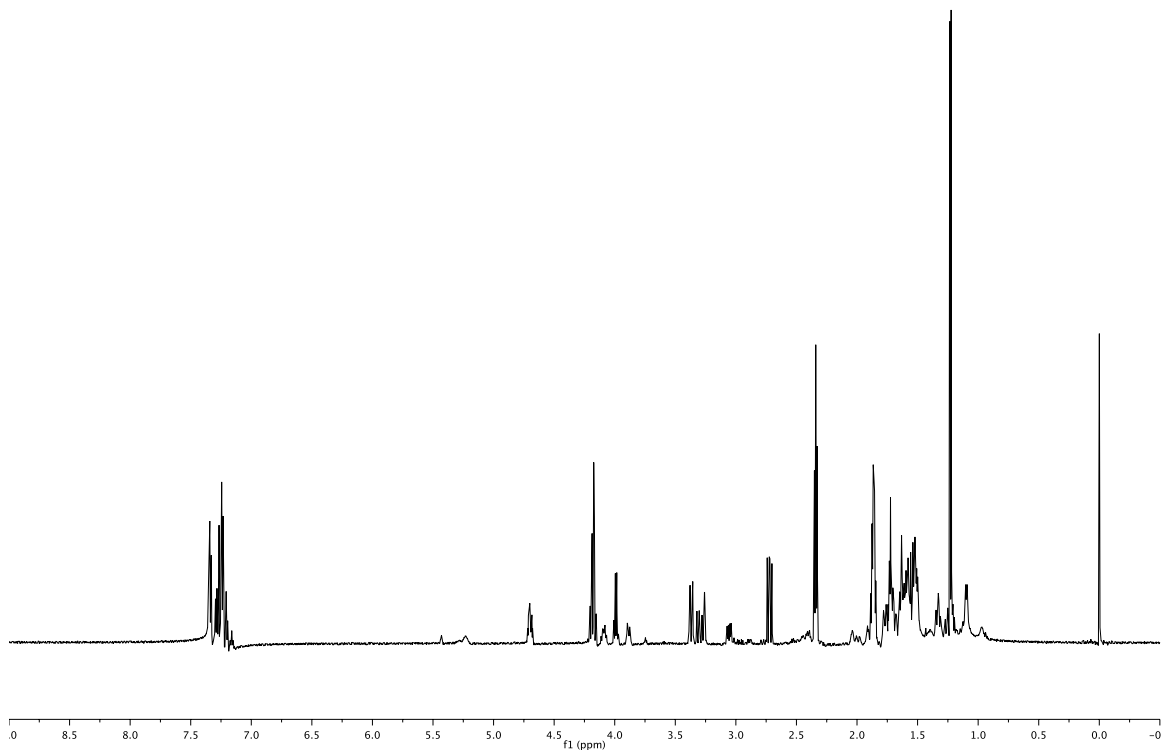

**Figure 32.**  $^1\text{H}$  NMR spectra of crude aldol product of the aldol reaction between cyclohexanone and enolate **5**.

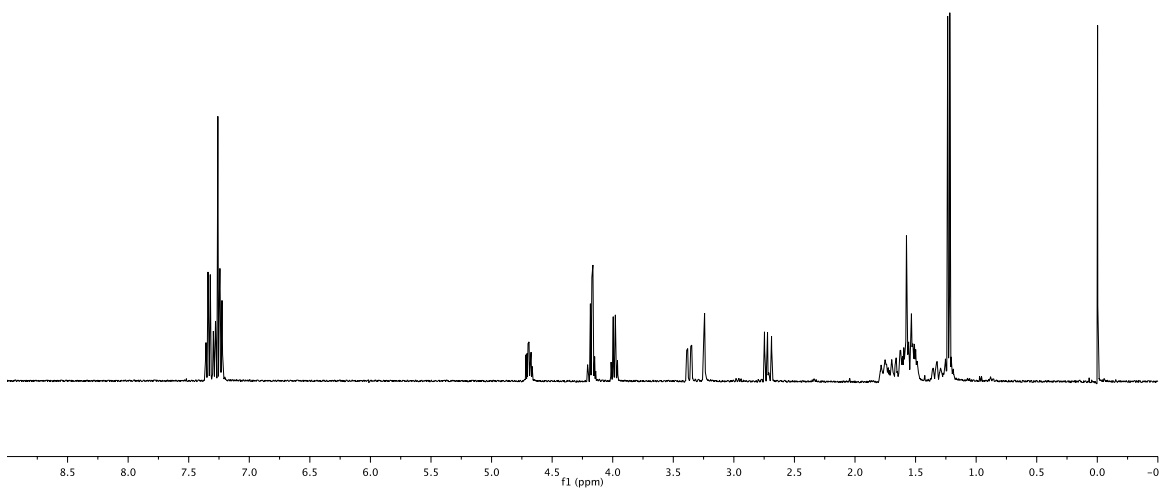

**Figure 33.**  $^1\text{H}$  NMR spectrum of recrystallized (*R*)-7

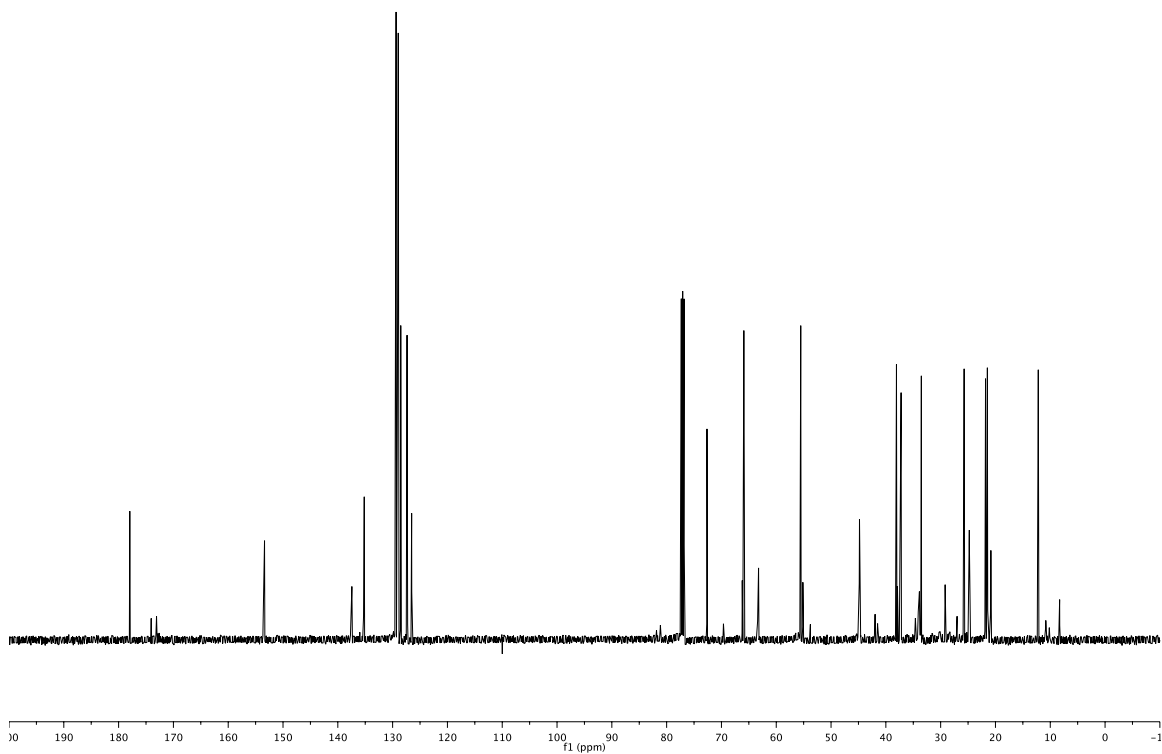

**Figure 34.**  $^{13}\text{C}$  NMR spectrum of recrystallized (*R*)-7

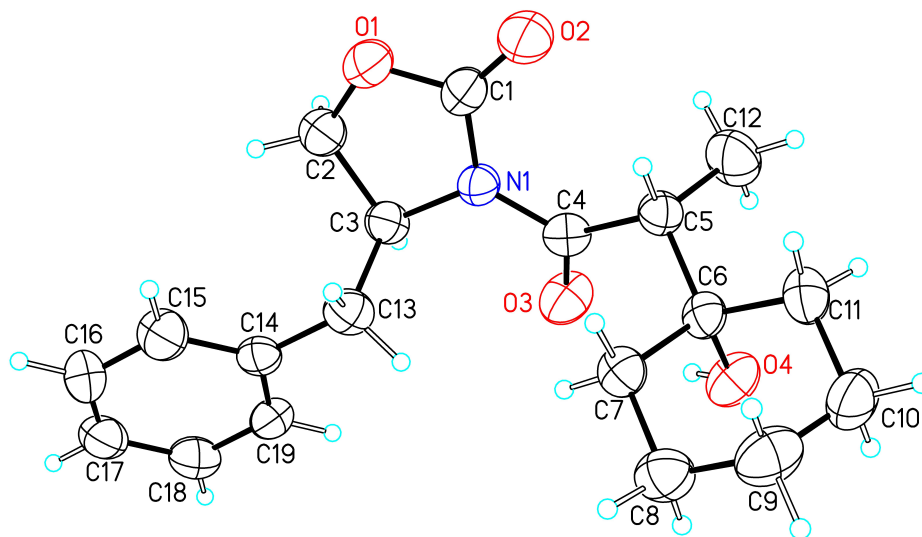

**Figure 35.** X-ray crystal structure of (R)-7.

**Table 3.** Crystal data and structural refinement of recrystallized (R)-7 aldol product

|                                   |                                                  |          |
|-----------------------------------|--------------------------------------------------|----------|
| Empirical formula                 | C <sub>19</sub> H <sub>25</sub> N O <sub>4</sub> |          |
| Formula weight                    | 331.40                                           |          |
| Temperature                       | 296(2) K                                         |          |
| Wavelength                        | 0.71073 Å                                        |          |
| Crystal system                    | Orthorhombic                                     |          |
| Space group                       | P2(1)2(1)2(1)                                    |          |
| Unit cell dimensions              | a = 5.7701(6) Å                                  | a = 90°. |
|                                   | b = 13.3976(12) Å                                | b = 90°. |
|                                   | c = 22.752(2) Å                                  | g = 90°. |
| Volume                            | 1758.8(3) Å <sup>3</sup>                         |          |
| Z                                 | 4                                                |          |
| Density (calculated)              | 1.252 Mg/m <sup>3</sup>                          |          |
| Absorption coefficient            | 0.087 mm <sup>-1</sup>                           |          |
| F(000)                            | 712                                              |          |
| Crystal size                      | 0.60 x 0.05 x 0.03 mm <sup>3</sup>               |          |
| Theta range for data collection   | 1.76 to 23.84°.                                  |          |
| Index ranges                      | -6 ≤ h ≤ 5, -14 ≤ k ≤ 15, -25 ≤ l ≤ 18           |          |
| Reflections collected             | 5883                                             |          |
| Independent reflections           | 2552 [R(int) = 0.0270]                           |          |
| Completeness to theta = 23.84°    | 98.4 %                                           |          |
| Absorption correction             | Semi-empirical from equivalents                  |          |
| Max. and min. transmission        | 0.9978 and 0.9495                                |          |
| Refinement method                 | Full-matrix least-squares on F <sup>2</sup>      |          |
| Data / restraints / parameters    | 2552 / 0 / 217                                   |          |
| Goodness-of-fit on F <sup>2</sup> | 1.060                                            |          |
| Final R indices [I > 2σ(I)]       | R1 = 0.0356, wR2 = 0.0662                        |          |
| R indices (all data)              | R1 = 0.0812, wR2 = 0.0808                        |          |
| Absolute structure parameter      | 0.8(16)                                          |          |
| Largest diff. peak and hole       | 0.118 and -0.168 e.Å <sup>-3</sup>               |          |

**Table 4.** Atomic coordinates ( $\times 10^4$ ) and equivalent isotropic displacement parameters ( $\text{\AA}^2 \times 10^3$ ).  $U(\text{eq})$  is defined as one third of the trace of the orthogonalized  $U^{ij}$  tensor.

|       | x       | y       | z        | U(eq) |
|-------|---------|---------|----------|-------|
| O(1)  | 4296(3) | 6930(1) | -12(1)   | 68(1) |
| O(2)  | 4965(4) | 7541(2) | 882(1)   | 77(1) |
| O(3)  | 9589(3) | 5158(1) | 911(1)   | 66(1) |
| O(4)  | 9808(3) | 4834(1) | 2108(1)  | 62(1) |
| N(1)  | 6643(4) | 6055(1) | 563(1)   | 44(1) |
| C(1)  | 5273(5) | 6904(2) | 522(1)   | 56(1) |
| C(2)  | 5259(6) | 6162(2) | -383(1)  | 66(1) |
| C(3)  | 6456(5) | 5441(2) | 31(1)    | 47(1) |
| C(4)  | 8138(5) | 5797(2) | 1015(1)  | 47(1) |
| C(5)  | 7865(4) | 6244(2) | 1621(1)  | 47(1) |
| C(6)  | 7690(4) | 5397(2) | 2085(1)  | 44(1) |
| C(7)  | 5682(4) | 4701(2) | 1941(1)  | 50(1) |
| C(8)  | 5253(6) | 3916(2) | 2414(1)  | 65(1) |
| C(9)  | 4904(6) | 4384(2) | 3010(1)  | 75(1) |
| C(10) | 6968(6) | 5037(2) | 3159(1)  | 72(1) |
| C(11) | 7367(6) | 5836(2) | 2695(1)  | 64(1) |
| C(12) | 9875(6) | 6976(2) | 1725(1)  | 79(1) |
| C(13) | 5087(5) | 4496(2) | 166(1)   | 55(1) |
| C(14) | 4892(5) | 3801(2) | -348(1)  | 45(1) |
| C(15) | 2988(5) | 3791(2) | -714(1)  | 62(1) |
| C(16) | 2856(6) | 3138(2) | -1181(1) | 71(1) |
| C(17) | 4593(6) | 2484(2) | -1289(1) | 65(1) |
| C(18) | 6497(6) | 2472(2) | -932(1)  | 66(1) |
| C(19) | 6653(5) | 3132(2) | -462(1)  | 56(1) |

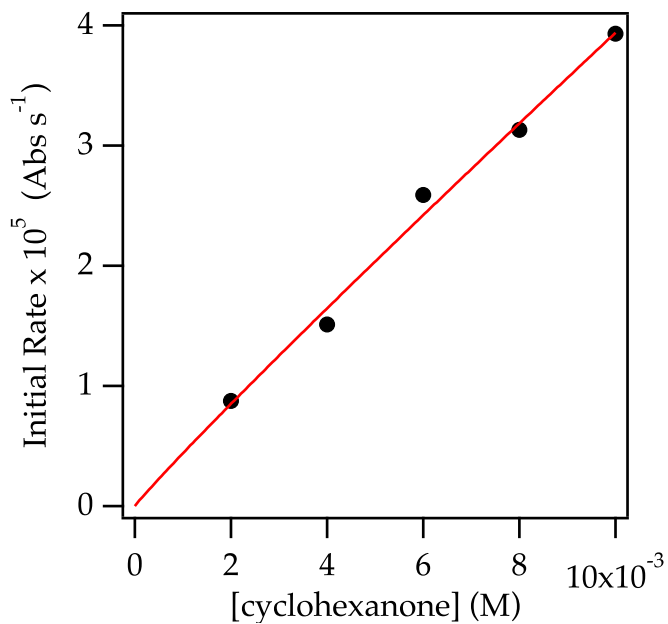

**Figure 36.** Plot of initial rate vs. [cyclohexanone] in neat THF at -78 °C (0.1 M of oxazolidinone **1**, 0.095 M LDA, THF, -78 °C). The data was fit to  $y = ax^b$  such that  $b = 0.95 \pm 0.06$  corresponding to a first-order dependence on cyclohexanone.

| [cyclohexanone] | Initial Rate × 10 <sup>5</sup> |
|-----------------|--------------------------------|
| 0.01            | 3.93                           |
| 0.008           | 3.13                           |
| 0.006           | 2.59                           |
| 0.004           | 1.51                           |
| 0.002           | 0.875                          |



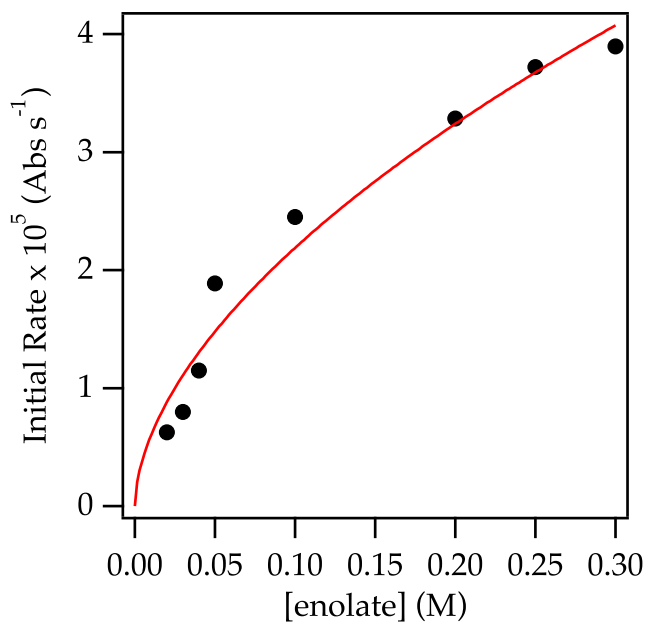

**Figure 37.** Plot of initial rate vs. [5] in neat THF at -78 °C (0.95 equiv LDA, 0.005 M cyclohexanone, THF, -78 °C). The data was fit to  $y = ax^b$ , such that  $b = 0.57 \pm 0.05$  corresponding to a half-order dependence on 5.

| [5]  | Initial Rate x 10 <sup>5</sup> |
|------|--------------------------------|
| 0.02 | 0.589                          |
| 0.03 | 1.059                          |
| 0.04 | 1.089                          |
| 0.05 | 2.918                          |
| 0.1  | 3.115                          |
| 0.2  | 3.744                          |
| 0.25 | 5.115                          |
| 0.3  | 4.647                          |

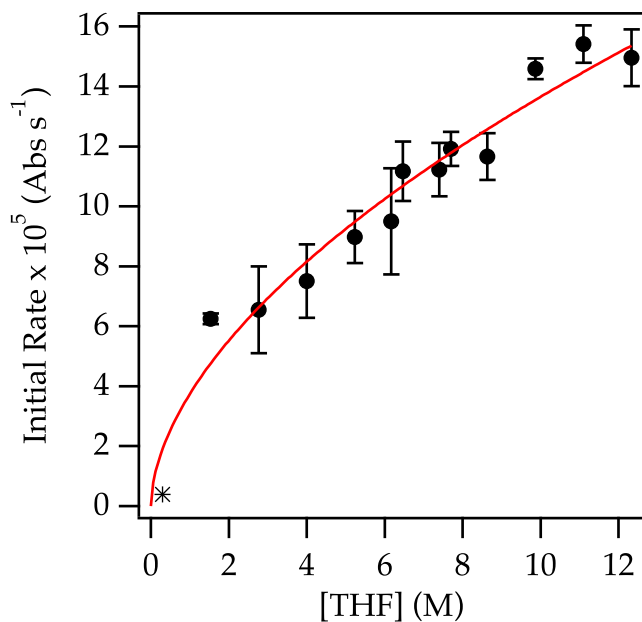

**Figure 38.** Plot of initial rate vs. [THF] with toluene cosolvent at -78 °C (0.10 M of oxazolidinone **1**, 0.095 M LDA, 0.005 M cyclohexanone, -78 °C). The data was fit to  $y = ax^b$ , such that  $b = 0.56 \pm 0.05$  corresponding to a half-order dependence on THF. The \* denotes a measured point that was not included in the fit.

| [THF] | Initial Rate x 10 <sup>5</sup> |
|-------|--------------------------------|
| 12.33 | 15.62                          |
| 11.10 | 15.85                          |
| 9.86  | 14.83                          |
| 8.63  | 12.21                          |
| 7.40  | 11.85                          |
| 6.17  | 10.76                          |
| 7.70  | 12.32                          |
| 6.47  | 11.87                          |
| 5.24  | 9.59                           |
| 4.00  | 8.37                           |
| 2.77  | 7.57                           |
| 1.54  | 6.37                           |
| 12.33 | 14.28                          |
| 11.10 | 14.97                          |
| 9.86  | 14.34                          |
| 8.63  | 11.11                          |
| 7.40  | 10.59                          |
| 6.17  | 8.25                           |
| 7.70  | 11.52                          |
| 6.47  | 10.46                          |
| 5.24  | 8.37                           |
| 4.00  | 6.64                           |
| 2.77  | 5.53                           |
| 1.54  | 6.12                           |

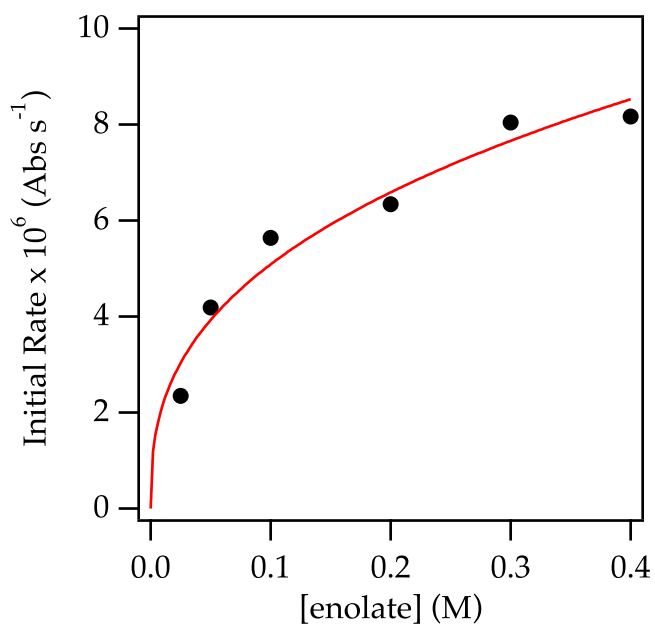

**Figure 39.** Plot of initial rate vs. [5] of a sample containing only tetramer (0.095 equiv LDA, 0.005 M cyclohexanone, 0.8 M THF, toluene, aged 10 minutes at 0 °C, recorded at -40 °C) The data was fit to  $y = ax^b$  such that  $b = 0.37 \pm 0.05$  corresponding to a fractional order dependence on 5.

| [5]   | Initial Rate x 10 <sup>6</sup> |
|-------|--------------------------------|
| 0.025 | 2.35                           |
| 0.05  | 4.19                           |
| 0.1   | 5.64                           |
| 0.2   | 6.34                           |
| 0.3   | 8.04                           |
| 0.4   | 8.17                           |

## Part 5: Computations Overview of Enolate 5

---

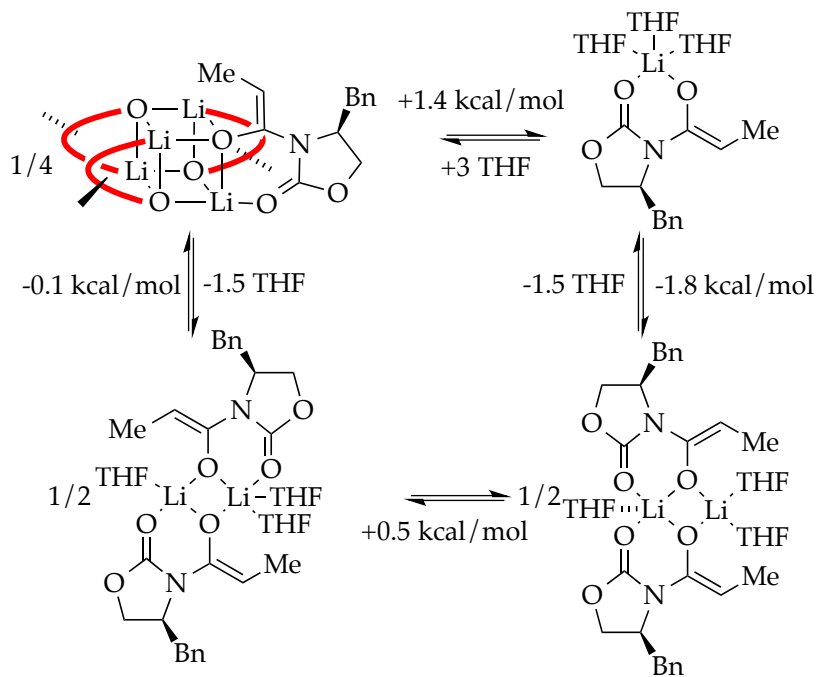

**Figure 40.** Overview of ground state energies, in kcal/mole of enolate

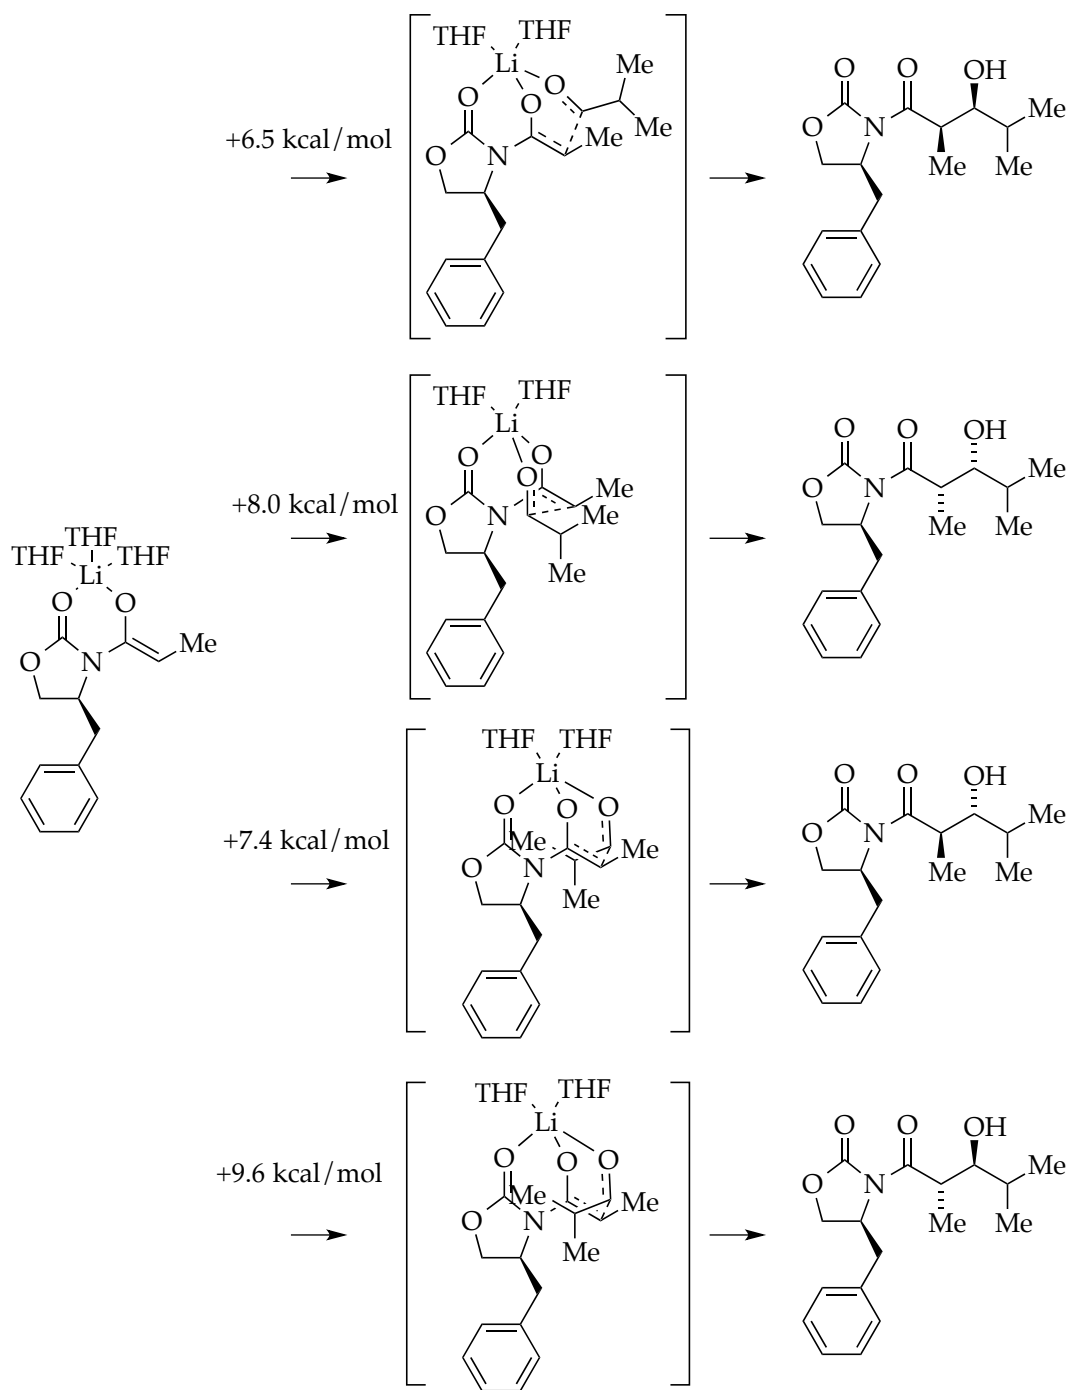

**Figure 41.** Overview of transition states from a monomer ground state.

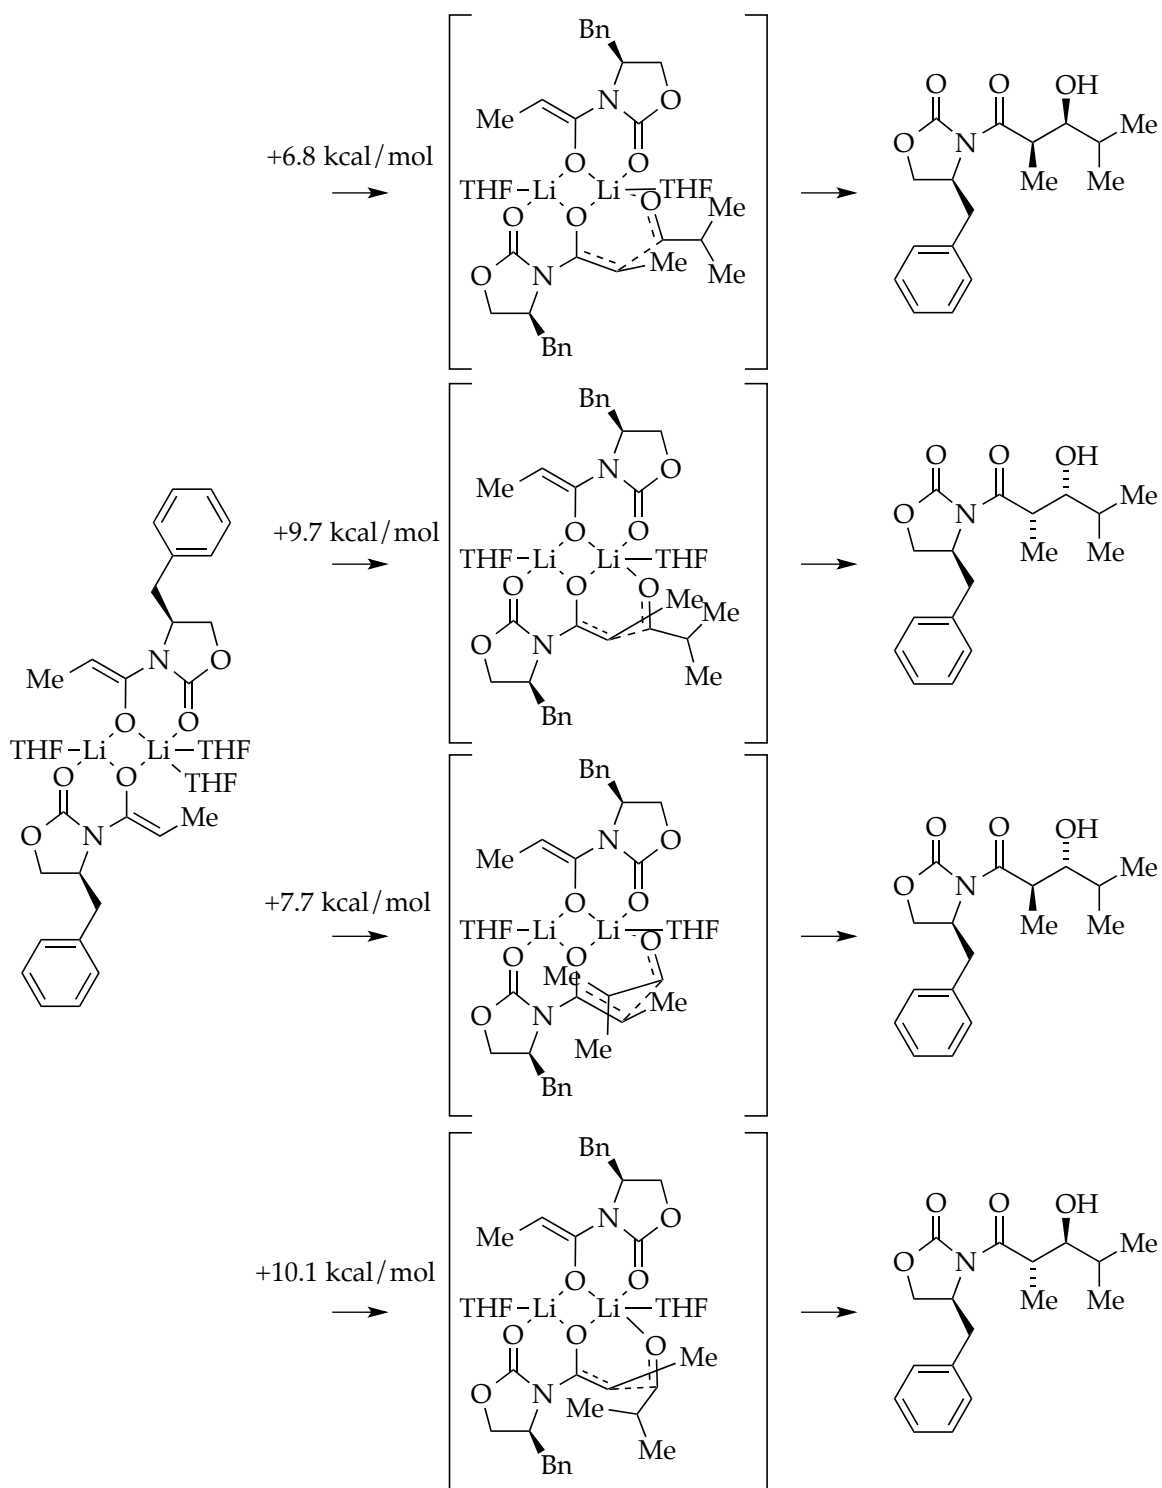

**Figure 42.** Overview of transition states from a dimer ground state.

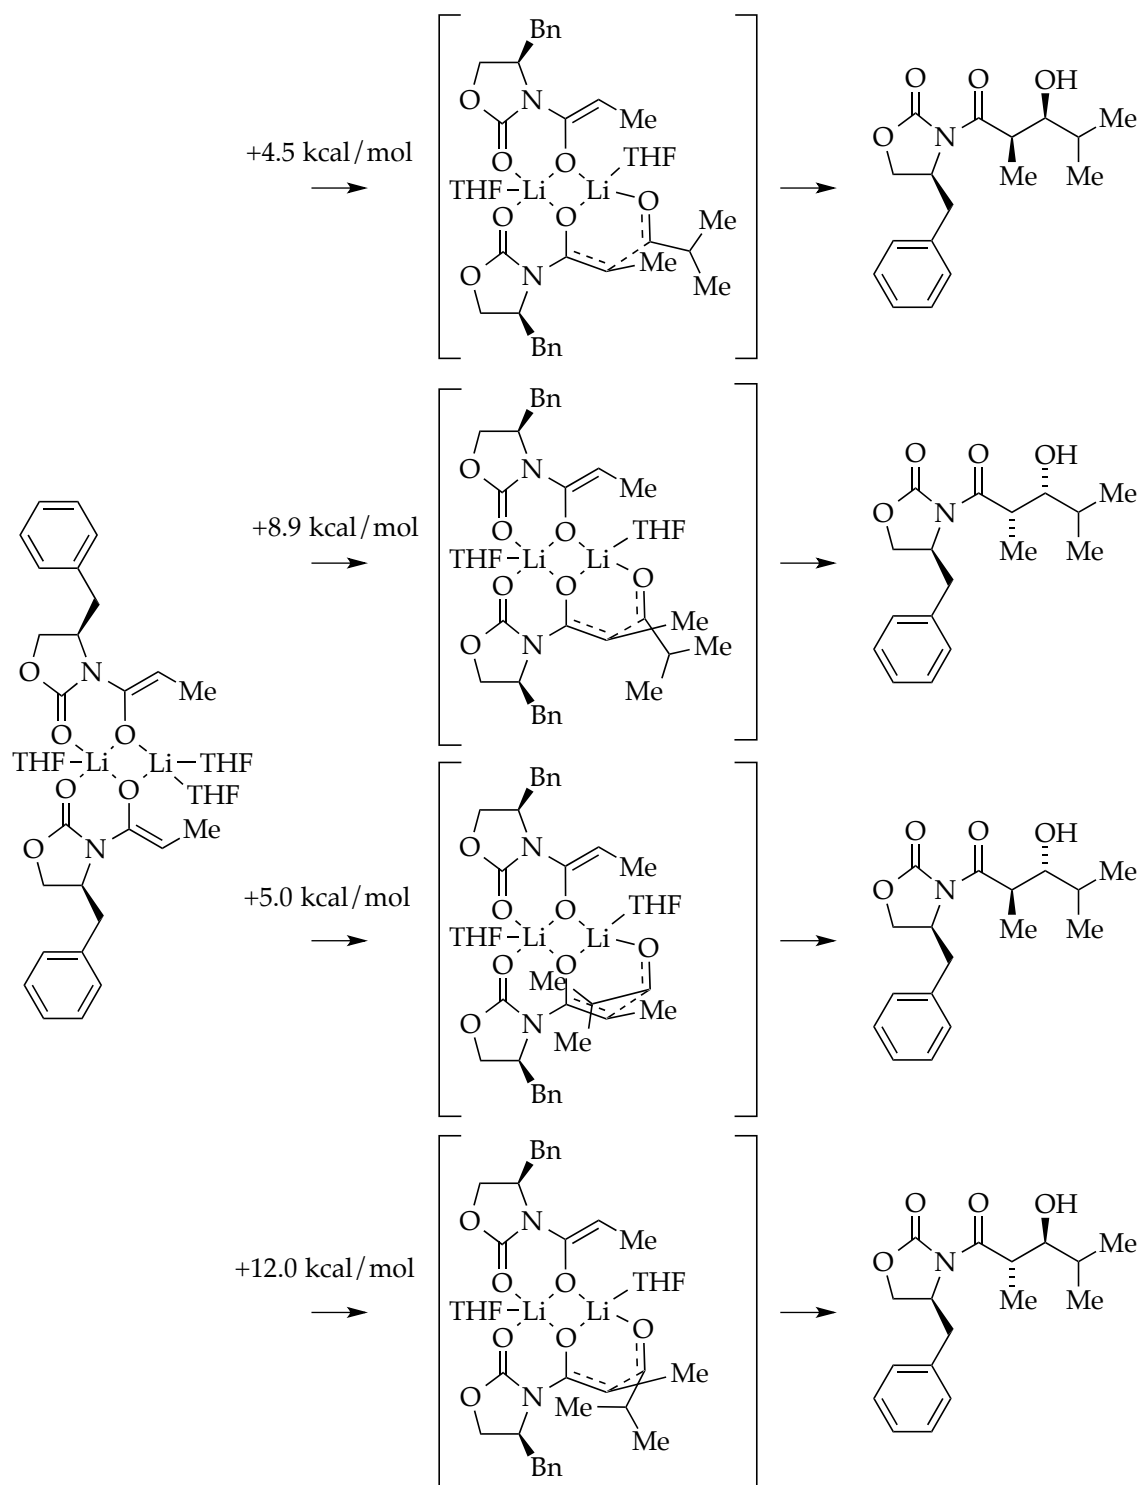

**Figure 43.** Overview of transition states from a spirocyclic dimer ground state.

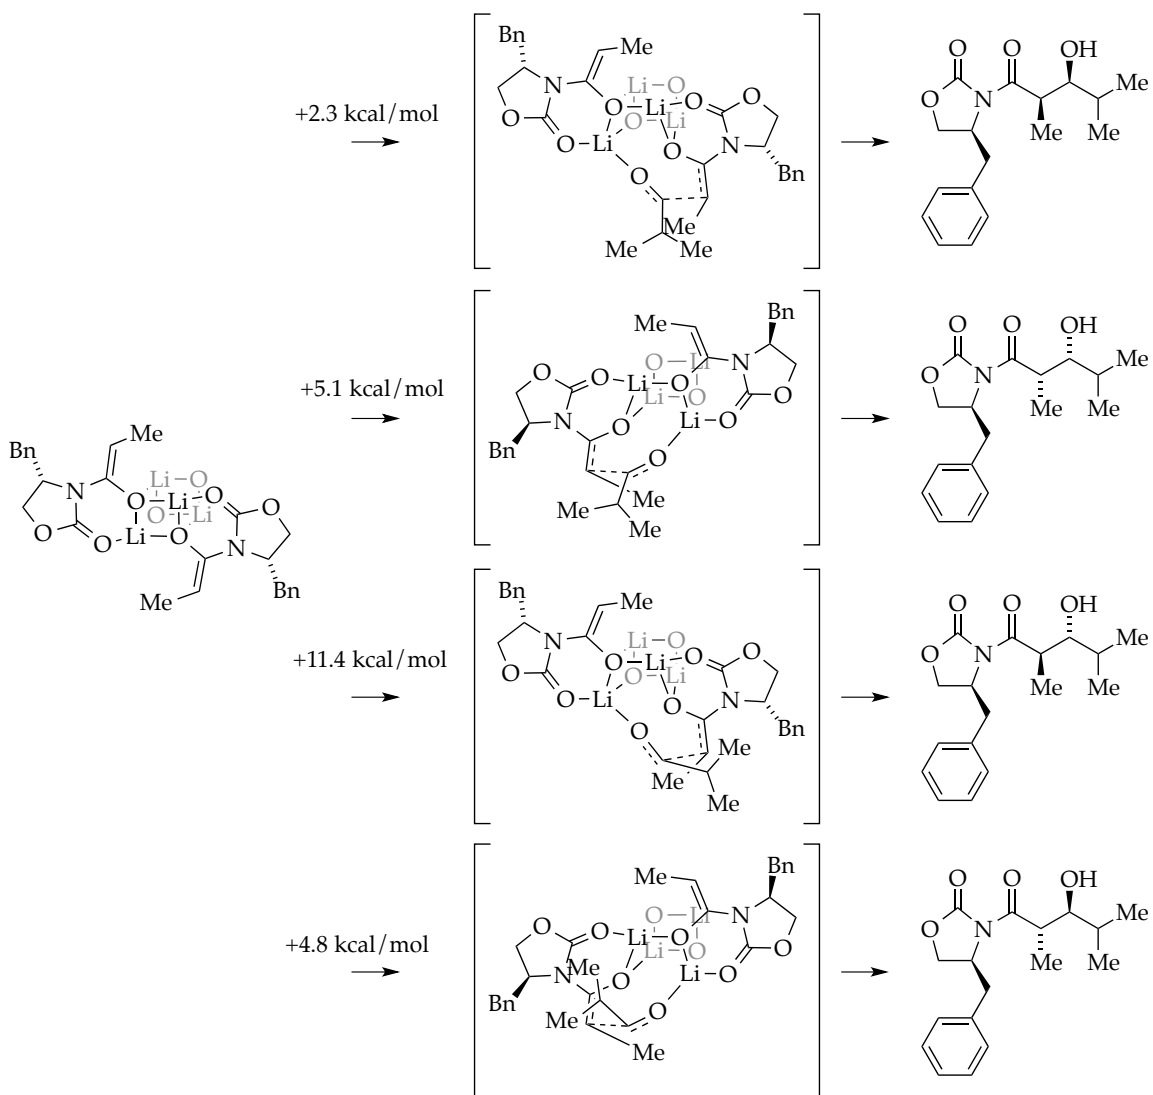

**Figure 44.** Overview of transition states from a tetramer ground state.



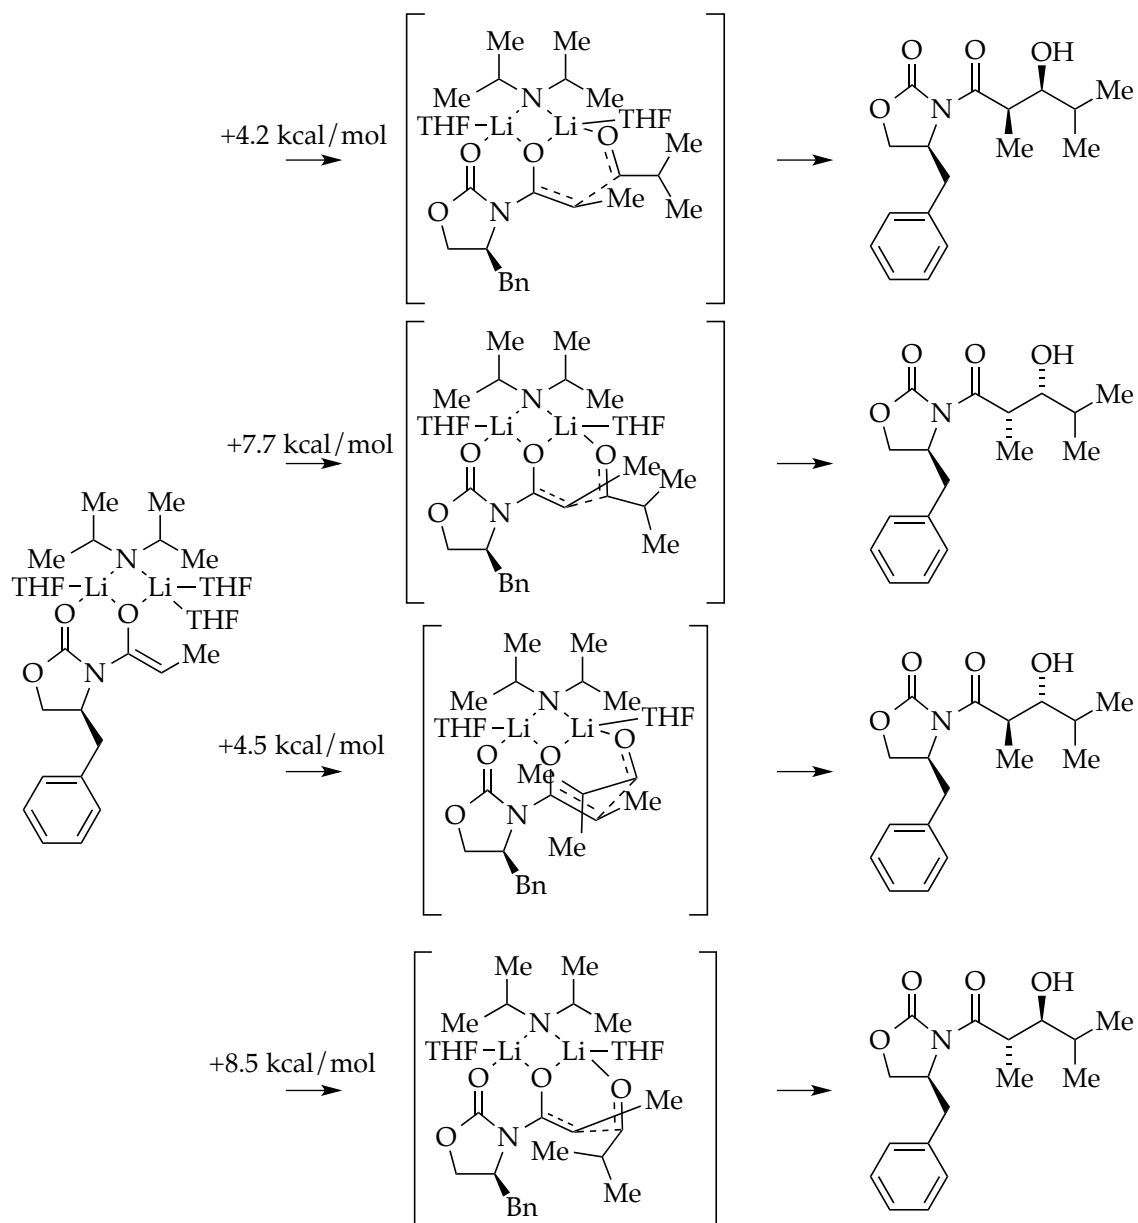

**Figure 45.** Overview of transition states from a LDA 5 mixed dimer ground state.

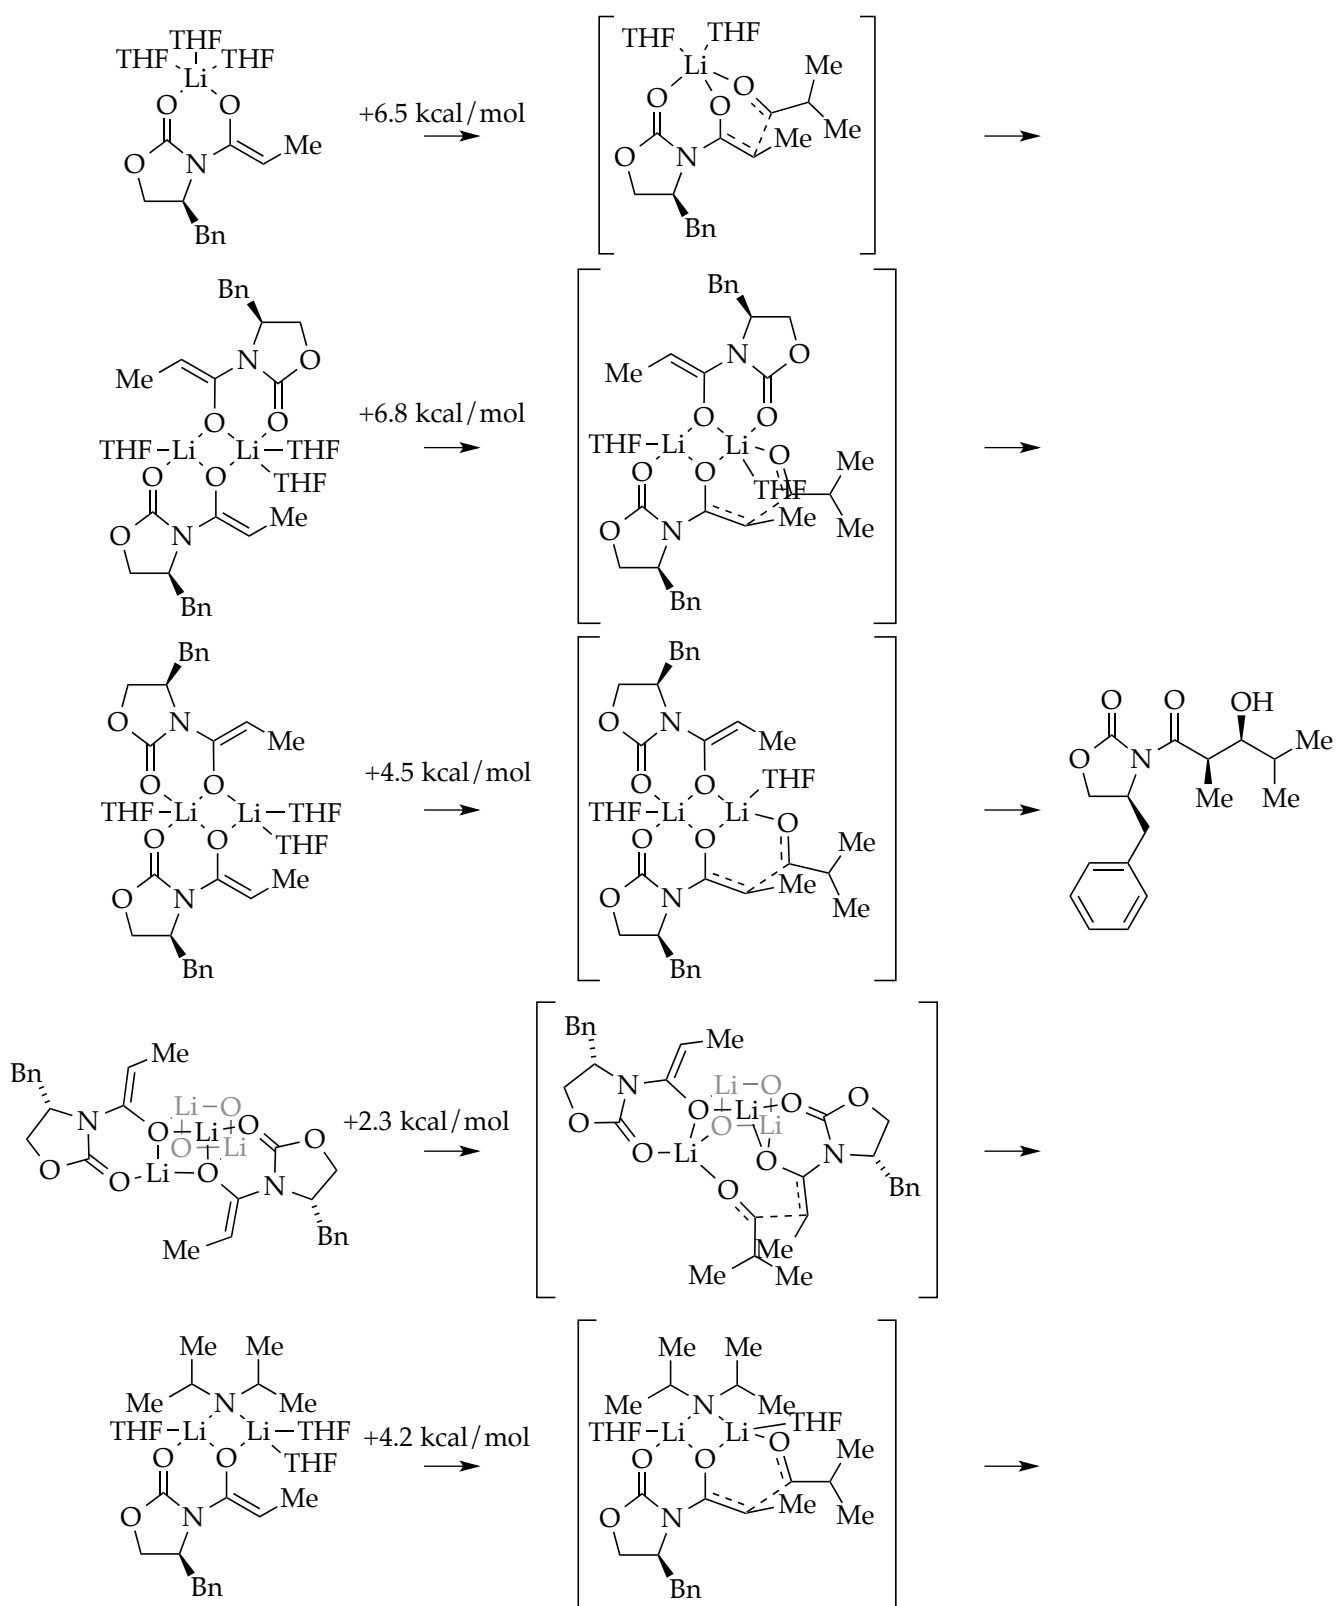

**Figure 46.** Overview of transition state energies leading to (*R,S*)-6

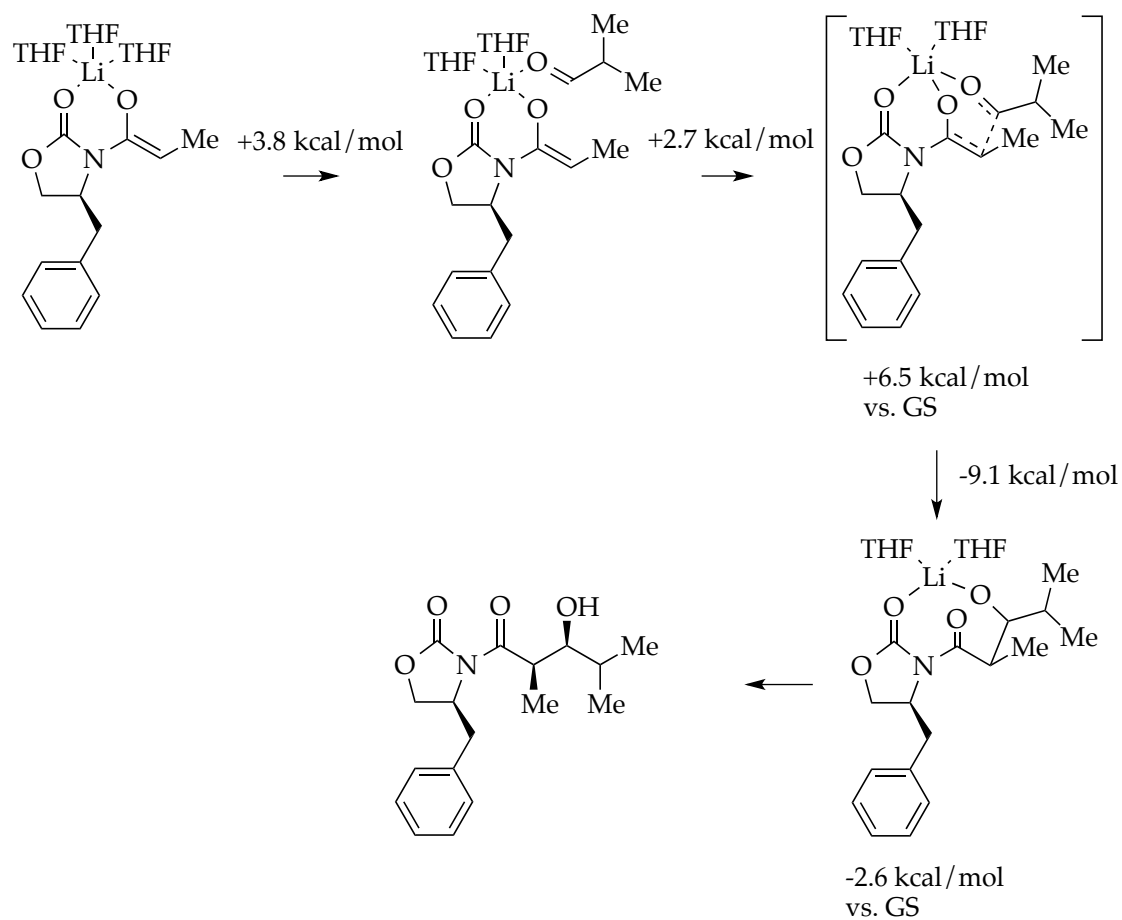

**Figure 47.** Computational overview of the pathway from monomer to (R,S)-6.

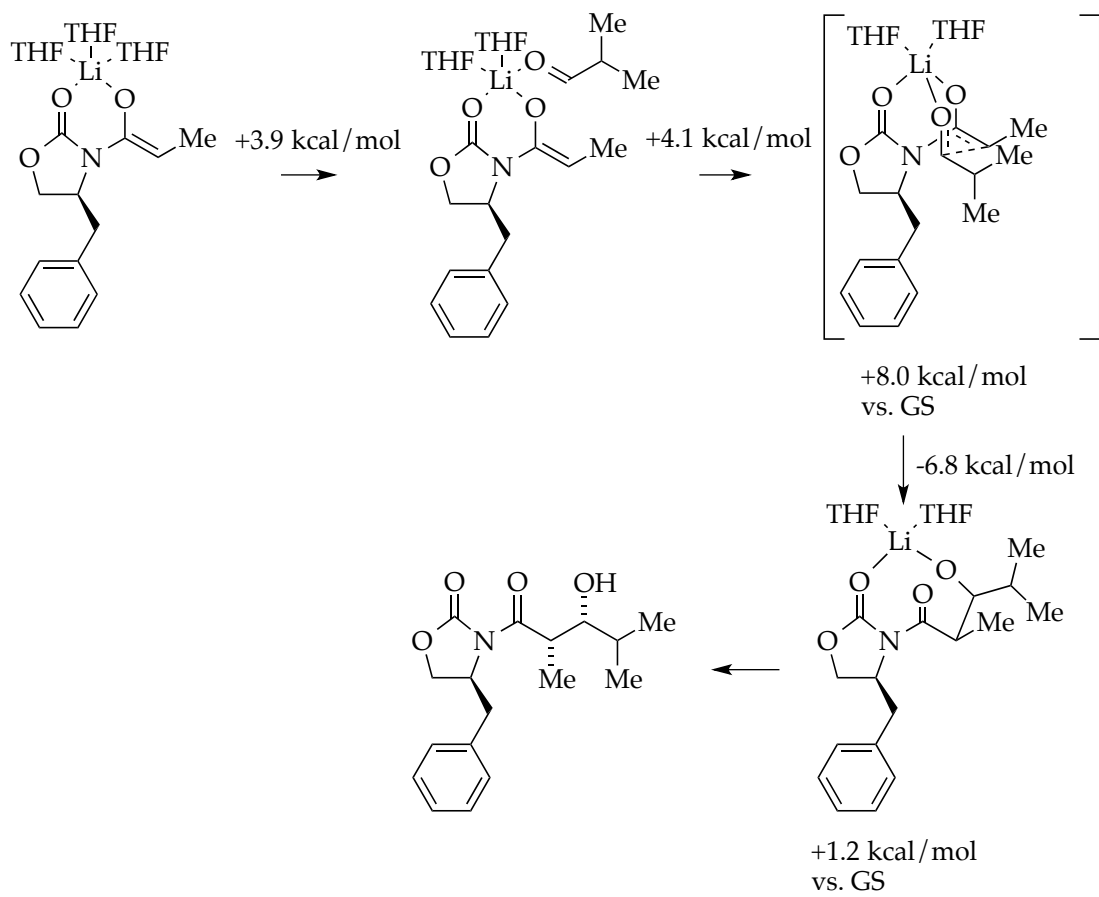

**Figure 48.** Computational overview of the pathway from monomer to (*S,R*)-6.

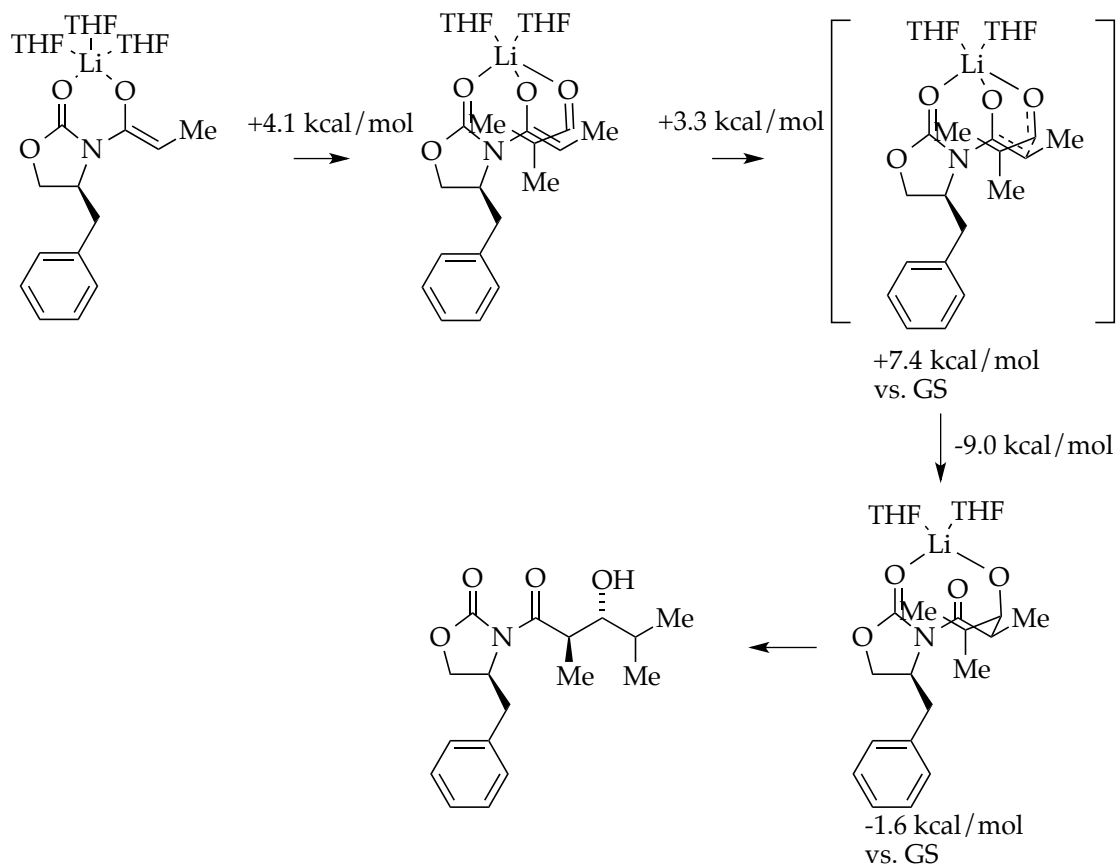

**Figure 49.** Computational overview of the pathway from monomer to  $(R,R)$ -6.

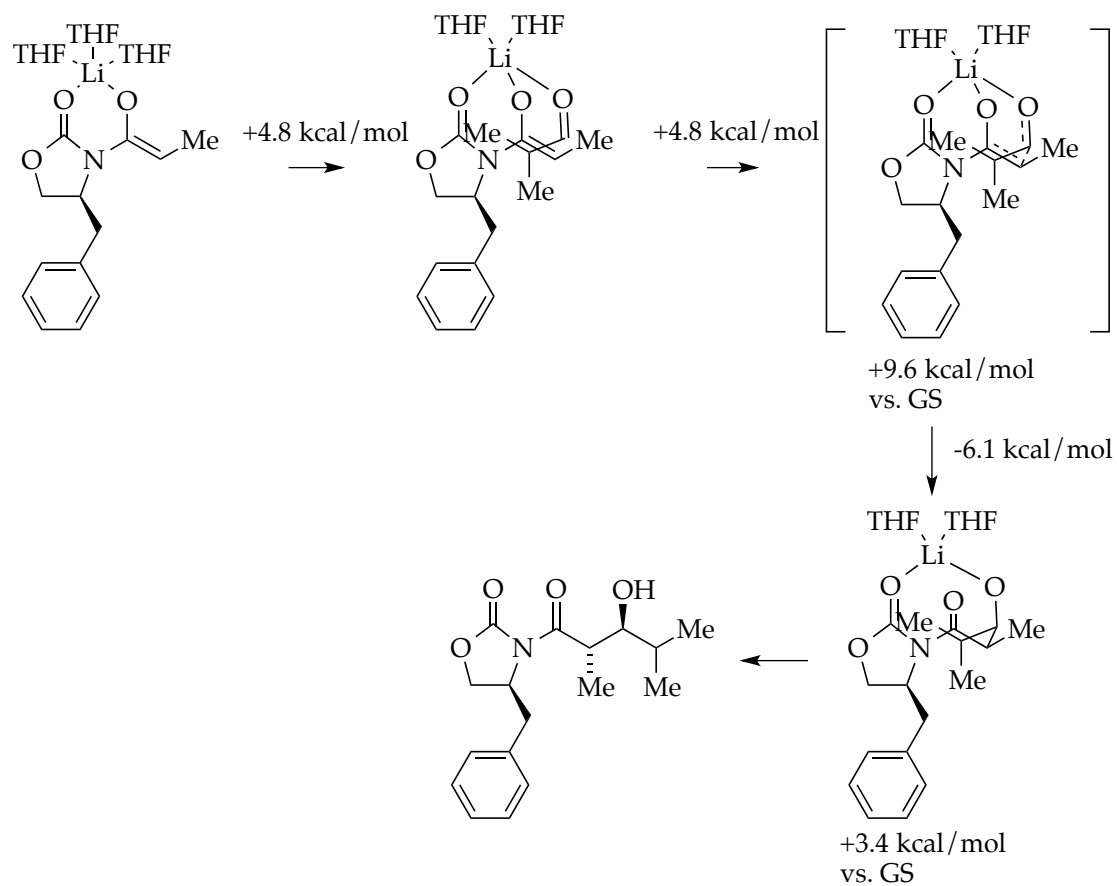

**Figure 50.** Computational overview of the pathway from monomer to *(S,S)*-6.

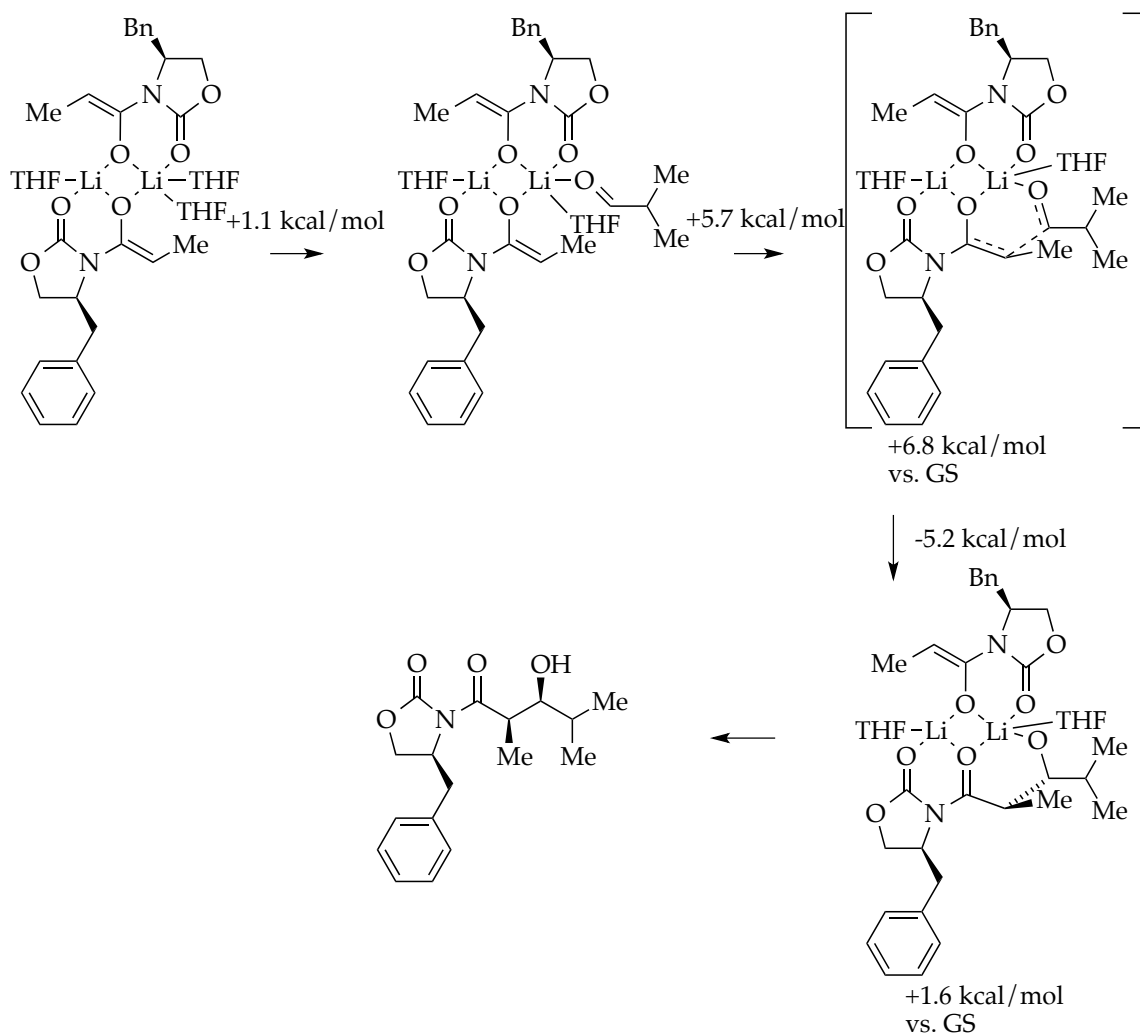

**Figure 51.** Computational overview of the pathway from dimer to *(R,S)*-6.

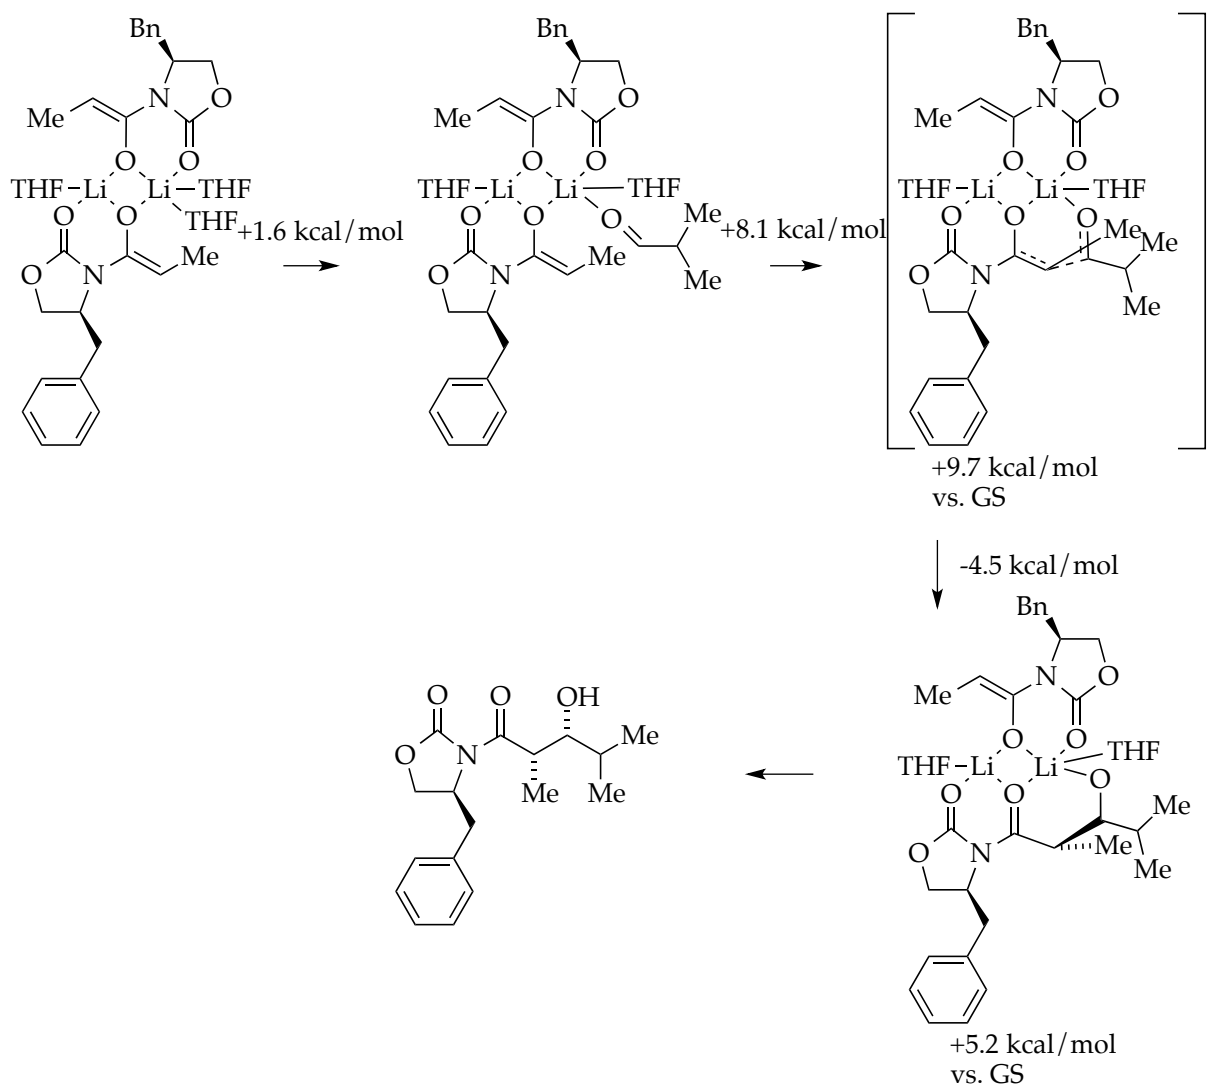

**Figure 52.** Computational overview of the pathway from dimer to *(S,R)*-6.



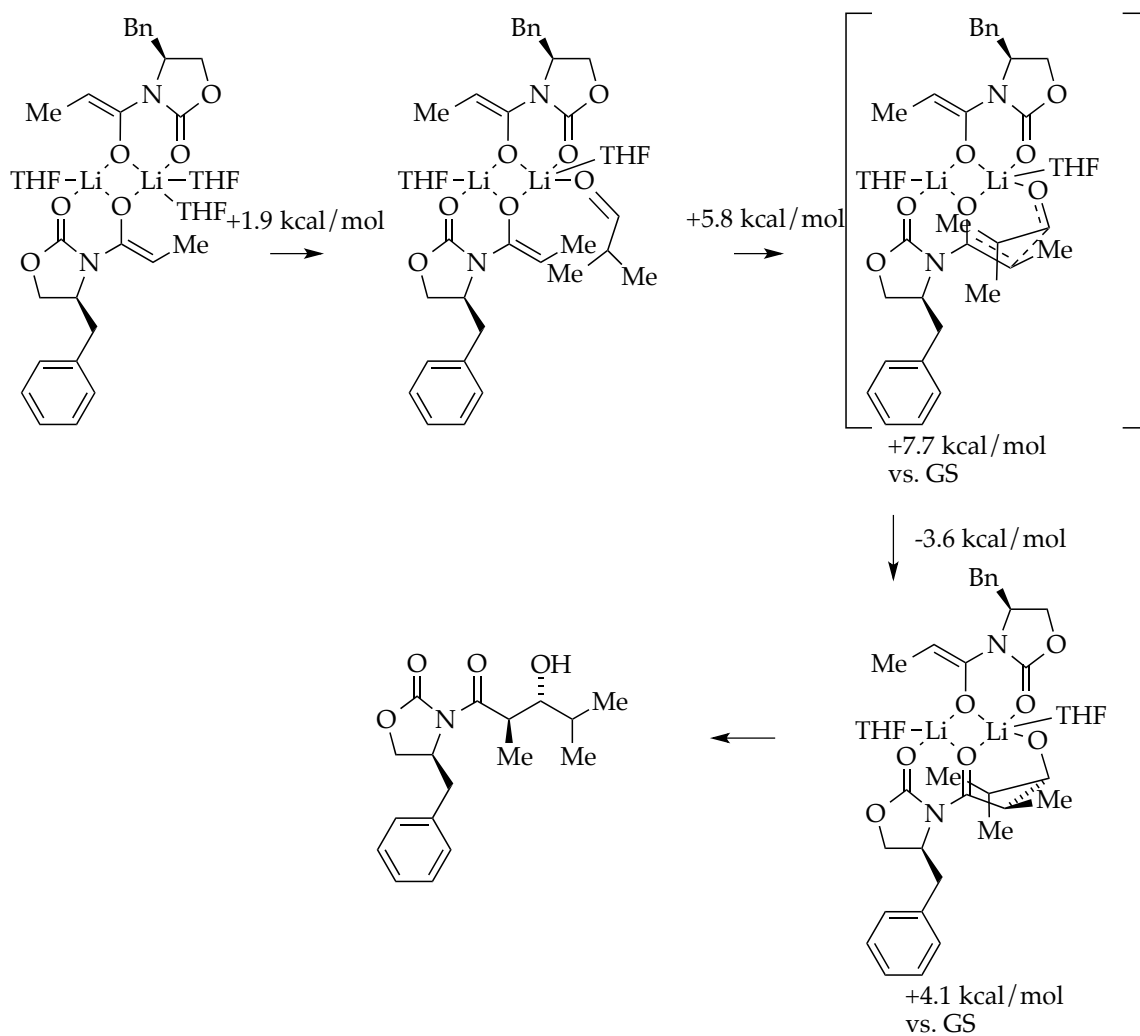

**Figure 53.** Computational overview of the pathway from dimer to *(R,R)*-6.

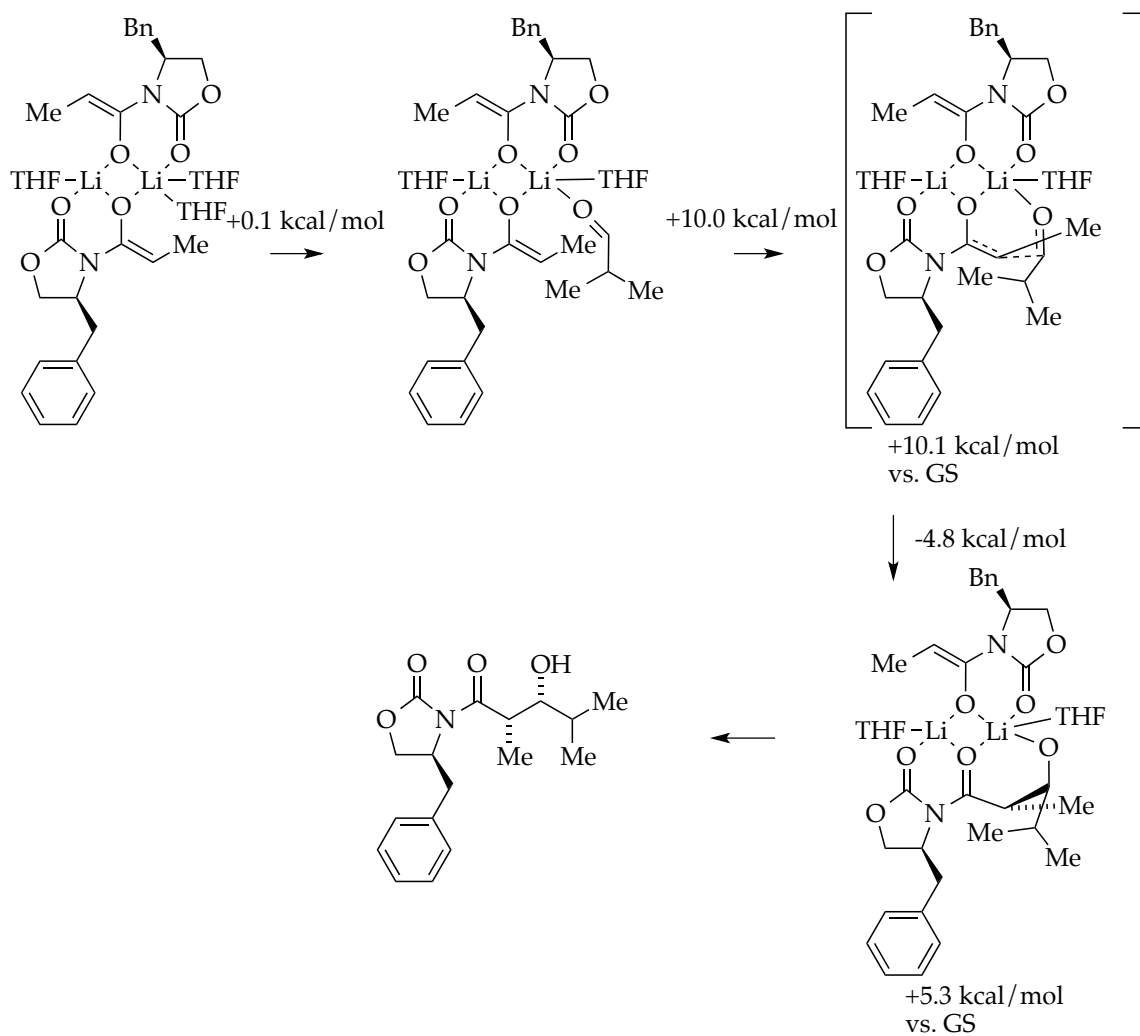

**Figure 54.** Computational overview of the pathway from dimer to (S,S)-6.

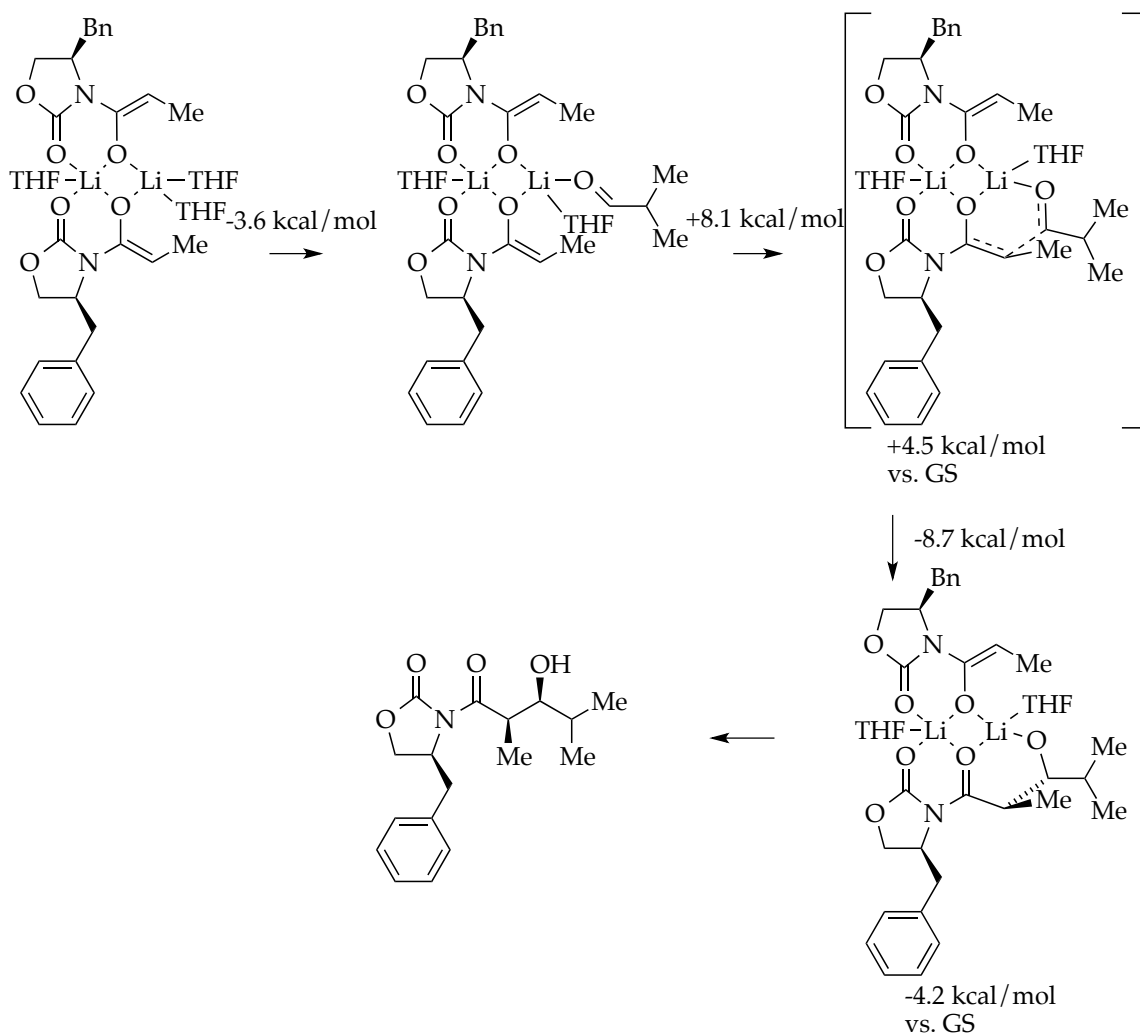

**Figure 55.** Computational overview of the pathway from spirocyclic dimer to *(R,S)*-6.

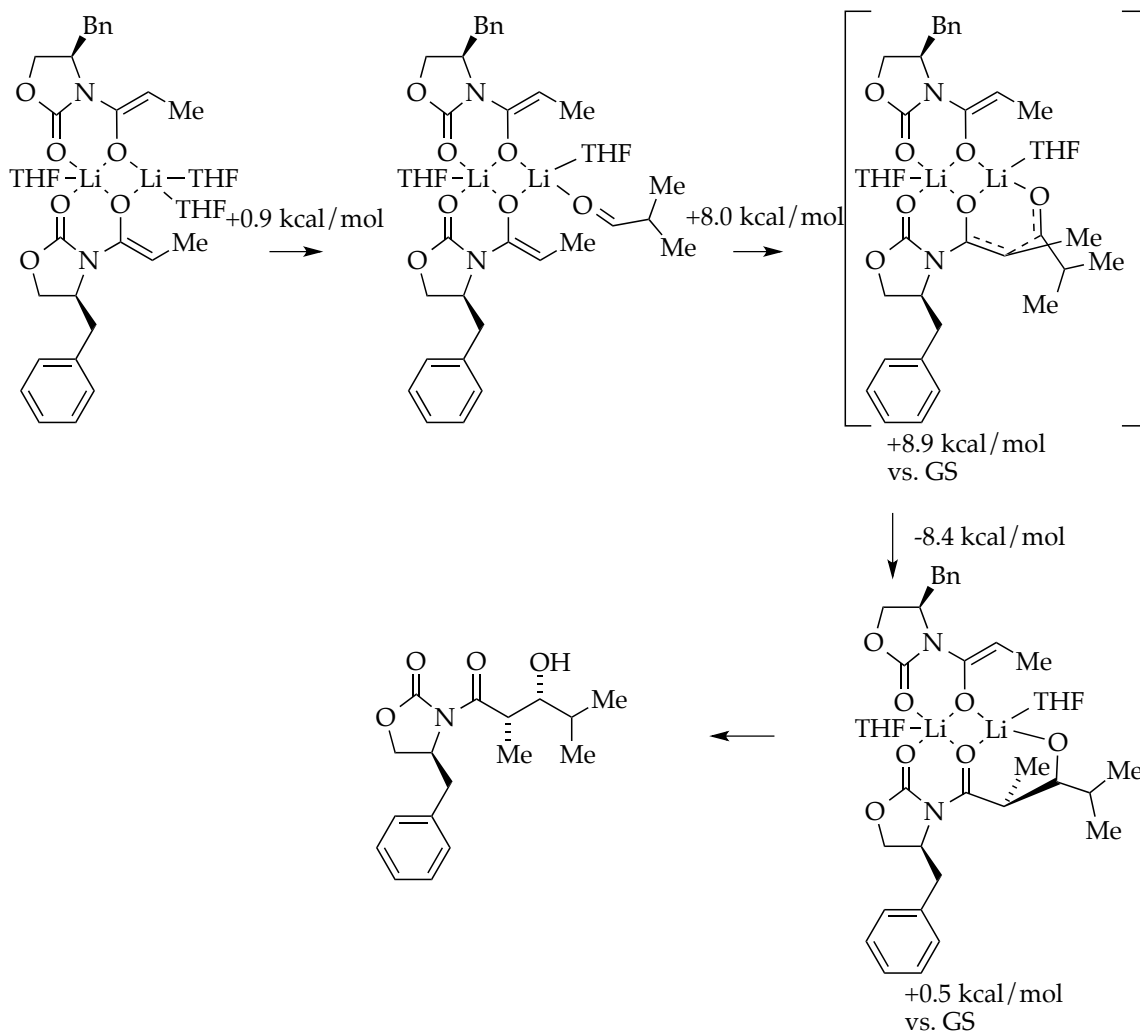

**Figure 56.** Computational overview of the pathway from spirocyclic dimer to *(S,R)*-6.

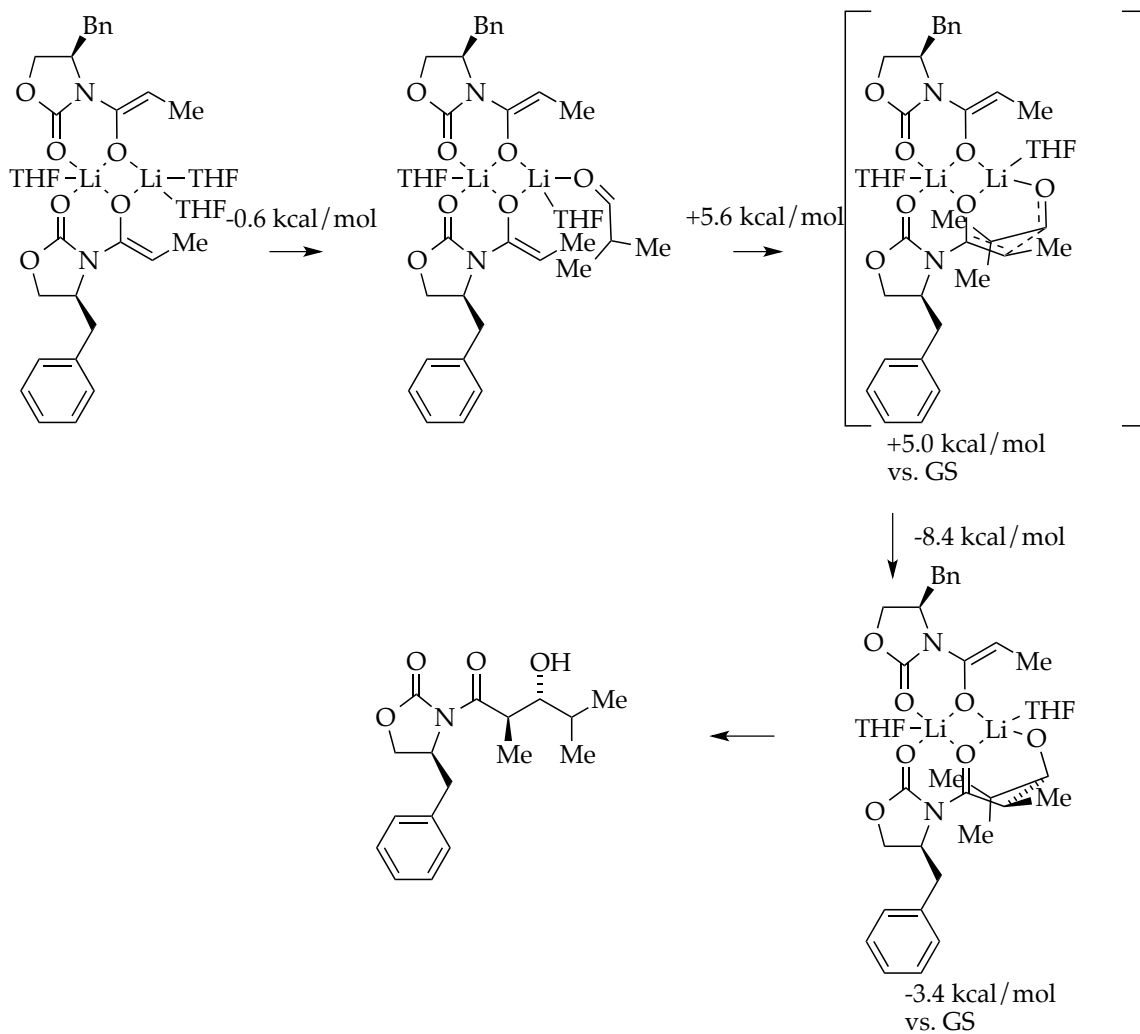

**Figure 57.** Computational overview of the pathway from spirocyclic dimer to *(R,R)*-6.

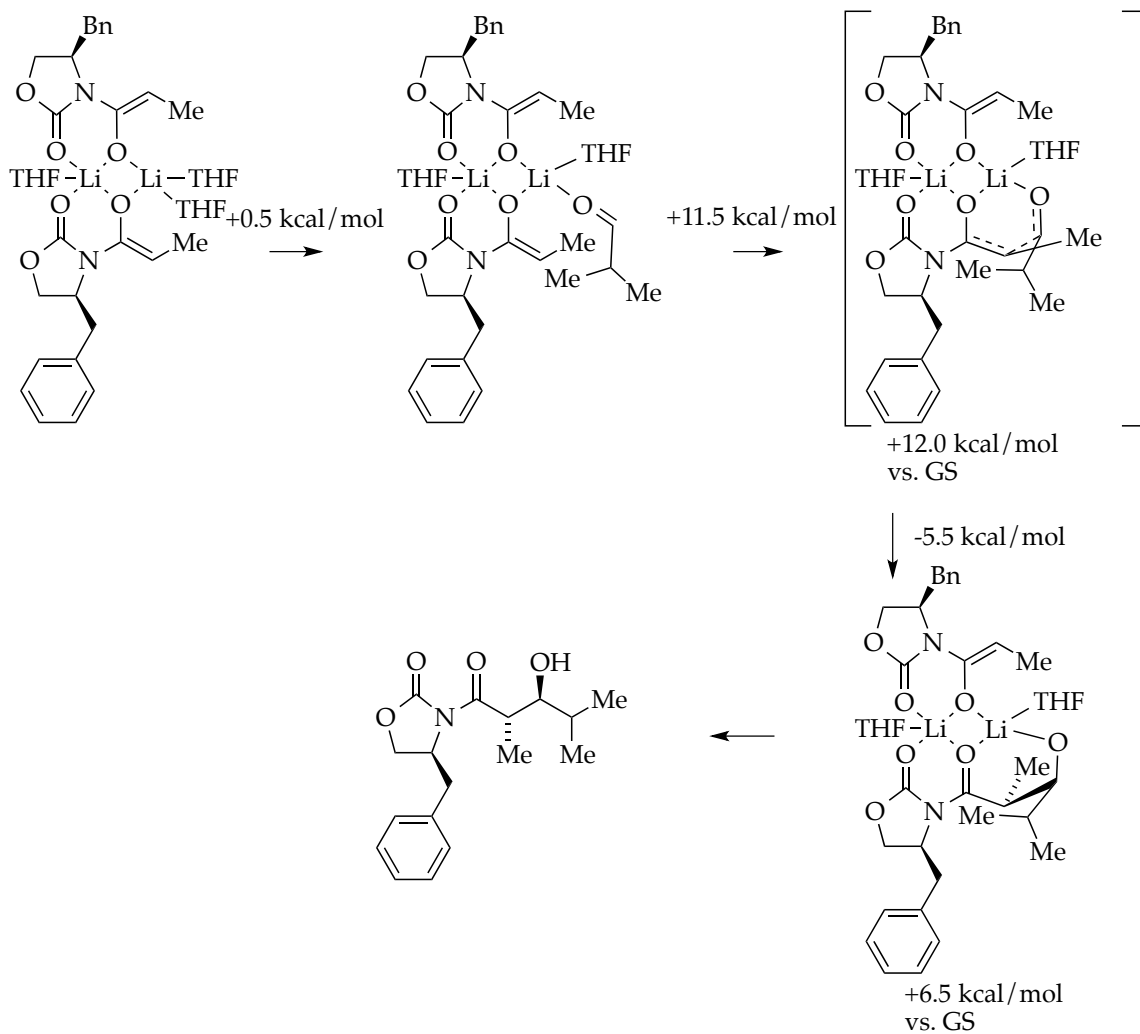

**Figure 58.** Computational overview of the pathway from spirocyclic dimer to  $(S,S)$ -6.

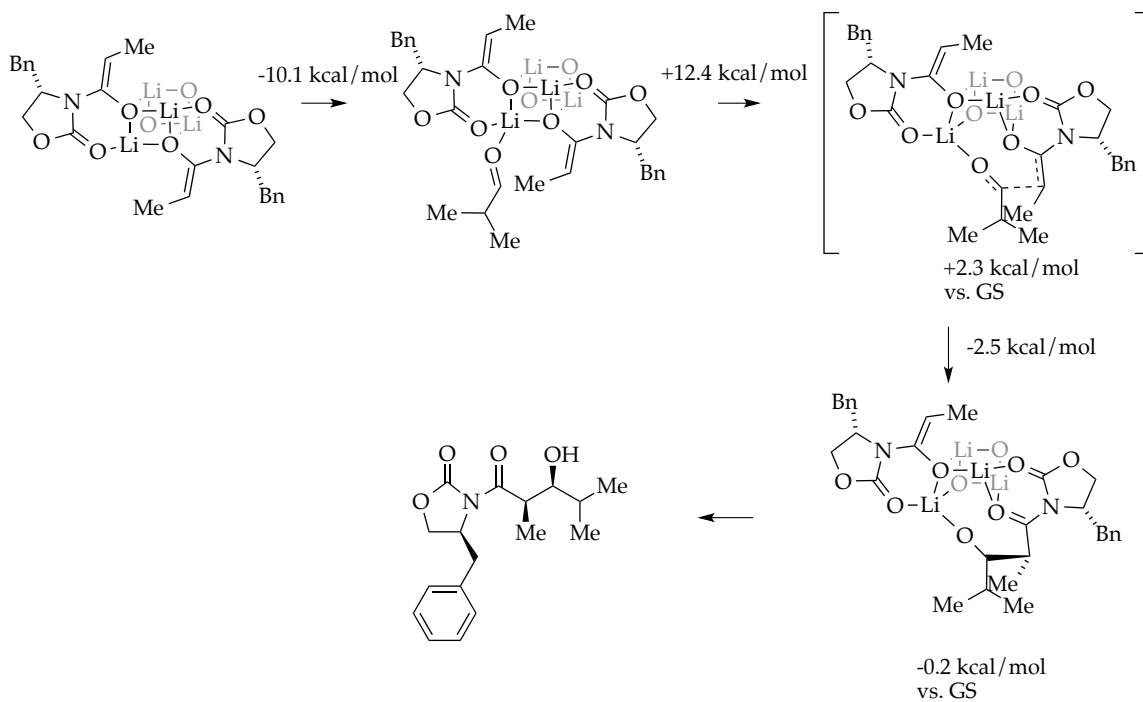

**Figure 59.** Computational overview of the pathway from tetramer to (*R,S*)-6.

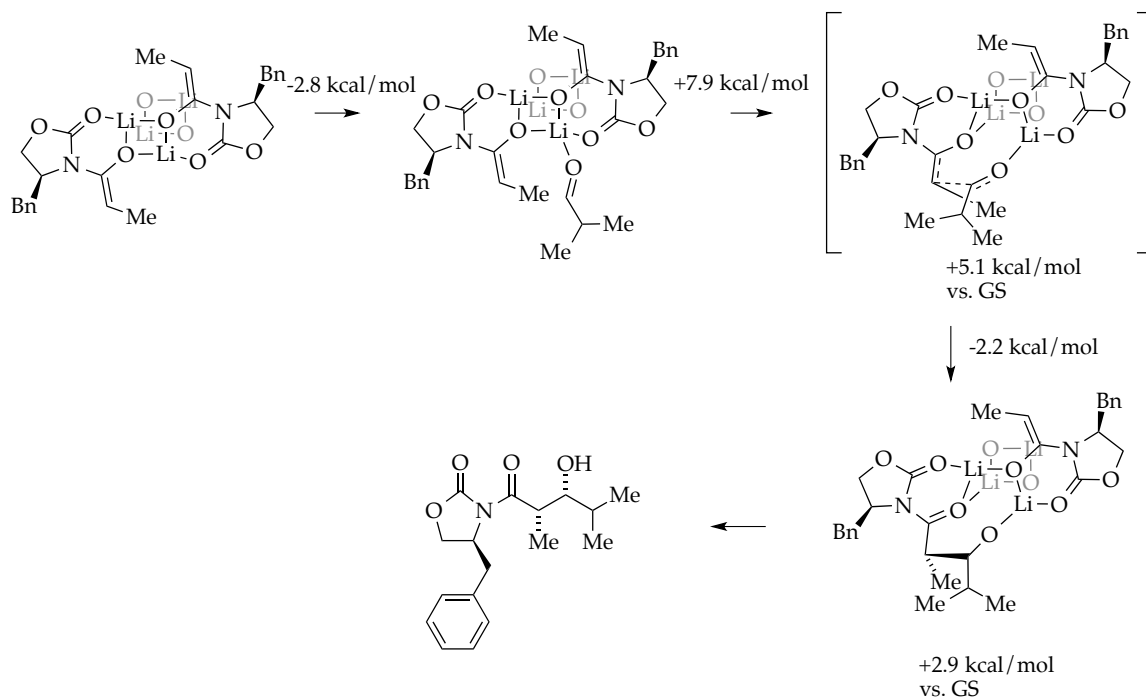

**Figure 60.** Computational overview of the pathway from tetramer to *(S,R)*-6.



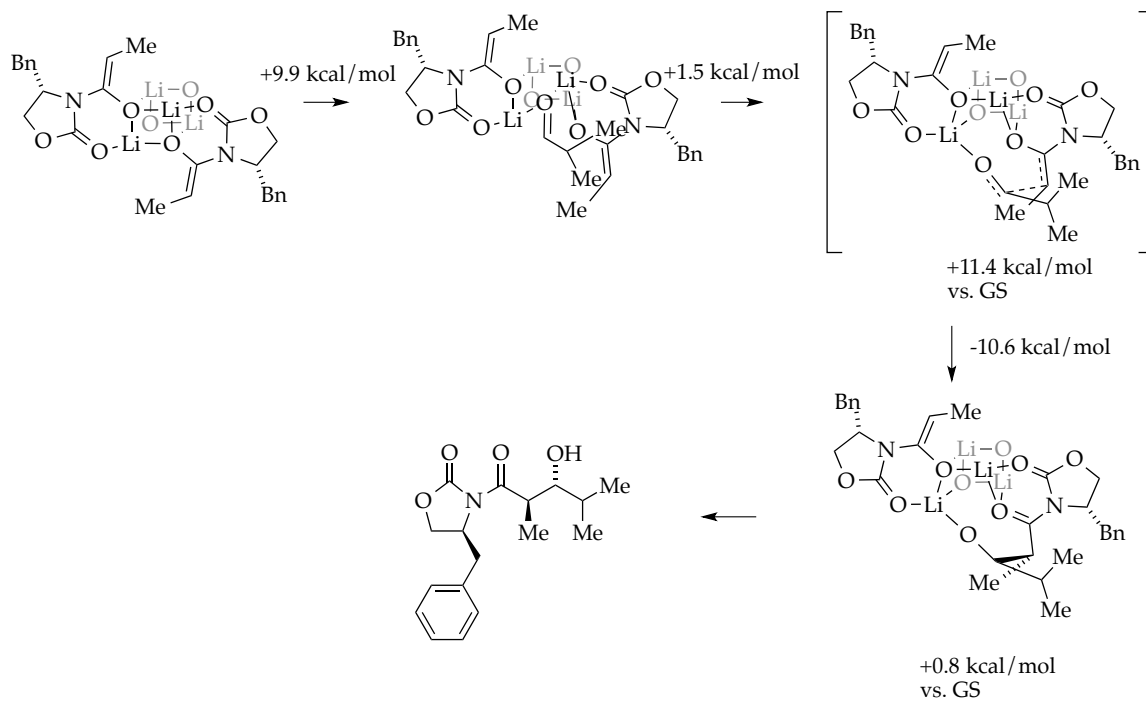

**Figure 61.** Computational overview of the pathway from tetramer to *(R,R)*-6.

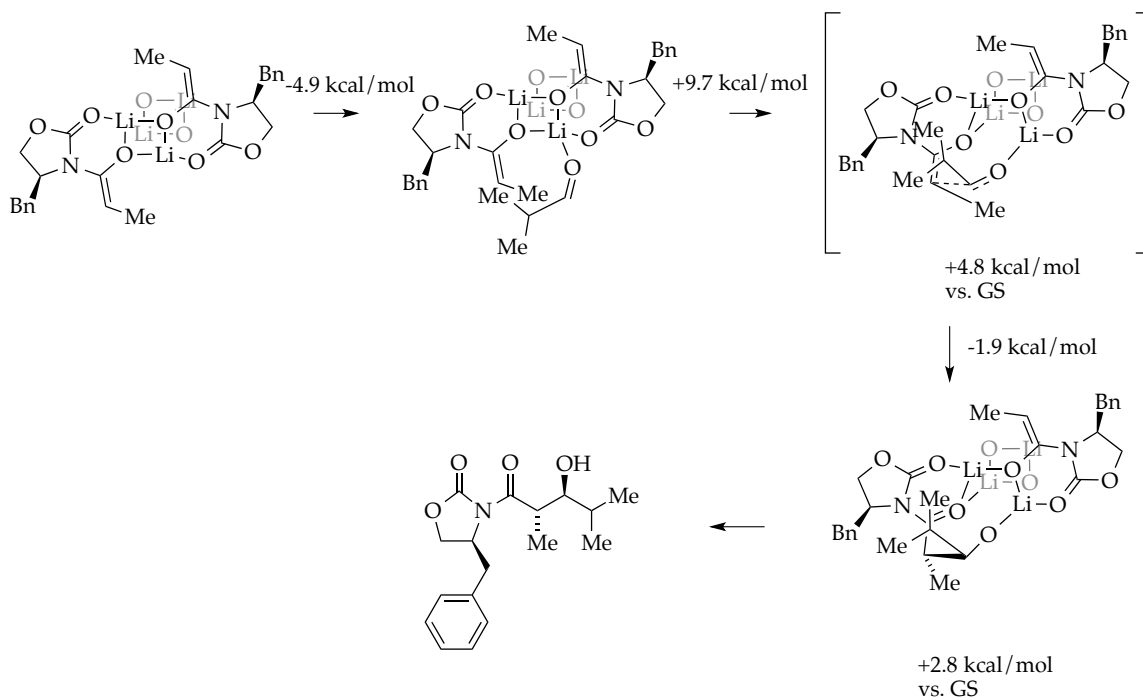

**Figure 62.** Computational overview of the pathway from tetramer to *(S,S)*-6.

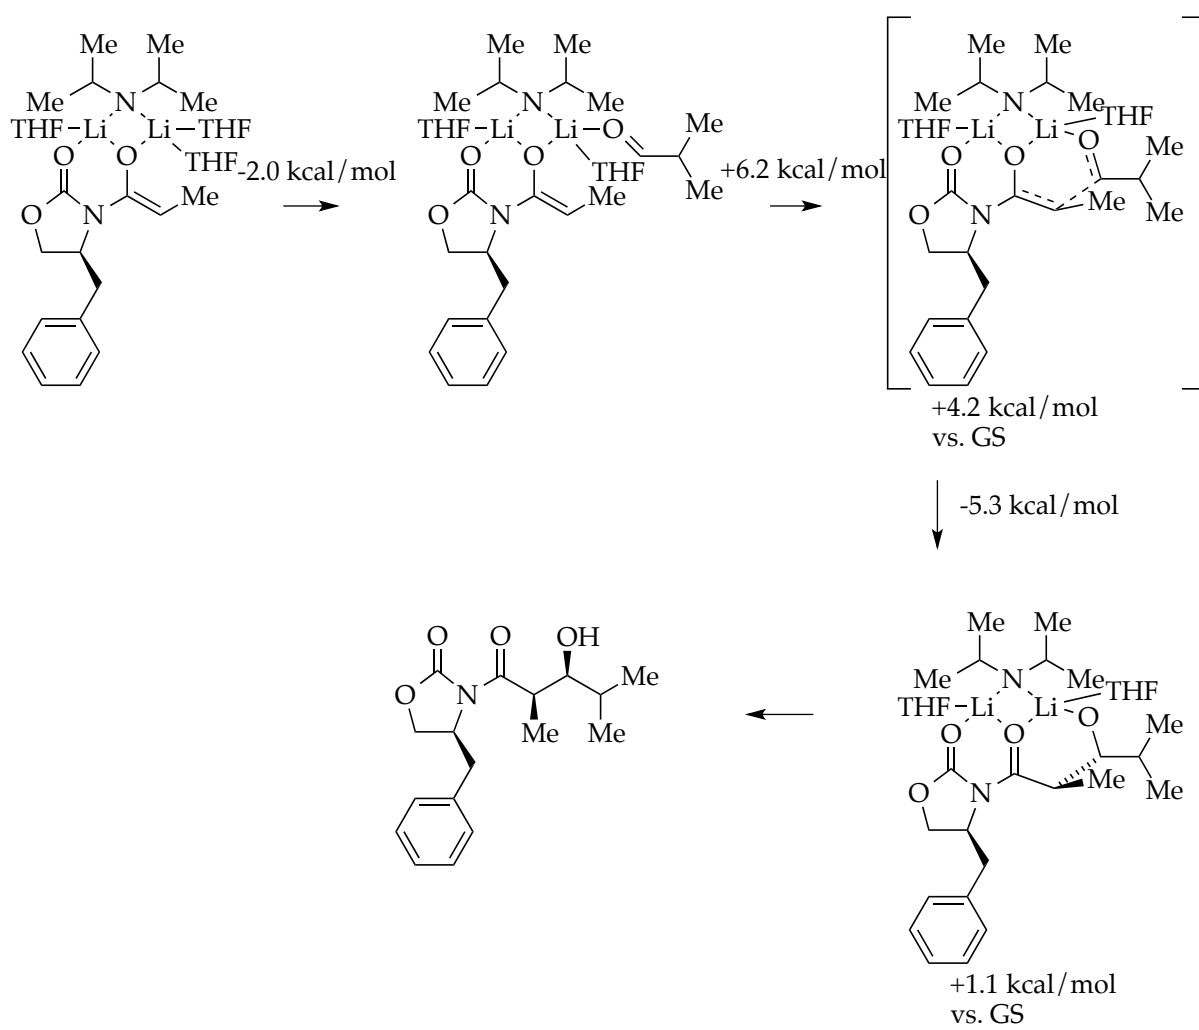

**Figure 63.** Computational overview of the pathway from LDA 5 mixed dimer to (R,S)-6.

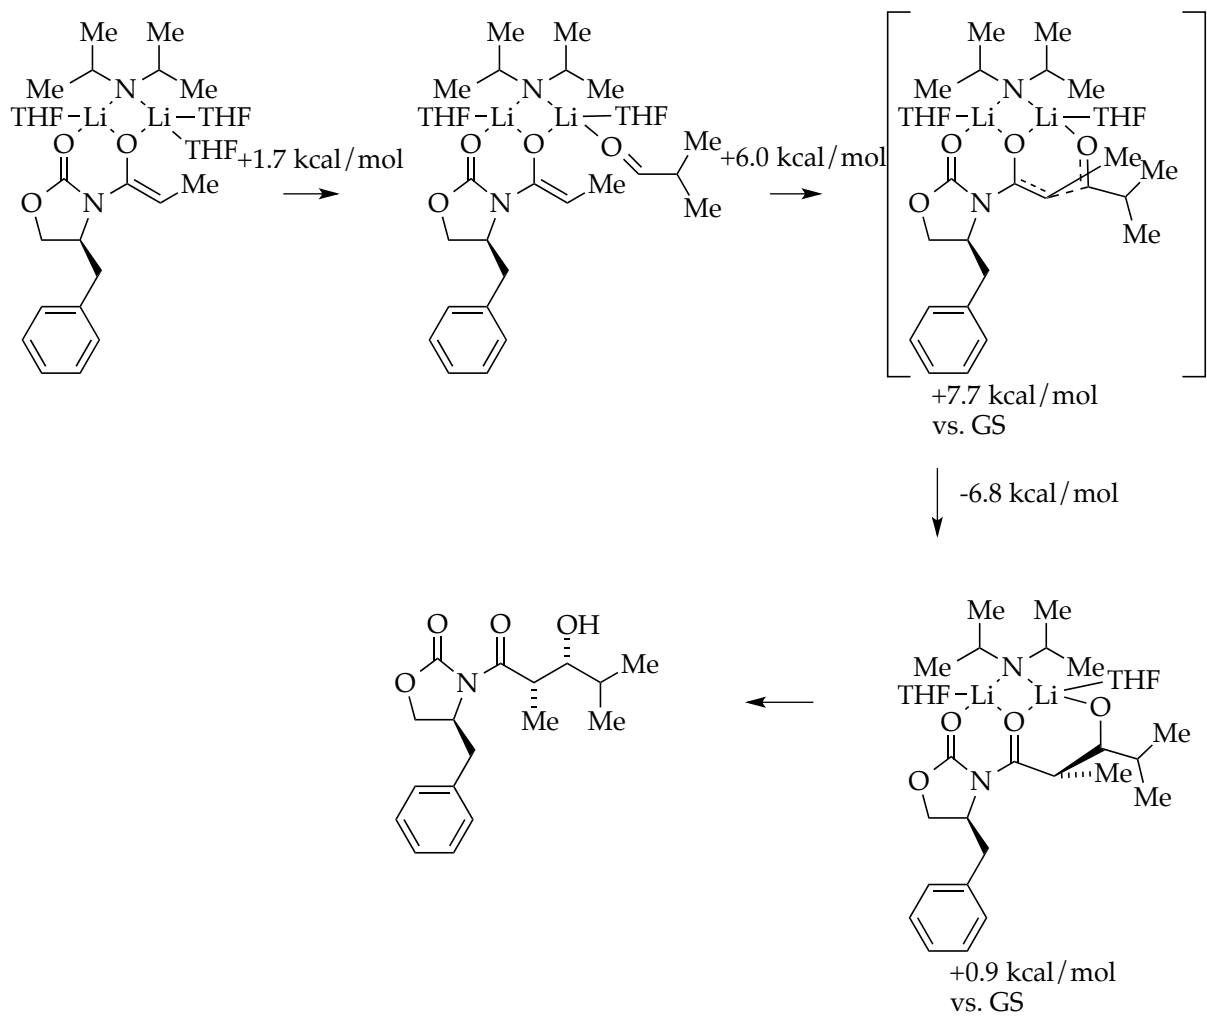

**Figure 64.** Computational overview of the pathway from LDA 5 mixed dimer to  $(S,R)$ -6.

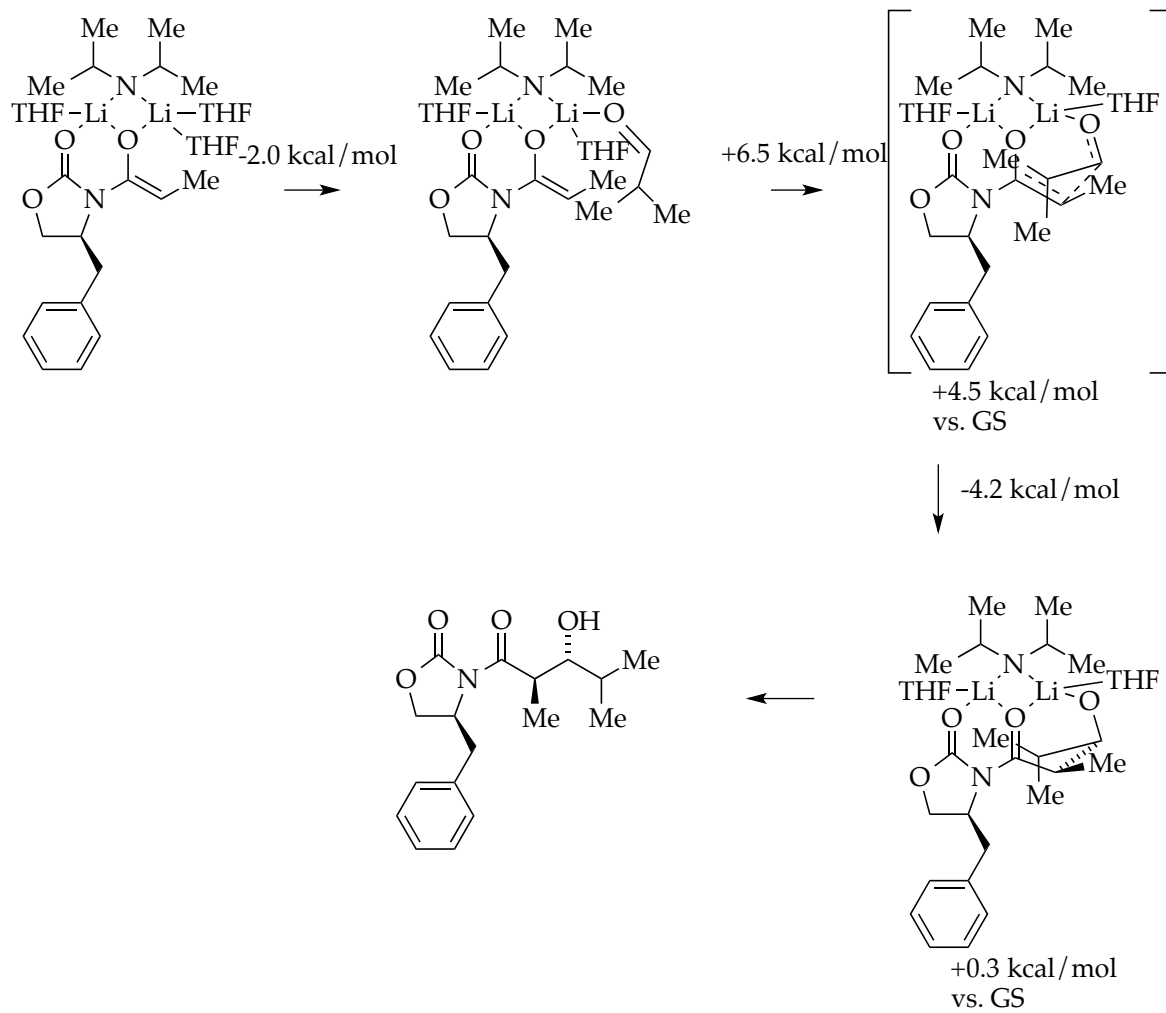

**Figure 65.** Computational overview of the pathway from LDA 5 mixed dimer to *(R,R)*-6.

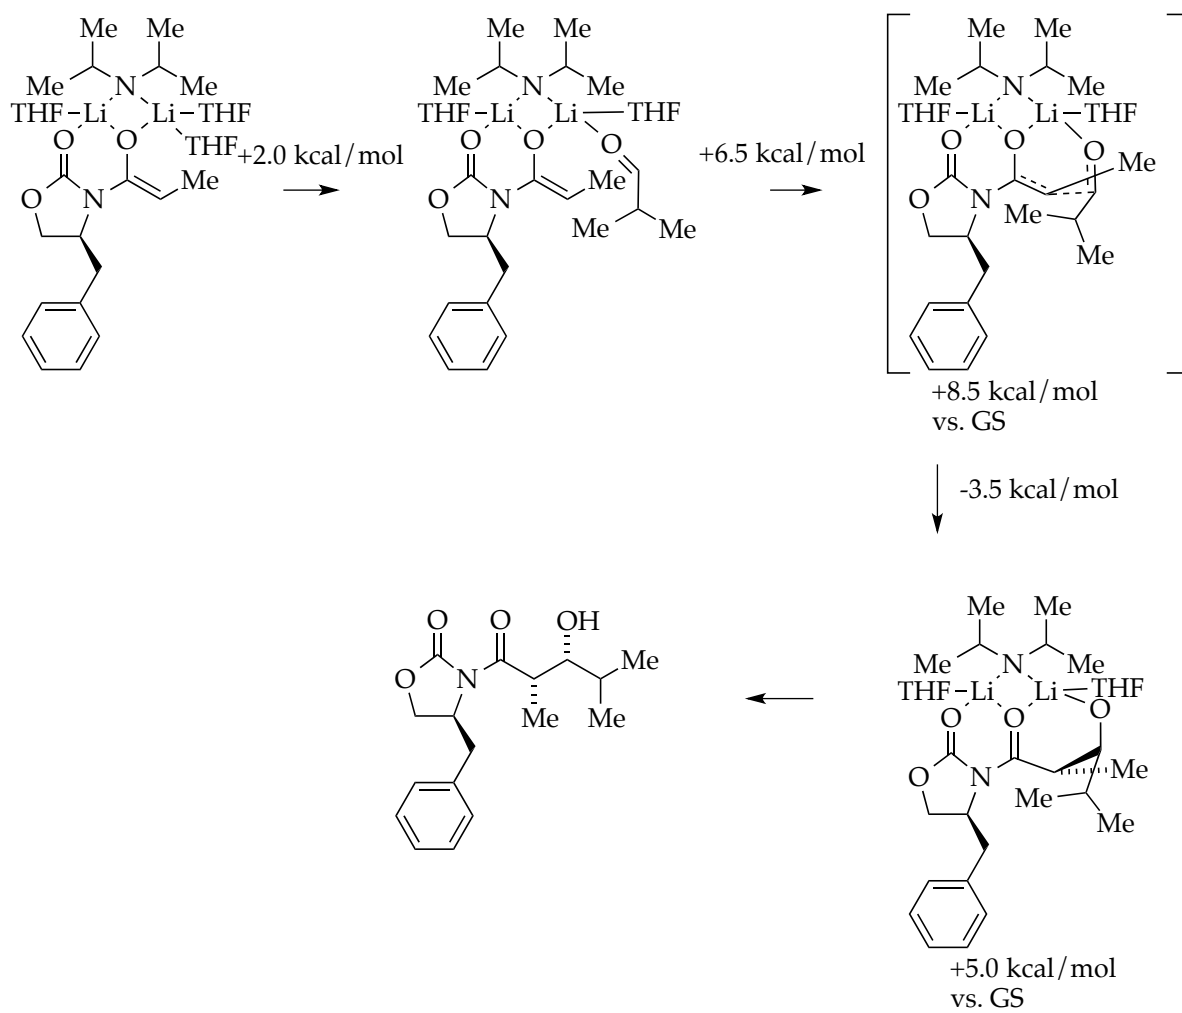

**Figure 66.** Computational overview of the pathway from LDA 5 mixed dimer to  $(S,S)$ -6.

## Part 6: General Computations

---

Geometries are optimized at the B3LYP level of theory using the 6-31G(d) basis set. Energies are defined as follows:  $G$  is the sum of electronic and thermal free energies calculated at the B3LYP level of theory ( $T = 195$  K).  $G_{\text{MP2}}$  is derived from an MP2 SP calculation corresponding to the DFT-optimized geometry and includes a thermal correction from the DFT calculation.

**Table 5.** Geometric coordinates and thermally corrected MP2 energies for tetrahydrofuran (THF)

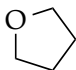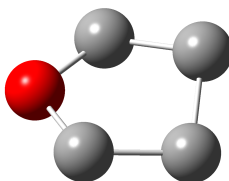

$G = -232.349382$  Hartree  
 $G_{\text{MP2}} = -145312.2903$  kcal/mol

| Atom | X           | Y           | Z           |
|------|-------------|-------------|-------------|
| C    | 0.00000000  | 0.00000000  | 0.00000000  |
| O    | 0.00000000  | 0.00000000  | 1.43133070  |
| C    | 1.34537191  | 0.00000000  | 1.92150203  |
| C    | 2.24870259  | -0.28439627 | 0.71435321  |
| C    | 1.43346820  | 0.33130215  | -0.43248249 |
| H    | 1.58213073  | 1.41736875  | -0.46518645 |
| H    | 1.68560870  | -0.07569023 | -1.41670971 |
| H    | 3.24887201  | 0.14691464  | 0.82158362  |
| H    | 2.35937654  | -1.36515207 | 0.56460786  |
| H    | 1.57260400  | 0.98256813  | 2.36334488  |
| H    | 1.43285191  | -0.75428594 | 2.71251317  |
| H    | -0.30387867 | -0.99259206 | -0.36803060 |
| H    | -0.73798112 | 0.73090835  | -0.35071740 |

**Table 6.** Geometric coordinates and thermally corrected MP2 energies for isobutyraldehyde

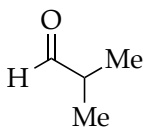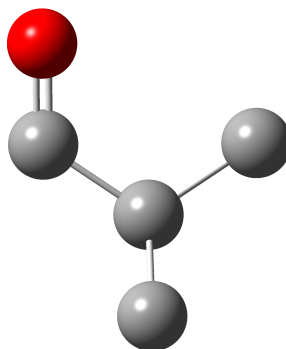

G = -232.363544 Hartree  
G<sub>MP2</sub> = -145322.0041 kcal/mol

| Atom | X           | Y           | Z           |
|------|-------------|-------------|-------------|
| C    | 0.00000000  | 0.00000000  | 0.00000000  |
| C    | 0.00000000  | 0.00000000  | 1.51804360  |
| O    | 0.98871142  | 0.00000000  | 2.21741176  |
| H    | -1.01669442 | -0.00432437 | 1.97783460  |
| H    | -0.50902248 | 0.93575331  | -0.28845768 |
| C    | -0.86800891 | -1.16691709 | -0.51181954 |
| H    | -0.97665751 | -1.11346435 | -1.60000348 |
| H    | -0.40939475 | -2.13183567 | -0.26580587 |
| H    | -1.87266120 | -1.14749642 | -0.07289657 |
| C    | 1.41716966  | -0.01003020 | -0.57458930 |
| H    | 1.39119220  | 0.05645201  | -1.66758937 |
| H    | 2.00538647  | 0.82747058  | -0.18828333 |
| H    | 1.94065329  | -0.93189492 | -0.29918792 |



**Table 7.** Geometric coordinates and thermally corrected MP2 energies for cyclohexanone

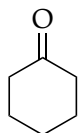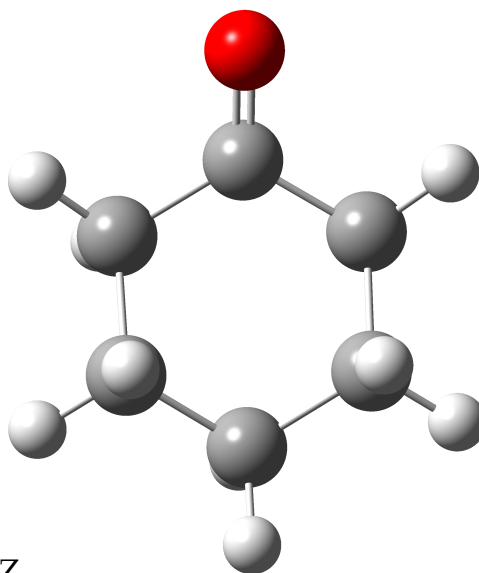

G = -309.757631 Hartree  
 $G_{\text{MP2}} = -193725.0256$  kcal/mol

| Atom | X           | Y           | Z           |
|------|-------------|-------------|-------------|
| C    | 0.00000000  | 0.00000000  | 0.00000000  |
| C    | 0.00000000  | 0.00000000  | 1.54381400  |
| C    | 1.41495215  | 0.00000000  | 2.11171024  |
| C    | 2.35410684  | 1.03938693  | 1.50983218  |
| C    | 2.31681547  | 1.02291955  | -0.03344341 |
| C    | 0.88000532  | 1.12409962  | -0.56472348 |
| H    | 0.45353190  | 2.09914072  | -0.28575894 |
| H    | 0.88121541  | 1.08551480  | -1.66105774 |
| H    | 2.93295106  | 1.84117007  | -0.42520537 |
| H    | 2.77108858  | 0.08936311  | -0.39372333 |
| H    | 2.02458134  | 2.02901051  | 1.86299877  |
| H    | 3.36124868  | 0.86626873  | 1.90029856  |
| O    | 1.76860109  | -0.77252106 | 2.98216716  |
| H    | -0.50074302 | 0.91402709  | 1.89945316  |
| H    | -0.54089889 | -0.85661114 | 1.95662514  |
| H    | 0.37513582  | -0.96849679 | -0.35913840 |
| H    | -1.02895696 | 0.09191125  | -0.36801461 |

**Table 8.** Geometric coordinates and thermally corrected MP2 energies for Lithium Diisopropylamide (LDA) with two THF

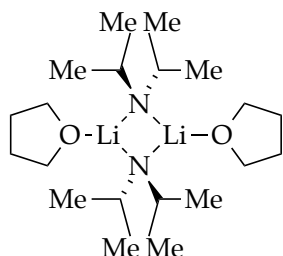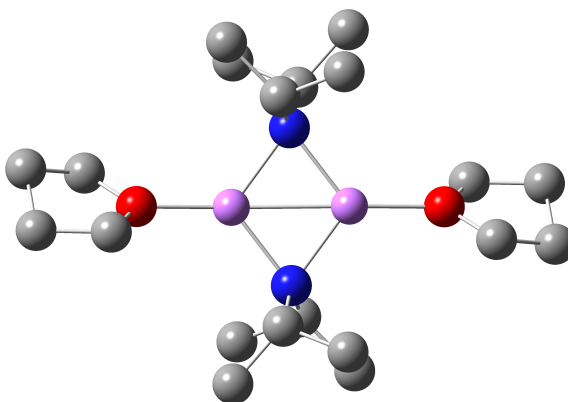

G = -1063.116483 Hartree

G<sub>MP2</sub> = -664731.8875 kcal/mol

| Atom | X           | Y           | Z           | Atom | X           | Y           | Z           |
|------|-------------|-------------|-------------|------|-------------|-------------|-------------|
| Li   | 0.00000000  | 0.00000000  | 0.00000000  | H    | -1.81410663 | 1.86918792  | 0.52758664  |
| Li   | 0.00000000  | 0.00000000  | 2.39346480  | C    | -0.80797530 | 3.64048612  | -0.06969212 |
| O    | 0.40731818  | 0.00000000  | 4.33666642  | H    | -1.76144100 | 4.13531583  | -0.30044256 |
| C    | -0.31160577 | 0.75031532  | 5.34554741  | H    | -0.12686892 | 4.41415138  | 0.30277974  |
| C    | 0.59705523  | 0.76867204  | 6.57773040  | H    | -0.38833529 | 3.25131946  | -1.00453270 |
| C    | 1.38039926  | -0.54444431 | 6.42411418  | C    | -1.67694186 | 3.10542503  | 2.23352810  |
| C    | 1.58550803  | -0.61184065 | 4.91113852  | H    | -1.90764523 | 2.30725174  | 2.94980958  |
| H    | 1.66334155  | -1.62770125 | 4.51728807  | H    | -1.02725739 | 3.83103093  | 2.73422227  |
| H    | 2.46883665  | -0.03867321 | 4.59941701  | H    | -2.61874741 | 3.61787491  | 1.98945185  |
| H    | 0.77815914  | -1.39416582 | 6.76657132  | N    | -0.10056751 | -1.58942643 | 1.19475018  |
| H    | 2.32593881  | -0.55203312 | 6.97432432  | C    | -1.45024064 | -2.11026018 | 0.94660834  |
| H    | 0.02933285  | 0.82892055  | 7.51087129  | H    | -2.01730929 | -1.24034090 | 0.55530667  |
| H    | 1.27894121  | 1.62608966  | 6.53832804  | C    | -2.25393575 | -2.53615677 | 2.20621616  |
| H    | -0.52831103 | 1.74382359  | 4.94463141  | H    | -1.88302644 | -3.47070131 | 2.63922295  |
| H    | -1.25863823 | 0.23405677  | 5.54777776  | H    | -2.18688374 | -1.76102302 | 2.97989617  |
| N    | 0.10065090  | 1.58940008  | 1.19844710  | H    | -3.31687937 | -2.68187367 | 1.96567937  |
| C    | 1.45061143  | 2.11134115  | 1.44268300  | C    | -1.61016658 | -3.20211490 | -0.13915451 |
| H    | 2.01816461  | 1.24325327  | 1.83719553  | H    | -1.12639271 | -2.89814436 | -1.07426675 |
| C    | 2.25270052  | 2.53174806  | 0.18014310  | H    | -1.17230114 | -4.15778508 | 0.17079101  |
| H    | 1.88051137  | 3.46383384  | -0.25704450 | H    | -2.67263445 | -3.38625648 | -0.34991971 |
| H    | 3.31574980  | 2.67957908  | 0.41893210  | C    | 1.01809177  | -2.50661996 | 1.42936074  |
| H    | 2.18582944  | 1.75290378  | -0.58986241 | H    | 1.81259829  | -1.87278768 | 1.86904874  |
| C    | 1.61203409  | 3.20820544  | 2.52310583  | C    | 0.80533963  | -3.64782883 | 2.45331057  |
| H    | 2.67477213  | 3.39277027  | 2.73208364  | H    | 1.75848838  | -4.14330662 | 2.68391971  |
| H    | 1.17436550  | 4.16264437  | 2.20909523  | H    | 0.38259405  | -3.26483646 | 3.38929575  |
| H    | 1.12904002  | 2.90893149  | 3.46012848  | H    | 0.12597100  | -4.41975376 | 2.07408838  |
| C    | -1.01845863 | 2.50549465  | 0.96165094  | C    | 1.67956260  | -3.09907875 | 0.15550803  |

|   |             |             |             |
|---|-------------|-------------|-------------|
| H | 1.91199021  | -2.29654468 | -0.55533363 |
| H | 2.62077364  | -3.61310777 | 0.39856207  |
| H | 1.03082423  | -3.82148659 | -0.35101602 |
| O | -0.40911863 | 0.00065978  | -1.94291869 |
| C | 0.32168799  | -0.73329970 | -2.95513878 |
| C | -0.58918940 | -0.76559246 | -4.18524867 |
| C | -1.39441703 | 0.53377791  | -4.02789288 |
| C | -1.59749716 | 0.59561021  | -2.51430010 |
| H | -2.47134196 | 0.00877276  | -2.20145036 |
| H | -1.68988997 | 1.60970501  | -2.11891500 |
| H | -2.34108731 | 0.52609058  | -4.57613032 |
| H | -0.80739252 | 1.39406498  | -4.37035596 |
| H | -1.25623881 | -1.63457594 | -4.14535146 |
| H | -0.02267117 | -0.81489229 | -5.11976866 |
| H | 1.25848431  | -0.19892221 | -3.15816049 |
| H | 0.55777425  | -1.72358252 | -2.55713091 |

**Table 9.** Geometric coordinates and thermally corrected MP2 energies for 5 monomer with three THF

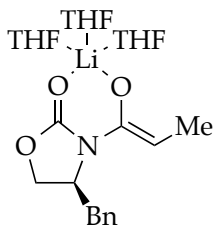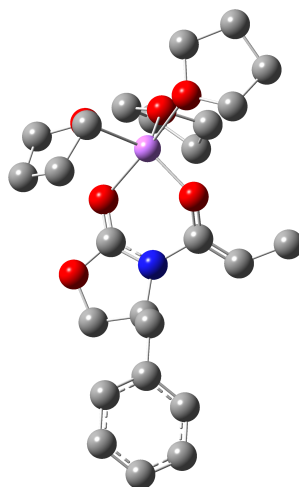

G = -1488.697668 Hartree

G<sub>MP2</sub> = -931168.1672 kcal/mol

ΔG<sub>MP2</sub> = 1.777728882 kcal/mol Li vs. 5 spirocyclic dimer with three THF

| Atom | X           | Y           | Z           | Atom | X           | Y           | Z           |
|------|-------------|-------------|-------------|------|-------------|-------------|-------------|
| C    | 0.00000000  | 0.00000000  | 0.00000000  | C    | -2.85974559 | 2.47204057  | -5.04842001 |
| H    | 0.00000000  | 0.00000000  | 1.09594000  | C    | -1.34964607 | 2.25033660  | -4.87083115 |
| H    | 1.03066998  | 0.00000000  | -0.35974383 | C    | -0.96978914 | 3.24248220  | -3.73607744 |
| C    | -0.85316631 | -1.14441615 | -0.57725508 | C    | -2.32693566 | 3.82694767  | -3.29082687 |
| H    | -0.98029291 | -1.93649274 | 0.16534604  | H    | -2.50912249 | 4.80845278  | -3.75440419 |
| N    | -2.11842155 | -0.44096168 | -0.80121795 | H    | -2.43639544 | 3.90177402  | -2.21024045 |
| C    | -1.93456686 | 0.90087743  | -0.80409189 | H    | -0.29145113 | 4.02946614  | -4.08072996 |
| O    | -0.64453267 | 1.20553213  | -0.45424963 | H    | -0.48651079 | 2.72260351  | -2.90494278 |
| O    | -2.73602623 | 1.79426663  | -1.06148375 | H    | -0.79773129 | 2.43127560  | -5.79860894 |
| C    | -3.34485027 | -1.08936684 | -1.31776815 | H    | -1.15511072 | 1.21838809  | -4.56204428 |
| O    | -3.94969478 | -0.45044848 | -2.25651827 | H    | -3.43105001 | 1.58350758  | -5.31587396 |
| Li   | -4.21593375 | 1.39759846  | -2.49053784 | H    | -3.05813696 | 3.26450037  | -5.78780773 |
| O    | -5.57440760 | 1.08006719  | -4.19391830 | O    | -5.77654675 | 2.12760340  | -1.31084364 |
| C    | -6.63423766 | 2.00849569  | -4.49905687 | C    | -5.55171938 | 3.20328131  | -0.36813717 |
| C    | -7.86470437 | 1.16241863  | -4.89526286 | C    | -6.20389452 | 2.76558038  | 0.95139395  |
| C    | -7.48655499 | -0.25387141 | -4.42289714 | C    | -6.18305332 | 1.23294871  | 0.83754632  |
| C    | -5.96920194 | -0.24331523 | -4.59354319 | C    | -6.44674952 | 1.02758075  | -0.65219153 |
| H    | -5.69196602 | -0.41288884 | -5.64697535 | H    | -7.52277834 | 1.07753907  | -0.87734773 |
| H    | -5.42006442 | -0.93340955 | -3.95272046 | H    | -6.02719185 | 0.10468583  | -1.05784732 |
| H    | -7.97754996 | -1.04411460 | -4.99970343 | H    | -6.92952530 | 0.74144810  | 1.46927937  |
| H    | -7.74046493 | -0.39221189 | -3.36576493 | H    | -5.19541249 | 0.83775181  | 1.09814018  |
| H    | -8.00653569 | 1.17357414  | -5.98212222 | H    | -7.23714986 | 3.12819324  | 1.01272392  |
| H    | -8.78746392 | 1.53393194  | -4.43899665 | H    | -5.66267094 | 3.14306848  | 1.82431946  |
| H    | -6.80171037 | 2.60700094  | -3.59975795 | H    | -4.47055600 | 3.33292473  | -0.26424186 |
| H    | -6.31410918 | 2.67479076  | -5.31025337 | H    | -5.98776997 | 4.12185564  | -0.77686145 |
| O    | -3.32136783 | 2.90205065  | -3.76041224 | C    | -3.65265587 | -2.28855273 | -0.75162469 |

|   |             |             |             |
|---|-------------|-------------|-------------|
| H | -3.05586139 | -2.64819289 | 0.08202871  |
| C | -4.80763651 | -3.13596707 | -1.20166318 |
| H | -5.28107373 | -2.69786790 | -2.08585431 |
| H | -4.49742560 | -4.15938598 | -1.46344715 |
| H | -5.58542299 | -3.23902695 | -0.42809985 |
| C | -0.29872778 | -1.76128376 | -1.88291290 |
| H | -1.10608630 | -2.36181030 | -2.31660968 |
| H | -0.07845946 | -0.95007159 | -2.58790179 |
| C | 0.92905743  | -2.61367528 | -1.65328589 |
| C | 0.80857337  | -3.88536082 | -1.07149601 |
| C | 1.93417077  | -4.67054093 | -0.82518845 |
| C | 3.20612267  | -4.19847288 | -1.15865892 |
| C | 3.34091939  | -2.93853995 | -1.74203639 |
| C | 2.21070224  | -2.15475958 | -1.98548926 |
| H | 2.32357864  | -1.17786268 | -2.45129386 |
| H | 4.32519422  | -2.56475485 | -2.01236111 |
| H | 4.08366141  | -4.81104786 | -0.96983251 |
| H | 1.81846032  | -5.65458290 | -0.37810616 |
| H | -0.17999370 | -4.26448076 | -0.82042804 |

**Table 10.** Geometric coordinates and thermally corrected MP2 energies for 5 dimer with three THF

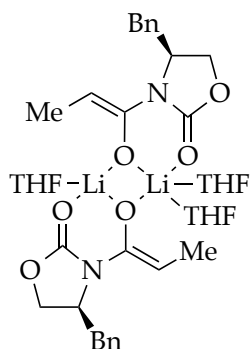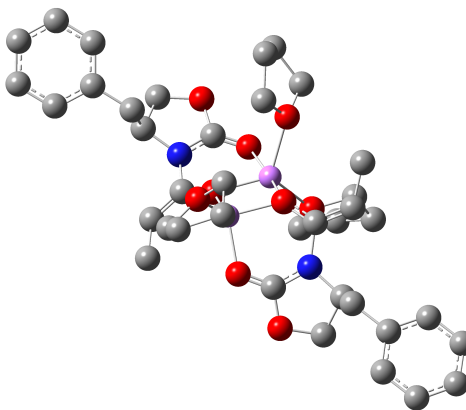

G = -2280.364885 Hartree

$G_{\text{MP2}} = -1426402.09$  kcal/mol

$\Delta G_{\text{MP2}} = 0.464733826$  kcal/mol Li vs. 5 spirocyclic dimer with three THF

| Atom | X           | Y           | Z           | Atom | X           | Y           | Z           |
|------|-------------|-------------|-------------|------|-------------|-------------|-------------|
| Li   | 0.00000000  | 0.00000000  | 0.00000000  | H    | -4.01503670 | -1.91847151 | -3.09335609 |
| O    | 0.00000000  | 0.00000000  | 2.09165270  | C    | -4.63738511 | -0.24444646 | -1.86884380 |
| C    | 0.99342614  | 0.00000000  | 2.92031074  | H    | -4.65688413 | -0.80630148 | -0.92799016 |
| N    | 1.35790556  | -1.31744840 | 3.45956960  | H    | -4.26822896 | 0.76228810  | -1.63740089 |
| C    | 2.56016196  | -1.59371484 | 4.25589949  | C    | -6.02304792 | -0.17499475 | -2.47070542 |
| C    | 2.69389166  | -3.10082569 | 4.01566581  | C    | -6.52422398 | 1.01688896  | -3.01127189 |
| H    | 3.28970852  | -3.32774722 | 3.12388995  | C    | -7.79327332 | 1.06592495  | -3.59233283 |
| H    | 3.08959768  | -3.65072230 | 4.87091330  | C    | -8.58428306 | -0.08200330 | -3.64294606 |
| O    | 1.33842747  | -3.52980655 | 3.78567089  | C    | -8.09927586 | -1.27666425 | -3.10502875 |
| C    | 0.61810509  | -2.45833344 | 3.33951555  | C    | -6.83209370 | -1.32052062 | -2.52466066 |
| O    | -0.53172776 | -2.62126051 | 2.94395121  | H    | -6.46623006 | -2.25219015 | -2.09776763 |
| Li   | -1.40648311 | -1.23455606 | 1.90689905  | H    | -8.71140586 | -2.17448575 | -3.13269963 |
| O    | -1.51931076 | -1.21005511 | 0.04284567  | H    | -9.57282570 | -0.04630622 | -4.09284627 |
| C    | -2.10322095 | -1.87011204 | -0.91261454 | H    | -8.16372082 | 2.00248014  | -4.00121262 |
| N    | -2.31124588 | -1.10492024 | -2.14788611 | H    | -5.91847749 | 1.91974592  | -2.96570610 |
| C    | -3.61455113 | -0.94601960 | -2.79377029 | C    | -2.57268915 | -3.14171282 | -0.92038581 |
| C    | -3.20408559 | -0.12653378 | -4.03156278 | C    | -2.51463799 | -4.07748817 | 0.25310929  |
| H    | -3.02663598 | -0.76560011 | -4.90400252 | H    | -3.49784619 | -4.22365210 | 0.73022749  |
| H    | -3.92124598 | 0.65268466  | -4.29624722 | H    | -2.17053731 | -5.07515484 | -0.05321954 |
| O    | -1.96007706 | 0.49962652  | -3.66444034 | H    | -1.82373156 | -3.72053407 | 1.02269769  |
| C    | -1.41327035 | -0.20250651 | -2.61866675 | H    | -2.99976656 | -3.52264780 | -1.84452985 |
| O    | -0.27332877 | 0.01906335  | -2.23413517 | O    | -3.05684484 | -0.79601339 | 2.99063715  |

|   |             |             |             |   |             |            |             |
|---|-------------|-------------|-------------|---|-------------|------------|-------------|
| C | -3.73293446 | -1.88287944 | 3.67130715  | H | -1.30279422 | 4.61487808 | -2.04978348 |
| C | -3.99883526 | -1.39581749 | 5.10465580  | H | -2.00155405 | 2.99444720 | -2.24494312 |
| C | -2.93348887 | -0.30328514 | 5.29270751  | H | -1.77084626 | 4.61814051 | 0.35196101  |
| C | -2.87332658 | 0.31272248  | 3.89679561  | H | -3.22355182 | 3.81623910 | -0.26445268 |
| H | -1.91739946 | 0.77793082  | 3.64597446  | H | -2.39499499 | 1.62595679 | 0.35177415  |
| H | -3.68448258 | 1.04034412  | 3.74672057  | H | -1.51338682 | 2.56604152 | 1.57390323  |
| H | -1.96551540 | -0.74898021 | 5.54843321  |   |             |            |             |
| H | -3.19328189 | 0.42576568  | 6.06651105  |   |             |            |             |
| H | -3.92101197 | -2.20547658 | 5.83636819  |   |             |            |             |
| H | -5.00327860 | -0.96382360 | 5.18649221  |   |             |            |             |
| H | -4.65036860 | -2.12158338 | 3.12323247  |   |             |            |             |
| H | -3.06775763 | -2.75178563 | 3.64851321  |   |             |            |             |
| H | 3.40864007  | -1.04259418 | 3.84399633  |   |             |            |             |
| C | 2.36379984  | -1.24336279 | 5.75441647  |   |             |            |             |
| H | 2.00086572  | -0.21276789 | 5.81525278  |   |             |            |             |
| H | 1.56911011  | -1.88679566 | 6.15219384  |   |             |            |             |
| C | 3.62684159  | -1.41173845 | 6.57053396  |   |             |            |             |
| C | 4.67443452  | -0.48389166 | 6.46263395  |   |             |            |             |
| C | 5.85297833  | -0.64472326 | 7.19041397  |   |             |            |             |
| C | 6.00683617  | -1.73937737 | 8.04448791  |   |             |            |             |
| C | 4.97270022  | -2.66777565 | 8.16531966  |   |             |            |             |
| C | 3.79460207  | -2.50323371 | 7.43345004  |   |             |            |             |
| H | 2.98877931  | -3.22628726 | 7.54177627  |   |             |            |             |
| H | 5.07891459  | -3.51973402 | 8.83186893  |   |             |            |             |
| H | 6.92375559  | -1.86384556 | 8.61423792  |   |             |            |             |
| H | 6.65006320  | 0.08813656  | 7.09520311  |   |             |            |             |
| H | 4.56091358  | 0.37828175  | 5.80852951  |   |             |            |             |
| C | 1.74204533  | 1.06830151  | 3.31586929  |   |             |            |             |
| H | 2.53273475  | 0.94198701  | 4.04598933  |   |             |            |             |
| C | 1.48882385  | 2.46406972  | 2.81625263  |   |             |            |             |
| H | 0.88934411  | 2.44509583  | 1.90195053  |   |             |            |             |
| H | 0.95726403  | 3.08984048  | 3.55268320  |   |             |            |             |
| H | 2.42908239  | 2.98822003  | 2.59189110  |   |             |            |             |
| O | 1.95039740  | -0.53940289 | -0.30104156 |   |             |            |             |
| C | 3.01066083  | 0.43326776  | -0.18837346 |   |             |            |             |
| C | 4.23159562  | -0.21769199 | -0.84052911 |   |             |            |             |
| C | 3.58024837  | -1.06066299 | -1.94818025 |   |             |            |             |
| C | 2.30254031  | -1.55757141 | -1.26565303 |   |             |            |             |
| H | 2.47149455  | -2.49894500 | -0.72635721 |   |             |            |             |
| H | 1.45970583  | -1.67968865 | -1.94808768 |   |             |            |             |
| H | 4.21286758  | -1.88111916 | -2.30110089 |   |             |            |             |
| H | 3.33038284  | -0.42837161 | -2.80817736 |   |             |            |             |
| H | 4.75128748  | -0.86379840 | -0.12224776 |   |             |            |             |
| H | 4.94893926  | 0.51806875  | -1.21742955 |   |             |            |             |
| H | 2.71711376  | 1.34649492  | -0.72500813 |   |             |            |             |
| H | 3.13145610  | 0.67037836  | 0.87190492  |   |             |            |             |
| O | -0.43464958 | 2.06821086  | -0.12169904 |   |             |            |             |
| C | -1.68392735 | 2.44700904  | 0.50030975  |   |             |            |             |
| C | -2.13374394 | 3.73997457  | -0.19545659 |   |             |            |             |
| C | -1.43959934 | 3.64357360  | -1.56382563 |   |             |            |             |
| C | -0.11539018 | 2.97785463  | -1.19151905 |   |             |            |             |
| H | 0.61523850  | 3.71715369  | -0.83065384 |   |             |            |             |
| H | 0.32366584  | 2.39097183  | -1.99983444 |   |             |            |             |

**Table 11.** Geometric coordinates and thermally corrected MP2 energies for 5 spirocyclic dimer with three THF

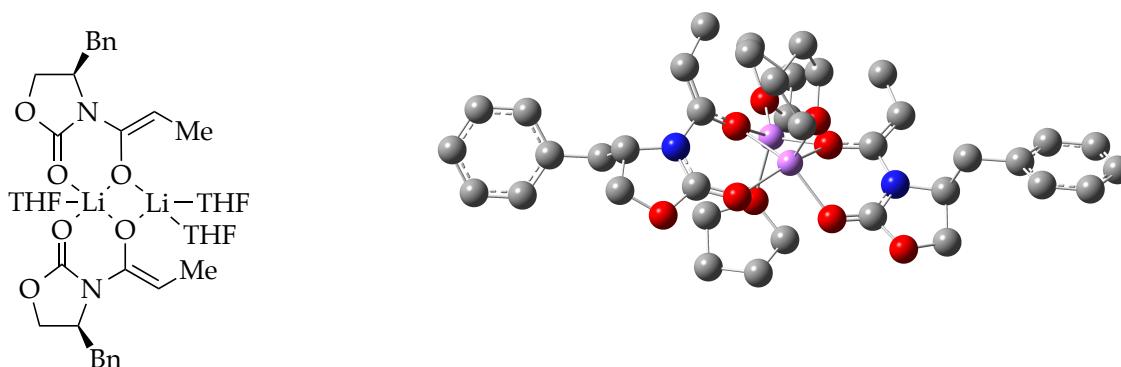

G = -2280.364091 Hartree

$G_{\text{MP2}} = -1426403.019$  kcal/mol

$\Delta G_{\text{MP2}} = 0$  kcal/mol Li vs. 5 spirocyclic dimer with three THF

| Atom | X           | Y           | Z          | Atom | X            | Y           | Z           |
|------|-------------|-------------|------------|------|--------------|-------------|-------------|
| Li   | 0.00000000  | 0.00000000  | 0.00000000 | H    | 4.72451744   | 0.37921376  | 0.95129433  |
| Li   | 0.00000000  | 0.00000000  | 2.64675340 | C    | 3.40445209   | 1.47805017  | -0.44200456 |
| O    | 1.42158727  | 0.00000000  | 1.22252404 | H    | 3.75304414   | 2.50246430  | -0.23523650 |
| C    | 2.70017616  | -0.07916138 | 1.40962945 | H    | 3.90707471   | 1.16684569  | -1.37206797 |
| N    | 3.10345919  | -0.95148272 | 2.51077992 | H    | 2.33134404   | 1.53059606  | -0.64603361 |
| C    | 2.24401552  | -1.59208037 | 3.36604910 | O    | -1.25466153  | 0.77082323  | 1.15133164  |
| O    | 1.02776929  | -1.53558835 | 3.45652268 | C    | -2.33903443  | 1.40665717  | 1.45839205  |
| O    | 2.95882065  | -2.39081439 | 4.21870318 | N    | -3.27833763  | 0.65456561  | 2.29930224  |
| C    | 4.32759506  | -2.42201987 | 3.78251697 | C    | -4.73077112  | 0.64653867  | 2.11514336  |
| H    | 4.48391403  | -3.32016850 | 3.17279330 | C    | -5.15945031  | -0.19230477 | 3.33455295  |
| H    | 4.97166502  | -2.46372992 | 4.66237868 | H    | -5.46704343  | 0.43695706  | 4.17750621  |
| C    | 4.48596158  | -1.13545883 | 2.96439887 | H    | -5.95582010  | -0.90507751 | 3.11186467  |
| H    | 5.14564339  | -1.29616799 | 2.10814527 | O    | -3.98265630  | -0.92407155 | 3.71747341  |
| C    | 4.98459092  | 0.06752915  | 3.80594591 | C    | -2.88523435  | -0.30024934 | 3.18921826  |
| H    | 4.81620975  | 0.97388572  | 3.21573878 | O    | -1.75637968  | -0.61489450 | 3.53628732  |
| H    | 4.35267569  | 0.14276369  | 4.69925115 | H    | -5.13504286  | 1.65956339  | 2.19261179  |
| C    | 6.43976478  | -0.04987625 | 4.20176893 | C    | -5.14236853  | 0.04544446  | 0.75033303  |
| C    | 7.45608840  | 0.16992794  | 3.25907166 | H    | -4.57047773  | 0.57672072  | -0.01918190 |
| C    | 8.79973480  | 0.03606866  | 3.60749060 | H    | -4.83084267  | -1.00595533 | 0.72401781  |
| C    | 9.15487827  | -0.31987133 | 4.91080470 | C    | -6.62556416  | 0.16297190  | 0.47851334  |
| C    | 8.15613350  | -0.53668423 | 5.86036806 | C    | -7.47800246  | -0.94331326 | 0.59278459  |
| C    | 6.81188336  | -0.40240949 | 5.50642505 | C    | -8.85096762  | -0.81906738 | 0.36880409  |
| H    | 6.03960493  | -0.56195990 | 6.25609898 | C    | -9.39471475  | 0.41901075  | 0.02600697  |
| H    | 8.42103710  | -0.80659621 | 6.87943467 | C    | -8.55630339  | 1.52988565  | -0.09550580 |
| H    | 10.20173676 | -0.42171454 | 5.18406992 | C    | -7.18599739  | 1.40099612  | 0.12789485  |
| H    | 9.57085847  | 0.21525196  | 2.86257466 | H    | -6.53770853  | 2.26833267  | 0.02029446  |
| H    | 7.19038623  | 0.45962248  | 2.24437674 | H    | -8.96986830  | 2.49680664  | -0.37034986 |
| C    | 3.68347372  | 0.54005379  | 0.69736431 | H    | -10.46236076 | 0.51786082  | -0.15067490 |



|   |             |             |             |
|---|-------------|-------------|-------------|
| H | -9.49325448 | -1.69130201 | 0.45869457  |
| H | -7.06051600 | -1.91499147 | 0.84860301  |
| C | -2.72074104 | 2.66317182  | 1.10517845  |
| C | -1.91011929 | 3.55844301  | 0.21332943  |
| H | -1.68514161 | 4.52274127  | 0.69339912  |
| H | -0.95638209 | 3.08635815  | -0.04003593 |
| H | -2.42612375 | 3.79961309  | -0.73005537 |
| H | -3.64979027 | 3.06163447  | 1.50268644  |
| O | 0.56543717  | 1.56534458  | 3.82778622  |
| C | 0.81848338  | 2.80623787  | 3.12105374  |
| C | 0.19293384  | 3.92431721  | 3.97287657  |
| C | -0.83394886 | 3.16523622  | 4.83023380  |
| C | -0.11190468 | 1.84035697  | 5.06675306  |
| H | -0.76883216 | 0.99278082  | 5.27297151  |
| H | 0.62610727  | 1.92902097  | 5.87845697  |
| H | -1.75134312 | 2.99488354  | 4.25567237  |
| H | -1.09103855 | 3.68309251  | 5.75993680  |
| H | -0.25934893 | 4.70673045  | 3.35625016  |
| H | 0.94884927  | 4.39480471  | 4.61322193  |
| H | 1.89953055  | 2.92034042  | 2.98818019  |
| H | 0.35016021  | 2.71692712  | 2.13801124  |
| O | -0.47667988 | -1.98146162 | -0.35773118 |
| C | -1.88852367 | -2.30284384 | -0.34434523 |
| C | -2.03521251 | -3.60983883 | 0.45533688  |
| C | -0.73445918 | -3.66009543 | 1.27479345  |
| C | 0.26292025  | -3.02676331 | 0.30947420  |
| H | 0.61977938  | -3.75107342 | -0.43864421 |
| H | 1.11486739  | -2.55160894 | 0.79620809  |
| H | -0.45154159 | -4.67669763 | 1.56574388  |
| H | -0.81418570 | -3.04994509 | 2.17958617  |
| H | -2.09680523 | -4.47023546 | -0.22172596 |
| H | -2.93235790 | -3.61166843 | 1.08185553  |
| H | -2.40341643 | -1.46224768 | 0.12998612  |
| H | -2.24101976 | -2.39757185 | -1.37842868 |
| O | 0.21839509  | 0.51320090  | -1.92850377 |
| C | -0.06066991 | 1.75496831  | -2.60661915 |
| C | 0.27203018  | 1.49708002  | -4.07594739 |
| C | 1.45504793  | 0.52320790  | -3.96030531 |
| C | 1.05687665  | -0.33279684 | -2.75343972 |
| H | 1.90973550  | -0.66075765 | -2.15252042 |
| H | 0.47144132  | -1.21172592 | -3.04508163 |
| H | 2.37968865  | 1.07287969  | -3.75018783 |
| H | 1.61358423  | -0.07716333 | -4.86120721 |
| H | 0.51685549  | 2.41594037  | -4.61724649 |
| H | -0.57435396 | 1.01711052  | -4.58180258 |
| H | -1.10637647 | 2.01280937  | -2.42293687 |
| H | 0.57588163  | 2.54552465  | -2.18653644 |

**Table 12.** Geometric coordinates and thermally corrected MP2 energies for 5  $D_{2d}$  tetramer

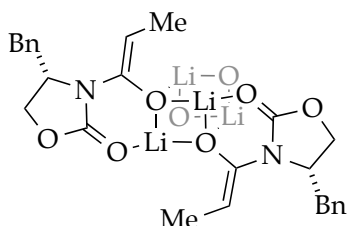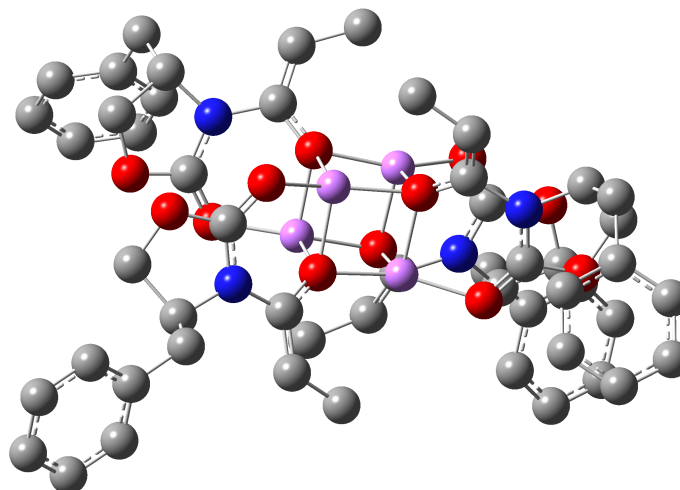

$G = -3166.662534$  Hartree

$G_{MP2} = -1980930.794$  kcal/mol

$\Delta G_{MP2} = 0.375561044$  kcal/mol Li vs. 5 spirocyclic dimer with three THF

| Atom | X           | Y           | Z           | Atom | X           | Y           | Z           |
|------|-------------|-------------|-------------|------|-------------|-------------|-------------|
| Li   | 0.00000000  | 0.00000000  | 0.00000000  | C    | -1.92064642 | 2.98500716  | -4.25853369 |
| O    | 0.00000000  | 0.00000000  | 1.89861070  | H    | -2.82262435 | 2.37091814  | -4.30870624 |
| C    | 1.05585130  | 0.00000000  | 2.52402978  | N    | -0.95399263 | 2.35428375  | -3.34779468 |
| O    | 1.12651741  | -0.59231240 | 3.74489124  | C    | -1.30389776 | 1.62759451  | -2.14149057 |
| C    | 2.50137875  | -0.59782195 | 4.18227305  | C    | -2.51844401 | 1.82556346  | -1.57783798 |
| H    | 2.91749791  | -1.59017164 | 3.98345487  | H    | -3.18305215 | 2.57926802  | -1.98217944 |
| H    | 2.50872415  | -0.39220160 | 5.25391674  | C    | -2.99438943 | 1.06416526  | -0.37019718 |
| C    | 3.17781310  | 0.49877718  | 3.34189588  | H    | -2.59131260 | 0.04451436  | -0.34260460 |
| H    | 4.16626791  | 0.18314087  | 2.99581318  | H    | -2.71374752 | 1.54719054  | 0.57873746  |
| N    | 2.26657711  | 0.53607049  | 2.19012104  | H    | -4.08745118 | 0.97571288  | -0.36893686 |
| C    | 2.64016857  | 0.95192206  | 0.85098338  | O    | -0.38806896 | 0.77865933  | -1.73170696 |
| C    | 3.69779669  | 1.77859681  | 0.67780146  | Li   | -0.01973221 | -1.03106286 | -2.49492021 |
| H    | 4.21004590  | 2.18878057  | 1.53828089  | O    | -0.29270694 | -1.07497797 | -4.37329619 |
| C    | 4.20137889  | 2.17854646  | -0.68327539 | C    | 0.60921506  | -0.76095601 | -5.14394454 |
| H    | 3.67767766  | 3.05574343  | -1.09407348 | O    | 0.31566577  | -0.20466281 | -6.34840040 |
| H    | 5.26669231  | 2.43481941  | -0.64615718 | C    | 1.54258265  | 0.21819224  | -6.97883753 |
| H    | 4.09136604  | 1.36805456  | -1.41464629 | H    | 1.65326183  | 1.29511017  | -6.81933748 |
| O    | 1.91456735  | 0.42211923  | -0.10906251 | H    | 1.45933624  | 0.00014348  | -8.04479982 |
| Li   | 1.55502468  | 0.97865032  | -1.93350744 | C    | 2.64015445  | -0.59357477 | -6.26983272 |
| O    | 1.39380755  | 2.30442534  | -3.29685634 | H    | 3.52025717  | 0.02194645  | -6.06248136 |
| C    | 0.30965783  | 2.50810502  | -3.83698836 | N    | 1.96141851  | -0.88569767 | -5.00006409 |
| O    | 0.25857136  | 2.98092212  | -5.11391698 | C    | 2.63442461  | -1.13326491 | -3.73847330 |
| C    | -1.11762441 | 2.92962831  | -5.56274456 | C    | 3.91025443  | -1.58519171 | -3.73829876 |
| H    | -1.26428982 | 1.99018207  | -6.10391756 | H    | 4.39538785  | -1.83534211 | -4.67272286 |
| H    | -1.29118253 | 3.78066966  | -6.22229477 | C    | 4.70369053  | -1.77659578 | -2.47342918 |

|    |             |             |             |   |             |            |             |
|----|-------------|-------------|-------------|---|-------------|------------|-------------|
| H  | 4.54491543  | -2.76383502 | -2.01229470 | C | -3.33214590 | 5.05957908 | -4.72022930 |
| H  | 5.77877359  | -1.68808094 | -2.66917762 | C | -4.66965354 | 4.64507999 | -4.62662679 |
| H  | 4.45237947  | -1.02447135 | -1.71511423 | C | -5.65006310 | 5.19637888 | -5.45075399 |
| O  | 1.92589375  | -0.83362023 | -2.67215027 | C | -5.31053114 | 6.17692870 | -6.38600986 |
| Li | 2.02399625  | -1.43203668 | -0.82819381 | C | -3.98574503 | 6.60169457 | -6.48757954 |
| O  | 2.48122320  | -2.71027372 | 0.51335988  | C | -3.00673072 | 6.04574187 | -5.66104625 |
| C  | 1.60387382  | -3.22923745 | 1.19859453  | H | -1.97767295 | 6.39055064 | -5.73850614 |
| O  | 1.88658772  | -3.66540840 | 2.45817005  | H | -3.71196117 | 7.36883396 | -7.20718153 |
| C  | 0.64238730  | -4.03523705 | 3.10095144  | H | -6.07446573 | 6.60887797 | -7.02677761 |
| H  | 0.28979213  | -3.17627251 | 3.67956500  | H | -6.68075303 | 4.86372387 | -5.35985339 |
| H  | 0.83916284  | -4.88287767 | 3.75835927  | H | -4.94703174 | 3.88859036 | -3.89523453 |
| C  | -0.28210093 | -4.36744056 | 1.92457225  | C | 3.32644400  | 1.84430271 | 4.10679056  |
| H  | -1.31338985 | -4.06383030 | 2.11811287  | H | 3.98833360  | 1.64375929 | 4.95970592  |
| N  | 0.29868188  | -3.48779868 | 0.89960133  | H | 3.85779343  | 2.55437463 | 3.46677069  |
| C  | -0.42951179 | -2.93396175 | -0.22670589 | C | 2.03507475  | 2.46758824 | 4.59071825  |
| C  | -1.58962902 | -3.51306422 | -0.61497172 | C | 1.63137114  | 2.35463825 | 5.92787246  |
| C  | -2.44650780 | -2.96492025 | -1.72406874 | C | 0.43453407  | 2.92317978 | 6.36694327  |
| H  | -2.39445369 | -1.87080114 | -1.78073969 | C | -0.37837431 | 3.61838011 | 5.47132229  |
| H  | -2.16391030 | -3.35247264 | -2.71528466 | C | 0.01754474  | 3.74871394 | 4.13839016  |
| H  | -3.50018829 | -3.22708096 | -1.57058009 | C | 1.21540686  | 3.18176551 | 3.70287015  |
| H  | -1.92146240 | -4.42685102 | -0.13735196 | H | 1.52311115  | 3.29660402 | 2.66647921  |
| O  | 0.10745189  | -1.85154012 | -0.74380530 | H | -0.60412635 | 4.29701291 | 3.43561711  |
| C  | -0.21934411 | -5.86457803 | 1.52546649  | H | -1.31053469 | 4.06221548 | 5.81040796  |
| H  | -0.67956097 | -5.98204870 | 0.53947201  | H | 0.14086640  | 2.82589022 | 7.40890901  |
| H  | 0.83546271  | -6.14444563 | 1.41482335  | H | 2.26617602  | 1.82667188 | 6.63698233  |
| C  | -0.89574915 | -6.76737888 | 2.53527464  |   |             |            |             |
| C  | -0.14783387 | -7.58159975 | 3.39621336  |   |             |            |             |
| C  | -0.77562379 | -8.39588797 | 4.34147672  |   |             |            |             |
| C  | -2.16692970 | -8.40718045 | 4.44117447  |   |             |            |             |
| C  | -2.92556148 | -7.60256720 | 3.58762981  |   |             |            |             |
| C  | -2.29466474 | -6.79220938 | 2.64443602  |   |             |            |             |
| H  | -2.89585652 | -6.17648166 | 1.97840309  |   |             |            |             |
| H  | -4.01039066 | -7.60954720 | 3.65349266  |   |             |            |             |
| H  | -2.65798285 | -9.04089709 | 5.17467872  |   |             |            |             |
| H  | -0.17618863 | -9.02312141 | 4.99610882  |   |             |            |             |
| H  | 0.93731670  | -7.58697907 | 3.31700307  |   |             |            |             |
| C  | 3.08848239  | -1.84352170 | -7.07867600 |   |             |            |             |
| H  | 3.52522479  | -1.46694662 | -8.01314308 |   |             |            |             |
| H  | 3.90061567  | -2.33790231 | -6.53813405 |   |             |            |             |
| C  | 1.99971230  | -2.84876529 | -7.38587567 |   |             |            |             |
| C  | 1.39296970  | -2.89817868 | -8.64807137 |   |             |            |             |
| C  | 0.38241242  | -3.82094751 | -8.92323591 |   |             |            |             |
| C  | -0.03606692 | -4.71354003 | -7.93611004 |   |             |            |             |
| C  | 0.56816950  | -4.68316579 | -6.67737120 |   |             |            |             |
| C  | 1.57967297  | -3.76167261 | -6.40590449 |   |             |            |             |
| H  | 2.05355824  | -3.75092519 | -5.42748951 |   |             |            |             |
| H  | 0.25589155  | -5.38118221 | -5.90519611 |   |             |            |             |
| H  | -0.82240822 | -5.43314494 | -8.14759130 |   |             |            |             |
| H  | -0.07362597 | -3.84413160 | -9.90958802 |   |             |            |             |
| H  | 1.72300798  | -2.21555350 | -9.42887887 |   |             |            |             |
| C  | -2.27063653 | 4.43620771  | -3.83881216 |   |             |            |             |
| H  | -2.59797238 | 4.42768235  | -2.79451128 |   |             |            |             |
| H  | -1.35105396 | 5.03309284  | -3.87459170 |   |             |            |             |

**Table 13.** Geometric coordinates and thermally corrected MP2 energies for LDA 5 mixed dimer with three THF

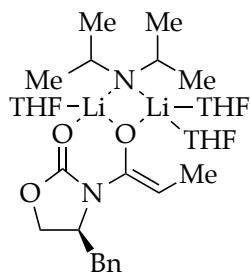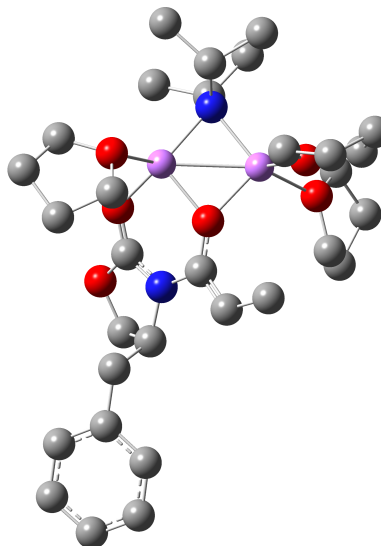

G = -1787.915892 Hartree

G<sub>MP2</sub> = -1118227.787 kcal/mol

| Atom | X           | Y           | Z           | Atom | X           | Y           | Z           |
|------|-------------|-------------|-------------|------|-------------|-------------|-------------|
| Li   | 0.00000000  | 0.00000000  | 0.00000000  | C    | -2.60424514 | 0.17761214  | -2.32042560 |
| O    | 0.00000000  | 0.00000000  | 1.95527310  | H    | -2.59045835 | -0.56851309 | -3.12149205 |
| C    | 0.81677532  | 0.00000000  | 2.96012211  | H    | -3.41988556 | 0.88159084  | -2.54563655 |
| N    | 0.86336440  | -1.25049413 | 3.72021522  | H    | -1.65758240 | 0.72808454  | -2.35735951 |
| C    | 1.79873533  | -1.52869629 | 4.81768955  | C    | -4.15093636 | -1.20719898 | -0.89977196 |
| C    | 1.73906511  | -3.05949988 | 4.82987813  | H    | -4.97307454 | -0.52050149 | -1.14664786 |
| H    | 2.47498393  | -3.50931433 | 4.15309160  | H    | -4.18220751 | -2.02305911 | -1.63132648 |
| H    | 1.84234736  | -3.49590858 | 5.82446021  | H    | -4.35095076 | -1.63489513 | 0.08886877  |
| O    | 0.41878550  | -3.35356258 | 4.33777452  | C    | -1.30184465 | -2.51169766 | -0.81578543 |
| C    | -0.01030452 | -2.29654314 | 3.58584778  | H    | -0.27908561 | -2.69076714 | -0.43384351 |
| O    | -1.05352614 | -2.38130518 | 2.95222075  | C    | -1.21224699 | -2.74465874 | -2.34488342 |
| Li   | -1.60196420 | -1.01790348 | 1.65312489  | H    | -0.75201513 | -3.71877729 | -2.56400519 |
| O    | -3.17268196 | -0.16877952 | 2.65474479  | H    | -2.20243431 | -2.74703528 | -2.81543969 |
| C    | -4.14611398 | -1.06788624 | 3.24103793  | H    | -0.61428407 | -1.96586672 | -2.83144184 |
| C    | -4.49450081 | -0.48672830 | 4.61974407  | C    | -2.13643300 | -3.66823885 | -0.19591145 |
| C    | -3.24907053 | 0.35031306  | 4.95412108  | H    | -2.16431602 | -3.57777562 | 0.89509827  |
| C    | -2.86645497 | 0.89408490  | 3.57906752  | H    | -3.16684010 | -3.68211951 | -0.56560736 |
| H    | -1.80693666 | 1.13203475  | 3.46290128  | H    | -1.68823204 | -4.64366739 | -0.43710313 |
| H    | -3.46500004 | 1.78098483  | 3.32297081  | H    | 2.79615785  | -1.16844311 | 4.55482436  |
| H    | -2.44858932 | -0.29022317 | 5.34201444  | C    | 1.33464490  | -0.89955373 | 6.15763737  |
| H    | -3.44178883 | 1.14227780  | 5.68457171  | H    | 1.13712428  | 0.16230775  | 5.98083211  |
| H    | -4.70210151 | -1.26811167 | 5.35686772  | H    | 0.37930906  | -1.36155505 | 6.43642879  |
| H    | -5.37823608 | 0.15904441  | 4.55541500  | C    | 2.34315313  | -1.07456927 | 7.27209315  |
| H    | -5.00957212 | -1.13231849 | 2.57142406  | C    | 3.51581682  | -0.30401532 | 7.29926346  |
| H    | -3.68121045 | -2.05630954 | 3.31902711  | C    | 4.46504201  | -0.47785123 | 8.30583652  |
| N    | -1.62880436 | -1.15561486 | -0.35706991 | C    | 4.25800259  | -1.42742768 | 9.30920869  |
| C    | -2.79402158 | -0.45997865 | -0.91510556 | C    | 3.09455192  | -2.19706269 | 9.29851281  |
| H    | -2.94590531 | 0.40138762  | -0.24044276 | C    | 2.14726157  | -2.02041747 | 8.28760766  |

|   |             |             |             |
|---|-------------|-------------|-------------|
| H | 1.23707324  | -2.61666664 | 8.29299534  |
| H | 2.91980715  | -2.93331473 | 10.07868455 |
| H | 4.99570111  | -1.56134536 | 10.09574262 |
| H | 5.36451024  | 0.13235824  | 8.31064683  |
| H | 3.68120297  | 0.44691548  | 6.52927166  |
| C | 1.64274449  | 1.01148344  | 3.35192052  |
| H | 2.27420385  | 0.89551893  | 4.22458771  |
| C | 1.70128412  | 2.33429163  | 2.63984709  |
| H | 1.21296861  | 2.27146624  | 1.66338001  |
| H | 1.20945069  | 3.14221604  | 3.20615909  |
| H | 2.73849715  | 2.66203795  | 2.47719136  |
| O | 1.88498098  | -0.40807203 | -0.73275030 |
| C | 3.06609920  | -0.08405751 | 0.03289678  |
| C | 4.02250377  | -1.25102408 | -0.20177448 |
| C | 3.72754416  | -1.60212551 | -1.66828398 |
| C | 2.21365993  | -1.36841124 | -1.76585118 |
| H | 1.64280187  | -2.28135772 | -1.57158429 |
| H | 1.90271879  | -0.96425905 | -2.73461539 |
| H | 4.00553554  | -2.62601657 | -1.93533071 |
| H | 4.26900447  | -0.92134143 | -2.33594323 |
| H | 3.76381068  | -2.09069817 | 0.45432199  |
| H | 5.06815984  | -0.98316738 | -0.02116547 |
| H | 3.49330235  | 0.85740839  | -0.34324412 |
| H | 2.76589838  | 0.05440411  | 1.07390894  |
| O | -0.04598026 | 1.98298805  | -0.57443947 |
| C | -1.04981245 | 2.89659415  | -0.08657295 |
| C | -0.62465764 | 4.26987350  | -0.60387140 |
| C | -0.02240942 | 3.91081410  | -1.97174993 |
| C | 0.66222143  | 2.56670067  | -1.68780703 |
| H | 1.71163779  | 2.69575247  | -1.39583512 |
| H | 0.61760305  | 1.87530657  | -2.53519427 |
| H | 0.67700653  | 4.66215392  | -2.35083385 |
| H | -0.81893016 | 3.78416484  | -2.71383240 |
| H | 0.13889366  | 4.70533971  | 0.05158547  |
| H | -1.46114362 | 4.97217859  | -0.67056435 |
| H | -2.02872455 | 2.60073968  | -0.48455330 |
| H | -1.06845886 | 2.81126843  | 1.00241946  |

## Part 7: 5 Transition State Computations

Geometries are optimized at the B3LYP level of theory using the 6-31G(d) basis set. Energies are defined as follows:  $G$  is the sum of electronic and thermal free energies calculated at the B3LYP level of theory ( $T = 195$  K).  $G_{\text{MP2}}$  is derived from an MP2 SP calculation corresponding to the DFT-optimized geometry and includes a thermal correction from the DFT calculation.

**Table 14.** Geometric coordinates and thermally corrected MP2 energies for the transition state leading to (*R,S*)-**6** from **5** monomer with three THF

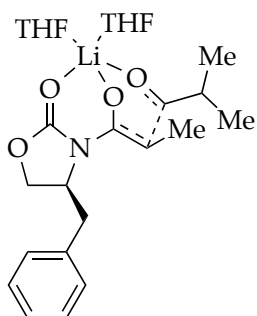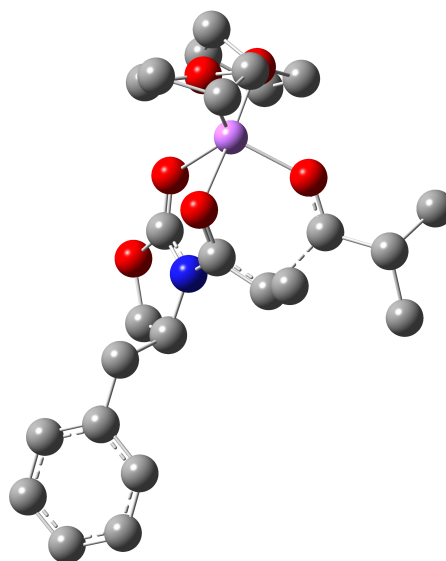

$G = -1488.69909$  Hartree

$G_{\text{MP2}} = -931170.4794$  kcal/mol

$\Delta G_{\text{MP2}} = 6.531685891$  kcal/mol Li vs. **5** monomer with three THF

| Atom | X          | Y           | Z          | Atom | X           | Y           | Z          |
|------|------------|-------------|------------|------|-------------|-------------|------------|
| Li   | 0.00000000 | 0.00000000  | 0.00000000 | C    | 5.05193591  | -3.90326165 | 7.28607937 |
| O    | 0.00000000 | 0.00000000  | 2.15556350 | C    | 4.16581346  | -4.74212579 | 6.61001325 |
| C    | 1.20062383 | 0.00000000  | 2.47767107 | C    | 3.24895865  | -4.20712962 | 5.70238675 |
| N    | 1.97103832 | -1.20781342 | 2.19458027 | H    | 2.55228897  | -4.86689863 | 5.18944977 |
| C    | 2.91332871 | -1.83538791 | 3.12487302 | H    | 4.18280963  | -5.81364856 | 6.79089025 |
| C    | 3.39473684 | -3.02261048 | 2.26570781 | H    | 5.76454979  | -4.31693908 | 7.99440090 |
| H    | 4.34717093 | -2.81121555 | 1.76799426 | H    | 5.69261424  | -1.86426901 | 7.58114424 |
| H    | 3.48136648 | -3.95411249 | 2.82745700 | H    | 4.06256665  | -0.92145872 | 5.98018721 |
| O    | 2.38430583 | -3.19258906 | 1.25280409 | C    | 1.93624316  | 1.13447809  | 2.88014613 |
| C    | 1.64175263 | -2.05449704 | 1.16783916 | H    | 2.94347803  | 0.96294765  | 3.25321074 |
| O    | 0.84492345 | -1.87762509 | 0.25979921 | C    | 1.17052078  | 2.28514934  | 3.49199597 |
| H    | 3.74685984 | -1.16141202 | 3.34290784 | H    | 0.37923757  | 2.62165650  | 2.81386095 |
| C    | 2.23046005 | -2.24554761 | 4.45088017 | H    | 0.68831756  | 2.00963020  | 4.44088752 |
| H    | 1.74862970 | -1.35126303 | 4.86388087 | H    | 1.82928584  | 3.13569423  | 3.69680825 |
| H    | 1.43236340 | -2.96276377 | 4.22396484 | O    | -2.02954268 | 0.27161761  | 0.01905202 |
| C    | 3.20064796 | -2.82872548 | 5.45493994 | C    | -2.84930198 | -0.49856166 | 0.93069781 |
| C    | 4.09441295 | -1.99653035 | 6.14618464 | C    | -3.76435425 | 0.50803037  | 1.64010979 |
| C    | 5.01219787 | -2.52660747 | 7.05238657 | C    | -2.93600264 | 1.80071258  | 1.57703249 |

|   |             |             |             |
|---|-------------|-------------|-------------|
| C | -2.28123078 | 1.68427402  | 0.20172996  |
| H | -1.32300433 | 2.20467757  | 0.12318397  |
| H | -2.94918912 | 2.03320270  | -0.59875597 |
| H | -2.16317218 | 1.79208208  | 2.35171284  |
| H | -3.53879481 | 2.70834845  | 1.68284199  |
| H | -4.00457651 | 0.19847548  | 2.66180519  |
| H | -4.70678206 | 0.62958898  | 1.09218573  |
| H | -3.40179096 | -1.24568747 | 0.34997682  |
| H | -2.18037927 | -1.00488010 | 1.63243841  |
| O | 1.22715139  | 1.48237075  | 0.17240745  |
| C | 2.30382453  | 1.64579631  | 0.82786101  |
| C | 2.89188560  | 3.06244442  | 0.93600396  |
| H | 2.14177250  | 3.70288202  | 1.41620274  |
| C | 3.10514990  | 3.59528557  | -0.49581938 |
| H | 3.47114950  | 4.62910691  | -0.47427359 |
| H | 3.84826854  | 2.99126014  | -1.03406897 |
| H | 2.16902652  | 3.56452116  | -1.05908314 |
| C | 4.20300843  | 3.11866115  | 1.72868316  |
| H | 4.93820175  | 2.41460509  | 1.31600851  |
| H | 4.64593702  | 4.12003153  | 1.67537859  |
| H | 4.06279806  | 2.87469001  | 2.78609371  |
| H | 3.09149910  | 0.86811514  | 0.74421368  |
| O | -0.00556598 | -0.11678488 | -2.09442228 |
| C | 1.19653392  | 0.16940843  | -2.82034110 |
| C | 1.80293621  | -1.20417751 | -3.16863974 |
| C | 0.58919039  | -2.17343267 | -3.10212171 |
| C | -0.59134782 | -1.25367396 | -2.73730822 |
| H | -1.30584452 | -1.69273205 | -2.03858001 |
| H | -1.13331794 | -0.92146235 | -3.63642608 |
| H | 0.74200968  | -2.91887535 | -2.31877819 |
| H | 0.41478786  | -2.69727551 | -4.04733109 |
| H | 2.55964922  | -1.49056634 | -2.43274217 |
| H | 2.28137023  | -1.19345537 | -4.15320429 |
| H | 0.94065681  | 0.73102377  | -3.73233590 |
| H | 1.81125989  | 0.79588538  | -2.17377396 |

**Table 15.** Geometric coordinates and thermally corrected MP2 energies for the transition state leading to (*S,R*)-**6** from **5** monomer with three THF

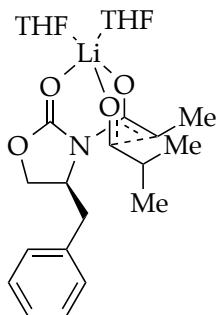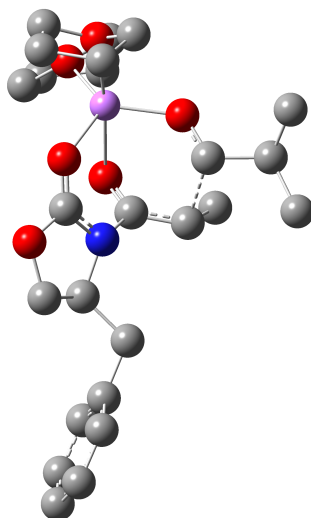

G = -1488.69661 Hartree

G<sub>MP2</sub> = -931169.8852 kcal/mol

ΔG<sub>MP2</sub> = 7.995805982 kcal/mol Li vs. **5** monomer with three THF

| Atom | X          | Y           | Z           | Atom | X           | Y           | Z           |
|------|------------|-------------|-------------|------|-------------|-------------|-------------|
| Li   | 0.00000000 | 0.00000000  | 0.00000000  | H    | 3.01150355  | 0.96856660  | -3.13050929 |
| O    | 0.00000000 | 0.00000000  | -2.25660410 | C    | 1.27555155  | 2.36057617  | -3.33316593 |
| C    | 1.21404718 | 0.00000000  | -2.52403508 | H    | 0.51573312  | 2.69578007  | -2.61838346 |
| N    | 1.94433679 | -1.27354972 | -2.33066760 | H    | 0.76093430  | 2.16077634  | -4.28350353 |
| C    | 2.37672209 | -2.10744518 | -3.46781413 | H    | 1.97307187  | 3.18697655  | -3.50611929 |
| C    | 2.72267043 | -3.41222295 | -2.72885880 | O    | -2.04055754 | 0.16611837  | -0.09048972 |
| H    | 3.78674817 | -3.45899452 | -2.46848191 | C    | -2.80922939 | -0.61497239 | -1.03685287 |
| H    | 2.44575335 | -4.31299263 | -3.27750232 | C    | -3.69916067 | 0.37879665  | -1.79946825 |
| O    | 1.95872335 | -3.36479509 | -1.51081338 | C    | -2.93074981 | 1.70088305  | -1.64291132 |
| C    | 1.56692481 | -2.08394943 | -1.28677212 | C    | -2.36963634 | 1.56624215  | -0.22954198 |
| O    | 0.98253787 | -1.76822780 | -0.26146948 | H    | -1.45452660 | 2.13917887  | -0.05891491 |
| C    | 3.54641449 | -1.54089452 | -4.28916699 | H    | -3.11368613 | 1.83896258  | 0.53299486  |
| H    | 3.23308788 | -0.58609508 | -4.72362526 | H    | -2.10478488 | 1.74592815  | -2.35897369 |
| H    | 4.38109595 | -1.32795742 | -3.61073005 | H    | -3.56278792 | 2.58625940  | -1.76575902 |
| C    | 3.98200760 | -2.49142074 | -5.38712335 | H    | -3.84169284 | 0.08535070  | -2.84385860 |
| C    | 5.14494527 | -3.26246193 | -5.25954276 | H    | -4.68837116 | 0.45292787  | -1.33146164 |
| C    | 5.52679477 | -4.15598577 | -6.26242629 | H    | -3.38645936 | -1.36386798 | -0.48235681 |
| C    | 4.74841219 | -4.29191302 | -7.41224199 | H    | -2.09960991 | -1.11765148 | -1.69904749 |
| C    | 3.58923412 | -3.52582919 | -7.55463254 | O    | 1.16475119  | 1.50762092  | -0.15390427 |
| C    | 3.21203823 | -2.63365672 | -6.55128187 | C    | 2.29838605  | 1.54576492  | -0.72711988 |
| H    | 2.31379456 | -2.03232561 | -6.67589674 | C    | 3.05596381  | 2.88493213  | -0.75956980 |
| H    | 2.98131924 | -3.61860865 | -8.45072965 | H    | 2.40261570  | 3.62994469  | -1.22947016 |
| H    | 5.04525265 | -4.98466937 | -8.19494872 | C    | 3.27863501  | 3.32445551  | 0.70279644  |
| H    | 6.43518193 | -4.74116186 | -6.14594308 | H    | 3.77723779  | 4.30067188  | 0.74208631  |
| H    | 5.76422081 | -3.15370335 | -4.37178896 | H    | 3.91424381  | 2.60558841  | 1.23774482  |
| H    | 1.51945589 | -2.27052061 | -4.13820763 | H    | 2.32465508  | 3.39640435  | 1.23158260  |
| C    | 1.99168387 | 1.14031899  | -2.80114491 | C    | 4.39345659  | 2.82378129  | -1.50677955 |



|   |             |             |             |
|---|-------------|-------------|-------------|
| H | 5.01173326  | 1.99512410  | -1.13609099 |
| H | 4.96313194  | 3.74794649  | -1.35443420 |
| H | 4.26557066  | 2.69052706  | -2.58527706 |
| H | 2.98089075  | 0.67999141  | -0.60739333 |
| O | -0.09406539 | -0.15476709 | 2.09014696  |
| C | 1.05938239  | 0.19355024  | 2.86491347  |
| C | 1.78382425  | -1.13799939 | 3.11420243  |
| C | 0.63595484  | -2.18467803 | 3.09493195  |
| C | -0.60138955 | -1.36877771 | 2.65837845  |
| H | -1.21190501 | -1.85531064 | 1.89544971  |
| H | -1.24184541 | -1.12307382 | 3.51881876  |
| H | 0.85115668  | -2.97757297 | 2.37525447  |
| H | 0.47808560  | -2.64723940 | 4.07455094  |
| H | 2.48886363  | -1.33781086 | 2.30260627  |
| H | 2.34094135  | -1.13306260 | 4.05647359  |
| H | 0.73511466  | 0.65423648  | 3.81163668  |
| H | 1.62296298  | 0.92268598  | 2.28239641  |

**Table 16.** Geometric coordinates and thermally corrected MP2 energies for the transition state leading to (*R,R*)-6 from 5 monomer with three THF

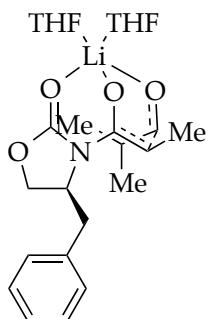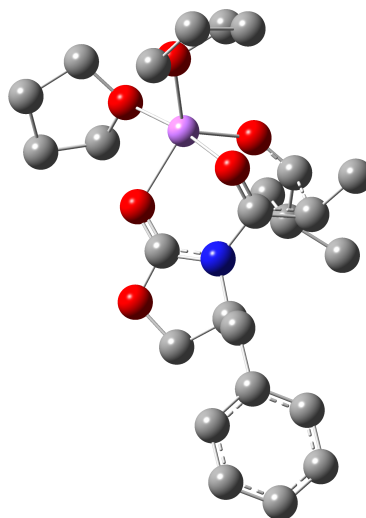

$G = -1488.69723$  Hartree

$G_{\text{MP2}} = -931170.4794$  kcal/mol

$\Delta G_{\text{MP2}} = 7.40160666$  kcal/mol Li vs. 5 monomer with three THF

| Atom | X          | Y           | Z          | Atom | X           | Y           | Z           |
|------|------------|-------------|------------|------|-------------|-------------|-------------|
| Li   | 0.00000000 | 0.00000000  | 0.00000000 | C    | 1.22255389  | 2.28674449  | 3.57596117  |
| O    | 0.00000000 | 0.00000000  | 2.21647090 | H    | 0.32886753  | 2.55832159  | 3.00594657  |
| C    | 1.19841668 | 0.00000000  | 2.53166518 | H    | 0.90322056  | 2.04252005  | 4.59930153  |
| N    | 1.95768395 | -1.21878875 | 2.26358313 | H    | 1.86706679  | 3.17134601  | 3.63659206  |
| C    | 2.89267814 | -1.84583839 | 3.20222213 | O    | -2.01370737 | 0.43824931  | 0.07915449  |
| C    | 3.35173700 | -3.05484937 | 2.36173616 | C    | -2.85598360 | -0.37985848 | 0.92715654  |
| H    | 4.30424441 | -2.86578605 | 1.85533596 | C    | -3.72894814 | 0.59401790  | 1.72736868  |
| H    | 3.42790331 | -3.97796005 | 2.93863576 | C    | -2.83989719 | 1.84572406  | 1.79438854  |
| O    | 2.33337980 | -3.22745198 | 1.35715634 | C    | -2.18115195 | 1.83865451  | 0.41636210  |
| C    | 1.60874220 | -2.07945611 | 1.25451929 | H    | -1.19031610 | 2.29844188  | 0.39233530  |
| O    | 0.81249110 | -1.90513237 | 0.34584292 | H    | -2.82323357 | 2.30773709  | -0.34284970 |
| H    | 3.73728655 | -1.18135973 | 3.40591535 | H    | -2.07502690 | 1.72368240  | 2.56674818  |
| C    | 2.20681392 | -2.22279671 | 4.53677101 | H    | -3.40136550 | 2.76534416  | 1.98780690  |
| H    | 1.74921817 | -1.31213331 | 4.94156364 | H    | -3.99236368 | 0.19739286  | 2.71264569  |
| H    | 1.38980723 | -2.92253353 | 4.32311329 | H    | -4.65976207 | 0.81214066  | 1.18940937  |
| C    | 3.16716511 | -2.81828219 | 5.54330493 | H    | -3.43681939 | -1.05386806 | 0.28755662  |
| C    | 4.08904676 | -2.00194452 | 6.21625995 | H    | -2.20416427 | -0.96986029 | 1.57837421  |
| C    | 4.99763672 | -2.54488717 | 7.12410788 | O    | 1.16943288  | 1.47429573  | 0.24490307  |
| C    | 4.99959036 | -3.91854667 | 7.37785776 | C    | 2.17515865  | 1.82938848  | 0.94419559  |
| C    | 4.08523631 | -4.74153112 | 6.72007257 | C    | 3.58201846  | 1.34791445  | 0.52416020  |
| C    | 3.17780346 | -4.19378142 | 5.81062505 | H    | 3.62148310  | 0.25645231  | 0.64761559  |
| H    | 2.45920782 | -4.84071259 | 5.31179032 | C    | 3.77429997  | 1.65716553  | -0.97345085 |
| H    | 4.07298556 | -5.81035079 | 6.91662649 | H    | 3.75092503  | 2.73995720  | -1.15413821 |
| H    | 5.70498036 | -4.34208135 | 8.08757898 | H    | 4.74224840  | 1.28115690  | -1.32811296 |
| H    | 5.70046725 | -1.89472203 | 7.63843550 | H    | 2.97737976  | 1.20487565  | -1.56813567 |
| H    | 4.08673946 | -0.92896527 | 6.03480289 | C    | 4.71049727  | 1.99610269  | 1.33717297  |
| C    | 1.94943625 | 1.14245185  | 2.90167631 | H    | 4.67030988  | 1.74171626  | 2.40111803  |
| H    | 2.95787300 | 0.95468083  | 3.26255061 | H    | 5.69079789  | 1.68287776  | 0.95863333  |

|   |             |             |             |
|---|-------------|-------------|-------------|
| H | 4.66499990  | 3.09025998  | 1.25772980  |
| H | 2.19047682  | 2.87870641  | 1.30301667  |
| O | -0.04980516 | -0.33450214 | -2.07861799 |
| C | 1.03563052  | -1.03789795 | -2.69450917 |
| C | 0.47769347  | -2.43416890 | -3.02332444 |
| C | -1.05434297 | -2.19757574 | -3.14130400 |
| C | -1.21693364 | -0.69699011 | -2.82617535 |
| H | -2.08009511 | -0.44632132 | -2.20950422 |
| H | -1.25010899 | -0.10182465 | -3.75198372 |
| H | -1.59528664 | -2.80928256 | -2.41318536 |
| H | -1.44410185 | -2.44209100 | -4.13457847 |
| H | 0.69641926  | -3.12247159 | -2.20390071 |
| H | 0.91482089  | -2.84034649 | -3.94090681 |
| H | 1.34295089  | -0.50132977 | -3.60557439 |
| H | 1.86515626  | -1.04578484 | -1.98677417 |

**Table 17.** Geometric coordinates and thermally corrected MP2 energies for the transition state leading to (*S,S*)-6 from 5 monomer with three THF

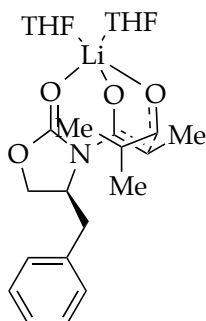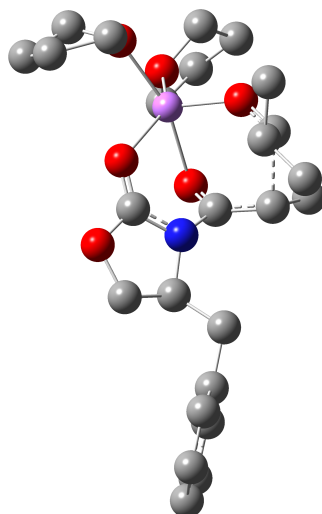

G = -1488.692527 Hartree

G<sub>MP2</sub> = -931168.3235 kcal/mol

ΔG<sub>MP2</sub> = 9.557477753 kcal/mol Li vs. 5 monomer with three THF

| Atom | X          | Y           | Z           | Atom | X           | Y           | Z           |
|------|------------|-------------|-------------|------|-------------|-------------|-------------|
| Li   | 0.00000000 | 0.00000000  | 0.00000000  | H    | 7.72599063  | 1.94707408  | -5.47477474 |
| O    | 0.00000000 | 0.00000000  | -2.17940160 | H    | 7.71143124  | 0.71710313  | -7.63785480 |
| C    | 1.03098976 | 0.00000000  | -2.82972230 | H    | 6.22952858  | -1.26193924 | -7.91694192 |
| N    | 2.30134068 | -0.31919064 | -2.39923015 | H    | 4.77478005  | -1.99599598 | -6.05681722 |
| C    | 2.58134067 | -0.18688154 | -0.95843018 | H    | 3.64316978  | 1.08955711  | -3.21149919 |
| O    | 1.99453064 | 0.72388965  | -0.35528855 | O    | -0.29287517 | 1.29514530  | 1.60901190  |
| C    | 3.30816999 | -1.23211913 | -0.33299990 | C    | 0.60393030  | 2.39084086  | 1.91142958  |
| H    | 3.87761208 | -1.88021504 | -0.99177897 | C    | 0.69694566  | 2.44651451  | 3.43872278  |
| C    | 3.96006005 | -0.91434511 | 0.99934466  | C    | 0.50119781  | 0.97161192  | 3.82067580  |
| H    | 3.21364931 | -0.52933057 | 1.70058169  | C    | -0.54399440 | 0.51322389  | 2.80337458  |
| H    | 4.75406778 | -0.16055402 | 0.90747455  | H    | -0.45716729 | -0.54156866 | 2.53643227  |
| H    | 4.40746865 | -1.81520624 | 1.43410995  | H    | -1.56520274 | 0.72351996  | 3.15012272  |
| C    | 3.28153674 | 0.07327476  | -3.42934792 | H    | 1.43292165  | 0.41298871  | 3.67622451  |
| C    | 2.37010233 | 0.09592224  | -4.66877263 | H    | 0.17148051  | 0.82908035  | 4.85466219  |
| H    | 2.38755970 | -0.86354875 | -5.19922746 | H    | 1.64966149  | 2.86192111  | 3.78180246  |
| H    | 2.60298310 | 0.89955032  | -5.36800918 | H    | -0.11108819 | 3.05969594  | 3.85643076  |
| O    | 1.04373268 | 0.30677748  | -4.15340441 | H    | 0.18884141  | 3.30256312  | 1.46798939  |
| C    | 4.49206011 | -0.86312602 | -3.57546167 | H    | 1.57023109  | 2.17601485  | 1.44689557  |
| H    | 5.04515497 | -0.86578498 | -2.63035001 | O    | 0.80375897  | -1.56706342 | 0.67991972  |
| H    | 4.12837328 | -1.88431342 | -3.73965443 | C    | 1.71966308  | -2.34417893 | 0.23544061  |
| C    | 5.40567150 | -0.43728212 | -4.70811600 | H    | 2.34028937  | -2.86862003 | 0.99336201  |
| C    | 5.41239803 | -1.12378245 | -5.92956786 | C    | 1.36152673  | -3.29813862 | -0.92651478 |
| C    | 6.23599599 | -0.71222760 | -6.97943102 | H    | 0.99343839  | -2.69189404 | -1.76341080 |
| C    | 7.06803633 | 0.39661207  | -6.82302032 | C    | 0.20055063  | -4.18946529 | -0.43992122 |
| C    | 7.07476072 | 1.08742544  | -5.60912266 | H    | 0.52302840  | -4.82834517 | 0.39346469  |
| C    | 6.25219569 | 0.67198335  | -4.56232957 | H    | -0.15155500 | -4.84644179 | -1.24503945 |
| H    | 6.27380821 | 1.20951895  | -3.61653087 | H    | -0.63509969 | -3.57962804 | -0.08779449 |

|   |             |             |             |
|---|-------------|-------------|-------------|
| C | 2.52504705  | -4.17745912 | -1.40286595 |
| H | 3.28371810  | -3.61346381 | -1.95420758 |
| H | 2.16328459  | -4.97254608 | -2.06601863 |
| H | 3.02201211  | -4.66392116 | -0.55266642 |
| O | -2.10832771 | -0.22024823 | -0.08586447 |
| C | -2.64767231 | -1.16984506 | -1.02142706 |
| C | -3.28640581 | -0.34589612 | -2.16638574 |
| C | -3.24341748 | 1.11253925  | -1.64452043 |
| C | -2.95604107 | 0.93344429  | -0.15100680 |
| H | -2.41594664 | 1.75512092  | 0.32124110  |
| H | -3.88271709 | 0.74090474  | 0.41376415  |
| H | -2.41981515 | 1.65603658  | -2.11613271 |
| H | -4.17194218 | 1.66199612  | -1.82955066 |
| H | -2.71686470 | -0.44653849 | -3.09271389 |
| H | -4.31177177 | -0.67844505 | -2.35912682 |
| H | -3.39692509 | -1.78898306 | -0.50734758 |
| H | -1.82303933 | -1.80549418 | -1.34438808 |

**Table 18.** Geometric coordinates and thermally corrected MP2 energies for the transition state leading to (*R,S*)-6 from 5 monomer with three THF with 3 THF in the transition state

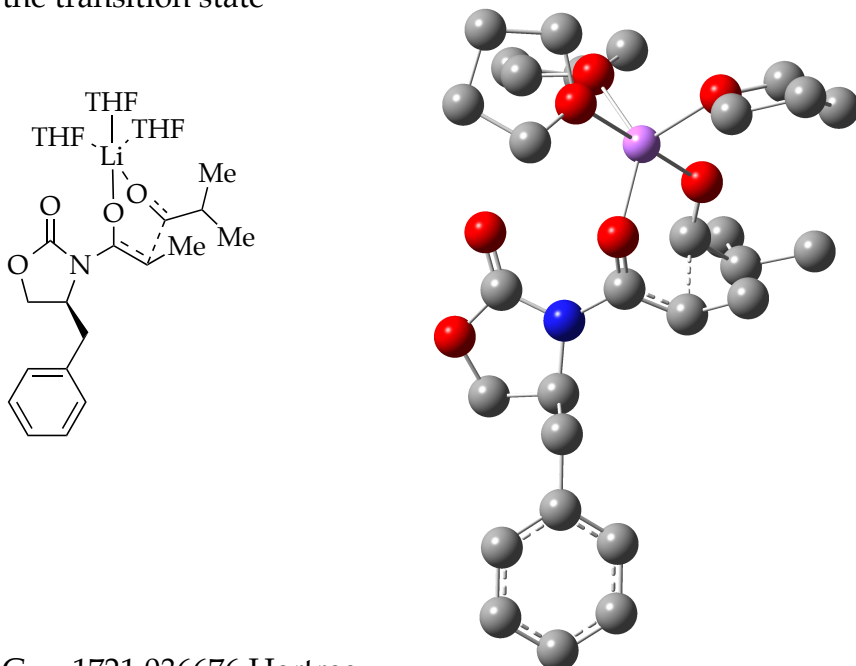

G = -1721.036676 Hartree

G<sub>MP2</sub> = -1076482.214 kcal/mol

ΔG<sub>MP2</sub> = 7.95713593 kcal/mol Li vs. 5 monomer with three THF

| Atom | X          | Y           | Z           | Atom | X           | Y           | Z           |
|------|------------|-------------|-------------|------|-------------|-------------|-------------|
| Li   | 0.00000000 | 0.00000000  | 0.00000000  | H    | 3.06813681  | -0.69917036 | 4.59677431  |
| O    | 0.00000000 | 0.00000000  | 1.99497850  | O    | 0.14798793  | -2.81692055 | 2.20089505  |
| C    | 1.04279733 | 0.00000000  | 2.68803939  | C    | 1.95807195  | 1.07278461  | 2.72827431  |
| N    | 1.40616301 | -1.21450162 | 3.38341758  | C    | 1.42118630  | 2.45048873  | 2.41886995  |
| C    | 0.87775129 | -2.46726227 | 3.09844861  | H    | 2.14339141  | 3.22566283  | 2.69675190  |
| O    | 1.33512914 | -3.35999010 | 4.03694077  | H    | 0.48479957  | 2.66010718  | 2.95506122  |
| C    | 2.36377360 | -2.74099377 | 4.82163055  | H    | 1.20692343  | 2.54749112  | 1.34680277  |
| H    | 2.27762366 | -3.09175440 | 5.85172781  | H    | 2.79539959  | 1.01157338  | 3.41708783  |
| H    | 3.34006558 | -3.03765402 | 4.41977499  | O    | 1.94334443  | 0.69282920  | -0.06041257 |
| C    | 2.11763113 | -1.23283999 | 4.66823050  | C    | 2.81300431  | 0.40144950  | 0.80869105  |
| C    | 1.26405276 | -0.61650073 | 5.80321192  | H    | 2.87750797  | -0.64525028 | 1.16370871  |
| H    | 0.96081291 | 0.38561315  | 5.47879834  | C    | 4.20218633  | 1.06542647  | 0.78918968  |
| H    | 0.34888406 | -1.21170412 | 5.90840013  | H    | 4.60672371  | 1.03753767  | 1.80921852  |
| C    | 2.00123614 | -0.53892302 | 7.12203228  | C    | 4.18728714  | 2.51078160  | 0.28487225  |
| C    | 2.98794019 | 0.43743205  | 7.32740143  | H    | 5.20772746  | 2.90950865  | 0.23529187  |
| C    | 3.69496347 | 0.50099124  | 8.52765352  | H    | 3.60059237  | 3.16343556  | 0.93578856  |
| C    | 3.42621803 | -0.41316748 | 9.54917805  | H    | 3.75304961  | 2.56078525  | -0.71889786 |
| C    | 2.44456669 | -1.38636456 | 9.36109657  | C    | 5.11950738  | 0.19439747  | -0.09639873 |
| C    | 1.73973058 | -1.44697199 | 8.15688098  | H    | 5.15497209  | -0.84360230 | 0.25673084  |
| H    | 0.96724241 | -2.20124934 | 8.02256161  | H    | 6.14509152  | 0.58304279  | -0.09410474 |
| H    | 2.22211970 | -2.09737511 | 10.15249360 | H    | 4.76304129  | 0.18643180  | -1.13337214 |
| H    | 3.97427387 | -0.36263604 | 10.48613800 | O    | -2.08058874 | -0.76248242 | 0.06619070  |
| H    | 4.45195955 | 1.26818622  | 8.66837984  | C    | -2.88711758 | -1.11449246 | -1.06222473 |
| H    | 3.19497528 | 1.16110815  | 6.54141666  | C    | -3.66068186 | -2.40093374 | -0.66844405 |

|   |             |             |             |
|---|-------------|-------------|-------------|
| C | -3.29365776 | -2.61130515 | 0.82142878  |
| C | -2.75419859 | -1.24163718 | 1.23727957  |
| H | -3.57471531 | -0.55268242 | 1.50074950  |
| H | -2.01706176 | -1.26178061 | 2.03708818  |
| H | -4.14716391 | -2.93173859 | 1.42754757  |
| H | -2.50058281 | -3.35714044 | 0.92904278  |
| H | -4.73863433 | -2.25875975 | -0.79999286 |
| H | -3.36922608 | -3.25833513 | -1.28291466 |
| H | -2.21136049 | -1.24154244 | -1.91010798 |
| H | -3.58325947 | -0.29273306 | -1.29052409 |
| O | 0.37917195  | -1.50297591 | -1.45702329 |
| C | 0.21076989  | -2.91453101 | -1.18491594 |
| C | 1.45761169  | -3.62857452 | -1.75521809 |
| C | 2.40790647  | -2.47000239 | -2.11392770 |
| C | 1.42947400  | -1.33826763 | -2.41953895 |
| H | 1.84419808  | -0.34020686 | -2.27340076 |
| H | 1.02099925  | -1.42732463 | -3.43924942 |
| H | 3.02653197  | -2.19316406 | -1.25360803 |
| H | 3.07038864  | -2.70230828 | -2.95403784 |
| H | 1.89560110  | -4.32446630 | -1.03373118 |
| H | 1.19896450  | -4.20191706 | -2.65264082 |
| H | -0.70924319 | -3.26666320 | -1.66975090 |
| H | 0.10765770  | -3.02245543 | -0.10464825 |
| O | -0.79727283 | 1.68413780  | -0.94883754 |
| C | -1.82024663 | 2.40152166  | -0.22368273 |
| C | -1.80470486 | 3.82756193  | -0.78092206 |
| C | -0.32896253 | 4.00204271  | -1.17085239 |
| C | 0.03025036  | 2.60792998  | -1.69111826 |
| H | -0.20654312 | 2.50816332  | -2.75994204 |
| H | 1.07002359  | 2.32633679  | -1.51672608 |
| H | -0.16544136 | 4.78461944  | -1.91848926 |
| H | 0.27217340  | 4.24321656  | -0.28677678 |
| H | -2.44545423 | 3.90169281  | -1.66817317 |
| H | -2.15179996 | 4.56471868  | -0.05011810 |
| H | -1.57107724 | 2.37860251  | 0.84417703  |
| H | -2.77132572 | 1.88276870  | -0.36883894 |

**Table 19.** Geometric coordinates and thermally corrected MP2 energies for the transition state leading to (*R,S*)-**6** from **5** dimer with three THF

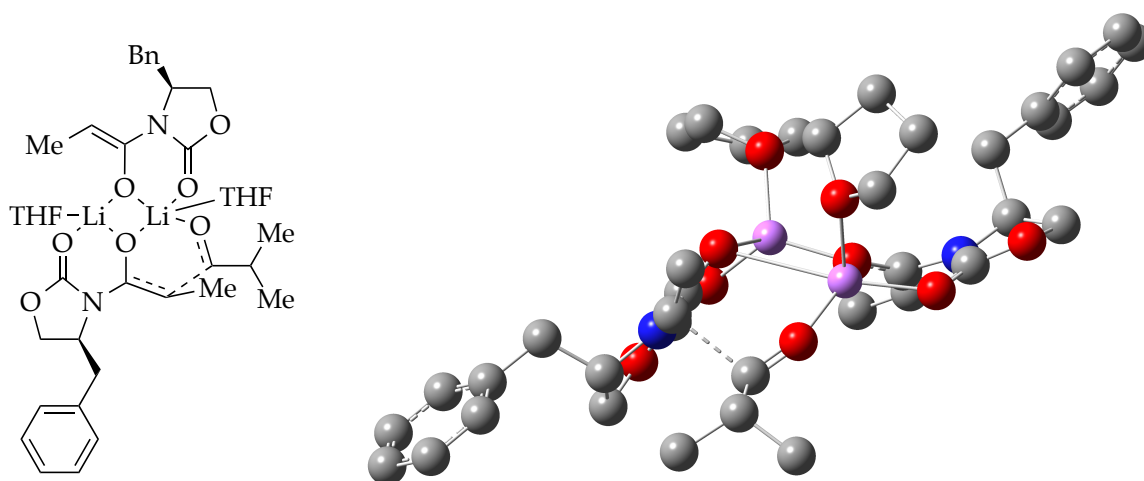

$G = -2280.369128$  Hartree

$G_{\text{MP2}} = -1426404.974$  kcal/mol

$\Delta G_{\text{MP2}} = 6.829416293$  kcal/mol vs. **5** dimer with three THF

| Atom | X          | Y           | Z           | Atom | X           | Y           | Z           |
|------|------------|-------------|-------------|------|-------------|-------------|-------------|
| Li   | 0.00000000 | 0.00000000  | 0.00000000  | H    | 9.17754522  | -6.99735482 | -1.33089690 |
| O    | 0.00000000 | 0.00000000  | 1.95615030  | H    | 7.60744593  | -5.87868162 | -2.90399029 |
| Li   | 1.84171295 | 0.00000000  | 2.28282029  | H    | 6.18130865  | -4.01910028 | -2.12352417 |
| O    | 2.80646069 | -0.15198414 | 0.65433834  | C    | 3.38503864  | -1.36017603 | -1.28539027 |
| C    | 3.30050530 | -1.16622317 | 0.11063726  | H    | 4.02554629  | -2.16153763 | -1.63481755 |
| N    | 3.67461626 | -2.27569503 | 0.96349257  | C    | 3.32612094  | -0.12631453 | -2.15625747 |
| C    | 4.54169514 | -3.39605290 | 0.56060012  | H    | 2.39588780  | 0.42025865  | -1.97322574 |
| C    | 4.32352186 | -4.34390410 | 1.74794888  | H    | 4.16085277  | 0.56168317  | -1.95995632 |
| H    | 3.50638275 | -5.05070535 | 1.56858171  | H    | 3.36730076  | -0.39840525 | -3.21675506 |
| H    | 5.22131936 | -4.88845741 | 2.04251772  | O    | 2.42604065  | 1.56405243  | 3.38314446  |
| O    | 3.94126129 | -3.47538697 | 2.83278261  | C    | 1.84956502  | 1.74363687  | 4.68782760  |
| C    | 3.43872796 | -2.32397170 | 2.31898544  | C    | 2.84909751  | 1.09612348  | 5.65941509  |
| O    | 2.88181357 | -1.50951401 | 3.03989990  | C    | 4.20893438  | 1.19442826  | 4.91313362  |
| H    | 4.17270494 | -3.84853311 | -0.36170238 | C    | 3.83920555  | 1.78234313  | 3.53595424  |
| C    | 6.01369111 | -2.94984222 | 0.38530019  | H    | 4.33002745  | 1.29843219  | 2.68965196  |
| H    | 6.02822253 | -2.11624647 | -0.32564903 | H    | 4.03764855  | 2.86311517  | 3.49456570  |
| H    | 6.37198733 | -2.55824418 | 1.34537811  | H    | 4.65760679  | 0.20384257  | 4.80520694  |
| C    | 6.91432226 | -4.06816316 | -0.09366101 | H    | 4.92626181  | 1.83460668  | 5.43589436  |
| C    | 6.85730010 | -4.50795154 | -1.42486054 | H    | 2.58416274  | 0.04959895  | 5.83107230  |
| C    | 7.66409588 | -5.55539468 | -1.86797422 | H    | 2.85975084  | 1.60603998  | 6.62751663  |
| C    | 8.54664849 | -6.18290962 | -0.98556233 | H    | 1.73638886  | 2.82036790  | 4.88452903  |
| C    | 8.61738309 | -5.75299700 | 0.33960099  | H    | 0.86269965  | 1.27588900  | 4.67487433  |
| C    | 7.80652676 | -4.70446341 | 0.77967690  | C    | -1.08765912 | -0.07900740 | 2.66904122  |
| H    | 7.87645617 | -4.36686102 | 1.81169055  | N    | -2.22679636 | 0.68739212  | 2.14945442  |
| H    | 9.30606257 | -6.22944094 | 1.03229085  | C    | -3.06051487 | 1.57376022  | 2.96382551  |



|   |             |             |             |
|---|-------------|-------------|-------------|
| C | -4.16242387 | 1.92442350  | 1.94724626  |
| H | -5.03959465 | 1.27650688  | 2.05478571  |
| H | -4.47868238 | 2.96827931  | 1.98952754  |
| O | -3.56820187 | 1.67692581  | 0.66018242  |
| C | -2.50834724 | 0.82605103  | 0.82654320  |
| O | -1.95695787 | 0.31442151  | -0.13795613 |
| H | -3.48490164 | 1.03191547  | 3.81286602  |
| C | -2.26656883 | 2.79253676  | 3.48984032  |
| H | -1.38224692 | 2.40163658  | 4.00585674  |
| H | -1.91031070 | 3.37494042  | 2.63119930  |
| C | -3.07604475 | 3.66487095  | 4.42341246  |
| C | -3.59716792 | 4.89541365  | 4.00182187  |
| C | -4.36805053 | 5.68196487  | 4.86070611  |
| C | -4.63177782 | 5.24742915  | 6.15981857  |
| C | -4.11632782 | 4.02405755  | 6.59491260  |
| C | -3.34595324 | 3.24269536  | 5.73439245  |
| H | -2.94005991 | 2.29551364  | 6.08439703  |
| H | -4.31070355 | 3.68032775  | 7.60761612  |
| H | -5.23016907 | 5.85817926  | 6.83043704  |
| H | -4.75872048 | 6.63519668  | 4.51411731  |
| H | -3.38750673 | 5.24679536  | 2.99359824  |
| C | -1.30868640 | -0.74286974 | 3.83210361  |
| C | -0.29567565 | -1.58249577 | 4.55568679  |
| H | -0.06656883 | -1.19594346 | 5.56209917  |
| H | -0.66264590 | -2.60911212 | 4.70133464  |
| H | 0.64684951  | -1.65405793 | 4.00694459  |
| H | -2.31408330 | -0.72689066 | 4.24416492  |
| O | 0.50964454  | 1.87532694  | -0.73283493 |
| C | 1.22036064  | 2.92061760  | -0.05809843 |
| C | 0.30274723  | 4.16759802  | -0.11853179 |
| C | -0.80058968 | 3.77377283  | -1.13711294 |
| C | -0.24452423 | 2.49665889  | -1.77850297 |
| H | 0.42107945  | 2.72823666  | -2.62495222 |
| H | -1.00700885 | 1.78534321  | -2.09775532 |
| H | -1.00017031 | 4.55858711  | -1.87351161 |
| H | -1.73954943 | 3.54439080  | -0.62419227 |
| H | 0.86355287  | 5.04983103  | -0.44387869 |
| H | -0.12575436 | 4.39802393  | 0.86204238  |
| H | 1.43444994  | 2.57110909  | 0.95305945  |
| H | 2.17237779  | 3.10273015  | -0.57676025 |
| O | 0.62362293  | -1.27445058 | -1.19489910 |
| C | 1.43758282  | -2.19335978 | -1.48800102 |
| C | 1.44304343  | -2.72414225 | -2.93584209 |
| H | 1.61947946  | -1.87161215 | -3.60312100 |
| C | 0.02427696  | -3.25815698 | -3.22569084 |
| H | -0.05695029 | -3.59416067 | -4.26677144 |
| H | -0.21275857 | -4.11361630 | -2.57896923 |
| H | -0.72227475 | -2.48129594 | -3.04400707 |
| C | 2.48490350  | -3.81682883 | -3.20328658 |
| H | 2.42937701  | -4.60620132 | -2.44041986 |
| H | 2.30423777  | -4.29439268 | -4.17334826 |
| H | 3.50919469  | -3.42991084 | -3.21796883 |
| H | 1.61411585  | -3.00185540 | -0.74592743 |

**Table 20.** Geometric coordinates and thermally corrected MP2 energies for the transition state leading to (*S,R*)-**6** from **5** dimer with three THF

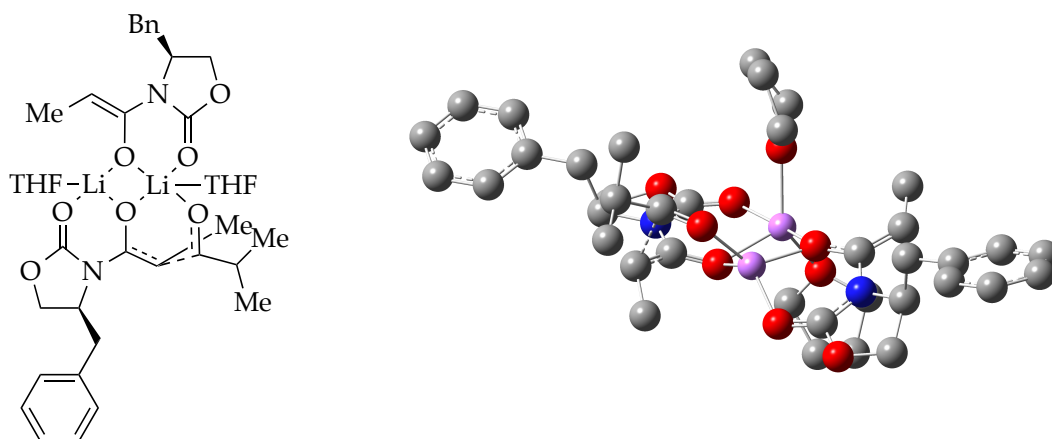

G = -2280.360219 Hartree

G<sub>MP2</sub> = -1426402.109 kcal/mol

ΔG<sub>MP2</sub> = 9.694603507 kcal/mol vs. **5** dimer with three THF

| Atom | X           | Y           | Z           | Atom | X           | Y           | Z           |
|------|-------------|-------------|-------------|------|-------------|-------------|-------------|
| Li   | 0.00000000  | 0.00000000  | 0.00000000  | C    | -5.55414705 | 1.59210591  | -4.03244176 |
| O    | 0.00000000  | 0.00000000  | 1.98556460  | C    | -5.38269945 | 2.35338784  | -5.19632977 |
| C    | 0.78040021  | 0.00000000  | 3.01877274  | C    | -6.40930556 | 2.46927916  | -6.13608214 |
| N    | 0.26248218  | -0.70637054 | 4.19604943  | C    | -7.62703854 | 1.82243376  | -5.92473295 |
| C    | 0.87540069  | -0.64283627 | 5.52968200  | C    | -7.81347519 | 1.06395715  | -4.76662883 |
| C    | 0.18877664  | -1.83633335 | 6.20513095  | C    | -6.78636088 | 0.95205307  | -3.83016536 |
| H    | 0.77161769  | -2.75940072 | 6.10378181  | H    | -6.94678851 | 0.36939194  | -2.92517975 |
| H    | -0.04337018 | -1.66776353 | 7.25793751  | H    | -8.76205416 | 0.56412841  | -4.58940704 |
| O    | -1.04384806 | -1.99045671 | 5.48359173  | H    | -8.42804307 | 1.91276349  | -6.65328000 |
| C    | -0.91232504 | -1.40720694 | 4.25695037  | H    | -6.25727183 | 3.06873794  | -7.02969647 |
| O    | -1.79444814 | -1.55130660 | 3.42006751  | H    | -4.44025266 | 2.87114789  | -5.36226139 |
| Li   | -1.85911899 | -0.33611009 | 1.94191090  | C    | -4.21833769 | -0.62738246 | -0.19464152 |
| O    | -1.87925902 | -0.81197050 | -0.03326498 | C    | -4.46350698 | -1.67585691 | 0.87688134  |
| C    | -2.90486341 | -0.56289784 | -0.72139400 | H    | -5.52685704 | -1.93000209 | 0.92803409  |
| N    | -2.70931423 | -0.11194456 | -2.06502903 | H    | -3.90803194 | -2.60121196 | 0.67953506  |
| C    | -3.76513514 | 0.04726191  | -3.07905135 | H    | -4.15753034 | -1.32250344 | 1.86897360  |
| C    | -2.94570032 | -0.17369835 | -4.35904948 | H    | -5.03691049 | -0.46760471 | -0.89068463 |
| H    | -2.94384054 | -1.22247238 | -4.67619414 | O    | -3.31008218 | 0.90867502  | 1.89309979  |
| H    | -3.25951672 | 0.45806314  | -5.19060110 | C    | -4.01632406 | 1.18343079  | 0.87434073  |
| O    | -1.60311185 | 0.19479621  | -3.99008169 | H    | -3.52627661 | 1.72621527  | 0.03927211  |
| C    | -1.46137012 | 0.08413320  | -2.64121083 | C    | -5.46404146 | 1.68017155  | 1.06058320  |
| O    | -0.37288844 | 0.16482801  | -2.11171479 | H    | -5.99345871 | 1.56635004  | 0.10379658  |
| H    | -4.51663456 | -0.73581759 | -2.95595169 | C    | -6.23356076 | 0.94484216  | 2.16153755  |
| C    | -4.43556028 | 1.44080013  | -3.02299494 | H    | -7.19588670 | 1.43563723  | 2.35024932  |
| H    | -4.81613708 | 1.59827879  | -2.00874900 | H    | -6.43500028 | -0.09584807 | 1.89508873  |
| H    | -3.66329384 | 2.20088884  | -3.19362619 | H    | -5.65595159 | 0.94655855  | 3.09099721  |

|   |             |             |             |
|---|-------------|-------------|-------------|
| C | -5.38557985 | 3.18981256  | 1.37423854  |
| H | -4.83892099 | 3.73728000  | 0.59592176  |
| H | -6.39035140 | 3.62331652  | 1.44536583  |
| H | -4.87218382 | 3.35560577  | 2.32789334  |
| H | 1.95193925  | -0.81427507 | 5.46106397  |
| C | 0.59870788  | 0.71374550  | 6.22347522  |
| H | 0.92763629  | 1.50174041  | 5.53782221  |
| H | -0.48611082 | 0.82190488  | 6.34490373  |
| C | 1.29223214  | 0.84595612  | 7.56124031  |
| C | 2.67732423  | 1.06230577  | 7.62882064  |
| C | 3.32930150  | 1.15780842  | 8.85783607  |
| C | 2.60583717  | 1.04050112  | 10.04711435 |
| C | 1.22766374  | 0.83051591  | 9.99587958  |
| C | 0.57924312  | 0.73376330  | 8.76272608  |
| H | -0.49755645 | 0.58124798  | 8.73115974  |
| H | 0.65386995  | 0.74544055  | 10.91509978 |
| H | 3.11261354  | 1.11788788  | 11.00530616 |
| H | 4.40214610  | 1.33008858  | 8.88771921  |
| H | 3.24729520  | 1.16834829  | 6.70794484  |
| C | 2.01955546  | 0.56045578  | 3.12568451  |
| H | 2.58727104  | 0.44766010  | 4.04157929  |
| C | 2.68451065  | 1.33086518  | 2.01971156  |
| H | 1.99775950  | 1.49270832  | 1.18515516  |
| H | 3.02967620  | 2.31782581  | 2.36300941  |
| H | 3.57451246  | 0.81709443  | 1.62179368  |
| O | 1.36896445  | -1.49209059 | -0.44658905 |
| C | 2.28321218  | -2.04750935 | 0.51880093  |
| C | 1.83296159  | -3.49534361 | 0.68575925  |
| C | 1.46584150  | -3.86687416 | -0.76041972 |
| C | 0.90148041  | -2.54813855 | -1.32166258 |
| H | -0.19134241 | -2.52534530 | -1.30030644 |
| H | 1.23901007  | -2.34069552 | -2.34252843 |
| H | 0.74223109  | -4.68511415 | -0.82520249 |
| H | 2.36342595  | -4.16961835 | -1.31235188 |
| H | 0.94964880  | -3.53634360 | 1.33334252  |
| H | 2.60930906  | -4.13809708 | 1.11296444  |
| H | 3.30861222  | -1.99649373 | 0.12116380  |
| H | 2.21896748  | -1.44400515 | 1.42490369  |
| O | -0.00960766 | 2.14188337  | -0.08315328 |
| C | -0.52313683 | 2.97389098  | 0.98039270  |
| C | -0.79197107 | 4.36314206  | 0.34650290  |
| C | -0.29726781 | 4.21761371  | -1.11270811 |
| C | 0.62918686  | 3.00312217  | -1.02933494 |
| H | 1.62720129  | 3.29152161  | -0.66138946 |
| H | 0.73833890  | 2.44336055  | -1.95955758 |
| H | 0.20881518  | 5.11350826  | -1.48620274 |
| H | -1.13412178 | 3.99729093  | -1.78506069 |
| H | -0.23429761 | 5.14308852  | 0.87538129  |
| H | -1.85112199 | 4.63367741  | 0.39093709  |
| H | -1.41413230 | 2.48114301  | 1.37247400  |
| H | 0.22338107  | 3.03270402  | 1.78122823  |

**Table 21.** Geometric coordinates and thermally corrected MP2 energies for the transition state leading to (*R,R*)-6 from 5 dimer with three THF

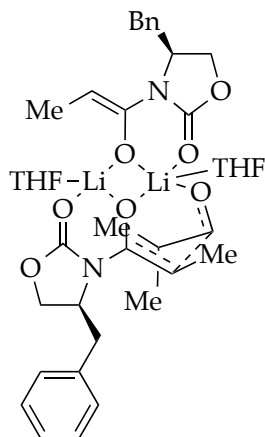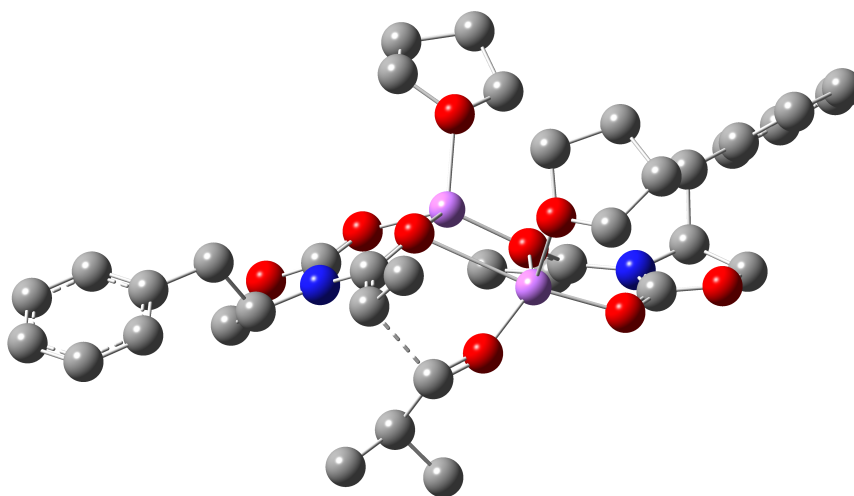

G = -2280.366658 Hartree

G<sub>MP2</sub> = -1426404.058 kcal/mol

ΔG<sub>MP2</sub> = 7.744958821 kcal/mol vs. 5 dimer with three THF

| Atom | X          | Y           | Z           | Atom | X           | Y           | Z           |
|------|------------|-------------|-------------|------|-------------|-------------|-------------|
| Li   | 0.00000000 | 0.00000000  | 0.00000000  | H    | 8.43667046  | -3.24368511 | 1.35842241  |
| O    | 0.00000000 | 0.00000000  | 1.97714830  | H    | 10.17411427 | -4.79184812 | 0.51890714  |
| Li   | 1.85927987 | 0.00000000  | 2.20286854  | H    | 10.08654764 | -5.61202323 | -1.82857703 |
| O    | 2.65471249 | -0.11178775 | 0.47380784  | H    | 8.24574310  | -4.86260844 | -3.32544374 |
| C    | 3.25915389 | -1.04237071 | -0.09954078 | H    | 6.51243686  | -3.31570151 | -2.48489613 |
| N    | 3.86279211 | -2.06591706 | 0.72679062  | C    | 3.26047509  | -1.23357844 | -1.50509419 |
| C    | 4.91870637 | -2.99370802 | 0.28310138  | H    | 3.94810011  | -1.97794276 | -1.89679123 |
| C    | 4.96057550 | -3.94437336 | 1.48688754  | C    | 3.11905198  | 0.01002747  | -2.36264164 |
| H    | 4.29063535 | -4.80147358 | 1.36044017  | H    | 2.25718414  | 0.59978721  | -2.04017187 |
| H    | 5.96350943 | -4.29576316 | 1.73189251  | H    | 4.00926636  | 0.65322142  | -2.30942638 |
| O    | 4.47601257 | -3.14885931 | 2.58684243  | H    | 2.97648264  | -0.26700180 | -3.41380204 |
| C    | 3.73060649 | -2.12673075 | 2.09740284  | O    | 2.39018905  | 1.58349732  | 3.30144917  |
| O    | 3.08001368 | -1.41496570 | 2.84761888  | C    | 1.46045247  | 2.08713770  | 4.29422813  |
| H    | 4.60356811 | -3.53024126 | -0.61249207 | C    | 2.31783430  | 2.62222032  | 5.45019925  |
| C    | 6.25601155 | -2.25947012 | 0.02140952  | C    | 3.62662106  | 1.83100105  | 5.29307601  |
| H    | 6.06095530 | -1.45691118 | -0.69873472 | C    | 3.74469526  | 1.73128804  | 3.77396224  |
| H    | 6.57735965 | -1.78119330 | 0.95494230  | H    | 4.30968675  | 0.86390071  | 3.42673901  |
| C    | 7.33987890 | -3.18057910 | -0.49592957 | H    | 4.18089910  | 2.64337865  | 3.34233581  |
| C    | 7.30712772 | -3.64626694 | -1.81908236 | H    | 3.52776770  | 0.82987382  | 5.72801038  |
| C    | 8.28679160 | -4.51642367 | -2.29611895 | H    | 4.48838115  | 2.32420522  | 5.75314746  |
| C    | 9.32126663 | -4.93634984 | -1.45656103 | H    | 1.83823236  | 2.47573491  | 6.42243215  |
| C    | 9.36921556 | -4.47738684 | -0.14013804 | H    | 2.50699476  | 3.69502027  | 5.32645932  |
| C    | 8.38526834 | -3.60703766 | 0.33407033  | H    | 0.83784313  | 2.85727153  | 3.82802252  |

|   |             |             |             |   |             |             |             |
|---|-------------|-------------|-------------|---|-------------|-------------|-------------|
| H | 0.81510610  | 1.25750677  | 4.60033727  | H | 0.17671999  | -5.22403077 | -0.92158402 |
| C | -1.05448197 | -0.26052103 | 2.69444608  | H | -0.46235338 | -3.61516754 | -0.49331215 |
| N | -2.29220626 | 0.38045697  | 2.23174069  | H | -0.41656024 | -4.13068205 | -2.18582715 |
| C | -3.26307069 | 1.02672944  | 3.11781158  | H | 1.47264227  | -1.90784155 | -2.82751044 |
| C | -4.38467615 | 1.35382325  | 2.11406070  |   |             |             |             |
| H | -5.17538875 | 0.59523829  | 2.12202738  |   |             |             |             |
| H | -4.83141684 | 2.33816305  | 2.26644438  |   |             |             |             |
| O | -3.74742665 | 1.33372723  | 0.82554193  |   |             |             |             |
| C | -2.58140052 | 0.62284411  | 0.92443743  |   |             |             |             |
| O | -1.96224116 | 0.30031276  | -0.07890462 |   |             |             |             |
| H | -3.62663005 | 0.32254939  | 3.87059420  |   |             |             |             |
| C | -2.66461996 | 2.25993581  | 3.83390277  |   |             |             |             |
| H | -1.74279152 | 1.92518573  | 4.32266506  |   |             |             |             |
| H | -2.38488067 | 3.00343186  | 3.07706919  |   |             |             |             |
| C | -3.60714446 | 2.86640094  | 4.84952720  |   |             |             |             |
| C | -4.28769376 | 4.06337840  | 4.58934022  |   |             |             |             |
| C | -5.17916978 | 4.60038945  | 5.52077070  |   |             |             |             |
| C | -5.40525007 | 3.94511476  | 6.73140734  |   |             |             |             |
| C | -4.73116698 | 2.75260803  | 7.00583538  |   |             |             |             |
| C | -3.84082463 | 2.22086110  | 6.07375385  |   |             |             |             |
| H | -3.31216920 | 1.29673529  | 6.29887800  |   |             |             |             |
| H | -4.89570607 | 2.23869906  | 7.94939523  |   |             |             |             |
| H | -6.09761623 | 4.36145201  | 7.45813015  |   |             |             |             |
| H | -5.69356113 | 5.53212552  | 5.30014375  |   |             |             |             |
| H | -4.10940443 | 4.58585766  | 3.65174230  |   |             |             |             |
| C | -1.16285902 | -1.00745711 | 3.82346628  |   |             |             |             |
| C | -0.03132960 | -1.73657963 | 4.48922859  |   |             |             |             |
| H | 0.19494994  | -1.34388524 | 5.49413514  |   |             |             |             |
| H | -0.27110633 | -2.80107268 | 4.62573586  |   |             |             |             |
| H | 0.89043003  | -1.69049902 | 3.90393399  |   |             |             |             |
| H | -2.15104598 | -1.14675007 | 4.25247551  |   |             |             |             |
| O | 0.44297162  | 1.90861415  | -0.79020332 |   |             |             |             |
| C | 1.05471373  | 2.97659106  | -0.06212146 |   |             |             |             |
| C | -0.08474843 | 3.97469786  | 0.21460016  |   |             |             |             |
| C | -1.09975639 | 3.70208089  | -0.93136285 |   |             |             |             |
| C | -0.47097391 | 2.52577700  | -1.70632294 |   |             |             |             |
| H | 0.08736823  | 2.88144766  | -2.58563199 |   |             |             |             |
| H | -1.18713838 | 1.76339075  | -2.01256227 |   |             |             |             |
| H | -1.24542756 | 4.57429455  | -1.57655073 |   |             |             |             |
| H | -2.07573279 | 3.41695591  | -0.52930873 |   |             |             |             |
| H | 0.27418143  | 5.00886175  | 0.22755984  |   |             |             |             |
| H | -0.54001771 | 3.76836882  | 1.18872057  |   |             |             |             |
| H | 1.51298677  | 2.55214642  | 0.83223675  |   |             |             |             |
| H | 1.84118884  | 3.43564673  | -0.68156764 |   |             |             |             |
| O | 0.55925449  | -1.36392956 | -1.09333216 |   |             |             |             |
| C | 1.39548530  | -2.07059396 | -1.73164236 |   |             |             |             |
| C | 1.53101133  | -3.56803653 | -1.36617256 |   |             |             |             |
| H | 2.01366401  | -3.64278796 | -0.38181153 |   |             |             |             |
| C | 2.34528124  | -4.35248929 | -2.40350036 |   |             |             |             |
| H | 3.36354003  | -3.96601526 | -2.52785590 |   |             |             |             |
| H | 2.42214961  | -5.41084818 | -2.12689986 |   |             |             |             |
| H | 1.86015256  | -4.30664190 | -3.38707131 |   |             |             |             |
| C | 0.12120236  | -4.17234786 | -1.22976900 |   |             |             |             |

**Table 22.** Geometric coordinates and thermally corrected MP2 energies for the transition state leading to (*S,S*)-6 from 5 dimer with three THF

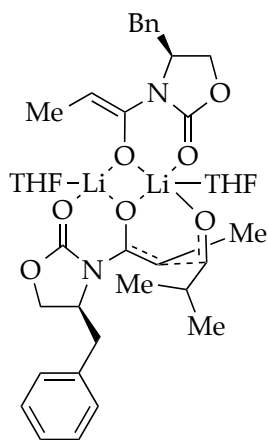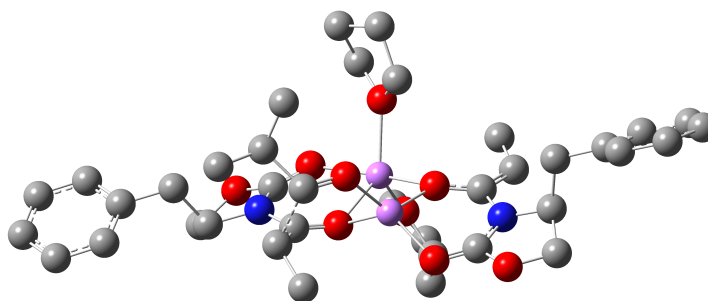

G = -2280.361842 Hartree

G<sub>MP2</sub> = -1426401.658 kcal/mol

ΔG<sub>MP2</sub> = 10.1456954 kcal/mol vs. 5 dimer with three THF

| Atom | X           | Y           | Z           | Atom | X           | Y           | Z           |
|------|-------------|-------------|-------------|------|-------------|-------------|-------------|
| Li   | 0.00000000  | 0.00000000  | 0.00000000  | C    | -4.52626886 | -0.59038891 | -3.54602670 |
| O    | 0.00000000  | 0.00000000  | 1.99903120  | H    | -5.09461871 | -0.31091563 | -2.65472214 |
| C    | 0.82408025  | 0.00000000  | 2.99620810  | H    | -4.02808918 | 0.31976337  | -3.90175952 |
| N    | 0.29703183  | -0.55777416 | 4.25158639  | C    | -5.45737778 | -1.12868172 | -4.61263407 |
| C    | 0.77464784  | -0.15891978 | 5.58244839  | C    | -5.37254172 | -0.68639617 | -5.93959497 |
| C    | 0.08588178  | -1.21920109 | 6.45359535  | C    | -6.22014033 | -1.20022266 | -6.92353780 |
| H    | 0.73109979  | -2.08693739 | 6.63378057  | C    | -7.16853832 | -2.16844289 | -6.59352356 |
| H    | -0.27450418 | -0.83259195 | 7.40847955  | C    | -7.26702787 | -2.61581812 | -5.27389514 |
| O    | -1.04492431 | -1.64482654 | 5.67558510  | C    | -6.41955194 | -2.09922319 | -4.29434972 |
| C    | -0.82071329 | -1.33383285 | 4.36628286  | H    | -6.51348069 | -2.44596178 | -3.26714441 |
| O    | -1.58770601 | -1.74454478 | 3.50195922  | H    | -8.00872909 | -3.36356490 | -5.00588429 |
| Li   | -1.76244592 | -0.64100413 | 1.93538902  | H    | -7.83061856 | -2.56820070 | -7.35670169 |
| O    | -1.67379199 | -1.27347226 | 0.05251977  | H    | -6.14091020 | -0.83953578 | -7.94564233 |
| C    | -2.69858995 | -1.38798783 | -0.66094909 | H    | -4.64405702 | 0.07778314  | -6.20253188 |
| N    | -2.55782181 | -1.10082336 | -2.06342101 | C    | -3.98663630 | -1.69595687 | -0.14689708 |
| C    | -3.43866856 | -1.60867344 | -3.13205834 | C    | -4.07762521 | -2.73060649 | 0.96508816  |
| C    | -2.40499750 | -1.85094570 | -4.24172623 | H    | -5.10556262 | -2.78802757 | 1.34100704  |
| H    | -1.99385485 | -2.86630059 | -4.21507452 | H    | -3.79927142 | -3.73580481 | 0.61839791  |
| H    | -2.78077573 | -1.63444926 | -5.24212393 | H    | -3.43266404 | -2.48860546 | 1.81424598  |
| O    | -1.34586156 | -0.91991908 | -3.94383078 | H    | -4.77722520 | -1.78860006 | -0.88810030 |
| C    | -1.37959996 | -0.62110755 | -2.61637532 | O    | -3.27297006 | 0.39464970  | 1.51808692  |
| O    | -0.47879922 | -0.00638668 | -2.08366135 | C    | -4.35494738 | 0.04113446  | 0.94981907  |
| H    | -3.90124971 | -2.54438806 | -2.81087202 | C    | -5.04167707 | 1.03018286  | -0.01664545 |

|   |             |             |             |   |             |            |            |
|---|-------------|-------------|-------------|---|-------------|------------|------------|
| H | -4.42660743 | 1.10695190  | -0.92383260 | H | -0.12264216 | 4.93331014 | 0.70894167 |
| C | -5.08210202 | 2.42579216  | 0.63350393  | H | -1.86987196 | 4.65432183 | 0.69562749 |
| H | -5.52683891 | 3.16016272  | -0.04969660 | H | -1.59472901 | 2.30118271 | 1.17032134 |
| H | -5.68568358 | 2.41277813  | 1.55010951  | H | -0.03117147 | 2.82789518 | 1.82981514 |
| H | -4.07595636 | 2.75604279  | 0.90258019  |   |             |            |            |
| C | -6.46183258 | 0.58326859  | -0.38727572 |   |             |            |            |
| H | -6.48758019 | -0.41714609 | -0.83320462 |   |             |            |            |
| H | -7.09998724 | 0.55599795  | 0.50532552  |   |             |            |            |
| H | -6.92326119 | 1.27894370  | -1.09805165 |   |             |            |            |
| H | -5.08984968 | -0.52701204 | 1.55457296  |   |             |            |            |
| H | 1.85930061  | -0.26434872 | 5.65166102  |   |             |            |            |
| C | 0.37537655  | 1.29808826  | 5.91752350  |   |             |            |            |
| H | 0.72993603  | 1.92211816  | 5.08992138  |   |             |            |            |
| H | -0.71949573 | 1.36378395  | 5.93249119  |   |             |            |            |
| C | 0.95226075  | 1.77883045  | 7.23015805  |   |             |            |            |
| C | 2.31253343  | 2.11020509  | 7.32881355  |   |             |            |            |
| C | 2.86360844  | 2.52488859  | 8.54077812  |   |             |            |            |
| C | 2.06166443  | 2.61808732  | 9.68088918  |   |             |            |            |
| C | 0.70661587  | 2.29731598  | 9.59673377  |   |             |            |            |
| C | 0.15915162  | 1.88121524  | 8.38104892  |   |             |            |            |
| H | -0.90111916 | 1.64439852  | 8.32101444  |   |             |            |            |
| H | 0.07193607  | 2.37416638  | 10.47581617 |   |             |            |            |
| H | 2.48944729  | 2.94382555  | 10.62528043 |   |             |            |            |
| H | 3.91858333  | 2.78136360  | 8.59449388  |   |             |            |            |
| H | 2.94076072  | 2.05204268  | 6.44221340  |   |             |            |            |
| C | 2.10276336  | 0.46968778  | 3.03125982  |   |             |            |            |
| H | 2.69615124  | 0.32926951  | 3.92816006  |   |             |            |            |
| C | 2.77588666  | 1.15298405  | 1.87358886  |   |             |            |            |
| H | 2.04240358  | 1.51058607  | 1.14589222  |   |             |            |            |
| H | 3.36470089  | 2.01726689  | 2.21316629  |   |             |            |            |
| H | 3.47558266  | 0.49438093  | 1.33302998  |   |             |            |            |
| O | 1.61856704  | -1.15901008 | -0.36214176 |   |             |            |            |
| C | 1.90735762  | -2.25941920 | 0.53230885  |   |             |            |            |
| C | 2.83327849  | -3.19017848 | -0.25413607 |   |             |            |            |
| C | 3.59066971  | -2.20208397 | -1.15503326 |   |             |            |            |
| C | 2.49574381  | -1.18962837 | -1.50276854 |   |             |            |            |
| H | 1.92203653  | -1.49668992 | -2.38612059 |   |             |            |            |
| H | 2.87530764  | -0.17714823 | -1.67269079 |   |             |            |            |
| H | 4.02889056  | -2.66738755 | -2.04351559 |   |             |            |            |
| H | 4.39621806  | -1.71609977 | -0.59180244 |   |             |            |            |
| H | 2.24975357  | -3.89098166 | -0.86380493 |   |             |            |            |
| H | 3.49025656  | -3.77436602 | 0.39763051  |   |             |            |            |
| H | 2.38755228  | -1.85667144 | 1.43122356  |   |             |            |            |
| H | 0.95781384  | -2.71841465 | 0.81933811  |   |             |            |            |
| O | 0.00491127  | 2.08633651  | -0.11291516 |   |             |            |            |
| C | -0.66701746 | 2.83148148  | 0.94006150  |   |             |            |            |
| C | -0.90722279 | 4.24307081  | 0.37667867  |   |             |            |            |
| C | -0.81481853 | 4.03236171  | -1.14347756 |   |             |            |            |
| C | 0.25493382  | 2.94592898  | -1.23416937 |   |             |            |            |
| H | 1.26385581  | 3.37986867  | -1.15125913 |   |             |            |            |
| H | 0.20341027  | 2.33277074  | -2.13552523 |   |             |            |            |
| H | -0.54804238 | 4.94091334  | -1.69304161 |   |             |            |            |
| H | -1.76577142 | 3.65669506  | -1.53964308 |   |             |            |            |

**Table 23.** Geometric coordinates and thermally corrected MP2 energies for the transition state leading to (*R,S*)-**6** from **5** spirocyclic dimer with three THF

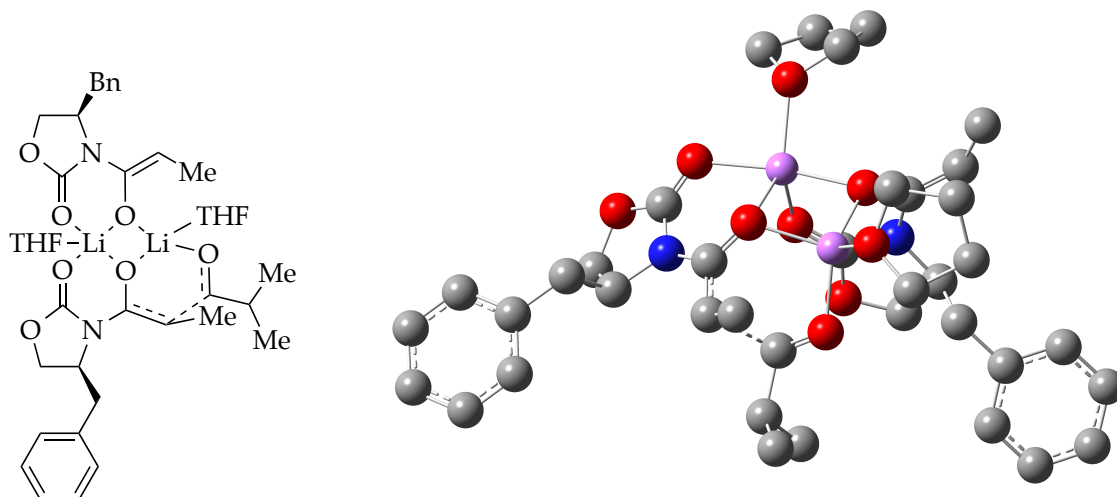

$G = -2280.366593$  Hartree

$G_{\text{MP2}} = -1426408.218$  kcal/mol

$\Delta G_{\text{MP2}} = 4.514509639$  kcal/mol vs. **5** spirocyclic dimer with three THF

| Atom | X          | Y          | Z           | Atom | X           | Y           | Z           |
|------|------------|------------|-------------|------|-------------|-------------|-------------|
| Li   | 0.00000000 | 0.00000000 | 0.00000000  | C    | 7.35430851  | 2.67652496  | -0.86288209 |
| Li   | 0.00000000 | 0.00000000 | 2.75606050  | H    | 7.08805689  | 2.11451341  | -1.75564548 |
| O    | 1.51381912 | 0.00000000 | 1.41788634  | H    | 9.05540048  | 3.61398063  | -1.79276054 |
| C    | 2.43182289 | 0.86010647 | 1.53151668  | H    | 9.69331964  | 4.88767005  | 0.24730028  |
| N    | 2.85667370 | 1.55326002 | 0.35495484  | H    | 8.34497094  | 4.63941846  | 2.32379311  |
| C    | 2.36618127 | 1.31054019 | -0.92057837 | H    | 6.38203562  | 3.13931497  | 2.35846577  |
| O    | 1.53632929 | 0.50485539 | -1.28436097 | C    | 2.96354359  | 1.26504968  | 2.77708131  |
| O    | 2.99573211 | 2.12877927 | -1.80558241 | H    | 3.79095124  | 1.96610838  | 2.76651481  |
| C    | 3.76438388 | 3.10460932 | -1.07952323 | C    | 2.96721316  | 0.25444102  | 3.90396434  |
| H    | 3.16462024 | 4.01559226 | -0.97861188 | H    | 3.08578847  | -0.77053947 | 3.53201841  |
| H    | 4.67126203 | 3.32100188 | -1.64541567 | H    | 3.78692081  | 0.45832742  | 4.60141843  |
| C    | 4.03227832 | 2.43712492 | 0.27465578  | H    | 2.02710789  | 0.28339388  | 4.46826825  |
| H    | 4.01027871 | 3.17840436 | 1.07577536  | O    | -1.36121043 | -0.36752388 | 1.46521900  |
| C    | 5.35898718 | 1.63953077 | 0.31673258  | C    | -2.54292088 | 0.17621473  | 1.41950485  |
| H    | 5.35029186 | 1.02132940 | 1.22092255  | N    | -2.55228015 | 1.63716440  | 1.28819404  |
| H    | 5.37398126 | 0.95397531 | -0.53922174 | C    | -3.41071611 | 2.52632969  | 2.07940084  |
| C    | 6.58219549 | 2.53061649 | 0.29749863  | C    | -2.99313740 | 3.89694057  | 1.50879335  |
| C    | 6.95809437 | 3.25029195 | 1.44185216  | H    | -3.69635885 | 4.25879121  | 0.75056976  |
| C    | 8.06812932 | 4.09419809 | 1.42529165  | H    | -2.86601953 | 4.66293290  | 2.27561430  |
| C    | 8.82638539 | 4.23274804 | 0.26037182  | O    | -1.72140327 | 3.67148559  | 0.87337244  |
| C    | 8.46761033 | 3.51939190 | -0.88353084 | C    | -1.56349972 | 2.33283743  | 0.66451574  |



|   |             |             |             |   |             |             |             |
|---|-------------|-------------|-------------|---|-------------|-------------|-------------|
| O | -0.63523602 | 1.91214458  | -0.01623158 | H | -0.09961671 | -0.09584972 | -2.97653926 |
| H | -4.46464134 | 2.33468412  | 1.85703808  | H | -0.25377756 | -1.81962012 | -3.40771761 |
| C | -3.17899919 | 2.36646475  | 3.59954949  | H | -2.50125130 | 0.20914552  | -3.05081801 |
| H | -3.33915144 | 1.30805839  | 3.83561720  | H | -2.42071621 | -1.14158560 | -4.18808902 |
| H | -2.12948897 | 2.58821689  | 3.82266034  | H | -3.59251610 | -1.13738443 | -1.49218349 |
| C | -4.11069305 | 3.22993626  | 4.42123531  | H | -3.46184126 | -2.55154076 | -2.54921187 |
| C | -3.65302951 | 4.38972216  | 5.06148259  | H | -1.41373620 | -3.24625319 | -1.55024615 |
| C | -4.52402609 | 5.19781710  | 5.79575206  | H | -1.94536217 | -2.25212732 | -0.15948421 |
| C | -5.87306673 | 4.85867302  | 5.90113964  |   |             |             |             |
| C | -6.34348448 | 3.70369329  | 5.27157610  |   |             |             |             |
| C | -5.46967002 | 2.89904319  | 4.54106442  |   |             |             |             |
| H | -5.84259457 | 1.99454183  | 4.06434828  |   |             |             |             |
| H | -7.39131585 | 3.42643182  | 5.35453072  |   |             |             |             |
| H | -6.55232438 | 5.48520733  | 6.47304247  |   |             |             |             |
| H | -4.14579250 | 6.09025728  | 6.28780760  |   |             |             |             |
| H | -2.60062910 | 4.65605295  | 4.99253190  |   |             |             |             |
| C | -3.75969994 | -0.42181010 | 1.51017276  |   |             |             |             |
| C | -3.96987196 | -1.88610986 | 1.76964242  |   |             |             |             |
| H | -4.42732424 | -2.40656061 | 0.91398515  |   |             |             |             |
| H | -3.01962287 | -2.38385006 | 1.98426201  |   |             |             |             |
| H | -4.63866826 | -2.05878283 | 2.62638864  |   |             |             |             |
| H | -4.64727821 | 0.19294341  | 1.38834100  |   |             |             |             |
| O | -0.09770894 | -1.38005935 | 4.19923124  |   |             |             |             |
| C | -0.53992363 | -1.03137109 | 5.52123546  |   |             |             |             |
| C | -1.89496169 | -1.72284213 | 5.65490486  |   |             |             |             |
| C | -1.64892096 | -3.06002873 | 4.92602943  |   |             |             |             |
| C | -0.54886961 | -2.71761382 | 3.89394628  |   |             |             |             |
| H | -0.91148890 | -2.69496675 | 2.86392655  |   |             |             |             |
| H | 0.30260735  | -3.40618237 | 3.95813640  |   |             |             |             |
| H | -2.55382481 | -3.44615103 | 4.44872211  |   |             |             |             |
| H | -1.29260994 | -3.82084112 | 5.62905648  |   |             |             |             |
| H | -2.66288757 | -1.13749480 | 5.13759461  |   |             |             |             |
| H | -2.20532179 | -1.85454755 | 6.69616647  |   |             |             |             |
| H | 0.17833012  | -1.41010362 | 6.26457735  |   |             |             |             |
| H | -0.56449293 | 0.05875054  | 5.57178614  |   |             |             |             |
| O | 0.36469144  | 1.66477280  | 3.69881441  |   |             |             |             |
| C | 1.19669825  | 2.47494059  | 3.18247234  |   |             |             |             |
| H | 1.05387406  | 2.75849319  | 2.12518787  |   |             |             |             |
| C | 1.75931175  | 3.64295922  | 4.00502994  |   |             |             |             |
| C | 0.67384589  | 4.74075946  | 4.04233280  |   |             |             |             |
| H | 1.06429605  | 5.65828940  | 4.49875239  |   |             |             |             |
| H | 0.31390302  | 4.98583725  | 3.03584881  |   |             |             |             |
| H | -0.18375934 | 4.40388610  | 4.63642247  |   |             |             |             |
| H | 2.62063417  | 4.04731538  | 3.45510095  |   |             |             |             |
| C | 2.19332695  | 3.25956047  | 5.42172735  |   |             |             |             |
| H | 3.04920997  | 2.57847045  | 5.41155051  |   |             |             |             |
| H | 2.47662715  | 4.15103491  | 5.99399991  |   |             |             |             |
| H | 1.37382177  | 2.76071619  | 5.94919062  |   |             |             |             |
| O | -0.66254560 | -1.31898227 | -1.43741626 |   |             |             |             |
| C | -1.73749342 | -2.24437178 | -1.22808179 |   |             |             |             |
| C | -2.89999341 | -1.72698029 | -2.09884932 |   |             |             |             |
| C | -2.19611523 | -0.83592905 | -3.16127404 |   |             |             |             |
| C | -0.70092157 | -0.99267300 | -2.83461809 |   |             |             |             |

**Table 24.** Geometric coordinates and thermally corrected MP2 energies for the transition state leading to (*R,S*)-**6** from **5** spirocyclic dimer with three THF

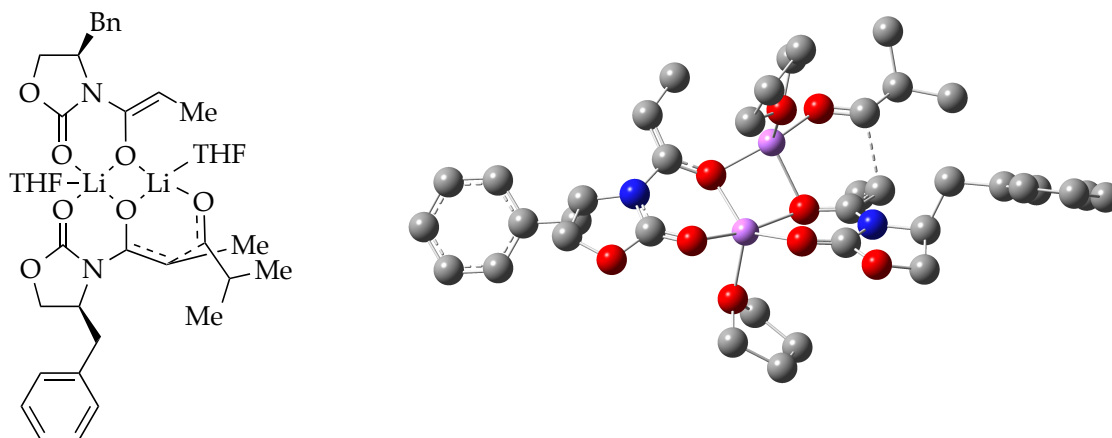

$G = -2280.364103$  Hartree

$G_{\text{MP2}} = -1426403.789$  kcal/mol

$\Delta G_{\text{MP2}} = 8.943400249$  kcal/mol vs. **5** spirocyclic dimer with three THF

| Atom | X          | Y           | Z           | Atom | X           | Y           | Z           |
|------|------------|-------------|-------------|------|-------------|-------------|-------------|
| Li   | 0.00000000 | 0.00000000  | 0.00000000  | H    | 5.91022233  | -1.76059372 | -2.76487234 |
| Li   | 0.00000000 | 0.00000000  | 2.69539740  | H    | 8.30090066  | -2.15686183 | -3.26457510 |
| O    | 1.36298871 | 0.00000000  | 1.39350365  | H    | 10.01888002 | -1.81769433 | -1.49674347 |
| C    | 2.56326864 | 0.49214097  | 1.38485784  | H    | 9.31702689  | -1.08291386 | 0.77472079  |
| N    | 3.08363725 | 0.85149697  | 0.06651852  | H    | 6.92515471  | -0.68799370 | 1.26939056  |
| C    | 2.30494990 | 1.17161837  | -1.00571938 | C    | 3.39681123  | 0.66966629  | 2.44396796  |
| O    | 1.09056991 | 1.31477236  | -1.07042116 | H    | 4.35264248  | 1.16104804  | 2.29175650  |
| O    | 3.08487641 | 1.33705451  | -2.11579259 | C    | 3.05513151  | 0.22851588  | 3.83978731  |
| C    | 4.46703747 | 1.31688369  | -1.71684771 | H    | 3.94383284  | -0.14252315 | 4.36788673  |
| H    | 4.82267759 | 2.35120639  | -1.64432406 | H    | 2.63819370  | 1.03511134  | 4.46567232  |
| H    | 5.04147323 | 0.79130580  | -2.48181663 | H    | 2.31893457  | -0.58447817 | 3.83355830  |
| C    | 4.46888019 | 0.61026698  | -0.35144658 | O    | -1.19068823 | -1.02187451 | 1.37311225  |
| H    | 5.16887088 | 1.10203984  | 0.32831012  | C    | -2.39977044 | -1.08747085 | 1.71231453  |
| C    | 4.79173134 | -0.90126774 | -0.41120440 | N    | -3.30614489 | -0.17406669 | 1.06857062  |
| H    | 4.51768241 | -1.32311431 | 0.56212500  | C    | -4.76816489 | -0.13676488 | 1.23109517  |
| H    | 4.14341599 | -1.36706537 | -1.16332953 | C    | -5.17764430 | 0.47852869  | -0.11578149 |
| C    | 6.24623402 | -1.17984250 | -0.71713248 | H    | -5.40668661 | -0.28375908 | -0.86900679 |
| C    | 7.22644953 | -0.99845050 | 0.27092065  | H    | -6.01373875 | 1.17432567  | -0.03866006 |
| C    | 8.57427074 | -1.22416995 | -0.00628323 | O    | -4.01503228 | 1.20968279  | -0.54553105 |
| C    | 8.96901049 | -1.63847143 | -1.28077195 | C    | -2.91083632 | 0.70110327  | 0.06785707  |
| C    | 8.00546043 | -1.82731445 | -2.27176213 | O    | -1.79383546 | 1.02491007  | -0.28429957 |
| C    | 6.65671834 | -1.59878351 | -1.98994755 | H    | -5.15674675 | -1.15343727 | 1.32735905  |

|   |              |             |             |   |             |             |             |
|---|--------------|-------------|-------------|---|-------------|-------------|-------------|
| C | -5.20742314  | 0.71458958  | 2.44572702  | H | -2.47698462 | -1.05234583 | -2.78293978 |
| H | -4.71161914  | 0.31630960  | 3.33610393  | H | -1.82198591 | -2.17516236 | -3.97776197 |
| H | -4.83285774  | 1.73542222  | 2.30251358  | H | -2.49471088 | -2.72438471 | -1.15421464 |
| C | -6.70864885  | 0.72754564  | 2.64317815  | H | -1.85896378 | -3.89771819 | -2.31109260 |
| C | -7.47473889  | 1.85174928  | 2.30660686  | H | 0.40475568  | -3.47780910 | -1.66932517 |
| C | -8.86185211  | 1.85048867  | 2.46908038  | H | -0.33035427 | -2.92968155 | -0.13196141 |
| C | -9.50609889  | 0.72014405  | 2.97234620  |   |             |             |             |
| C | -8.75457983  | -0.40582185 | 3.31664704  |   |             |             |             |
| C | -7.36957841  | -0.40003912 | 3.15390238  |   |             |             |             |
| H | -6.79226427  | -1.27699932 | 3.43925448  |   |             |             |             |
| H | -9.24690225  | -1.28751111 | 3.71836720  |   |             |             |             |
| H | -10.58492992 | 0.71749551  | 3.10167349  |   |             |             |             |
| H | -9.43628001  | 2.73482866  | 2.20631857  |   |             |             |             |
| H | -6.97848991  | 2.74199217  | 1.92573234  |   |             |             |             |
| C | -2.87448465  | -1.94981162 | 2.72570691  |   |             |             |             |
| C | -2.11121520  | -3.24278304 | 2.93113485  |   |             |             |             |
| H | -2.59212116  | -3.85769731 | 3.69951274  |   |             |             |             |
| H | -2.05939554  | -3.84755748 | 2.01474578  |   |             |             |             |
| H | -1.08385334  | -3.03566917 | 3.24885930  |   |             |             |             |
| H | -3.95076797  | -2.00833896 | 2.85661756  |   |             |             |             |
| O | -0.41806528  | 1.99537841  | 2.94974445  |   |             |             |             |
| C | -0.40392738  | 2.59212415  | 4.25225080  |   |             |             |             |
| C | -0.87717954  | 4.03478210  | 4.02262935  |   |             |             |             |
| C | -0.41128738  | 4.34037895  | 2.57188503  |   |             |             |             |
| C | 0.12731139   | 2.98794634  | 2.05678159  |   |             |             |             |
| H | 1.22302817   | 2.94328705  | 2.10740382  |   |             |             |             |
| H | -0.19127564  | 2.72978598  | 1.04694377  |   |             |             |             |
| H | 0.36648050   | 5.10958587  | 2.54094788  |   |             |             |             |
| H | -1.24586443  | 4.69410530  | 1.95937051  |   |             |             |             |
| H | -0.45641351  | 4.72546609  | 4.75994883  |   |             |             |             |
| H | -1.96787562  | 4.09310635  | 4.09795825  |   |             |             |             |
| H | -1.04785008  | 1.99318197  | 4.89748252  |   |             |             |             |
| H | 0.61985472   | 2.56992538  | 4.65667679  |   |             |             |             |
| O | -0.84655099  | -0.74204283 | 4.21721782  |   |             |             |             |
| C | -2.09540963  | -0.79989588 | 4.40690253  |   |             |             |             |
| H | -2.70897015  | 0.09392207  | 4.17355237  |   |             |             |             |
| C | -2.61271331  | -1.57798654 | 5.62651316  |   |             |             |             |
| H | -2.16785189  | -2.57936883 | 5.59064945  |   |             |             |             |
| C | -4.13879313  | -1.69230760 | 5.70810428  |   |             |             |             |
| H | -4.44139929  | -2.12045877 | 6.67077163  |   |             |             |             |
| H | -4.61490037  | -0.70532122 | 5.63094283  |   |             |             |             |
| H | -4.55126123  | -2.33077881 | 4.92076669  |   |             |             |             |
| C | -2.06024110  | -0.87111724 | 6.88319324  |   |             |             |             |
| H | -2.35575764  | -1.41145068 | 7.79060624  |   |             |             |             |
| H | -0.96915408  | -0.81713781 | 6.84673113  |   |             |             |             |
| H | -2.45162472  | 0.15230847  | 6.96485394  |   |             |             |             |
| O | 0.10489835   | -1.43771252 | -1.45528640 |   |             |             |             |
| C | -0.31855188  | -2.78538065 | -1.21267429 |   |             |             |             |
| C | -1.69985789  | -2.90230881 | -1.88482541 |   |             |             |             |
| C | -1.68350732  | -1.78326025 | -2.96531596 |   |             |             |             |
| C | -0.29844671  | -1.12882255 | -2.79776319 |   |             |             |             |
| H | -0.28881773  | -0.04302087 | -2.89706211 |   |             |             |             |
| H | 0.43104378   | -1.56032611 | -3.49960720 |   |             |             |             |

**Table 25.** Geometric coordinates and thermally corrected MP2 energies for the transition state leading to (*R,R*)-6 from 5 spirocyclic dimer with three THF

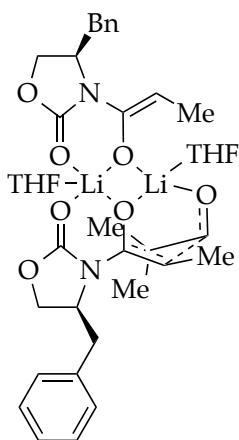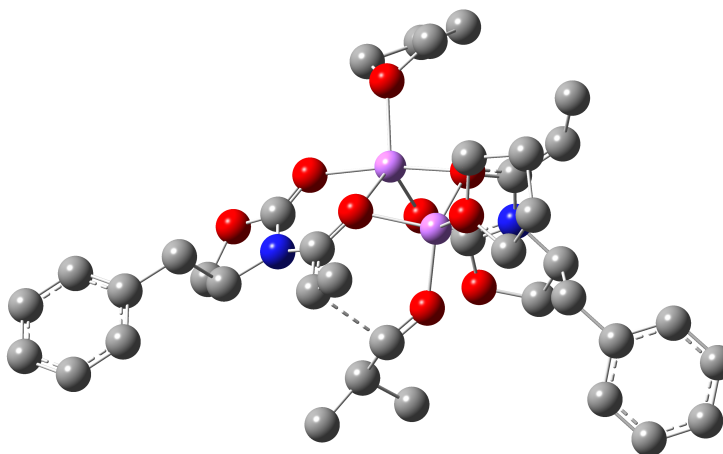

G = -2280.368917 Hartree

G<sub>MP2</sub> = -1426407.73 kcal/mol

ΔG<sub>MP2</sub> = 5.003011202 kcal/mol vs. 5 spirocyclic dimer with three THF

| Atom | X          | Y           | Z           | Atom | X          | Y           | Z           |
|------|------------|-------------|-------------|------|------------|-------------|-------------|
| Li   | 0.00000000 | 0.00000000  | 0.00000000  | C    | 7.19357781 | -2.44653412 | -0.42870884 |
| O    | 0.00000000 | 0.00000000  | 2.09913160  | H    | 7.16101480 | -1.50158045 | -0.96768803 |
| Li   | 1.95860017 | 0.00000000  | 1.88981500  | H    | 9.22763584 | -2.85992046 | -0.99901998 |
| O    | 1.97081528 | 0.52875780  | 0.06579957  | H    | 9.32766472 | -5.01251194 | 0.24561428  |
| C    | 2.80569938 | 0.12044045  | -0.84569565 | H    | 7.33820605 | -5.78658197 | 1.52397507  |
| N    | 2.81504030 | -1.32676581 | -1.07895275 | H    | 5.27149662 | -4.42329137 | 1.55142121  |
| C    | 4.02982925 | -2.14742012 | -1.07580491 | C    | 3.68681134 | 0.84541341  | -1.58222796 |
| C    | 3.42411232 | -3.53186422 | -1.38089816 | C    | 3.91924960 | 2.31933789  | -1.41630695 |
| H    | 3.49381233 | -3.78369132 | -2.44507359 | H    | 3.62787200 | 2.89544082  | -2.30806551 |
| H    | 3.86432190 | -4.33754462 | -0.79107950 | H    | 3.34306290 | 2.71032176  | -0.57232781 |
| O    | 2.03208975 | -3.41973530 | -1.03299830 | H    | 4.97995139 | 2.55201976  | -1.23473515 |
| C    | 1.69876774 | -2.09744890 | -0.96740101 | H    | 4.26256234 | 0.33152769  | -2.34753379 |
| O    | 0.53311672 | -1.74608892 | -0.84309308 | O    | 3.08449519 | 1.33574629  | 2.88857710  |
| H    | 4.69965578 | -1.84337932 | -1.88558609 | C    | 4.40080947 | 1.06149454  | 3.41583691  |
| C    | 4.78894740 | -2.05399819 | 0.26900845  | C    | 5.04769966 | 2.43015003  | 3.65252001  |
| H    | 5.02071987 | -0.99336192 | 0.42546910  | C    | 4.36644675 | 3.30121420  | 2.58442433  |
| H    | 4.11539699 | -2.35810448 | 1.07803047  | C    | 2.94415524 | 2.74043295  | 2.58031402  |
| C    | 6.06072604 | -2.87229711 | 0.28237939  | H    | 2.43490732 | 2.81429515  | 1.61683241  |
| C    | 6.13465589 | -4.08451703 | 0.98256768  | H    | 2.32198874 | 3.20951656  | 3.35452009  |
| C    | 7.30170976 | -4.85167994 | 0.97051971  | H    | 4.83685409 | 3.14906584  | 1.60640205  |
| C    | 8.41811357 | -4.41778755 | 0.25505240  | H    | 4.39511433 | 4.37037761  | 2.81572564  |
| C    | 8.36059293 | -3.20995958 | -0.44449573 | H    | 6.13708268 | 2.39715695  | 3.55630069  |

|   |             |             |             |   |             |            |             |
|---|-------------|-------------|-------------|---|-------------|------------|-------------|
| H | 4.80669921  | 2.79984937  | 4.65628350  | H | -0.41000685 | 0.06623899 | -3.85237146 |
| H | 4.28928940  | 0.46456469  | 4.32579271  | H | -1.40579751 | 1.37488370 | -4.50176967 |
| H | 4.95623044  | 0.47128669  | 2.67665298  | H | 1.31950921  | 1.56069514 | -3.40505745 |
| O | 2.15747087  | -1.73238757 | 2.64259605  | H | 0.35038909  | 2.92542043 | -3.98370869 |
| C | 1.55672441  | -2.33566225 | 3.57460091  | H | -0.47014783 | 3.40864360 | -1.79773011 |
| H | 1.93226260  | -2.20997259 | 4.60790721  | H | 0.98428974  | 2.52341000 | -1.24178092 |
| C | 0.90425890  | -3.70439988 | 3.31729486  |   |             |            |             |
| H | 0.03589950  | -3.55172068 | 2.66298736  |   |             |            |             |
| C | 1.89239009  | -4.60659903 | 2.55252683  |   |             |            |             |
| H | 1.44758023  | -5.59244191 | 2.37097075  |   |             |            |             |
| H | 2.14909062  | -4.16382878 | 1.58764469  |   |             |            |             |
| H | 2.81539686  | -4.75717671 | 3.12843477  |   |             |            |             |
| C | 0.46042042  | -4.37954459 | 4.62121053  |   |             |            |             |
| H | -0.23761795 | -3.76013410 | 5.19473051  |   |             |            |             |
| H | -0.02861660 | -5.33933293 | 4.41898660  |   |             |            |             |
| H | 1.32443042  | -4.58215998 | 5.26742104  |   |             |            |             |
| C | -0.59197574 | -0.74707037 | 2.92695217  |   |             |            |             |
| N | -1.75010946 | -1.46580321 | 2.46914385  |   |             |            |             |
| C | -2.28977004 | -1.34779525 | 1.19547473  |   |             |            |             |
| O | -1.90749979 | -0.68942065 | 0.25250189  |   |             |            |             |
| O | -3.41877767 | -2.10448723 | 1.11457170  |   |             |            |             |
| C | -3.52396294 | -2.91794283 | 2.29527834  |   |             |            |             |
| H | -3.09374067 | -3.90291473 | 2.08185828  |   |             |            |             |
| H | -4.57931357 | -3.02561137 | 2.54885969  |   |             |            |             |
| C | -2.71500985 | -2.15182554 | 3.34755135  |   |             |            |             |
| H | -2.20361196 | -2.84738921 | 4.01458926  |   |             |            |             |
| C | -3.56569594 | -1.14973853 | 4.16689883  |   |             |            |             |
| H | -2.87887879 | -0.48899929 | 4.70673328  |   |             |            |             |
| H | -4.12784086 | -0.52217755 | 3.46475578  |   |             |            |             |
| C | -4.50908152 | -1.83168957 | 5.13404422  |   |             |            |             |
| C | -4.02329130 | -2.40254011 | 6.32024280  |   |             |            |             |
| C | -4.88071145 | -3.05639580 | 7.20446829  |   |             |            |             |
| C | -6.24479182 | -3.14998488 | 6.91850162  |   |             |            |             |
| C | -6.74292166 | -2.58252911 | 5.74553415  |   |             |            |             |
| C | -5.88038762 | -1.92959202 | 4.86232997  |   |             |            |             |
| H | -6.27851764 | -1.47847977 | 3.95588925  |   |             |            |             |
| H | -7.80384622 | -2.64266141 | 5.51761147  |   |             |            |             |
| H | -6.91410169 | -3.65664498 | 7.60844038  |   |             |            |             |
| H | -4.48510950 | -3.48814770 | 8.12008090  |   |             |            |             |
| H | -2.96433558 | -2.32399321 | 6.55860365  |   |             |            |             |
| C | -0.11840061 | -1.02355536 | 4.22476503  |   |             |            |             |
| H | -0.74693467 | -1.64108702 | 4.85770810  |   |             |            |             |
| C | 0.67620478  | 0.02041056  | 4.97963719  |   |             |            |             |
| H | 0.03287776  | 0.82720070  | 5.36219551  |   |             |            |             |
| H | 1.17285155  | -0.43166384 | 5.84763509  |   |             |            |             |
| H | 1.44648872  | 0.48388093  | 4.35858008  |   |             |            |             |
| O | -0.72168074 | 1.41147948  | -1.30749536 |   |             |            |             |
| C | 0.08670708  | 2.46039459  | -1.85571295 |   |             |            |             |
| C | 0.34808199  | 2.05485187  | -3.31992276 |   |             |            |             |
| C | -0.80655895 | 1.06353129  | -3.64017416 |   |             |            |             |
| C | -1.64022239 | 1.04284361  | -2.34681471 |   |             |            |             |
| H | -2.05683902 | 0.07145362  | -2.08296558 |   |             |            |             |
| H | -2.45311269 | 1.78453875  | -2.38577083 |   |             |            |             |

**Table 26.** Geometric coordinates and thermally corrected MP2 energies for the transition state leading to (*R,R*)-6 from 5 spirocyclic dimer with three THF

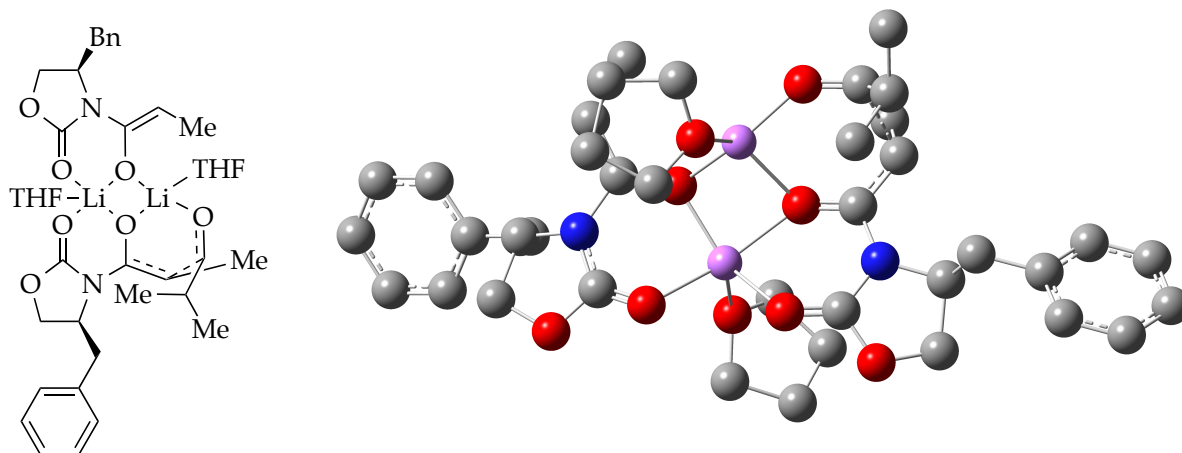

G = -2280.357893 Hartree

G<sub>MP2</sub> = -1426400.739 kcal/mol

ΔG<sub>MP2</sub> = 11.99333579 kcal/mol vs. 5 spirocyclic dimer with three THF

| Atom | X          | Y           | Z           | Atom | X           | Y           | Z           |
|------|------------|-------------|-------------|------|-------------|-------------|-------------|
| Li   | 0.00000000 | 0.00000000  | 0.00000000  | C    | 6.79714943  | -0.33202144 | -2.40917665 |
| Li   | 0.00000000 | 0.00000000  | 2.72130500  | H    | 6.05132255  | -0.39944751 | -3.19861001 |
| O    | 1.35644957 | 0.00000000  | 1.39292478  | H    | 8.45500942  | -0.35812423 | -3.78396351 |
| C    | 2.58159160 | 0.41850213  | 1.39619005  | H    | 10.17493231 | -0.22980780 | -1.99058101 |
| N    | 3.01506950 | 1.09548095  | 0.17225666  | H    | 9.46245690  | -0.14942534 | 0.39248873  |
| C    | 2.17820559 | 1.54015870  | -0.81161490 | H    | 7.05827049  | -0.19211634 | 0.97264677  |
| O    | 0.95427465 | 1.53721240  | -0.86667237 | C    | 3.50010544  | 0.27012715  | 2.39023878  |
| O    | 2.90827619 | 2.04813237  | -1.84946445 | H    | 4.48388780  | 0.71606528  | 2.29013539  |
| C    | 4.28667166 | 2.13026650  | -1.44897829 | C    | 3.22049342  | -0.51192603 | 3.64370724  |
| H    | 4.49662506 | 3.15865584  | -1.13252509 | H    | 4.06911016  | -1.15756126 | 3.91030713  |
| H    | 4.91419236 | 1.88105657  | -2.30632686 | H    | 3.02819423  | 0.12223953  | 4.52461895  |
| C    | 4.40909219 | 1.13300765  | -0.28782697 | H    | 2.34520847  | -1.15861821 | 3.51570055  |
| H    | 5.05999530 | 1.53830515  | 0.49026717  | O    | -1.08908123 | -1.11687166 | 1.33864283  |
| C    | 4.91265737 | -0.26943043 | -0.70578588 | C    | -2.28023603 | -1.45317022 | 1.54783965  |
| H    | 4.72030500 | -0.94136190 | 0.13747811  | N    | -3.28038298 | -0.87798824 | 0.68377296  |
| H    | 4.30379747 | -0.61987272 | -1.54823410 | C    | -4.65629443 | -1.37445532 | 0.51217439  |
| C    | 6.37983479 | -0.28134781 | -1.07223861 | C    | -4.90411260 | -1.00124398 | -0.95938268 |
| C    | 7.36214313 | -0.21574839 | -0.07192192 | H    | -4.67888628 | -1.82762457 | -1.64285665 |
| C    | 8.71780943 | -0.19557595 | -0.39801545 | H    | -5.91537353 | -0.64049128 | -1.14997025 |
| C    | 9.11868360 | -0.24255470 | -1.73544626 | O    | -3.98159540 | 0.07254021  | -1.22348325 |
| C    | 8.15380831 | -0.31327145 | -2.74050401 | C    | -2.95982779 | 0.02210585  | -0.32235538 |

|   |              |             |             |   |             |             |             |
|---|--------------|-------------|-------------|---|-------------|-------------|-------------|
| O | -1.95911996  | 0.69516486  | -0.46372387 | H | -0.08669595 | 0.12682945  | -2.92558981 |
| H | -4.66919292  | -2.45868212 | 0.64915430  | H | 0.89039716  | -1.23551449 | -3.54160525 |
| C | -5.66770694  | -0.71474380 | 1.47787204  | H | -2.10944407 | -1.18208741 | -3.02911774 |
| H | -5.31856207  | -0.87182240 | 2.50264869  | H | -1.23352311 | -2.06572417 | -4.28467261 |
| H | -5.65909073  | 0.36769906  | 1.30349790  | H | -2.01532534 | -3.05738463 | -1.63750778 |
| C | -7.07033002  | -1.26284464 | 1.31592225  | H | -1.03874940 | -3.94479685 | -2.80841885 |
| C | -8.07432814  | -0.51371378 | 0.68786338  | H | 1.00465134  | -3.25506157 | -1.81323106 |
| C | -9.36129650  | -1.03123647 | 0.52486439  | H | 0.02005768  | -2.93424313 | -0.35828271 |
| C | -9.66454473  | -2.31118669 | 0.98914397  |   |             |             |             |
| C | -8.67473716  | -3.06777604 | 1.62088750  |   |             |             |             |
| C | -7.39152508  | -2.54654983 | 1.78290130  |   |             |             |             |
| H | -6.63226674  | -3.13954646 | 2.28913867  |   |             |             |             |
| H | -8.90415474  | -4.06242243 | 1.99401551  |   |             |             |             |
| H | -10.66564647 | -2.71513170 | 0.86578668  |   |             |             |             |
| H | -10.12623594 | -0.43085743 | 0.03960811  |   |             |             |             |
| H | -7.84983212  | 0.49065252  | 0.33483797  |   |             |             |             |
| C | -2.66534074  | -2.32353817 | 2.59610933  |   |             |             |             |
| C | -1.72606863  | -3.48205865 | 2.89315098  |   |             |             |             |
| H | -2.08351609  | -4.05205648 | 3.75839165  |   |             |             |             |
| H | -1.64689243  | -4.18355384 | 2.05006548  |   |             |             |             |
| H | -0.72105987  | -3.11542428 | 3.12060649  |   |             |             |             |
| H | -3.72390718  | -2.56509543 | 2.67184231  |   |             |             |             |
| O | -0.00838657  | 2.01311500  | 3.23010546  |   |             |             |             |
| C | 0.28500981   | 3.11523710  | 2.35545595  |   |             |             |             |
| C | 1.56347111   | 3.77306583  | 2.92052966  |   |             |             |             |
| C | 1.67325466   | 3.20471792  | 4.36190856  |   |             |             |             |
| C | 0.35365327   | 2.44207234  | 4.54814425  |   |             |             |             |
| H | -0.43442723  | 3.10002534  | 4.94773683  |   |             |             |             |
| H | 0.42010715   | 1.55146769  | 5.17592591  |   |             |             |             |
| H | 1.80706830   | 3.98325550  | 5.11962220  |   |             |             |             |
| H | 2.51827332   | 2.51425557  | 4.42818756  |   |             |             |             |
| H | 1.48317167   | 4.86473116  | 2.90826856  |   |             |             |             |
| H | 2.43935546   | 3.49252257  | 2.33048330  |   |             |             |             |
| H | 0.39383439   | 2.71353909  | 1.34760015  |   |             |             |             |
| H | -0.56286998  | 3.81576273  | 2.37320031  |   |             |             |             |
| O | -1.01529063  | -0.68570970 | 4.13775119  |   |             |             |             |
| C | -2.17059551  | -1.17168032 | 4.31919062  |   |             |             |             |
| C | -3.35980934  | -0.24627043 | 4.62369744  |   |             |             |             |
| H | -4.28321767  | -0.81175577 | 4.43364143  |   |             |             |             |
| C | -3.31895904  | 0.07017059  | 6.13437618  |   |             |             |             |
| H | -4.18526116  | 0.67469744  | 6.42887164  |   |             |             |             |
| H | -3.32649760  | -0.84506286 | 6.73861769  |   |             |             |             |
| H | -2.41017103  | 0.62985380  | 6.38269478  |   |             |             |             |
| C | -3.36027537  | 1.04623830  | 3.80370280  |   |             |             |             |
| H | -3.43893984  | 0.84907031  | 2.73072339  |   |             |             |             |
| H | -4.20282633  | 1.68664424  | 4.09231777  |   |             |             |             |
| H | -2.43131511  | 1.60011316  | 3.96037025  |   |             |             |             |
| H | -2.24418982  | -2.11507403 | 4.89330630  |   |             |             |             |
| O | 0.36263381   | -1.30339832 | -1.53677949 |   |             |             |             |
| C | 0.13167473   | -2.71269777 | -1.42068952 |   |             |             |             |
| C | -1.12513076  | -2.99512497 | -2.27147040 |   |             |             |             |
| C | -1.21132656  | -1.77297618 | -3.23045831 |   |             |             |             |
| C | 0.04713925   | -0.95489450 | -2.89218450 |   |             |             |             |

**Table 27.** Geometric coordinates and thermally corrected MP2 energies for the transition state leading to (*R,S*)-**6** from **5** D<sub>2d</sub> tetramer

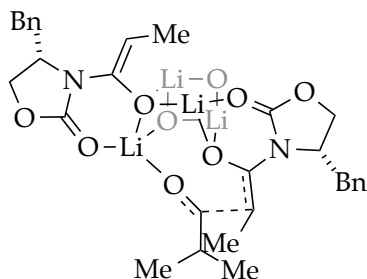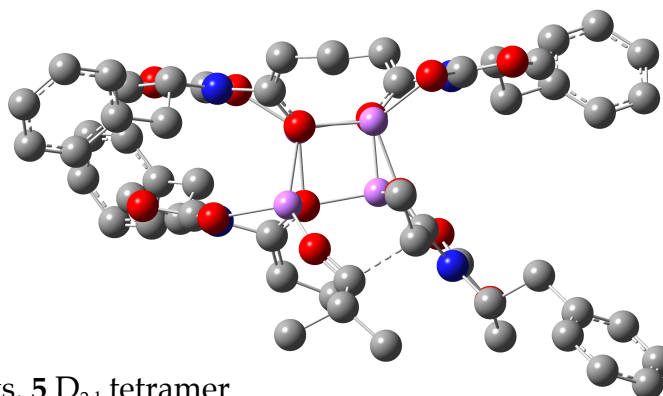

G = -3399.0162 Hartree

G<sub>MP2</sub> = -2126250.456 kcal/mol

ΔG<sub>MP2</sub> = 2.342089648 kcal/mol vs. 5 D<sub>2d</sub> tetramer

| Atom | X           | Y           | Z          | Atom | X           | Y           | Z           |
|------|-------------|-------------|------------|------|-------------|-------------|-------------|
| Li   | 0.00000000  | 0.00000000  | 0.00000000 | O    | -3.91005259 | -1.49524299 | 0.01801640  |
| Li   | 0.00000000  | 0.00000000  | 2.74643830 | C    | -4.44804242 | -0.74449802 | -0.79022094 |
| O    | 1.96466194  | 0.00000000  | 2.98174704 | O    | -5.79235645 | -0.76474698 | -0.97126550 |
| C    | 2.70087849  | 0.59894095  | 2.20599733 | C    | -6.16406942 | 0.29481829  | -1.87345650 |
| O    | 4.00280488  | 0.23666354  | 2.04948724 | H    | -6.61639472 | 1.10213445  | -1.28666721 |
| C    | 4.57478956  | 0.99087859  | 0.95787020 | H    | -6.90204314 | -0.09390506 | -2.57631069 |
| H    | 4.65481990  | 0.32142673  | 0.09700574 | C    | -4.85007627 | 0.74392009  | -2.54322515 |
| H    | 5.56799421  | 1.32708161  | 1.25884417 | N    | -3.86931837 | 0.17861695  | -1.60868045 |
| C    | 3.58740280  | 2.14820906  | 0.69699296 | C    | -2.42797469 | 0.34206244  | -1.71906807 |
| N    | 2.40064933  | 1.65209076  | 1.40258542 | C    | -1.88290216 | 0.45395410  | -2.94955689 |
| C    | 1.10813828  | 2.32623240  | 1.44621903 | H    | -2.52139955 | 0.31492272  | -3.81699121 |
| C    | 1.12929034  | 3.66671868  | 1.61445159 | C    | -0.42485333 | 0.73147934  | -3.19147586 |
| H    | 2.09394733  | 4.13181615  | 1.79967421 | H    | 0.17790200  | -0.18508213 | -3.25986817 |
| C    | -0.06507022 | 4.57526463  | 1.60579325 | H    | -0.28096986 | 1.28503690  | -4.12742456 |
| H    | -0.37663598 | 4.86108274  | 2.62285811 | H    | 0.00596975  | 1.33522621  | -2.38346354 |
| H    | 0.15383623  | 5.51015607  | 1.07281847 | O    | -1.80075674 | 0.40329466  | -0.56243924 |
| H    | -0.93240283 | 4.12028440  | 1.12119057 | C    | -4.73327965 | 2.26918662  | -2.71209670 |
| O    | 0.07545380  | 1.52090435  | 1.28530019 | H    | -4.82079481 | 2.73673899  | -1.72409949 |
| Li   | -1.81381840 | 1.71191339  | 0.84583371 | H    | -3.72604715 | 2.48970736  | -3.08079569 |
| O    | -3.12459318 | 3.11090058  | 1.14891338 | C    | -5.77996430 | 2.82028030  | -3.65808270 |
| C    | -3.72926338 | 3.21605576  | 2.20437251 | C    | -5.67518340 | 2.60801645  | -5.04132249 |
| O    | -4.35527408 | 4.36874211  | 2.53419318 | C    | -6.65031529 | 3.08617337  | -5.91611750 |
| C    | -4.78780831 | 4.29440852  | 3.90890936 | C    | -7.75068458 | 3.79098087  | -5.42261816 |
| H    | -5.73688398 | 4.82302286  | 3.99949214 | C    | -7.86421356 | 4.01597642  | -4.05051679 |
| H    | -4.03115544 | 4.78106805  | 4.53293584 | C    | -6.88641854 | 3.53363723  | -3.17800959 |
| C    | -4.89389768 | 2.79045371  | 4.18771152 | H    | -6.97596232 | 3.72473670  | -2.11073715 |
| N    | -3.91128336 | 2.28268259  | 3.20908917 | H    | -8.71163283 | 4.57136445  | -3.65702817 |
| C    | -3.42844597 | 0.93306173  | 3.16298492 | H    | -8.50929452 | 4.16717169  | -6.10359834 |
| O    | -2.80572707 | 0.57415906  | 2.13368606 | H    | -6.54785460 | 2.91413196  | -6.98438762 |
| Li   | -2.30461121 | -0.89857340 | 0.88539781 | H    | -4.81485465 | 2.07211638  | -5.43694295 |



|   |             |             |             |   |             |             |             |
|---|-------------|-------------|-------------|---|-------------|-------------|-------------|
| H | -4.74480090 | 0.26439357  | -3.52624153 | C | 3.33282247  | 2.41660931  | -0.79716598 |
| O | -0.49004294 | -1.39891543 | 1.32062391  | H | 2.96064832  | 1.49142775  | -1.25121467 |
| C | 0.04149509  | -2.59253666 | 1.13516720  | H | 2.53364801  | 3.16306973  | -0.86897079 |
| N | 1.47475816  | -2.58362442 | 0.87167206  | C | 4.57679577  | 2.90217972  | -1.51142895 |
| C | 2.05521897  | -1.77179605 | -0.04240222 | C | 5.04449598  | 4.21198086  | -1.32450075 |
| O | 1.53112411  | -0.89516539 | -0.73242293 | C | 6.20712278  | 4.65514269  | -1.95456133 |
| O | 3.38361358  | -2.02560169 | -0.14033038 | C | 6.92423955  | 3.79408212  | -2.78844957 |
| C | 3.76459151  | -2.96206225 | 0.89363109  | C | 6.46705088  | 2.49124872  | -2.98884197 |
| H | 4.31606036  | -2.40685517 | 1.65648246  | C | 5.30333135  | 2.05072595  | -2.35488722 |
| H | 4.41165830  | -3.71774522 | 0.44604622  | H | 4.94699257  | 1.03713511  | -2.52447358 |
| C | 2.43887002  | -3.53441526 | 1.44203299  | H | 7.01293005  | 1.81617969  | -3.64289787 |
| H | 2.25800415  | -4.53590891 | 1.02976511  | H | 7.82844036  | 4.13908691  | -3.28284499 |
| C | 2.38355714  | -3.59805758 | 2.97967119  | H | 6.55009332  | 5.67494417  | -1.79971867 |
| C | 3.42342786  | -4.54001004 | 3.54891217  | H | 4.48492010  | 4.89353331  | -0.68692154 |
| C | 4.56665316  | -4.04642630 | 4.19250587  | H | 3.94752967  | 3.07048797  | 1.17319391  |
| C | 5.53706565  | -4.91444541 | 4.69767074  | O | -0.86585242 | 0.07762788  | 4.36626791  |
| C | 5.38029325  | -6.29447323 | 4.56528655  | C | -1.74691847 | 0.60883395  | 5.11625976  |
| C | 4.24417809  | -6.80055839 | 3.92933256  | H | -1.86050626 | 1.71565736  | 5.07806782  |
| C | 3.27620031  | -5.93050969 | 3.42833343  | C | -1.83981912 | 0.09879664  | 6.57401275  |
| H | 2.38740100  | -6.33477943 | 2.94786491  | C | -0.45065206 | 0.29535943  | 7.21388585  |
| H | 4.10848165  | -7.87449930 | 3.82965975  | H | -0.43629815 | -0.10250171 | 8.23603775  |
| H | 6.13328387  | -6.97157355 | 4.95977875  | H | 0.31742337  | -0.21019282 | 6.62419483  |
| H | 6.41315160  | -4.51043848 | 5.19849870  | H | -0.19063085 | 1.36125642  | 7.26585347  |
| H | 4.68932770  | -2.97199577 | 4.30933151  | H | -2.04143744 | -0.97911787 | 6.54075002  |
| H | 1.37588096  | -3.92090801 | 3.26358248  | C | -2.91239805 | 0.79956515  | 7.41737108  |
| H | 2.51992091  | -2.58352940 | 3.36899712  | H | -3.93188523 | 0.52080959  | 7.12835937  |
| C | -0.56723758 | -3.79748005 | 1.18366416  | H | -2.79830545 | 0.54469698  | 8.47731346  |
| C | -2.01215318 | -4.01672813 | 1.53087468  | H | -2.82151235 | 1.89193079  | 7.33702239  |
| H | -2.65374684 | -4.10473015 | 0.64244592  |   |             |             |             |
| H | -2.14040951 | -4.93942403 | 2.11144738  |   |             |             |             |
| H | -2.41048006 | -3.19666063 | 2.13653879  |   |             |             |             |
| H | 0.02252520  | -4.67551283 | 0.93500502  |   |             |             |             |
| C | -3.54064560 | 0.14127398  | 4.33539074  |   |             |             |             |
| H | -4.25973903 | 0.48696573  | 5.06894695  |   |             |             |             |
| C | -3.47459306 | -1.36183753 | 4.15899150  |   |             |             |             |
| H | -4.16826527 | -1.72191001 | 3.38830174  |   |             |             |             |
| H | -2.45968630 | -1.65976617 | 3.87540252  |   |             |             |             |
| H | -3.72702919 | -1.86902581 | 5.09585902  |   |             |             |             |
| C | -6.30792668 | 2.21555904  | 3.93113037  |   |             |             |             |
| H | -6.61709710 | 2.50458199  | 2.91912732  |   |             |             |             |
| H | -6.23741440 | 1.12237811  | 3.94145361  |   |             |             |             |
| C | -7.32720509 | 2.69013889  | 4.94498832  |   |             |             |             |
| C | -8.28362565 | 3.65762659  | 4.60907739  |   |             |             |             |
| C | -9.20824033 | 4.11053396  | 5.55255664  |   |             |             |             |
| C | -9.18878775 | 3.60105613  | 6.85097675  |   |             |             |             |
| C | -8.24286663 | 2.63373815  | 7.19852697  |   |             |             |             |
| C | -7.32230668 | 2.18299765  | 6.25309512  |   |             |             |             |
| H | -6.59797646 | 1.42021938  | 6.53185471  |   |             |             |             |
| H | -8.22537938 | 2.22541498  | 8.20540820  |   |             |             |             |
| H | -9.90840216 | 3.95017936  | 7.58630242  |   |             |             |             |
| H | -9.94520247 | 4.85749257  | 5.26992345  |   |             |             |             |
| H | -8.31350001 | 4.05074368  | 3.59492471  |   |             |             |             |
| H | -4.56776975 | 2.56559500  | 5.20443345  |   |             |             |             |

**Table 28.** Geometric coordinates and thermally corrected MP2 energies for the transition state leading to (*S,R*)-6 from 5  $D_{2d}$  tetramer

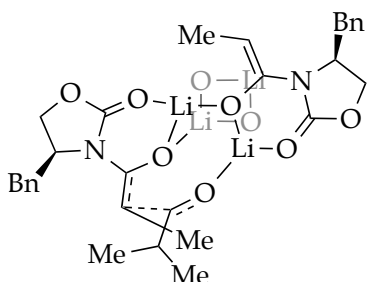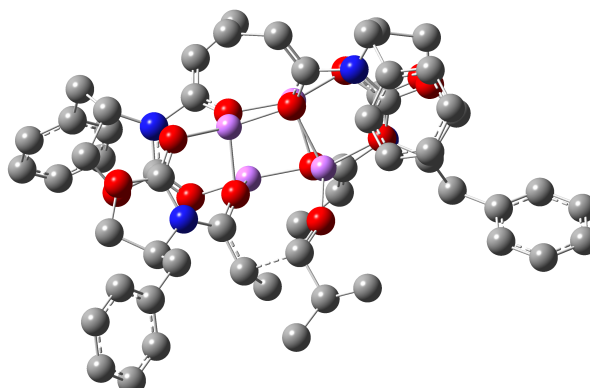

$G = -3399.002753$  Hartree

$G_{MP2} = -2126247.659$  kcal/mol

$\Delta G_{MP2} = 5.138767072$  kcal/mol vs. 5  $D_{2d}$  tetramer

| Atom | X          | Y           | Z           | Atom | X           | Y           | Z           |
|------|------------|-------------|-------------|------|-------------|-------------|-------------|
| Li   | 0.00000000 | 0.00000000  | 0.00000000  | C    | 0.28735600  | 1.05278643  | -3.26392100 |
| O    | 0.00000000 | 0.00000000  | 1.94078310  | O    | 0.55115753  | 0.00866551  | -2.61449572 |
| C    | 0.99820635 | 0.00000000  | 2.64833180  | Li   | -0.07021416 | -1.86447698 | -2.43333278 |
| O    | 0.87078559 | 0.09646201  | 3.99798408  | O    | -0.02615338 | -2.43790495 | -4.29349832 |
| C    | 2.15155842 | -0.12353632 | 4.61133496  | C    | 1.09738687  | -2.54184713 | -4.77775908 |
| H    | 2.18303701 | -1.15367197 | 4.98117537  | O    | 1.40170176  | -1.98921741 | -5.97913800 |
| H    | 2.24958425 | 0.57549087  | 5.44353866  | C    | 2.81929959  | -2.11852570 | -6.21571751 |
| C    | 3.17102919 | 0.11745077  | 3.48561183  | H    | 3.28098710  | -1.13559663 | -6.07907606 |
| H    | 3.94133010 | -0.65866411 | 3.49992547  | H    | 2.95275513  | -2.45140251 | -7.24649357 |
| N    | 2.32093658 | -0.07633151 | 2.30424952  | C    | 3.32172544  | -3.14655874 | -5.17647303 |
| C    | 2.84571784 | -0.40511294 | 0.99341546  | H    | 4.19820802  | -2.76581388 | -4.64242929 |
| C    | 4.18793730 | -0.52346093 | 0.83098999  | N    | 2.18141658  | -3.17408198 | -4.25122387 |
| H    | 4.85928321 | -0.34638329 | 1.66033528  | C    | 2.25790972  | -3.49387944 | -2.83266925 |
| C    | 4.81687465 | -0.90816248 | -0.48322988 | C    | 2.82126233  | -4.65770915 | -2.44418583 |
| H    | 4.85109438 | -0.08066603 | -1.20801311 | H    | 3.09549123  | -5.38368968 | -3.20010000 |
| H    | 5.85155740 | -1.23470600 | -0.33018065 | C    | 3.05191838  | -5.02818814 | -1.00463728 |
| H    | 4.29265543 | -1.74315034 | -0.96844982 | H    | 2.18153568  | -5.52394776 | -0.55112624 |
| O    | 1.94719295 | -0.59674139 | 0.04971762  | H    | 3.90018871  | -5.71649828 | -0.90985041 |
| Li   | 2.24996992 | -0.65637470 | -1.86248177 | H    | 3.27293034  | -4.15020777 | -0.38620407 |
| O    | 3.18269751 | 0.33962967  | -3.25137189 | O    | 1.77987417  | -2.54822014 | -2.04662474 |
| C    | 2.65355009 | 1.14162706  | -4.00427032 | Li   | 1.22242357  | -2.43308944 | -0.20462152 |
| O    | 3.33406409 | 1.65352482  | -5.05725858 | O    | 0.83418019  | -3.46112032 | 1.37414649  |
| C    | 2.42228603 | 2.39830416  | -5.89422270 | C    | -0.19613245 | -3.10807803 | 1.94983074  |
| H    | 2.10825986 | 1.75092032  | -6.71943716 | O    | -0.22197167 | -2.92348005 | 3.28883878  |
| H    | 2.95166907 | 3.26677090  | -6.28641427 | C    | -1.54718165 | -2.50498217 | 3.68385972  |
| C    | 1.25987245 | 2.75817352  | -4.95834515 | H    | -1.44256141 | -1.64787208 | 4.34861272  |
| H    | 0.30503626 | 2.67783200  | -5.48109847 | H    | -2.01808845 | -3.33694148 | 4.21925746  |
| N    | 1.37725048 | 1.67192069  | -3.96558548 | C    | -2.28343141 | -2.16907356 | 2.37000910  |

|   |             |             |             |   |             |            |             |
|---|-------------|-------------|-------------|---|-------------|------------|-------------|
| H | -2.24075465 | -1.09044886 | 2.18266568  | H | 3.36302963  | 5.77092902 | -5.34469606 |
| N | -1.40851882 | -2.85027298 | 1.39477675  | H | 3.13141499  | 7.57537519 | -7.02100624 |
| C | -1.53113296 | -2.68981189 | -0.05030961 | H | 0.89241165  | 8.13801841 | -7.94817864 |
| C | -2.50409687 | -3.39180016 | -0.67036746 | H | -1.11067837 | 6.88052295 | -7.17594109 |
| C | -2.81408020 | -3.28930255 | -2.13813250 | H | -0.87772425 | 5.07992870 | -5.50082191 |
| H | -2.22366995 | -3.98971767 | -2.74779427 | C | 3.86764880  | 1.50413412 | 3.53483853  |
| H | -3.86997656 | -3.51228571 | -2.33324547 | H | 4.56580320  | 1.47935105 | 4.38176260  |
| H | -2.62042474 | -2.28204137 | -2.52656357 | H | 4.47314340  | 1.60176925 | 2.62816882  |
| H | -3.07279125 | -4.09953359 | -0.07663718 | C | 2.94549504  | 2.69623980 | 3.67186025  |
| O | -0.66050501 | -1.86117119 | -0.60297727 | C | 2.78868365  | 3.34257126 | 4.90608660  |
| C | -3.74611686 | -2.63841947 | 2.34805801  | C | 1.92796004  | 4.43288285 | 5.04369493  |
| H | -4.14038237 | -2.46418924 | 1.34110626  | C | 1.20776012  | 4.89620195 | 3.94243637  |
| H | -3.77656105 | -3.72105925 | 2.52273777  | C | 1.36223986  | 4.26900674 | 2.70440680  |
| C | -4.59250061 | -1.91562605 | 3.37680777  | C | 2.22751639  | 3.18322616 | 2.56870904  |
| C | -5.03673045 | -2.56590345 | 4.53550578  | H | 2.34731413  | 2.71009154 | 1.59780028  |
| C | -5.80089190 | -1.89155645 | 5.49040563  | H | 0.80830351  | 4.62391105 | 1.83971540  |
| C | -6.13290880 | -0.55023685 | 5.30023178  | H | 0.53495249  | 5.74334194 | 4.04597452  |
| C | -5.69904982 | 0.10992550  | 4.14810423  | H | 1.82350531  | 4.92006329 | 6.00978193  |
| C | -4.93812049 | -0.56755631 | 3.19608425  | H | 3.35624885  | 2.99475937 | 5.76732142  |
| H | -4.61216243 | -0.04672567 | 2.29827073  | O | -0.69707615 | 1.62601802 | -0.55841550 |
| H | -5.95662423 | 1.15371491  | 3.98841147  | C | -0.85388587 | 2.56047566 | -1.40033797 |
| H | -6.72839609 | -0.02325202 | 6.04099479  | H | 0.02363542  | 3.20042605 | -1.63762146 |
| H | -6.13867667 | -2.41693914 | 6.38005016  | C | -2.15144357 | 3.39173267 | -1.30561792 |
| H | -4.79041920 | -3.61479456 | 4.68683841  | C | -2.13396025 | 4.09433984 | 0.06799376  |
| C | 3.70030523  | -4.51198731 | -5.80493869 | H | -3.06849815 | 4.64468621 | 0.23204479  |
| H | 4.57258073  | -4.32626797 | -6.44581974 | H | -2.00593415 | 3.36565077 | 0.87216266  |
| H | 4.04892030  | -5.16814183 | -5.00133730 | H | -1.30916839 | 4.81821189 | 0.12759375  |
| C | 2.61218220  | -5.18614598 | -6.61364485 | H | -2.99080662 | 2.68614810 | -1.30403180 |
| C | 2.66751316  | -5.19550796 | -8.01459116 | C | -2.34540123 | 4.42193609 | -2.42430329 |
| C | 1.66513022  | -5.80442152 | -8.77183528 | H | -2.56724019 | 3.95740087 | -3.39065394 |
| C | 0.58626342  | -6.41809526 | -8.13546853 | H | -3.17921040 | 5.09349075 | -2.18837041 |
| C | 0.52161755  | -6.42352643 | -6.74051342 | H | -1.45227707 | 5.05046262 | -2.54378509 |
| C | 1.52574554  | -5.81641936 | -5.98600968 |   |             |            |             |
| H | 1.46606111  | -5.83387645 | -4.90144696 |   |             |            |             |
| H | -0.31175891 | -6.90451952 | -6.23549350 |   |             |            |             |
| H | -0.19603091 | -6.89369064 | -8.72090629 |   |             |            |             |
| H | 1.73116034  | -5.80225354 | -9.85676945 |   |             |            |             |
| H | 3.51334568  | -4.73190542 | -8.51903843 |   |             |            |             |
| C | -0.98225090 | 1.67666331  | -3.26148935 |   |             |            |             |
| H | -1.11058902 | 2.49333733  | -3.96471572 |   |             |            |             |
| C | -2.18576358 | 0.76630663  | -3.10424746 |   |             |            |             |
| H | -2.20807491 | -0.02116717 | -3.86931470 |   |             |            |             |
| H | -2.17785533 | 0.28576142  | -2.12034060 |   |             |            |             |
| H | -3.11410698 | 1.33931596  | -3.19580599 |   |             |            |             |
| C | 1.40507564  | 4.15539450  | -4.31323619 |   |             |            |             |
| H | 0.64931822  | 4.24673369  | -3.52650528 |   |             |            |             |
| H | 2.38315221  | 4.20704369  | -3.81933028 |   |             |            |             |
| C | 1.26383013  | 5.28141866  | -5.31614401 |   |             |            |             |
| C | 0.00634301  | 5.61456847  | -5.84192669 |   |             |            |             |
| C | -0.12754177 | 6.63406209  | -6.78401379 |   |             |            |             |
| C | 0.99652647  | 7.34152645  | -7.21656913 |   |             |            |             |
| C | 2.25205963  | 7.02479068  | -6.69766846 |   |             |            |             |
| C | 2.38235039  | 6.00254954  | -5.75518087 |   |             |            |             |

**Table 29.** Geometric coordinates and thermally corrected MP2 energies for the transition state leading to (*R,R*)-6 from 5  $D_{2d}$  tetramer

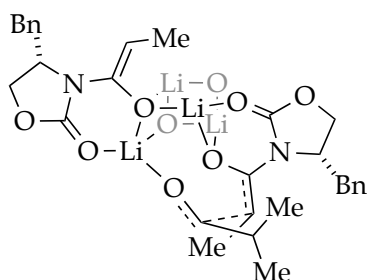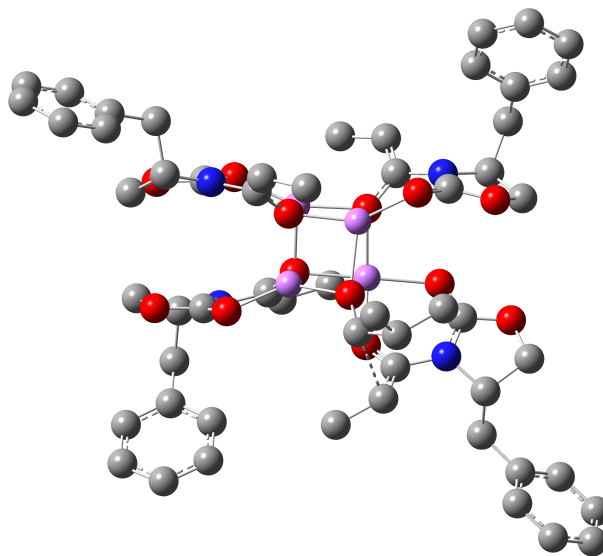

$G = -3398.996634$  Hartree

$G_{MP2} = -2126241.392$  kcal/mol

$\Delta G_{MP2} = 11.40634332$  kcal/mol vs. 5  $D_{2d}$  tetramer

| Atom | X           | Y           | Z           | Atom | X            | Y           | Z           |
|------|-------------|-------------|-------------|------|--------------|-------------|-------------|
| Li   | 0.00000000  | 0.00000000  | 0.00000000  | C    | -3.68246105  | -0.93932651 | 2.24292417  |
| Li   | 0.00000000  | 0.00000000  | 2.67081310  | C    | -3.48483833  | -2.20828707 | 2.78870539  |
| O    | 0.68594493  | 0.00000000  | 4.43212981  | H    | -4.05830519  | -3.03801819 | 2.38465025  |
| C    | 0.69055304  | 1.03317225  | 5.09641099  | C    | -3.00687680  | -2.35494736 | 4.21202671  |
| O    | 1.63306325  | 1.21449818  | 6.05998950  | H    | -2.33498424  | -1.53510270 | 4.48353787  |
| C    | 1.52632050  | 2.55940828  | 6.56993717  | H    | -3.84055334  | -2.34931132 | 4.93210900  |
| H    | 2.29774862  | 3.16918779  | 6.08963325  | H    | -2.46940428  | -3.30070043 | 4.36407956  |
| H    | 1.69115943  | 2.52021860  | 7.64781496  | O    | -3.11011334  | 0.11424819  | 2.60911318  |
| C    | 0.10873702  | 3.00829357  | 6.18018320  | C    | -6.82599932  | -1.41298991 | 1.97556863  |
| H    | 0.10555489  | 4.03934937  | 5.81533159  | H    | -6.34377806  | -1.58426733 | 2.94449925  |
| N    | -0.14392644 | 2.11102326  | 5.04431094  | H    | -7.11743098  | -0.35597370 | 1.94442055  |
| C    | -1.04476264 | 2.41787881  | 3.94502361  | C    | -8.04259040  | -2.30053853 | 1.82800715  |
| C    | -2.00112045 | 3.36015760  | 4.12428130  | C    | -7.97696621  | -3.65998707 | 2.16938681  |
| H    | -2.13864592 | 3.81614097  | 5.09563973  | C    | -9.08466531  | -4.49233543 | 2.01250862  |
| C    | -2.92871124 | 3.80291310  | 3.02504389  | C    | -10.28296587 | -3.97828783 | 1.51124053  |
| H    | -3.83449069 | 3.18086762  | 2.95297025  | C    | -10.36421428 | -2.62759031 | 1.17216146  |
| H    | -3.26491616 | 4.83398482  | 3.18772801  | C    | -9.25195902  | -1.79774666 | 1.32974453  |
| H    | -2.44031584 | 3.78418245  | 2.04180647  | H    | -9.32797034  | -0.74226367 | 1.07659667  |
| O    | -0.79895529 | 1.77411045  | 2.82891478  | H    | -11.29429538 | -2.21574300 | 0.78942680  |
| Li   | -2.24693460 | 1.39552908  | 1.47642674  | H    | -11.14768164 | -4.62534144 | 1.39203287  |
| O    | -3.82454110 | 1.20752922  | 0.19764040  | H    | -9.01465711  | -5.54149408 | 2.28745856  |
| C    | -4.57569308 | 0.24479376  | 0.24248844  | H    | -7.05165503  | -4.06663149 | 2.57286850  |
| O    | -5.60428516 | 0.12774662  | -0.64839926 | O    | -0.85236286  | 1.78343918  | 0.06890000  |
| C    | -6.18797412 | -1.18470372 | -0.52097817 | C    | -0.99516654  | 2.45171181  | -1.06014448 |
| H    | -5.78216118 | -1.82159890 | -1.31410484 | N    | -1.60151522  | 1.69585561  | -2.14276326 |
| H    | -7.26846396 | -1.09505966 | -0.64170787 | C    | -1.36191299  | 0.36819001  | -2.30646871 |
| C    | -5.76511358 | -1.66213657 | 0.87709016  | O    | -0.43963901  | -0.29960612 | -1.83696607 |
| H    | -5.50443777 | -2.72259633 | 0.85055843  | O    | -2.30182493  | -0.20052082 | -3.09351954 |
| N    | -4.56240800 | -0.84008878 | 1.07968695  | C    | -3.34664031  | 0.76050545  | -3.35812331 |

|    |             |             |             |   |             |             |             |
|----|-------------|-------------|-------------|---|-------------|-------------|-------------|
| H  | -4.22795859 | 0.47698201  | -2.77756195 | H | 10.65324221 | 0.05302618  | 4.14360933  |
| H  | -3.56891787 | 0.71577543  | -4.42578930 | H | 9.89886440  | 2.42432370  | 4.13079035  |
| C  | -2.77646092 | 2.12689594  | -2.91498662 | H | 7.72289734  | 3.02902329  | 3.12049375  |
| H  | -3.46698156 | 2.63262243  | -2.23448985 | C | -0.91165812 | 2.89287623  | 7.34704962  |
| C  | -2.48458066 | 3.06903185  | -4.11108678 | H | -0.57786580 | 3.59817762  | 8.11973349  |
| H  | -3.45754966 | 3.29007298  | -4.57009970 | H | -1.88310784 | 3.25403512  | 6.99770598  |
| H  | -2.11520771 | 4.02061690  | -3.71717586 | C | -1.07200250 | 1.51239083  | 7.94588940  |
| C  | -1.54271138 | 2.52355262  | -5.16372273 | C | -0.44718041 | 1.17033384  | 9.15287990  |
| C  | -2.03361796 | 2.08766808  | -6.40248373 | C | -0.59087426 | -0.10600332 | 9.69941792  |
| C  | -1.17719440 | 1.57392451  | -7.37800940 | C | -1.36820415 | -1.06192347 | 9.04498300  |
| C  | 0.19246255  | 1.48930510  | -7.12871812 | C | -2.00533706 | -0.73084567 | 7.84707378  |
| C  | 0.69729496  | 1.92683783  | -5.90235771 | C | -1.86162770 | 0.54597092  | 7.30352205  |
| C  | -0.16052506 | 2.44153870  | -4.92997702 | H | -2.36855027 | 0.79954541  | 6.37583404  |
| H  | 0.24638035  | 2.78409312  | -3.98265836 | H | -2.62015385 | -1.46543058 | 7.33405578  |
| H  | 1.76370851  | 1.87039858  | -5.70073788 | H | -1.48285123 | -2.05615260 | 9.46859561  |
| H  | 0.86291715  | 1.09032205  | -7.88523547 | H | -0.09947353 | -0.35028396 | 10.63769676 |
| H  | -1.58096078 | 1.24463447  | -8.33198769 | H | 0.14823922  | 1.91506701  | 9.67786302  |
| H  | -3.09923874 | 2.16310714  | -6.61093372 | O | -0.86271547 | -1.27667707 | 1.39793096  |
| C  | -0.65861320 | 3.74474886  | -1.26918352 | C | -1.30008154 | -2.40932432 | 1.74133680  |
| H  | -0.74043420 | 4.15460078  | -2.26770909 | C | -1.58351177 | -3.53247140 | 0.75314164  |
| C  | -0.12973270 | 4.65274919  | -0.19165977 | H | -2.27104033 | -4.22291862 | 1.25667272  |
| H  | 0.96591641  | 4.61215289  | -0.09507190 | C | -0.26328643 | -4.30331669 | 0.51610304  |
| H  | -0.38901761 | 5.69783985  | -0.39900363 | H | -0.45734556 | -5.19511909 | -0.09095959 |
| H  | -0.54883319 | 4.41109035  | 0.79324251  | H | 0.46527090  | -3.68422581 | -0.01616429 |
| Li | 0.46826932  | 2.22682598  | 1.44466884  | H | 0.19109850  | -4.63129468 | 1.45870155  |
| O  | 1.99467233  | 3.09009381  | 2.23133929  | C | -2.19939176 | -3.07167132 | -0.56973632 |
| C  | 2.91559179  | 2.40300728  | 2.66139224  | H | -2.39712042 | -3.93653977 | -1.21383438 |
| O  | 3.66563101  | 2.83345964  | 3.71658862  | H | -3.14515668 | -2.54701082 | -0.40234776 |
| C  | 4.54232101  | 1.75268460  | 4.12047883  | H | -1.53262430 | -2.39437131 | -1.11031646 |
| H  | 4.05627317  | 1.20321004  | 4.93227849  | H | -1.06515255 | -2.75578068 | 2.75704468  |
| H  | 5.48137290  | 2.18849123  | 4.46375911  |   |             |             |             |
| C  | 4.68025527  | 0.91204613  | 2.84691822  |   |             |             |             |
| H  | 4.75092800  | -0.15570843 | 3.06601660  |   |             |             |             |
| N  | 3.37832424  | 1.19622864  | 2.22675441  |   |             |             |             |
| C  | 2.67403316  | 0.30991872  | 1.31770044  |   |             |             |             |
| C  | 3.37787260  | -0.63745602 | 0.65526712  |   |             |             |             |
| C  | 2.74531825  | -1.65452856 | -0.25128988 |   |             |             |             |
| H  | 1.70038652  | -1.83547944 | 0.02030865  |   |             |             |             |
| H  | 2.75753890  | -1.35094432 | -1.30917690 |   |             |             |             |
| H  | 3.26678246  | -2.61836349 | -0.19021626 |   |             |             |             |
| H  | 4.45667268  | -0.66527190 | 0.74900383  |   |             |             |             |
| O  | 1.37368210  | 0.50110670  | 1.27147476  |   |             |             |             |
| C  | 5.87113460  | 1.37175571  | 1.96541406  |   |             |             |             |
| H  | 5.76299113  | 0.92760876  | 0.97134265  |   |             |             |             |
| H  | 5.79606668  | 2.45799882  | 1.83233362  |   |             |             |             |
| C  | 7.21543697  | 1.01113223  | 2.56080399  |   |             |             |             |
| C  | 8.04151747  | 1.98875262  | 3.13134041  |   |             |             |             |
| C  | 9.27186111  | 1.64902599  | 3.69825235  |   |             |             |             |
| C  | 9.69580877  | 0.32013240  | 3.70455746  |   |             |             |             |
| C  | 8.88403401  | -0.66482520 | 3.13683427  |   |             |             |             |
| C  | 7.65723276  | -0.32090023 | 2.57030888  |   |             |             |             |
| H  | 7.03768220  | -1.09488128 | 2.12173308  |   |             |             |             |
| H  | 9.20917685  | -1.70190728 | 3.13068973  |   |             |             |             |

**Table 30.** Geometric coordinates and thermally corrected MP2 energies for the transition state leading to (*S,S*)-6 from 5  $D_{2d}$  tetramer

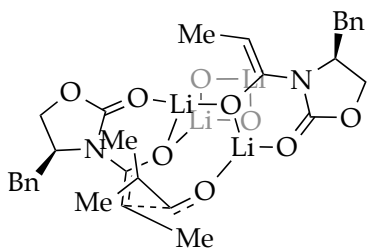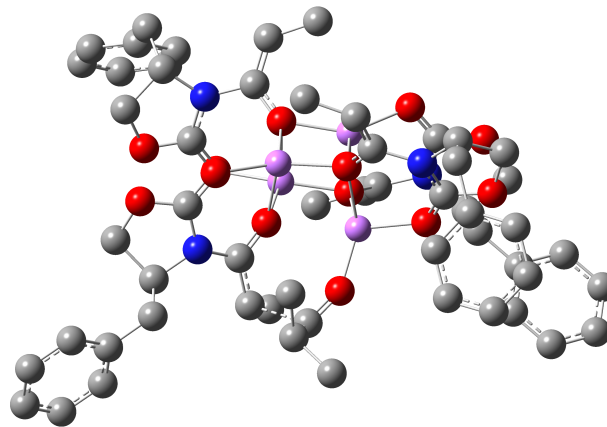

$G = -3398.99907$  Hartree

$G_{MP2} = -2126248.026$  kcal/mol

$\Delta G_{MP2} = 4.772167067$  kcal/mol vs. 5  $D_{2d}$  tetramer

| Atom | X           | Y           | Z           | Atom | X           | Y           | Z           |
|------|-------------|-------------|-------------|------|-------------|-------------|-------------|
| Li   | 0.00000000  | 0.00000000  | 0.00000000  | H    | -1.36327381 | 2.22699369  | -3.96601355 |
| O    | 0.00000000  | 0.00000000  | 1.95469910  | C    | -2.29755834 | 0.47278482  | -3.02041830 |
| C    | 0.98221044  | 0.00000000  | 2.68334283  | H    | -2.15630591 | -0.08858569 | -2.09286173 |
| O    | 0.82811889  | -0.04776095 | 4.03345096  | H    | -3.24806024 | 1.01273622  | -2.94531709 |
| C    | 2.10902824  | -0.28100146 | 4.64279552  | H    | -2.38235399 | -0.23931844 | -3.85182362 |
| H    | 2.19120406  | -1.34931275 | 4.86773685  | O    | 0.53718292  | -0.02097289 | -2.51384640 |
| H    | 2.15315883  | 0.30208803  | 5.56390430  | Li   | 0.20347696  | -1.97146649 | -2.36623312 |
| C    | 3.12776029  | 0.16700089  | 3.58251405  | O    | 0.38134071  | -2.47682548 | -4.23053096 |
| H    | 3.95646232  | -0.54423680 | 3.51990518  | C    | 1.51141812  | -2.59299733 | -4.69490621 |
| N    | 2.31392866  | 0.04896051  | 2.36543203  | O    | 1.79528843  | -2.15497523 | -5.95120657 |
| C    | 2.87866997  | -0.12764564 | 1.04347842  | C    | 3.21428631  | -2.28669120 | -6.18721111 |
| C    | 4.22215618  | -0.03439916 | 0.87753561  | H    | 3.66618938  | -1.29334018 | -6.11091091 |
| H    | 4.86409772  | 0.20539640  | 1.71408390  | H    | 3.34503422  | -2.68126259 | -7.19640437 |
| C    | 4.88549723  | -0.24848423 | -0.45844497 | C    | 3.71698423  | -3.24542908 | -5.08887446 |
| H    | 4.71803923  | 0.58042280  | -1.16323619 | H    | 4.63695224  | -2.87369048 | -4.62783955 |
| H    | 5.97032631  | -0.34145565 | -0.33765038 | N    | 2.62317042  | -3.12729817 | -4.11609107 |
| H    | 4.54679033  | -1.16973361 | -0.95427739 | C    | 2.75283686  | -3.30266035 | -2.67794822 |
| O    | 2.01733922  | -0.41400399 | 0.08937010  | C    | 3.55428827  | -4.27627755 | -2.19351480 |
| Li   | 2.34121496  | -0.45852827 | -1.81313503 | H    | 3.99846429  | -4.98620843 | -2.87984460 |
| O    | 3.09592809  | 0.50032357  | -3.35305094 | C    | 3.84339684  | -4.44996020 | -0.72656356 |
| C    | 2.42604226  | 0.98279462  | -4.25183050 | H    | 3.06585601  | -5.02599368 | -0.20480663 |
| O    | 2.95050542  | 1.19705283  | -5.48116020 | H    | 4.79178491  | -4.97928007 | -0.57817264 |
| C    | 1.87706872  | 1.52686861  | -6.39550500 | H    | 3.92455821  | -3.48701778 | -0.20720645 |
| H    | 1.56726179  | 0.60598117  | -6.89861752 | O    | 2.08535079  | -2.41523631 | -1.96827391 |
| H    | 2.25896348  | 2.24505122  | -7.12088645 | Li   | 1.49863267  | -2.31631179 | -0.12652777 |
| C    | 0.77603094  | 2.09231172  | -5.48748817 | O    | 1.22206772  | -3.40302658 | 1.43770627  |
| H    | -0.21125374 | 1.77224465  | -5.82614398 | C    | 0.15097829  | -3.18030729 | 2.00469867  |
| N    | 1.10791530  | 1.40138589  | -4.22374178 | O    | 0.09057359  | -3.01769614 | 3.34595801  |
| C    | 0.15040940  | 0.88894901  | -3.28734447 | C    | -1.27998549 | -2.76684150 | 3.73013465  |
| C    | -1.15250063 | 1.45793974  | -3.22387497 | H    | -1.28453056 | -1.92189517 | 4.41791372  |

|   |             |             |             |   |             |            |             |
|---|-------------|-------------|-------------|---|-------------|------------|-------------|
| H | -1.65822569 | -3.66259228 | 4.23539473  | H | -1.64205531 | 3.89994134 | -6.50260767 |
| C | -2.03047091 | -2.48401696 | 2.41265738  | C | 3.71439143  | 1.58438235 | 3.82749024  |
| H | -2.09495829 | -1.40335860 | 2.24260268  | H | 4.38588533  | 1.49989118 | 4.69210657  |
| N | -1.07676745 | -3.05547983 | 1.43963225  | H | 4.33935409  | 1.84448862 | 2.96778722  |
| C | -1.20490576 | -2.90685458 | -0.00666393 | C | 2.70376710  | 2.68314303 | 4.07534837  |
| C | -2.08664406 | -3.71539395 | -0.63413099 | C | 2.43168405  | 3.13012799 | 5.37595168  |
| C | -2.39210601 | -3.64914278 | -2.10495461 | C | 1.49291964  | 4.13638066 | 5.60942599  |
| H | -2.28870102 | -2.63011008 | -2.49730979 | C | 0.81145797  | 4.71662318 | 4.53936118  |
| H | -1.73526092 | -4.29625343 | -2.70612203 | C | 1.08132533  | 4.28991743 | 3.23748835  |
| H | -3.42132186 | -3.96908152 | -2.30823381 | C | 2.02152608  | 3.28532437 | 3.00756305  |
| H | -2.57900544 | -4.48193857 | -0.04517074 | H | 2.23285950  | 2.96858314 | 1.98954622  |
| O | -0.43037100 | -1.98551768 | -0.55216836 | H | 0.56275030  | 4.74152042 | 2.39643577  |
| C | -3.43599713 | -3.10020221 | 2.36211481  | H | 0.08007796  | 5.50052033 | 4.71708038  |
| H | -3.83704634 | -2.94390114 | 1.35485333  | H | 1.29890557  | 4.46869699 | 6.62604053  |
| H | -3.35602746 | -4.18407980 | 2.51175341  | H | 2.97037704  | 2.69407822 | 6.21528168  |
| C | -4.36187230 | -2.49410792 | 3.39835716  | O | -0.85087205 | 1.53978469 | -0.56531339 |
| C | -4.75755595 | -3.22128175 | 4.52853023  | C | -1.18347887 | 2.36597810 | -1.47957975 |
| C | -5.59431117 | -2.65343740 | 5.49179857  | C | -0.41367101 | 3.70347131 | -1.57404184 |
| C | -6.04811977 | -1.34332578 | 5.33892055  | H | -0.59987569 | 4.14232943 | -2.56522101 |
| C | -5.66296016 | -0.60738062 | 4.21572555  | C | 1.09346318  | 3.55246047 | -1.34901590 |
| C | -4.82978140 | -1.17882756 | 3.25472004  | H | 1.57200446  | 2.95524364 | -2.13116677 |
| H | -4.54165982 | -0.59991412 | 2.37988973  | H | 1.58516247  | 4.53268144 | -1.33013770 |
| H | -6.01448436 | 0.41278651  | 4.08563911  | H | 1.28105995  | 3.05116528 | -0.39466425 |
| H | -6.69977120 | -0.89907098 | 6.08660564  | C | -1.02075700 | 4.65917493 | -0.52753099 |
| H | -5.89247776 | -3.23705394 | 6.35903306  | H | -0.88969170 | 4.24863874 | 0.48013934  |
| H | -4.41413764 | -4.24639316 | 4.65086406  | H | -0.53878881 | 5.64376896 | -0.56771274 |
| C | 3.98322988  | -4.68013747 | -5.62097512 | H | -2.09556103 | 4.80394775 | -0.69161056 |
| H | 4.78170016  | -4.58764244 | -6.36927057 | H | -2.27053251 | 2.55531384 | -1.61049620 |
| H | 4.39937599  | -5.28163325 | -4.80746329 |   |             |            |             |
| C | 2.78796010  | -5.38154041 | -6.22876703 |   |             |            |             |
| C | 2.64013219  | -5.48141632 | -7.61886295 |   |             |            |             |
| C | 1.53083431  | -6.11680570 | -8.17989278 |   |             |            |             |
| C | 0.55008826  | -6.66668041 | -7.35430550 |   |             |            |             |
| C | 0.68997163  | -6.58373317 | -5.96719017 |   |             |            |             |
| C | 1.80029558  | -5.95010923 | -5.40894032 |   |             |            |             |
| H | 1.90482230  | -5.89696883 | -4.32823990 |   |             |            |             |
| H | -0.06466292 | -7.01676424 | -5.31613328 |   |             |            |             |
| H | -0.31419229 | -7.16275941 | -7.78765461 |   |             |            |             |
| H | 1.43729140  | -6.18582314 | -9.26058091 |   |             |            |             |
| H | 3.40850076  | -5.06943036 | -8.27046853 |   |             |            |             |
| C | 0.82553412  | 3.63108777  | -5.35504716 |   |             |            |             |
| H | 0.13995957  | 3.92971737  | -4.55554672 |   |             |            |             |
| H | 1.83211984  | 3.92028905  | -5.02983977 |   |             |            |             |
| C | 0.46748434  | 4.33782188  | -6.64610004 |   |             |            |             |
| C | -0.86008513 | 4.36565841  | -7.09925255 |   |             |            |             |
| C | -1.19374613 | 4.99452339  | -8.29834885 |   |             |            |             |
| C | -0.20299961 | 5.61057458  | -9.06652417 |   |             |            |             |
| C | 1.12016511  | 5.59550178  | -8.62517626 |   |             |            |             |
| C | 1.45048651  | 4.96319476  | -7.42450978 |   |             |            |             |
| H | 2.48271963  | 4.96690283  | -7.08055908 |   |             |            |             |
| H | 1.89689460  | 6.07946599  | -9.21119014 |   |             |            |             |
| H | -0.46287249 | 6.10353301  | -9.99923218 |   |             |            |             |
| H | -2.22840596 | 5.00872829  | -8.63028848 |   |             |            |             |

**Table 31.** Geometric coordinates and thermally corrected MP2 energies for the transition state leading to (*R,S*)-**6** from LDA **5** mixed dimer with three THF

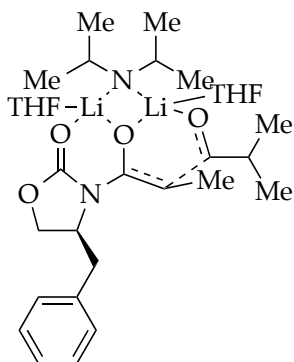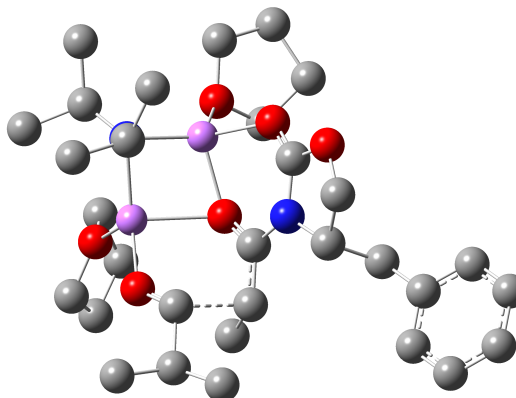

G = -1787.920851 Hartree

G<sub>MP2</sub> = -1118233.28 kcal/mol

ΔG<sub>MP2</sub> = 4.221059292 kcal/mol vs. **5** LDA mixed dimer with three THF

| Atom | X          | Y           | Z           | Atom | X           | Y           | Z          |
|------|------------|-------------|-------------|------|-------------|-------------|------------|
| Li   | 0.00000000 | 0.00000000  | 0.00000000  | O    | -0.66610284 | -1.27702979 | 3.83968753 |
| Li   | 0.00000000 | 0.00000000  | 2.61238600  | C    | -1.16965419 | -2.42092498 | 3.62827604 |
| N    | 1.51225768 | 0.00000000  | 1.26976654  | C    | -1.80196980 | -3.17317594 | 4.81347162 |
| C    | 2.34589095 | 1.20864602  | 1.24529876  | H    | -2.59094114 | -2.53601098 | 5.23282317 |
| H    | 1.65042150 | 2.00898199  | 0.93507602  | C    | -0.70980976 | -3.33512510 | 5.89195787 |
| C    | 2.90276616 | 1.69527612  | 2.61219566  | H    | -1.11959613 | -3.82081929 | 6.78589641 |
| H    | 3.71053434 | 1.05815741  | 2.98628151  | H    | 0.11746681  | -3.95548927 | 5.52302821 |
| H    | 3.30556949 | 2.71537369  | 2.52466791  | H    | -0.30046661 | -2.36220277 | 6.17461282 |
| H    | 2.10668055 | 1.70900187  | 3.36452444  | C    | -2.38442650 | -4.54183335 | 4.44238601 |
| C    | 3.49424506 | 1.25358233  | 0.20753087  | H    | -2.67279177 | -5.09635292 | 5.34277186 |
| H    | 3.88920582 | 2.27481408  | 0.11043304  | H    | -3.27475051 | -4.46353021 | 3.80979063 |
| H    | 4.33440108 | 0.61141386  | 0.49655539  | H    | -1.64184724 | -5.15254805 | 3.91075734 |
| H    | 3.14682378 | 0.92506717  | -0.77885930 | H    | -0.65191653 | -3.10128919 | 2.92137035 |
| C    | 2.13799080 | -1.32421250 | 1.40613649  | O    | -0.53438301 | 1.74774296  | 3.42880632 |
| H    | 1.28552701 | -2.00764068 | 1.58289765  | C    | -0.79695267 | 2.98404009  | 2.75663502 |
| C    | 3.07291924 | -1.54690466 | 2.62045015  | C    | -2.21661124 | 3.36597546  | 3.19900634 |
| H    | 3.29852312 | -2.61564654 | 2.74231379  | C    | -2.33232856 | 2.74902107  | 4.62041700 |
| H    | 4.03097154 | -1.02836224 | 2.49830452  | C    | -1.05983345 | 1.88160369  | 4.75834790 |
| H    | 2.60705819 | -1.19024853 | 3.54583548  | H    | -1.23263742 | 0.87030157  | 5.12846877 |
| C    | 2.83175904 | -1.90150651 | 0.14023526  | H    | -0.30940749 | 2.37694262  | 5.39118945 |
| H    | 2.19733593 | -1.77003744 | -0.74325244 | H    | -3.23785437 | 2.14236507  | 4.71035431 |
| H    | 3.79577753 | -1.42414228 | -0.06320235 | H    | -2.37045989 | 3.51599465  | 5.40019054 |
| H    | 3.02430715 | -2.97774923 | 0.26335386  | H    | -2.95208414 | 2.91527001  | 2.52576316 |



|   |             |             |             |
|---|-------------|-------------|-------------|
| H | -2.37283712 | 4.44912644  | 3.19165893  |
| H | -0.06001990 | 3.73734019  | 3.07428385  |
| H | -0.68447205 | 2.80778756  | 1.68489605  |
| O | -1.54859792 | -0.55108223 | 1.08561684  |
| C | -2.06545227 | -1.68985046 | 1.22544250  |
| N | -1.73120288 | -2.70311759 | 0.26023242  |
| C | -2.34011926 | -4.04491328 | 0.19106033  |
| C | -1.34771234 | -4.73123729 | -0.75460518 |
| H | -0.51646110 | -5.19947243 | -0.21707318 |
| H | -1.81123709 | -5.45747491 | -1.42284360 |
| O | -0.82315863 | -3.65078139 | -1.55242880 |
| C | -0.94958217 | -2.49055212 | -0.86307753 |
| O | -0.43185174 | -1.46237477 | -1.26437780 |
| H | -2.32760455 | -4.51795409 | 1.17460963  |
| C | -3.78312463 | -4.00111768 | -0.37039996 |
| H | -4.36672170 | -3.30737083 | 0.24426280  |
| H | -3.74494044 | -3.57690782 | -1.38128512 |
| C | -4.44211373 | -5.36391661 | -0.40127250 |
| C | -4.87878644 | -5.97321394 | 0.78479756  |
| C | -5.46177974 | -7.23983907 | 0.76662180  |
| C | -5.62133609 | -7.92119615 | -0.44229358 |
| C | -5.19686203 | -7.32524077 | -1.62996666 |
| C | -4.61195607 | -6.05730239 | -1.60712390 |
| H | -4.29310849 | -5.59512421 | -2.53906464 |
| H | -5.32307911 | -7.84376754 | -2.57663601 |
| H | -6.07769292 | -8.90710369 | -0.45758923 |
| H | -5.79608209 | -7.69303077 | 1.69604788  |
| H | -4.76973451 | -5.44733189 | 1.73127839  |
| C | -2.83974880 | -2.06524978 | 2.34752009  |
| H | -3.36032205 | -3.01347522 | 2.28891715  |
| C | -3.56652052 | -0.96711007 | 3.09069552  |
| H | -2.84818500 | -0.28991361 | 3.56382030  |
| H | -4.20552066 | -0.36651421 | 2.42901507  |
| H | -4.20581359 | -1.39062176 | 3.87294087  |
| O | -0.52178209 | 1.65830598  | -1.00018327 |
| C | 0.31737039  | 1.97290827  | -2.14273584 |
| C | -0.63471223 | 2.24616743  | -3.31861729 |
| C | -1.92592418 | 1.53077043  | -2.88608995 |
| C | -1.91100938 | 1.76133340  | -1.37769891 |
| H | -2.45907707 | 1.01961927  | -0.79315878 |
| H | -2.28196505 | 2.76505796  | -1.12294268 |
| H | -1.86143098 | 0.45821383  | -3.09951422 |
| H | -2.82294329 | 1.93157453  | -3.36826965 |
| H | -0.23430082 | 1.87602501  | -4.26681485 |
| H | -0.81503053 | 3.32205717  | -3.42684120 |
| H | 0.94660053  | 2.83167975  | -1.88942698 |
| H | 0.96345423  | 1.10816051  | -2.32656674 |

**Table 32.** Geometric coordinates and thermally corrected MP2 energies for the transition state leading to (*S,R*)-**6** from LDA **5** mixed dimer with three THF

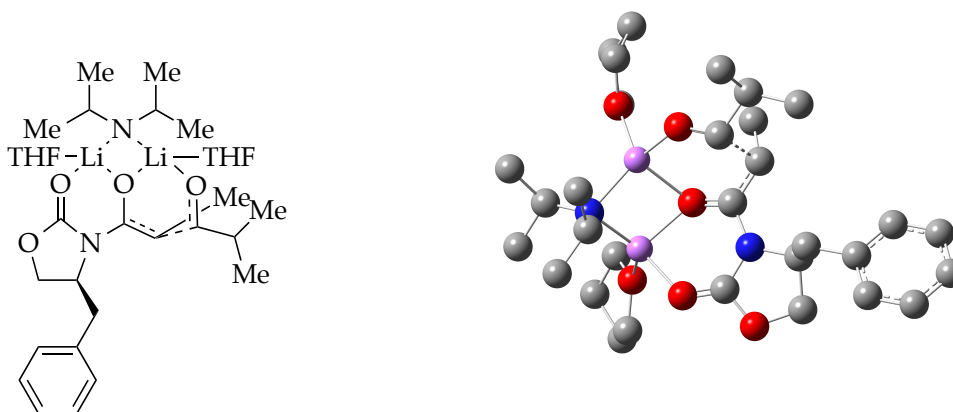

G = -1787.918608 Hartree

G<sub>MP2</sub> = -1118229.796 kcal/mol

ΔG<sub>MP2</sub> = 7.705352619 kcal/mol vs. 5 LDA mixed dimer with three THF

| Atom | X           | Y           | Z          | Atom | X           | Y           | Z           |
|------|-------------|-------------|------------|------|-------------|-------------|-------------|
| Li   | 0.00000000  | 0.00000000  | 0.00000000 | H    | -3.57571582 | -0.85537765 | 3.05084482  |
| O    | 0.00000000  | 0.00000000  | 2.13893550 | N    | -1.17203781 | 1.62591670  | -0.21431003 |
| C    | 1.09260373  | 0.00000000  | 2.76294633 | C    | -0.35105552 | 2.81376806  | -0.49996286 |
| N    | 1.34869072  | 1.10317427  | 3.65419765 | H    | 0.32809433  | 2.88787276  | 0.36881757  |
| C    | 2.42948393  | 1.17060803  | 4.65530532 | C    | 0.60574884  | 2.71187603  | -1.71976657 |
| C    | 1.76946588  | 2.07736765  | 5.70250138 | H    | 0.07282427  | 2.75234668  | -2.67547668 |
| H    | 1.21861669  | 1.50886720  | 6.46012356 | H    | 1.32786785  | 3.54177579  | -1.71349553 |
| H    | 2.46707674  | 2.75833349  | 6.19063771 | H    | 1.17235364  | 1.77445648  | -1.68342168 |
| O    | 0.82723676  | 2.86022369  | 4.94412426 | C    | -1.07619377 | 4.17981629  | -0.54886858 |
| C    | 0.50376812  | 2.18933584  | 3.80889329 | H    | -0.34893540 | 5.00361352  | -0.54645997 |
| O    | -0.40220537 | 2.57528951  | 3.09349360 | H    | -1.68453304 | 4.29100843  | -1.45446520 |
| Li   | -1.29967818 | 1.44954228  | 1.75737504 | H    | -1.73320827 | 4.30579458  | 0.31949654  |
| O    | -3.01125876 | 1.11624870  | 2.77621831 | C    | -2.36944612 | 1.34879159  | -1.01293566 |
| C    | -3.92610927 | 0.03181908  | 2.50820730 | H    | -2.65185656 | 0.31828369  | -0.72885310 |
| C    | -5.29648366 | 0.50196417  | 3.00893208 | C    | -2.20423696 | 1.29691689  | -2.55156796 |
| C    | -4.91474527 | 1.48538490  | 4.12715459 | H    | -3.10259875 | 0.87464226  | -3.02430248 |
| C    | -3.66581353 | 2.14804537  | 3.54637464 | H    | -2.05242015 | 2.29362867  | -2.98216344 |
| H    | -2.95636977 | 2.50888826  | 4.29425623 | H    | -1.34688365 | 0.67419333  | -2.83028075 |
| H    | -3.92593608 | 2.98065056  | 2.87913847 | C    | -3.63158007 | 2.19608396  | -0.68471732 |
| H    | -4.66849651 | 0.94378396  | 5.04838179 | H    | -3.78092011 | 2.24920453  | 0.39986907  |
| H    | -5.70403068 | 2.20766727  | 4.35628256 | H    | -3.55903992 | 3.22152848  | -1.06072988 |
| H    | -5.92169834 | -0.32733690 | 3.35336823 | H    | -4.53108065 | 1.74771809  | -1.13327728 |
| H    | -5.83511261 | 1.02569652  | 2.21104588 | H    | 2.61795304  | 0.17496552  | 5.06258991  |
| H    | -3.90613625 | -0.17928691 | 1.43481425 | C    | 3.73326766  | 1.77086928  | 4.07825766  |

|   |             |             |             |
|---|-------------|-------------|-------------|
| H | 4.03393870  | 1.16963924  | 3.21536087  |
| H | 3.51065946  | 2.77666559  | 3.70177883  |
| C | 4.85279188  | 1.82916831  | 5.09656956  |
| C | 5.51401351  | 0.65922336  | 5.50034508  |
| C | 6.52868945  | 0.70384102  | 6.45605973  |
| C | 6.90300427  | 1.92317795  | 7.02553364  |
| C | 6.25844852  | 3.09510723  | 6.62930197  |
| C | 5.24186485  | 3.04588889  | 5.67307945  |
| H | 4.75225481  | 3.96572234  | 5.36030514  |
| H | 6.54802271  | 4.05004771  | 7.05969859  |
| H | 7.69568662  | 1.95892446  | 7.76781549  |
| H | 7.03199008  | -0.21286323 | 6.75182796  |
| H | 5.24048132  | -0.29421047 | 5.05310943  |
| C | 2.09976392  | -0.97662858 | 2.58405099  |
| H | 2.94032209  | -0.93849140 | 3.26881997  |
| C | 1.64793896  | -2.36486667 | 2.18291697  |
| H | 1.17386733  | -2.34260954 | 1.19608774  |
| H | 2.50156836  | -3.05008766 | 2.13751489  |
| H | 0.92287031  | -2.78853880 | 2.89218823  |
| O | -0.74444934 | -1.74188709 | -0.77686341 |
| C | -1.73955221 | -2.61949424 | -0.21552139 |
| C | -1.68011024 | -3.91256873 | -1.03970066 |
| C | -0.22489523 | -3.91711347 | -1.53536201 |
| C | 0.02375587  | -2.43041047 | -1.78774720 |
| H | -0.33835384 | -2.12636180 | -2.77963434 |
| H | 1.06242310  | -2.11700019 | -1.66836819 |
| H | -0.07494235 | -4.52769955 | -2.43108356 |
| H | 0.44642989  | -4.28726680 | -0.75133726 |
| H | -2.37001415 | -3.85745456 | -1.88996421 |
| H | -1.94197058 | -4.79573653 | -0.44894069 |
| H | -1.48893618 | -2.79437052 | 0.83821049  |
| H | -2.71338506 | -2.12112710 | -0.26661687 |
| O | 1.86346214  | -0.35577081 | -0.10204662 |
| C | 2.83520616  | -0.23579606 | 0.69956651  |
| H | 3.07682759  | 0.77123440  | 1.09325271  |
| C | 4.08671699  | -1.09482073 | 0.44311096  |
| C | 4.64783712  | -0.67637869 | -0.93321327 |
| H | 4.97797644  | 0.37063336  | -0.92045337 |
| H | 5.51264216  | -1.29551334 | -1.20130837 |
| H | 3.88623036  | -0.77897267 | -1.71022628 |
| C | 5.17870524  | -0.98081464 | 1.51193665  |
| H | 5.45564297  | 0.06782548  | 1.68382817  |
| H | 4.87490090  | -1.41435713 | 2.46995118  |
| H | 6.08720883  | -1.50300314 | 1.18987491  |
| H | 3.75636069  | -2.13813153 | 0.36420124  |

**Table 33.** Geometric coordinates and thermally corrected MP2 energies for the transition state leading to (*R,R*)-6 from LDA 5 mixed dimer with three THF

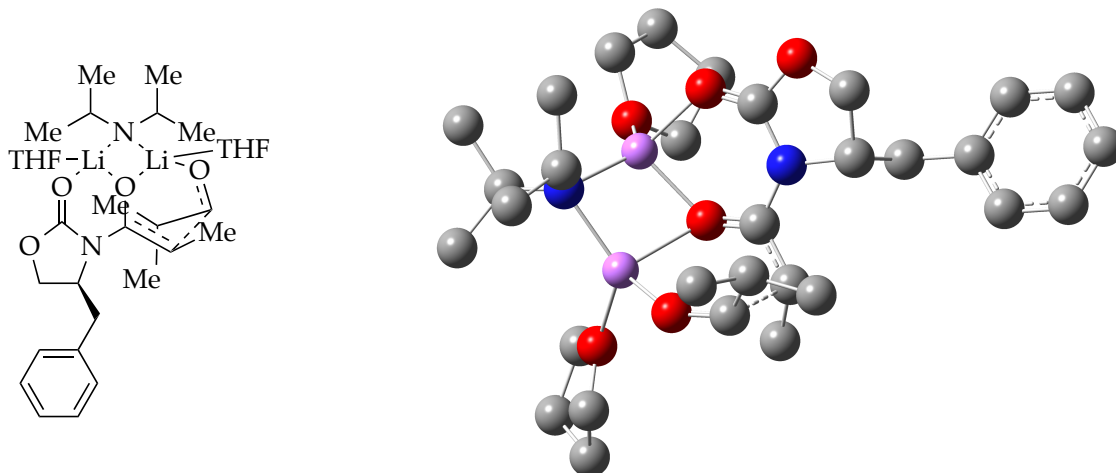

G = -1787.921424 Hartree

G<sub>MP2</sub> = -1118232.972 kcal/mol

ΔG<sub>MP2</sub> = 4.529442357 kcal/mol vs. 5 LDA mixed dimer with three THF

| Atom | X           | Y           | Z          | Atom | X           | Y           | Z           |
|------|-------------|-------------|------------|------|-------------|-------------|-------------|
| Li   | 0.00000000  | 0.00000000  | 0.00000000 | H    | -3.24316615 | -2.95795888 | 3.14160359  |
| O    | 0.00000000  | 0.00000000  | 2.17324780 | N    | -1.12823821 | -1.66928111 | -0.18890581 |
| C    | 1.09212466  | 0.00000000  | 2.79511352 | C    | -2.40777195 | -1.53762934 | -0.89585269 |
| N    | 1.39521715  | -1.13901433 | 3.61995352 | H    | -2.97805903 | -0.81087986 | -0.28928500 |
| C    | 2.45562201  | -1.17757273 | 4.64476528 | C    | -2.35215182 | -0.90081595 | -2.31287690 |
| C    | 2.46213636  | -2.67795532 | 4.96169457 | H    | -1.94210608 | -1.58405723 | -3.06333089 |
| H    | 3.16412139  | -3.23205487 | 4.32954523 | H    | -3.35883909 | -0.61159127 | -2.65061341 |
| H    | 2.65766378  | -2.90110974 | 6.01098565 | H    | -1.72481657 | -0.00270970 | -2.29954689 |
| O    | 1.12526579  | -3.11136824 | 4.64569338 | C    | -3.31270920 | -2.79258826 | -0.96279536 |
| C    | 0.57648398  | -2.24892031 | 3.75444642 | H    | -4.32297689 | -2.52590639 | -1.30489834 |
| O    | -0.48781372 | -2.49829476 | 3.21749379 | H    | -2.92414206 | -3.54218526 | -1.66225500 |
| Li   | -1.30145774 | -1.42758815 | 1.76492677 | H    | -3.39967643 | -3.26736075 | 0.02151420  |
| O    | -3.07833541 | -0.97226495 | 2.59846539 | C    | -0.19149265 | -2.74468399 | -0.54991164 |
| C    | -3.89607246 | -2.08427752 | 3.04334648 | H    | 0.74273079  | -2.47335326 | -0.02656401 |
| C    | -4.50075157 | -1.66193024 | 4.39200519 | C    | 0.21222225  | -2.86112459 | -2.03960330 |
| C    | -3.52209816 | -0.57985854 | 4.87777585 | H    | 1.07073435  | -3.53742284 | -2.15610358 |
| C    | -3.13816740 | 0.09571424  | 3.56320389 | H    | -0.60025647 | -3.26561340 | -2.65510536 |
| H    | -2.16129850 | 0.58472965  | 3.56797854 | H    | 0.49298877  | -1.88312401 | -2.44706507 |
| H    | -3.90079571 | 0.82498605  | 3.25275499 | C    | -0.52895412 | -4.16473272 | -0.01631171 |
| H    | -2.63920495 | -1.03977878 | 5.33647042 | H    | -0.79233820 | -4.12407453 | 1.04684131  |
| H    | -3.96649856 | 0.11391292  | 5.59817458 | H    | -1.36240802 | -4.62888191 | -0.55371016 |
| H    | -4.59202619 | -2.50349399 | 5.08483416 | H    | 0.33824182  | -4.83336070 | -0.12199199 |
| H    | -5.49947348 | -1.23265250 | 4.25043665 | H    | 3.41161113  | -0.87625895 | 4.21588646  |
| H    | -4.65095731 | -2.29040211 | 2.27854295 | C    | 2.11227611  | -0.28992478 | 5.86561825  |

|   |             |             |             |
|---|-------------|-------------|-------------|
| H | 1.91133021  | 0.72308126  | 5.49948965  |
| H | 1.18117612  | -0.66050487 | 6.31188293  |
| C | 3.21610130  | -0.26703316 | 6.90137629  |
| C | 4.39689837  | 0.45403244  | 6.66840331  |
| C | 5.43048005  | 0.45670846  | 7.60442256  |
| C | 5.30024198  | -0.26197480 | 8.79512772  |
| C | 4.12941707  | -0.97875789 | 9.04259993  |
| C | 3.09721355  | -0.97994297 | 8.10190654  |
| H | 2.18246498  | -1.53214734 | 8.30755360  |
| H | 4.01509222  | -1.53488552 | 9.96921982  |
| H | 6.10410953  | -0.25827118 | 9.52606328  |
| H | 6.33593099  | 1.02417305  | 7.40667146  |
| H | 4.50394837  | 1.02715771  | 5.74952858  |
| C | 2.08802893  | 0.99258051  | 2.61733336  |
| H | 2.93503719  | 0.96603279  | 3.29599029  |
| C | 1.61481462  | 2.38773796  | 2.25438112  |
| H | 0.97104539  | 2.35704224  | 1.37130250  |
| H | 1.04894444  | 2.86069753  | 3.06959377  |
| H | 2.47238435  | 3.03345937  | 2.03226198  |
| O | 1.85444072  | 0.28530807  | -0.01835068 |
| C | 2.84184419  | 0.39506542  | 0.77045453  |
| C | 3.74809479  | -0.82880454 | 1.02491698  |
| H | 3.18279847  | -1.56631532 | 1.61101083  |
| C | 4.08593936  | -1.48268231 | -0.32854851 |
| H | 4.64898208  | -0.79040922 | -0.96802354 |
| H | 4.70174165  | -2.37851011 | -0.18178068 |
| H | 3.17295917  | -1.76342635 | -0.85827690 |
| C | 5.03767052  | -0.45364822 | 1.76679787  |
| H | 4.84942828  | 0.02178770  | 2.73624215  |
| H | 5.66091802  | -1.33786883 | 1.94421678  |
| H | 5.63268758  | 0.25100516  | 1.17163806  |
| H | 3.42525960  | 1.33918143  | 0.73044289  |
| O | -0.68317644 | 1.79400243  | -0.68033881 |
| C | -1.95676818 | 2.43909140  | -0.47035905 |
| C | -1.99000822 | 3.63658253  | -1.43055969 |
| C | -0.49628400 | 3.94167776  | -1.63116869 |
| C | 0.10645402  | 2.53819430  | -1.63152374 |
| H | 1.14565907  | 2.47715054  | -1.30448010 |
| H | 0.01777248  | 2.06665605  | -2.62046411 |
| H | -0.10547023 | 4.52493691  | -0.78865202 |
| H | -0.28720315 | 4.49075527  | -2.55441072 |
| H | -2.55638435 | 4.48038294  | -1.02472768 |
| H | -2.44820171 | 3.34936258  | -2.38399424 |
| H | -2.75367757 | 1.71293540  | -0.65723992 |
| H | -2.00776951 | 2.75529693  | 0.57901283  |

**Table 34.** Geometric coordinates and thermally corrected MP2 energies for the transition state leading to (*S,S*)-6 from LDA 5 mixed dimer with three THF

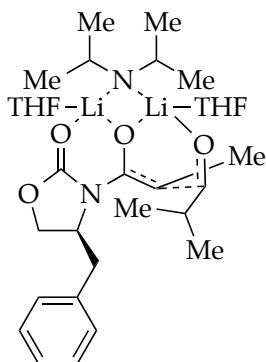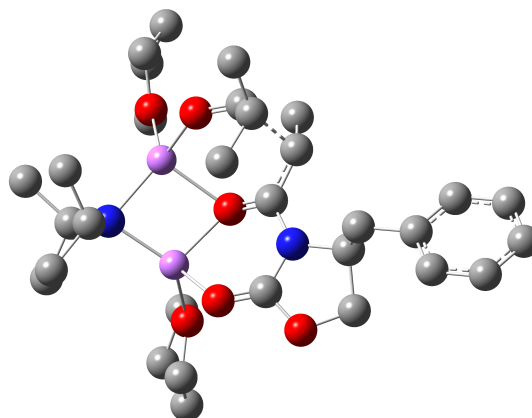

$G = -1787.915442$  Hartree

$G_{\text{MP2}} = -1118229.026$  kcal/mol

$\Delta G_{\text{MP2}} = 8.475350098$  kcal/mol vs. 5 LDA mixed dimer with three THF

| Atom | X           | Y           | Z           | Atom | X           | Y           | Z           |
|------|-------------|-------------|-------------|------|-------------|-------------|-------------|
| Li   | 0.00000000  | 0.00000000  | 0.00000000  | C    | 0.15759342  | 2.60915063  | -1.92455062 |
| O    | 0.00000000  | 0.00000000  | 2.11375040  | H    | -0.44526068 | 2.49547315  | -2.83160386 |
| C    | 1.05391460  | 0.00000000  | 2.79457845  | H    | 0.77537299  | 3.51007301  | -2.05429319 |
| N    | 1.17998089  | 1.00309641  | 3.81916230  | H    | 0.83338624  | 1.74919929  | -1.85332084 |
| C    | 2.04391571  | 0.91066798  | 5.01143557  | C    | -1.58550127 | 3.99744023  | -0.74886572 |
| C    | 1.18119996  | 1.68232810  | 6.02153602  | H    | -0.95291312 | 4.88922765  | -0.85736435 |
| H    | 0.49342889  | 1.02899430  | 6.56960377  | H    | -2.25364063 | 3.96970606  | -1.61826349 |
| H    | 1.76252459  | 2.27683496  | 6.72653632  | H    | -2.20224705 | 4.12658095  | 0.14832565  |
| O    | 0.40282009  | 2.58222034  | 5.20542792  | C    | -2.59065743 | 1.01949925  | -0.87620386 |
| C    | 0.31092991  | 2.07282235  | 3.95031028  | H    | -2.75376532 | 0.00441718  | -0.46731351 |
| O    | -0.43527159 | 2.56050148  | 3.12167372  | C    | -2.52015284 | 0.81822512  | -2.41042522 |
| Li   | -1.34989083 | 1.41025331  | 1.77816483  | H    | -3.39816534 | 0.26270462  | -2.77089435 |
| O    | -2.97460238 | 1.02410203  | 2.94006317  | H    | -2.50275367 | 1.77356093  | -2.94754039 |
| C    | -3.82405225 | -0.12961728 | 2.75461817  | H    | -1.62087321 | 0.25744931  | -2.68751871 |
| C    | -5.23124211 | 0.31464590  | 3.16569191  | C    | -3.90971840 | 1.77564294  | -0.54647249 |
| C    | -4.93485922 | 1.40030353  | 4.21228583  | H    | -3.99289547 | 1.94040901  | 0.53380343  |
| C    | -3.69558990 | 2.07504438  | 3.62228679  | H    | -3.96764038 | 2.75255946  | -1.03661918 |
| H    | -3.02622830 | 2.51548866  | 4.36485033  | H    | -4.78541262 | 1.19473195  | -0.87386148 |
| H    | -3.96823350 | 2.84861381  | 2.89239028  | H    | 2.15344927  | -0.13686576 | 5.30180070  |
| H    | -4.69971907 | 0.94543292  | 5.18217036  | C    | 3.43537094  | 1.55468918  | 4.80588285  |
| H    | -5.76302727 | 2.10063120  | 4.35645684  | H    | 3.91223731  | 1.08302649  | 3.94168955  |
| H    | -5.83334989 | -0.51219160 | 3.55448962  | H    | 3.29312901  | 2.61063122  | 4.54731540  |
| H    | -5.75851636 | 0.74770071  | 2.30825935  | C    | 4.32231264  | 1.42644623  | 6.02694005  |
| H    | -3.75471475 | -0.44303074 | 1.70906773  | C    | 4.88647322  | 0.18856764  | 6.37063019  |
| H    | -3.44999299 | -0.94073642 | 3.39278278  | C    | 5.68636078  | 0.05635935  | 7.50519787  |
| N    | -1.37826984 | 1.48637207  | -0.19919115 | C    | 5.93948457  | 1.16412922  | 8.31768936  |
| C    | -0.71380387 | 2.72291585  | -0.64368683 | C    | 5.38985034  | 2.40231080  | 7.98496366  |
| H    | 0.01188803  | 2.94259801  | 0.15892008  | C    | 4.58785308  | 2.52993252  | 6.84873543  |

|   |             |             |             |
|---|-------------|-------------|-------------|
| H | 4.17347693  | 3.50175770  | 6.58870395  |
| H | 5.58780232  | 3.27220064  | 8.60552009  |
| H | 6.56580491  | 1.06284665  | 9.19974522  |
| H | 6.11796579  | -0.91012605 | 7.75169095  |
| H | 4.70678919  | -0.67773000 | 5.73680971  |
| C | 2.13160162  | -0.89491874 | 2.56361067  |
| H | 2.96826768  | -0.82765516 | 3.25604681  |
| C | 1.75359492  | -2.31681698 | 2.17684398  |
| H | 1.13273992  | -2.31850907 | 1.27644149  |
| H | 2.65465773  | -2.90596055 | 1.97099218  |
| H | 1.19761420  | -2.83175424 | 2.97300398  |
| O | -0.47023559 | -1.82602765 | -0.85712701 |
| C | -1.56111778 | -2.74742786 | -0.65779770 |
| C | -1.23711477 | -3.99632742 | -1.49907840 |
| C | 0.28024423  | -3.87587000 | -1.72177953 |
| C | 0.45562981  | -2.36306495 | -1.82267683 |
| H | 0.19232319  | -1.99824601 | -2.82650748 |
| H | 1.44220506  | -1.98525014 | -1.55131542 |
| H | 0.62684564  | -4.40443932 | -2.61520818 |
| H | 0.83149495  | -4.26307354 | -0.85672440 |
| H | -1.76336198 | -3.95766765 | -2.45970798 |
| H | -1.52889092 | -4.92318933 | -0.99590387 |
| H | -1.61438690 | -2.97275377 | 0.41401419  |
| H | -2.49772031 | -2.26693072 | -0.96003075 |
| O | 1.88021883  | -0.08608408 | -0.05045950 |
| C | 2.85975086  | -0.25875127 | 0.74265269  |
| C | 3.84730797  | 0.89880887  | 0.97852197  |
| C | 4.87635935  | 0.87197829  | -0.17142017 |
| H | 5.63721289  | 1.64909745  | -0.03038626 |
| H | 5.39110466  | -0.09497614 | -0.22991353 |
| H | 4.38046571  | 1.05044033  | -1.13211223 |
| C | 3.16861103  | 2.26871334  | 1.05479891  |
| H | 2.44518909  | 2.32441857  | 1.87306880  |
| H | 3.91238827  | 3.06077975  | 1.20444604  |
| H | 2.62696010  | 2.47582672  | 0.12772830  |
| H | 4.39606794  | 0.69801264  | 1.90966763  |
| H | 3.40565755  | -1.22276248 | 0.67403868  |

**Table 35.** Geometric coordinates and thermally corrected MP2 energies for the transition state leading to (*R*)-7 from 5 monomer with three THF

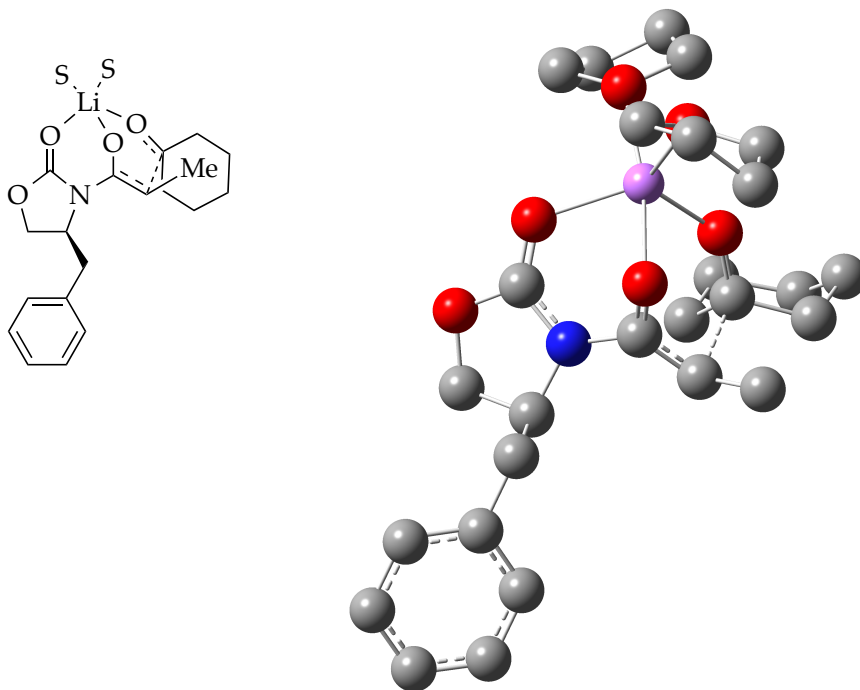

G = -1566.085972 Hartree

G<sub>MP2</sub> = -979574.4836 kcal/mol

ΔG<sub>MP2</sub> = 6.418902434 kcal/mol vs. 5 monomer with three THF

| Atom | X          | Y           | Z          | Atom | X           | Y           | Z           |
|------|------------|-------------|------------|------|-------------|-------------|-------------|
| Li   | 0.00000000 | 0.00000000  | 0.00000000 | H    | 2.53810572  | -4.76645494 | 5.36128284  |
| O    | 0.00000000 | 0.00000000  | 2.19833890 | H    | 4.20399388  | -5.71216760 | 6.92638182  |
| C    | 1.20354930 | 0.00000000  | 2.49321960 | H    | 5.90072955  | -4.23350477 | 7.98744913  |
| N    | 1.95048797 | -1.22185806 | 2.23807992 | H    | 5.90787849  | -1.80003956 | 7.46841953  |
| C    | 2.92025224 | -1.82318067 | 3.15707186 | H    | 4.24187105  | -0.85801470 | 5.90517831  |
| C    | 3.35380295 | -3.05228118 | 2.33088104 | C    | 1.94831622  | 1.15685573  | 2.85220079  |
| H    | 4.29455023 | -2.87907259 | 1.79788897 | H    | 2.96551642  | 0.98722797  | 3.20357548  |
| H    | 3.44025547 | -3.96266562 | 2.92629976 | C    | 1.18408254  | 2.23481650  | 3.59747890  |
| O    | 2.31157678 | -3.24322928 | 1.35432413 | H    | 0.28995007  | 2.53095615  | 3.04106149  |
| C    | 1.58085049 | -2.10017563 | 1.25019742 | H    | 0.85036139  | 1.89014244  | 4.58690788  |
| O    | 0.76543373 | -1.93745865 | 0.35788765 | H    | 1.80076917  | 3.12462079  | 3.75495721  |
| H    | 3.76903713 | -1.15131136 | 3.31401612 | O    | -1.96274204 | 0.63110139  | 0.04812905  |
| C    | 2.28354721 | -2.16984310 | 4.52382687 | C    | -2.88685299 | -0.28317419 | 0.68170167  |
| H    | 1.84204011 | -1.25020083 | 4.92644165 | C    | -3.78615035 | 0.57277826  | 1.58310764  |
| H    | 1.45802529 | -2.87199919 | 4.35559349 | C    | -2.87540149 | 1.76678240  | 1.91214264  |
| C    | 3.27858807 | -2.74778314 | 5.50678799 | C    | -2.12756115 | 1.95913363  | 0.59428106  |
| C    | 4.23768951 | -1.92537619 | 6.11735908 | H    | -1.12859521 | 2.38814904  | 0.69834102  |
| C    | 5.17627798 | -2.45486559 | 7.00236303 | H    | -2.71291562 | 2.56229233  | -0.11561503 |
| C    | 5.17183406 | -3.82073097 | 7.29536545 | H    | -2.16537349 | 1.49770532  | 2.69960756  |
| C    | 4.22118956 | -4.64949161 | 6.69929437 | H    | -3.42866560 | 2.66047719  | 2.21862505  |
| C    | 3.28390055 | -4.11533998 | 5.81242520 | H    | -4.12169299 | 0.02684406  | 2.47021921  |



|   |             |             |             |
|---|-------------|-------------|-------------|
| H | -4.67534624 | 0.90865438  | 1.03555759  |
| H | -3.43825740 | -0.81577488 | -0.10050351 |
| H | -2.30396222 | -1.00529076 | 1.26404207  |
| O | -0.07035577 | -0.34862271 | -2.05677666 |
| C | 0.02257864  | 0.86120797  | -2.84321581 |
| C | 0.96329255  | 0.54664885  | -4.02739666 |
| C | 1.62745699  | -0.77901112 | -3.61141505 |
| C | 0.52168188  | -1.43290481 | -2.78555114 |
| H | 0.86446839  | -2.16319970 | -2.05172027 |
| H | -0.23354056 | -1.90116598 | -3.43672592 |
| H | 2.50199704  | -0.59135875 | -2.97807310 |
| H | 1.94312848  | -1.38825038 | -4.46446400 |
| H | 1.68727015  | 1.34799757  | -4.20328347 |
| H | 0.38975199  | 0.40956784  | -4.95131701 |
| H | -0.98102250 | 1.15080936  | -3.17668603 |
| H | 0.41680766  | 1.63581979  | -2.18033019 |
| O | 1.18766196  | 1.49012029  | 0.19234099  |
| C | 2.23069327  | 1.79398688  | 0.88078581  |
| C | 2.48013659  | 3.29697734  | 1.09408512  |
| C | 3.01228005  | 3.90706431  | -0.21942735 |
| C | 4.29261636  | 3.19947476  | -0.68835417 |
| C | 4.08343298  | 1.68233060  | -0.81204945 |
| C | 3.54387369  | 1.07960647  | 0.50217233  |
| H | 4.29906677  | 1.20665858  | 1.28974567  |
| H | 3.36273015  | 0.00771982  | 0.37579432  |
| H | 3.36100175  | 1.47593216  | -1.61269091 |
| H | 5.02349626  | 1.18885382  | -1.09333872 |
| H | 5.09810622  | 3.39364219  | 0.03666777  |
| H | 4.63018300  | 3.61661753  | -1.64647253 |
| H | 3.19794535  | 4.98091163  | -0.08437112 |
| H | 2.23495306  | 3.81045977  | -0.98841586 |
| H | 3.21503745  | 3.46483000  | 1.89250966  |
| H | 1.54590896  | 3.78696355  | 1.38342040  |

**Table 36.** Geometric coordinates and thermally corrected MP2 energies for the transition state leading to (S)-7 from 5 monomer with three THF

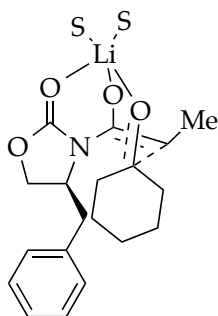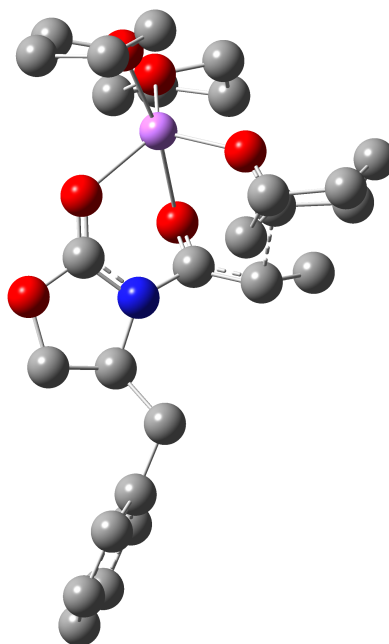

G = -1566.08112 Hartree

G<sub>MP2</sub> = -979571.1681 kcal/mol

ΔG<sub>MP2</sub> = 9.734378081 kcal/mol vs. 5 monomer with three THF

| Atom | X          | Y           | Z           | Atom | X           | Y           | Z           |
|------|------------|-------------|-------------|------|-------------|-------------|-------------|
| Li   | 0.00000000 | 0.00000000  | 0.00000000  | C    | 5.29427834  | 1.30668095  | 5.92216250  |
| O    | 0.00000000 | 0.00000000  | 2.06946300  | C    | 6.04340586  | 1.00149039  | 7.06047788  |
| C    | 1.00575259 | 0.00000000  | 2.76030870  | C    | 6.80731831  | -0.16505170 | 7.10363428  |
| N    | 2.31037179 | 0.18354881  | 2.35785722  | C    | 6.82144580  | -1.02117829 | 6.00011926  |
| C    | 2.65199174 | -0.12078741 | 0.95609848  | C    | 6.07381456  | -0.71168717 | 4.86430987  |
| O    | 2.02705647 | -1.04110522 | 0.41554487  | H    | 6.10229908  | -1.37773607 | 4.00437538  |
| C    | 3.52053524 | 0.77247802  | 0.26935529  | H    | 7.42074268  | -1.92757005 | 6.02113012  |
| H    | 4.11122931 | 1.44029422  | 0.89137809  | H    | 7.39286366  | -0.40309070 | 7.98743595  |
| C    | 4.24945912 | 0.17301714  | -0.92147285 | H    | 6.03252330  | 1.67856227  | 7.91052117  |
| H    | 3.53787490 | -0.18355573 | -1.67250752 | H    | 4.71093395  | 2.22443816  | 5.89220974  |
| H    | 4.86846336 | -0.68661431 | -0.62896542 | H    | 3.54401695  | -1.17443405 | 3.39499237  |
| H    | 4.90927199 | 0.90594080  | -1.39436022 | O    | -0.40852530 | -1.66836743 | -1.14210967 |
| C    | 3.22163561 | -0.12558846 | 3.47653310  | C    | -0.21726757 | -3.00266412 | -0.61964150 |
| C    | 2.25516665 | 0.03652722  | 4.66311096  | C    | 0.48552880  | -3.79973121 | -1.72618046 |
| H    | 2.30663852 | 1.04515947  | 5.08958057  | C    | 1.23974928  | -2.69879729 | -2.48821714 |
| H    | 2.40803545 | -0.69792953 | 5.45447390  | C    | 0.24536849  | -1.54086979 | -2.42640886 |
| O    | 0.94219342 | -0.15447101 | 4.10789619  | H    | 0.70936303  | -0.55196165 | -2.45965837 |
| C    | 4.46721811 | 0.77040291  | 3.57982444  | H    | -0.51336495 | -1.61587969 | -3.21882883 |
| H    | 5.07211935 | 0.63038703  | 2.67823313  | H    | 2.15277115  | -2.42549945 | -1.95085639 |
| H    | 4.14501541 | 1.81825784  | 3.59169684  | H    | 1.49792108  | -2.98026046 | -3.51419892 |
| C    | 5.29594535 | 0.45475783  | 4.80984059  | H    | 1.14333462  | -4.57578448 | -1.32263163 |

|   |             |             |             |
|---|-------------|-------------|-------------|
| H | -0.24877957 | -4.28504186 | -2.38087410 |
| H | -1.19718029 | -3.41253449 | -0.35069360 |
| H | 0.40314737  | -2.92649335 | 0.27870888  |
| O | -1.96014626 | 0.67057913  | -0.12669750 |
| C | -2.26967097 | 2.02139715  | -0.48126823 |
| C | -2.69861711 | 2.68497575  | 0.83645676  |
| C | -3.28086971 | 1.50639749  | 1.66472067  |
| C | -2.96156164 | 0.25864850  | 0.81120067  |
| H | -2.54881199 | -0.57291426 | 1.38457256  |
| H | -3.84960237 | -0.08760560 | 0.26172506  |
| H | -2.79719325 | 1.44149924  | 2.64269810  |
| H | -4.35835212 | 1.60758613  | 1.82930341  |
| H | -1.82719519 | 3.11221482  | 1.34125187  |
| H | -3.42211329 | 3.49037413  | 0.67524356  |
| H | -3.08995763 | 2.02806800  | -1.21662676 |
| H | -1.37167634 | 2.44134403  | -0.93661009 |
| O | 1.05324844  | 1.34702807  | -0.81125117 |
| C | 2.08223259  | 2.03811031  | -0.45433243 |
| C | 1.89024688  | 3.01650517  | 0.72578193  |
| C | 1.12428305  | 4.26945456  | 0.25303674  |
| C | 1.82735459  | 4.95078870  | -0.92949607 |
| C | 2.06667204  | 3.96083078  | -2.07824474 |
| C | 2.85317367  | 2.72353946  | -1.59943015 |
| H | 2.97947191  | 2.01808206  | -2.42543341 |
| H | 3.85018851  | 3.04166705  | -1.26592869 |
| H | 1.10292861  | 3.62836046  | -2.48569236 |
| H | 2.60823801  | 4.45093189  | -2.89831585 |
| H | 1.23773811  | 5.80827986  | -1.28031983 |
| H | 2.79432585  | 5.35498670  | -0.59225612 |
| H | 0.11165524  | 3.97373231  | -0.04900699 |
| H | 1.01214010  | 4.97341535  | 1.08883782  |
| H | 2.86234625  | 3.33008331  | 1.12982878  |
| H | 1.33721006  | 2.52215749  | 1.52926679  |

## Part 8: 5 IRC Computations

Geometries are optimized at the B3LYP level of theory using the 6-31G(d) basis set. Energies are defined as follows:  $G$  is the sum of electronic and thermal free energies calculated at the B3LYP level of theory ( $T = 195$  K).  $G_{\text{MP2}}$  is derived from an MP2 SP calculation corresponding to the DFT-optimized geometry and includes a thermal correction from the DFT calculation.

**Table 37.** Geometric coordinates and thermally corrected MP2 energies for IRC derived reactants leading to (*R,S*)-**6** from **5** monomer with three THF

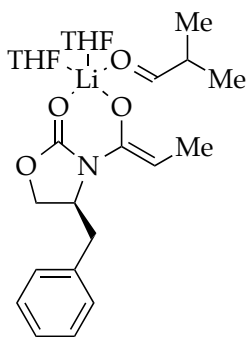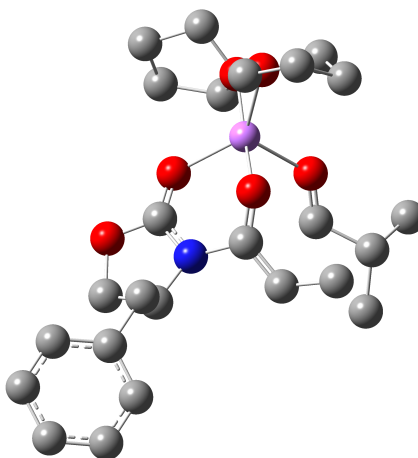

$G = -1488.708185$  Hartree

$G_{\text{MP2}} = -931174.079$  kcal/mol

$\Delta G_{\text{MP2}} = -2.729626092$  kcal/mol Li vs. **5** monomer with three THF

$\Delta G_{\text{MP2}} = 3.802059799$  kcal/mol Li vs. (*R,S*)-**6** transition state

| Atom | X          | Y           | Z           | Atom | X           | Y           | Z           |
|------|------------|-------------|-------------|------|-------------|-------------|-------------|
| Li   | 0.00000000 | 0.00000000  | 0.00000000  | C    | 3.10546634  | -5.50577838 | 6.27929520  |
| O    | 0.00000000 | 0.00000000  | 1.94046660  | C    | 2.44652435  | -4.79680075 | 5.27240585  |
| C    | 1.11965626 | 0.00000000  | 2.54616987  | H    | 1.95575344  | -5.33791637 | 4.46600952  |
| N    | 2.02793843 | -1.12522156 | 2.21269764  | H    | 3.13032250  | -6.59194527 | 6.24640118  |
| C    | 2.70707254 | -1.94795170 | 3.21932031  | H    | 4.23564122  | -5.37153733 | 8.11210525  |
| C    | 3.45983553 | -2.93044676 | 2.30345226  | H    | 4.14764020  | -2.88559838 | 8.17752994  |
| H    | 4.48626919 | -2.60188723 | 2.10389502  | H    | 2.97125339  | -1.63637878 | 6.39617534  |
| H    | 3.47681020 | -3.95429622 | 2.68131314  | C    | 1.61310163  | 0.90129786  | 3.45289671  |
| O    | 2.72788360 | -2.91255980 | 1.06344721  | H    | 2.60852731  | 0.74837980  | 3.86189622  |
| C    | 1.97963185 | -1.77171667 | 1.01727398  | C    | 0.77581201  | 2.01086755  | 4.02129066  |
| O    | 1.39955032 | -1.44676067 | -0.01415889 | H    | -0.14801327 | 2.11786096  | 3.44475206  |
| H    | 3.41411216 | -1.34430218 | 3.79511413  | H    | 0.49155241  | 1.83383609  | 5.07111722  |
| C    | 1.70746433 | -2.62063874 | 4.18975503  | H    | 1.29864221  | 2.97917064  | 4.00659070  |
| H    | 1.08461540 | -1.82426557 | 4.61223667  | O    | -2.09160435 | -0.02932085 | -0.11031578 |
| H    | 1.04633240 | -3.27757909 | 3.61153517  | C    | -2.79882247 | -0.73068698 | 0.94611718  |
| C    | 2.39276726 | -3.39653988 | 5.29246188  | C    | -3.80136196 | 0.27273529  | 1.53850954  |
| C    | 3.01553321 | -2.72285291 | 6.35454510  | C    | -3.18568013 | 1.62804820  | 1.15500125  |
| C    | 3.67584937 | -3.42651231 | 7.36120722  | C    | -2.59297113 | 1.31853024  | -0.21712196 |
| C    | 3.72431046 | -4.82224654 | 7.32615499  | H    | -1.75640429 | 1.96217419  | -0.49941282 |

|   |             |             |             |
|---|-------------|-------------|-------------|
| H | -3.35860681 | 1.36245961  | -1.00648191 |
| H | -2.38274477 | 1.89022328  | 1.85123974  |
| H | -3.91503543 | 2.44403322  | 1.12848168  |
| H | -3.91840003 | 0.14611286  | 2.61882083  |
| H | -4.78932811 | 0.15809038  | 1.07607709  |
| H | -3.28698579 | -1.61088929 | 0.51153568  |
| H | -2.04880253 | -1.04259060 | 1.67608343  |
| O | 0.94960517  | 1.84733917  | 0.03534704  |
| C | 2.00280123  | 2.15877624  | 0.57591087  |
| C | 2.29589684  | 3.56434729  | 1.07213089  |
| H | 1.50376352  | 3.79918389  | 1.79655547  |
| C | 2.17655163  | 4.56272624  | -0.09721176 |
| H | 2.30338396  | 5.58903825  | 0.26476095  |
| H | 2.94759068  | 4.37722730  | -0.85534372 |
| H | 1.19769447  | 4.48090907  | -0.57814154 |
| C | 3.65912103  | 3.63861859  | 1.76720535  |
| H | 4.47322460  | 3.42132175  | 1.06356336  |
| H | 3.83486474  | 4.63920235  | 2.17635256  |
| H | 3.71824970  | 2.91646085  | 2.58835531  |
| H | 2.82040620  | 1.41809469  | 0.66065339  |
| O | -0.03395421 | 0.03220315  | -2.18705180 |
| C | 1.24278942  | 0.06653460  | -2.84094499 |
| C | 1.52491792  | -1.37550604 | -3.32411744 |
| C | 0.15508747  | -2.08942181 | -3.18047001 |
| C | -0.81422410 | -0.93369955 | -2.90222574 |
| H | -1.66732292 | -1.18553961 | -2.27153543 |
| H | -1.17965129 | -0.48620133 | -3.84110148 |
| H | 0.17606987  | -2.77194712 | -2.32654685 |
| H | -0.12557707 | -2.66050694 | -4.07127386 |
| H | 2.27828862  | -1.85836974 | -2.69835806 |
| H | 1.88525259  | -1.37861781 | -4.35810275 |
| H | 1.19238373  | 0.76761800  | -3.68771689 |
| H | 1.96577640  | 0.44115334  | -2.11565395 |

**Table 38.** Geometric coordinates and thermally corrected MP2 energies for IRC derived products leading to (*R,S*)-**6** from **5** monomer with three THF

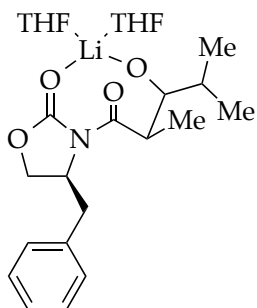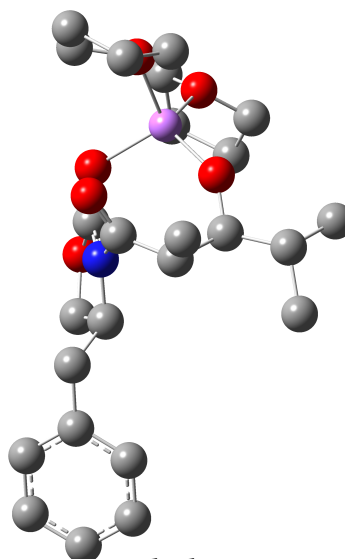

$G = -1488.706172$  Hartree

$G_{\text{MP2}} = -931180.4326$  kcal/mol

$\Delta G_{\text{MP2}} = -2.551572784$  kcal/mol Li vs. **5** monomer with three THF

$\Delta G_{\text{MP2}} = -9.083258675$  kcal/mol Li vs. **5** monomer (*R,S*)-**6** transition state

| Atom | X          | Y           | Z          | Atom | X           | Y           | Z           |
|------|------------|-------------|------------|------|-------------|-------------|-------------|
| Li   | 0.00000000 | 0.00000000  | 0.00000000 | C    | 2.05778743  | 1.22570675  | 2.76694081  |
| O    | 0.00000000 | 0.00000000  | 3.07164130 | H    | 3.01026645  | 1.04680905  | 3.28185620  |
| C    | 1.19140990 | 0.00000000  | 2.85139587 | C    | 1.34179093  | 2.42880033  | 3.38392549  |
| N    | 1.82686287 | -1.25777009 | 2.51834637 | H    | 0.50625545  | 2.73041041  | 2.74718691  |
| C    | 3.18419450 | -1.67430876 | 2.89648277 | H    | 0.94132552  | 2.19326375  | 4.37577081  |
| C    | 3.21158930 | -3.08893875 | 2.27842095 | H    | 2.02444899  | 3.27757857  | 3.48589612  |
| H    | 4.15028477 | -3.32537538 | 1.77665993 | O    | -1.90118902 | 0.52353298  | 0.25810530  |
| H    | 2.99527422 | -3.86196118 | 3.02397284 | C    | -2.78977987 | -0.24173909 | 1.10850178  |
| O    | 2.15851470 | -3.09907552 | 1.29629057 | C    | -3.61069903 | 0.78572135  | 1.89727718  |
| C    | 1.32197259 | -2.05152605 | 1.51195603 | C    | -2.66290515 | 1.99498631  | 1.94361452  |
| O    | 0.32182583 | -1.87961886 | 0.83960007 | C    | -2.00936592 | 1.93568794  | 0.56423734  |
| H    | 3.92443999 | -1.02865355 | 2.40766353 | H    | -0.99693707 | 2.34643095  | 0.52866437  |
| C    | 3.42174456 | -1.67730572 | 4.41830839 | H    | -2.63413171 | 2.41537108  | -0.20256203 |
| H    | 3.27767605 | -0.65968854 | 4.79999494 | H    | -1.90406608 | 1.84861387  | 2.71816866  |
| H    | 2.65474906 | -2.30424935 | 4.88793701 | H    | -3.17975404 | 2.94294242  | 2.12463937  |
| C    | 4.80775061 | -2.17391243 | 4.77934478 | H    | -3.88837058 | 0.41681036  | 2.88932259  |
| C    | 5.93581330 | -1.37524007 | 4.53796383 | H    | -4.53197751 | 1.04071353  | 1.35922686  |
| C    | 7.21618248 | -1.83542969 | 4.84371859 | H    | -3.40439140 | -0.88750216 | 0.47189197  |
| C    | 7.39094973 | -3.10477982 | 5.39988332 | H    | -2.17468592 | -0.86411786 | 1.76560677  |
| C    | 6.27734867 | -3.90679791 | 5.65001992 | O    | 1.23119509  | 1.23836923  | 0.45892659  |
| C    | 4.99672044 | -3.44328267 | 5.34113171 | C    | 2.36073084  | 1.38355707  | 1.18693362  |
| H    | 4.13278462 | -4.07021154 | 5.55084914 | C    | 3.12016284  | 2.71742548  | 0.90586889  |
| H    | 6.40223760 | -4.89263286 | 6.08995314 | H    | 2.45859342  | 3.54098039  | 1.20816968  |
| H    | 8.38793980 | -3.46274765 | 5.64157951 | C    | 3.36410661  | 2.85875775  | -0.60198852 |
| H    | 8.07718270 | -1.20035397 | 4.65325866 | H    | 3.84978913  | 3.81451840  | -0.83693306 |
| H    | 5.80994584 | -0.38018561 | 4.11608403 | H    | 4.01841480  | 2.05552154  | -0.97076093 |

|   |             |             |             |
|---|-------------|-------------|-------------|
| H | 2.41651725  | 2.80211771  | -1.14216045 |
| C | 4.44372292  | 2.83614936  | 1.67622905  |
| H | 5.10281058  | 1.98432231  | 1.45524208  |
| H | 4.98576847  | 3.74587559  | 1.39004975  |
| H | 4.29963443  | 2.87414190  | 2.76249180  |
| H | 3.11630686  | 0.57846741  | 0.97873233  |
| O | 0.15475630  | -0.56183666 | -1.93304428 |
| C | 1.36543087  | -0.17601407 | -2.60266281 |
| C | 2.21162350  | -1.46061731 | -2.68194432 |
| C | 1.16934647  | -2.60780797 | -2.55722436 |
| C | -0.17554648 | -1.86986327 | -2.41496683 |
| H | -0.85555915 | -2.32404325 | -1.69202688 |
| H | -0.68836260 | -1.77809700 | -3.38425824 |
| H | 1.36702738  | -3.21097626 | -1.66756787 |
| H | 1.17154309  | -3.27385133 | -3.42579161 |
| H | 2.92640935  | -1.50041773 | -1.85451159 |
| H | 2.78197345  | -1.50882709 | -3.61483458 |
| H | 1.11603842  | 0.19986156  | -3.60636497 |
| H | 1.80619535  | 0.62347572  | -2.00624698 |

**Table 39.** Geometric coordinates and thermally corrected MP2 energies for IRC derived reactants leading to (*S,R*)-6 from 5 monomer with three THF

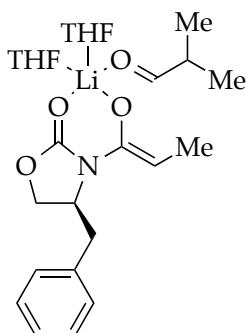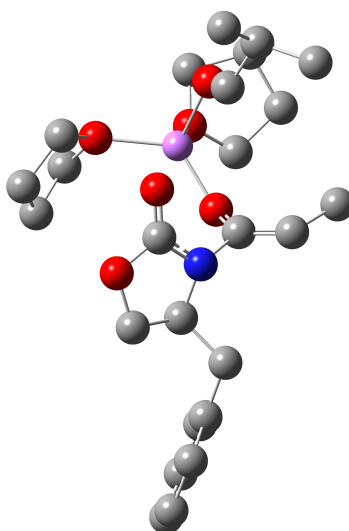

G = -1488.710578 Hartree

G<sub>MP2</sub> = -931174.003 kcal/mol

ΔG<sub>MP2</sub> = 3.877975016 kcal/mol Li vs. 5 monomer with three THF

ΔG<sub>MP2</sub> = -5.700287545 kcal/mol Li vs. 5 monomer (*S,R*)-6 transition state

| Atom | X           | Y           | Z           | Atom | X           | Y           | Z           |
|------|-------------|-------------|-------------|------|-------------|-------------|-------------|
| Li   | 0.00000000  | 0.00000000  | 0.00000000  | H    | -0.31423857 | -2.32516828 | -3.38313541 |
| O    | 0.00000000  | 0.00000000  | -1.82773040 | C    | 1.46386462  | 1.02751223  | -3.43098980 |
| C    | 0.94572960  | 0.00000000  | -2.71141391 | H    | 2.25987159  | 0.80386101  | -4.13481910 |
| N    | 1.50520793  | -1.33684513 | -3.01778527 | C    | 0.98173510  | 2.44533988  | -3.31870984 |
| C    | 0.70023544  | -2.27654550 | -3.80748597 | H    | 0.19311371  | 2.52064292  | -2.56298907 |
| C    | 1.45982641  | -3.58437888 | -3.53548307 | H    | 0.56907349  | 2.82132402  | -4.26775767 |
| H    | 2.22140312  | -3.77496927 | -4.30222099 | H    | 1.78579582  | 3.14314978  | -3.03746158 |
| H    | 0.81584968  | -4.46077848 | -3.44382534 | O    | -1.74225097 | 0.87289286  | 0.51765191  |
| O    | 2.12198638  | -3.36651193 | -2.27652905 | C    | -2.39931790 | 1.64765015  | -0.50424303 |
| C    | 2.17438431  | -2.01407606 | -2.03751283 | C    | -2.12934700 | 3.12399652  | -0.14383204 |
| O    | 2.75760191  | -1.56523132 | -1.06520238 | C    | -1.68479620 | 3.07897910  | 1.34507851  |
| C    | 0.60604076  | -1.88821777 | -5.29059001 | C    | -1.88614080 | 1.60824489  | 1.73967238  |
| H    | 0.22727756  | -0.86062576 | -5.33777573 | H    | -1.14384610 | 1.22526367  | 2.44304460  |
| H    | 1.61831907  | -1.87087659 | -5.71274346 | H    | -2.89290215 | 1.43572048  | 2.15026286  |
| C    | -0.28321517 | -2.82314655 | -6.08309581 | H    | -0.62904282 | 3.34760072  | 1.43913702  |
| C    | 0.26025179  | -3.80777582 | -6.91908472 | H    | -2.26389114 | 3.75473827  | 1.98198199  |
| C    | -0.56360206 | -4.68588558 | -7.62639791 | H    | -1.33694625 | 3.53958103  | -0.77250571 |
| C    | -1.95067505 | -4.59344738 | -7.50784293 | H    | -3.02416689 | 3.73653191  | -0.29145185 |
| C    | -2.50679493 | -3.61505822 | -6.68038547 | H    | -3.47557719 | 1.42259515  | -0.47995608 |
| C    | -1.67995377 | -2.73941508 | -5.97704133 | H    | -1.97163364 | 1.32486836  | -1.45421085 |
| H    | -2.12093123 | -1.97369061 | -5.34218575 | O    | 1.40620074  | 1.20244407  | 0.79530299  |
| H    | -3.58652157 | -3.52981552 | -6.58731325 | C    | 2.52044705  | 1.29023230  | 0.28978964  |
| H    | -2.59390723 | -5.27389669 | -8.05949986 | C    | 3.56346217  | 2.28063668  | 0.74122796  |
| H    | -0.12030592 | -5.43890706 | -8.27304386 | H    | 3.12178337  | 2.88806953  | 1.54028591  |
| H    | 1.34067003  | -3.88109763 | -7.02432780 | C    | 4.77984852  | 1.50615873  | 1.28878876  |



|   |             |             |             |
|---|-------------|-------------|-------------|
| H | 5.56507988  | 2.20748995  | 1.59203294  |
| H | 5.19800954  | 0.83815952  | 0.52683803  |
| H | 4.50977556  | 0.89969965  | 2.16005668  |
| C | 3.95990589  | 3.18085067  | -0.44510236 |
| H | 4.34664894  | 2.58474764  | -1.27977273 |
| H | 4.74304993  | 3.88313587  | -0.13847465 |
| H | 3.10628835  | 3.76020207  | -0.81269580 |
| H | 2.80160594  | 0.60811995  | -0.53023827 |
| O | -0.14538950 | -1.61914757 | 1.18380807  |
| C | 0.93224129  | -2.53301749 | 1.49234359  |
| C | 0.51110932  | -3.91201572 | 0.92726647  |
| C | -0.92616591 | -3.68037292 | 0.39965987  |
| C | -1.34934964 | -2.39742304 | 1.11534293  |
| H | -2.09460907 | -1.79722311 | 0.59034205  |
| H | -1.71036093 | -2.60610802 | 2.13482576  |
| H | -0.91404703 | -3.50946438 | -0.68175361 |
| H | -1.59898050 | -4.51882322 | 0.60530831  |
| H | 1.18323839  | -4.23315795 | 0.12831749  |
| H | 0.52853396  | -4.67399725 | 1.71327044  |
| H | 1.06238397  | -2.56577044 | 2.58246214  |
| H | 1.83304521  | -2.13729638 | 1.02350167  |

**Table 40.** Geometric coordinates and thermally corrected MP2 energies for IRC derived products leading to (*S,R*)-6 from 5 monomer with three THF

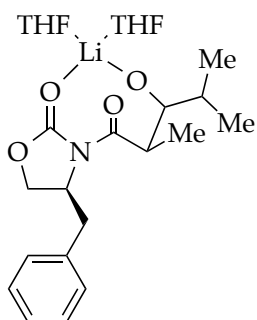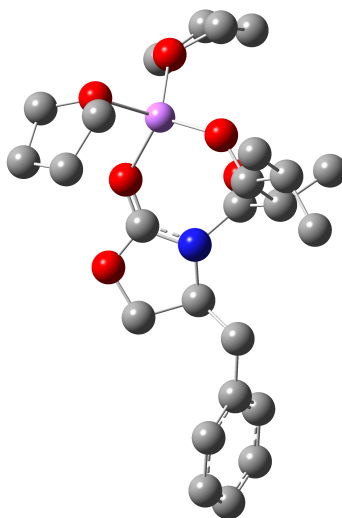

G = -1488.701899 Hartree

G<sub>MP2</sub> = -931176.7029 kcal/mol

ΔG<sub>MP2</sub> = 1.178118224 kcal/mol Li vs. 5 monomer with three THF

ΔG<sub>MP2</sub> = -8.400144337 kcal/mol Li vs. 5 monomer (*S,R*)-6 transition state

| Atom | X          | Y           | Z           | Atom | X           | Y           | Z           |
|------|------------|-------------|-------------|------|-------------|-------------|-------------|
| Li   | 0.00000000 | 0.00000000  | 0.00000000  | H    | 3.00561674  | 0.99532081  | -3.26707343 |
| O    | 0.00000000 | 0.00000000  | -3.28022010 | C    | 1.37592035  | 2.43577348  | -3.40576019 |
| C    | 1.16475918 | 0.00000000  | -2.95165513 | H    | 0.51981917  | 2.73521444  | -2.79544128 |
| N    | 1.78861946 | -1.29586321 | -2.60654334 | H    | 1.01562258  | 2.23999890  | -4.42149864 |
| C    | 2.45612189 | -2.11698047 | -3.63570719 | H    | 2.07953999  | 3.27225588  | -3.44936273 |
| C    | 2.59310576 | -3.44111563 | -2.86397239 | O    | -1.91155639 | 0.48942006  | -0.29578276 |
| H    | 3.56126484 | -3.51285469 | -2.35529873 | C    | -2.78635017 | -0.28241741 | -1.15180453 |
| H    | 2.44286261 | -4.32477673 | -3.48462501 | C    | -3.63746143 | 0.73697873  | -1.91722764 |
| O    | 1.55771032 | -3.39936720 | -1.86577506 | C    | -2.71143960 | 1.96321651  | -1.96277182 |
| C    | 1.14490290 | -2.11600796 | -1.70727302 | C    | -2.04224632 | 1.90314411  | -0.59066844 |
| O    | 0.33946806 | -1.80730337 | -0.84598911 | H    | -1.03520552 | 2.32723099  | -0.56222279 |
| C    | 3.79618245 | -1.56147888 | -4.14610845 | H    | -2.66722620 | 2.36685951  | 0.18558504  |
| H    | 3.61355923 | -0.60909924 | -4.65627498 | H    | -1.95970354 | 1.83908053  | -2.74884345 |
| H    | 4.43649209 | -1.34512026 | -3.28334338 | H    | -3.24658776 | 2.90358668  | -2.12941825 |
| C    | 4.48390118 | -2.52475891 | -5.09438781 | H    | -3.92377194 | 0.37370328  | -2.90897446 |
| C    | 5.59021188 | -3.27842991 | -4.68095005 | H    | -4.55456261 | 0.96978206  | -1.36230638 |
| C    | 6.20497553 | -4.18362242 | -5.54841330 | H    | -3.37933863 | -0.95533389 | -0.52282408 |
| C    | 5.72022923 | -4.34894292 | -6.84608292 | H    | -2.16357090 | -0.87964308 | -1.82592693 |
| C    | 4.62096511 | -3.60022103 | -7.27253583 | O    | 1.14837431  | 1.28787995  | -0.51233998 |
| C    | 4.01064756 | -2.69577229 | -6.40397250 | C    | 2.30937069  | 1.33449848  | -1.20247342 |
| H    | 3.16269367 | -2.10797054 | -6.74965330 | C    | 3.15916165  | 2.60941344  | -0.90446950 |
| H    | 4.24222669 | -3.71573402 | -8.28456112 | H    | 2.56090261  | 3.47996154  | -1.20718601 |
| H    | 6.19893209 | -5.05086824 | -7.52333097 | C    | 3.38926289  | 2.72080665  | 0.60834649  |
| H    | 7.06550658 | -4.75467657 | -5.21022806 | H    | 3.94320647  | 3.63442746  | 0.85934635  |
| H    | 5.98239883 | -3.14631024 | -3.67498838 | H    | 3.97347412  | 1.86649934  | 0.98014032  |
| H    | 1.77246729 | -2.24745560 | -4.48796372 | H    | 2.43105072  | 2.73402141  | 1.13265986  |
| C    | 2.03825479 | 1.20152310  | -2.79246959 | C    | 4.49927472  | 2.64097061  | -1.65428517 |

|   |             |             |             |
|---|-------------|-------------|-------------|
| H | 5.08488616  | 1.73416394  | -1.44721460 |
| H | 5.10720172  | 3.49812786  | -1.33919650 |
| H | 4.37476104  | 2.71604132  | -2.74106949 |
| H | 2.98742328  | 0.47128202  | -0.98178298 |
| O | 0.12894207  | -0.57018372 | 1.94125894  |
| C | 1.35124309  | -0.21579931 | 2.60558810  |
| C | 2.21557393  | -1.48294423 | 2.53099894  |
| C | 1.17536885  | -2.63632794 | 2.48975583  |
| C | -0.18076184 | -1.90891153 | 2.35435767  |
| H | -0.83879402 | -2.33935386 | 1.59773227  |
| H | -0.71312602 | -1.87248584 | 3.31595200  |
| H | 1.35165380  | -3.29149082 | 1.63285213  |
| H | 1.20376664  | -3.25185832 | 3.39446785  |
| H | 2.81222499  | -1.47168592 | 1.61378289  |
| H | 2.90435952  | -1.56148592 | 3.37790058  |
| H | 1.13007901  | 0.05924169  | 3.64834966  |
| H | 1.76045117  | 0.64469480  | 2.07548830  |

**Table 41.** Geometric coordinates and thermally corrected MP2 energies for IRC derived reactants leading to (*R,R*)-6 from 5 monomer with three THF

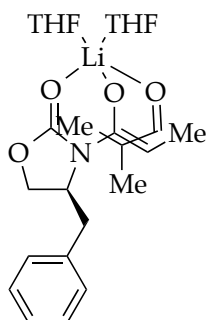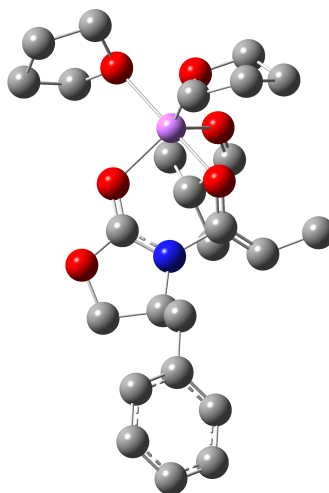

G = -1488.706809 Hartree

G<sub>MP2</sub> = -931173.8147 kcal/mol

ΔG<sub>MP2</sub> = 4.066321104 kcal/mol Li vs. 5 monomer with three THF

ΔG<sub>MP2</sub> = -3.335285556 kcal/mol Li vs. 5 monomer (*R,R*)-6 transition state

| Atom | X          | Y           | Z          | Atom | X           | Y           | Z           |
|------|------------|-------------|------------|------|-------------|-------------|-------------|
| Li   | 0.00000000 | 0.00000000  | 0.00000000 | H    | 2.55424912  | 0.72424636  | 3.94280329  |
| O    | 0.00000000 | 0.00000000  | 1.93822720 | C    | 0.74299448  | 2.02720952  | 4.02378575  |
| C    | 1.10541915 | 0.00000000  | 2.57427812 | H    | -0.13510869 | 2.17569186  | 3.38800096  |
| N    | 2.01401928 | -1.13423316 | 2.26177287 | H    | 0.38190679  | 1.85437311  | 5.05088350  |
| C    | 2.62400349 | -1.99214830 | 3.28218749 | H    | 1.30385802  | 2.97272269  | 4.05021105  |
| C    | 3.39647542 | -2.97434680 | 2.38267567 | O    | -2.11347432 | -0.08924079 | -0.00794979 |
| H    | 4.43742126 | -2.66471201 | 2.23487781 | C    | -2.64725059 | -1.13964546 | 0.83658460  |
| H    | 3.37484610 | -4.00499943 | 2.74130994 | C    | -3.76441236 | -0.49264110 | 1.66001407  |
| O    | 2.72050417 | -2.91793708 | 1.11160659 | C    | -3.26678878 | 0.95550744  | 1.78279486  |
| C    | 1.99960647 | -1.75925713 | 1.05700708 | C    | -2.64606277 | 1.19247640  | 0.40677670  |
| O    | 1.46662583 | -1.40364226 | 0.00835504 | H    | -1.82335884 | 1.91139682  | 0.41562816  |
| H    | 3.31504056 | -1.41675948 | 3.90461739 | H    | -3.39710426 | 1.51258894  | -0.32958336 |
| C    | 1.56195701 | -2.65984521 | 4.18819290 | H    | -2.48873004 | 1.02180176  | 2.54869652  |
| H    | 0.93647840 | -1.85704092 | 4.59420356 | H    | -4.06257574 | 1.67080626  | 2.01412512  |
| H    | 0.91680463 | -3.29058959 | 3.56444773 | H    | -3.90223140 | -0.98540735 | 2.62733173  |
| C    | 2.17347450 | -3.47124164 | 5.30849674 | H    | -4.71858342 | -0.52940019 | 1.11956403  |
| C    | 2.74637170 | -2.83127766 | 6.41842969 | H    | -2.99625452 | -1.95167096 | 0.18923673  |
| C    | 3.34163790 | -3.56741875 | 7.44229323 | H    | -1.83536301 | -1.49671709 | 1.47727812  |
| C    | 3.37362923 | -4.96252254 | 7.37663335 | O    | 0.78939080  | 1.93355542  | 0.09607463  |
| C    | 2.80326498 | -5.61274774 | 6.28208456 | C    | 1.81816572  | 2.44153912  | 0.51158984  |
| C    | 2.20943107 | -4.87132639 | 5.25825086 | C    | 3.21252573  | 1.97069449  | 0.15034001  |
| H    | 1.75633004 | -5.38665365 | 4.41378010 | H    | 3.15614623  | 0.88645757  | 0.00035136  |
| H    | 2.81541635 | -6.69814426 | 6.22487888 | C    | 3.59319578  | 2.63332116  | -1.19402371 |
| H    | 3.83431097 | -5.53719724 | 8.17565079 | H    | 3.61059401  | 3.72703989  | -1.10686018 |
| H    | 3.77544283 | -3.05226128 | 8.29550752 | H    | 4.59359403  | 2.30877328  | -1.50187531 |
| H    | 2.71432888 | -1.74550958 | 6.48308670 | H    | 2.88308085  | 2.36432627  | -1.98219779 |
| C    | 1.57566423 | 0.89042673  | 3.49950275 | C    | 4.23029472  | 2.30324555  | 1.24764014  |

|   |             |             |             |
|---|-------------|-------------|-------------|
| H | 3.95495127  | 1.82179008  | 2.19036638  |
| H | 5.23143032  | 1.96523206  | 0.95751822  |
| H | 4.28411608  | 3.38595233  | 1.42041965  |
| H | 1.76243824  | 3.36788421  | 1.12004543  |
| O | -0.03152973 | -0.03191927 | -2.18215582 |
| C | 1.17329247  | -0.36540902 | -2.88227669 |
| C | 0.96416926  | -1.80039263 | -3.40594612 |
| C | -0.58137825 | -1.96457790 | -3.41998003 |
| C | -1.09397417 | -0.58577063 | -2.96763622 |
| H | -1.98013260 | -0.60858461 | -2.33399818 |
| H | -1.28211158 | 0.06803776  | -3.83428424 |
| H | -0.89043958 | -2.73897076 | -2.71130512 |
| H | -0.97120776 | -2.23961987 | -4.40521622 |
| H | 1.42321356  | -2.51972150 | -2.72379689 |
| H | 1.40998349  | -1.93578531 | -4.39647660 |
| H | 1.31638557  | 0.34574836  | -3.71121919 |
| H | 1.99858408  | -0.27327911 | -2.17679919 |

**Table 42.** Geometric coordinates and thermally corrected MP2 energies for IRC derived products leading to (*R,R*)-**6** from **5** monomer with three THF

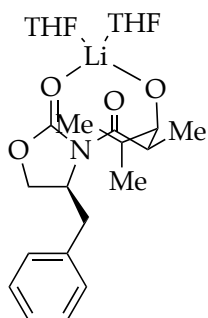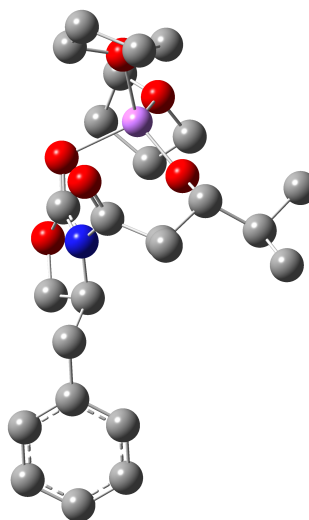

G = -1488.704554 Hartree

G<sub>MP2</sub> = -931179.4901 kcal/mol

ΔG<sub>MP2</sub> = -1.609076654 kcal/mol Li vs. **5** monomer with three THF

ΔG<sub>MP2</sub> = -9.010683315 kcal/mol Li vs. **5** monomer (*R,R*)-**6** transition state

| Atom | X          | Y           | Z          | Atom | X           | Y           | Z           |
|------|------------|-------------|------------|------|-------------|-------------|-------------|
| Li   | 0.00000000 | 0.00000000  | 0.00000000 | C    | 1.66745213  | 2.11891971  | 4.08741039  |
| O    | 0.00000000 | 0.00000000  | 3.12084270 | H    | 0.59300832  | 2.32194606  | 4.07484048  |
| C    | 1.18272987 | 0.00000000  | 2.85120697 | H    | 1.90056244  | 1.62702118  | 5.04075697  |
| N    | 1.80125526 | -1.23921260 | 2.45640965 | H    | 2.19666935  | 3.07370067  | 4.06479412  |
| C    | 3.21234587 | -1.60147435 | 2.65631032 | O    | -1.89612145 | 0.54468016  | 0.21383455  |
| C    | 3.21832834 | -3.00695725 | 2.02571448 | C    | -2.75481284 | -0.15409594 | 1.15464733  |
| H    | 4.11589544 | -3.21968568 | 1.44480595 | C    | -3.52434883 | 0.93330318  | 1.91565362  |
| H    | 3.07938743 | -3.79082845 | 2.77870585 | C    | -2.57806232 | 2.14020609  | 1.81423187  |
| O    | 2.08759031 | -3.02354900 | 1.13678174 | C    | -2.01303193 | 1.97278317  | 0.40555891  |
| C    | 1.23562516 | -2.01735637 | 1.46563836 | H    | -1.01736474 | 2.40310421  | 0.26833572  |
| O    | 0.17526016 | -1.86859247 | 0.88882551 | H    | -2.69220022 | 2.38188163  | -0.35608509 |
| H    | 3.85693065 | -0.92600049 | 2.08002652 | H    | -1.77297180 | 2.04873256  | 2.54995294  |
| C    | 3.64179977 | -1.60744362 | 4.13533347 | H    | -3.08273931 | 3.10124727  | 1.95505790  |
| H    | 3.53021716 | -0.59620810 | 4.54290526 | H    | -3.73584108 | 0.63951012  | 2.94797934  |
| H    | 2.95070007 | -2.25191257 | 4.69116064 | H    | -4.47902150 | 1.15258452  | 1.42201968  |
| C    | 5.07026452 | -2.08241537 | 4.31538678 | H    | -3.40759855 | -0.82683612 | 0.58815445  |
| C    | 6.14715613 | -1.25603011 | 3.96040173 | H    | -2.11232771 | -0.74216294 | 1.81473619  |
| C    | 7.46264833 | -1.69848620 | 4.09606082 | O    | 1.40617596  | 0.96361477  | 0.55329947  |
| C    | 7.72493160 | -2.97735557 | 4.59285027 | C    | 1.79901399  | 1.91295682  | 1.45702201  |
| C    | 6.66360485 | -3.80680126 | 4.95563657 | C    | 3.05213312  | 2.68481818  | 0.94022135  |
| C    | 5.34764687 | -3.36088231 | 4.81694405 | H    | 3.79999413  | 1.90713828  | 0.71589200  |
| H    | 4.52614388 | -4.00970187 | 5.11291329 | C    | 2.69901029  | 3.39265523  | -0.37588104 |
| H    | 6.85743646 | -4.80018618 | 5.35140216 | H    | 1.99886637  | 4.22034661  | -0.19317941 |
| H    | 8.74981853 | -3.32129801 | 4.70186455 | H    | 3.59123207  | 3.81662009  | -0.85415274 |
| H    | 8.28346746 | -1.04233919 | 3.81915436 | H    | 2.22227025  | 2.69480573  | -1.06790768 |
| H    | 5.95405150 | -0.25391861 | 3.58314065 | C    | 3.67975185  | 3.68830552  | 1.91962298  |
| C    | 2.05095605 | 1.24501997  | 2.88555071 | H    | 4.07429976  | 3.20940414  | 2.82314595  |
| H    | 3.10895166 | 0.96658544  | 2.94641365 | H    | 4.51515848  | 4.21715824  | 1.44344002  |

|   |             |             |             |
|---|-------------|-------------|-------------|
| H | 2.95248020  | 4.44921661  | 2.23244083  |
| H | 1.00827652  | 2.68052636  | 1.64603295  |
| O | 0.25954274  | -0.47478045 | -1.93088976 |
| C | 1.62775329  | -0.38006868 | -2.36939241 |
| C | 2.13763215  | -1.83473251 | -2.44788168 |
| C | 0.84252152  | -2.69340215 | -2.48442768 |
| C | -0.28302822 | -1.64864713 | -2.54684760 |
| H | -1.18338834 | -1.92450189 | -1.99348085 |
| H | -0.56029212 | -1.41578895 | -3.58637229 |
| H | 0.75441878  | -3.28253985 | -1.56862035 |
| H | 0.81013059  | -3.37750392 | -3.33822542 |
| H | 2.73414122  | -2.08689667 | -1.56669169 |
| H | 2.76599910  | -1.98768479 | -3.33102005 |
| H | 1.65096023  | 0.10444235  | -3.35655883 |
| H | 2.13819607  | 0.24479374  | -1.63461603 |

**Table 43.** Geometric coordinates and thermally corrected MP2 energies for IRC derived reactants leading to (*S,S*)-**6** from **5** monomer with three THF

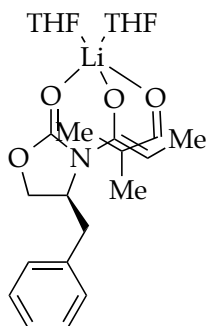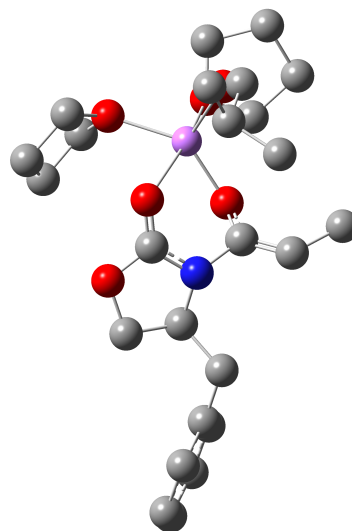

$G = -1488.707506$  Hartree

$G_{\text{MP2}} = -931173.1143$  kcal/mol

$\Delta G_{\text{MP2}} = 4.766672814$  kcal/mol Li vs. **5** monomer with three THF

$\Delta G_{\text{MP2}} = -4.790804939$  kcal/mol Li vs. **5** monomer (*S,S*)-**6** transition state

| Atom | X          | Y           | Z           | Atom | X           | Y           | Z           |
|------|------------|-------------|-------------|------|-------------|-------------|-------------|
| Li   | 0.00000000 | 0.00000000  | 0.00000000  | H    | 8.55080771  | 0.81697420  | -2.27832127 |
| O    | 0.00000000 | 0.00000000  | -2.50027400 | H    | 9.21600903  | 0.99018867  | -4.67033737 |
| C    | 1.16825151 | 0.00000000  | -2.86199160 | H    | 7.71882556  | 0.06921811  | -6.43157101 |
| N    | 2.16909691 | -0.84612132 | -2.48620158 | H    | 5.57993544  | -1.00437385 | -5.80641911 |
| C    | 2.03061901 | -1.54956058 | -1.18403321 | H    | 3.86718186  | 0.32330888  | -2.06232570 |
| O    | 1.66717839 | -0.79680308 | -0.20217354 | O    | 0.21315426  | 0.40455097  | 2.06367028  |
| C    | 2.33658380 | -2.87460679 | -1.19677915 | C    | 1.23574750  | -0.28216443 | 2.80524353  |
| H    | 2.59579231 | -3.33393548 | -2.14605969 | C    | 0.49652644  | -1.35903837 | 3.62687105  |
| C    | 2.34435310 | -3.72628337 | 0.04152697  | C    | -0.97986471 | -0.87278139 | 3.64435523  |
| H    | 2.01101877 | -3.14064250 | 0.90404452  | C    | -0.91961431 | 0.48872333  | 2.93258680  |
| H    | 3.34551615 | -4.12163476 | 0.27431510  | H    | -1.79087232 | 0.71517512  | 2.31546197  |
| H    | 1.68150346 | -4.60072419 | -0.04585305 | H    | -0.76777237 | 1.30838688  | 3.65303721  |
| C    | 3.46443954 | -0.27764226 | -2.89243690 | H    | -1.61511829 | -1.55872260 | 3.07791864  |
| C    | 3.01177315 | 0.63801627  | -4.04065957 | H    | -1.38827396 | -0.78748837 | 4.65636346  |
| H    | 3.05848347 | 0.12231303  | -5.00800127 | H    | 0.57654384  | -2.33753854 | 3.14464468  |
| H    | 3.56533125 | 1.57595190  | -4.10481154 | H    | 0.91718064  | -1.45084264 | 4.63330175  |
| O    | 1.63440933 | 0.93678020  | -3.74700831 | H    | 1.74115105  | 0.43959803  | 3.46542263  |
| C    | 4.51075622 | -1.32475622 | -3.30032661 | H    | 1.93766848  | -0.67107775 | 2.06812003  |
| H    | 4.64082201 | -2.00707178 | -2.45327530 | O    | -1.59930379 | -1.29526677 | 0.21704712  |
| H    | 4.10894430 | -1.91855967 | -4.13051132 | C    | -2.15793651 | -2.20267372 | -0.37653910 |
| C    | 5.83370921 | -0.69712441 | -3.68878305 | H    | -2.77924606 | -2.91813404 | 0.20692561  |
| C    | 6.22462744 | -0.59660575 | -5.03065269 | C    | -2.09938510 | -2.47549139 | -1.85482080 |
| C    | 7.43347428 | 0.00656502  | -5.38453379 | H    | -1.53821929 | -1.66186737 | -2.32220605 |
| C    | 8.27382371 | 0.52230801  | -4.39758116 | C    | -3.53473108 | -2.53659442 | -2.41179800 |
| C    | 7.89903100 | 0.42591813  | -3.05541394 | H    | -4.12381420 | -3.32256193 | -1.92170798 |
| C    | 6.69189185 | -0.17910422 | -2.70662666 | H    | -3.50669255 | -2.76162976 | -3.48318391 |
| H    | 6.41321489 | -0.25996708 | -1.65807677 | H    | -4.06203552 | -1.58468149 | -2.28181649 |



|   |             |             |             |
|---|-------------|-------------|-------------|
| C | -1.34595005 | -3.80410778 | -2.07894821 |
| H | -0.29607187 | -3.70816977 | -1.78298646 |
| H | -1.37900222 | -4.06731135 | -3.14217322 |
| H | -1.80351408 | -4.62938548 | -1.51757875 |
| O | -0.78102546 | 1.90275411  | -0.20796325 |
| C | -1.58836065 | 2.34877006  | -1.31359678 |
| C | -0.70739820 | 3.31913254  | -2.13398654 |
| C | 0.52633518  | 3.56314520  | -1.22653865 |
| C | 0.08560507  | 2.99694216  | 0.12660166  |
| H | 0.88911139  | 2.59663710  | 0.74633472  |
| H | -0.47695805 | 3.74337514  | 0.70974642  |
| H | 1.38539900  | 3.00089486  | -1.60426594 |
| H | 0.81044788  | 4.61826814  | -1.16271244 |
| H | -0.40713640 | 2.86864501  | -3.08216975 |
| H | -1.24560577 | 4.24792575  | -2.34944676 |
| H | -2.48001076 | 2.85470999  | -0.91579891 |
| H | -1.88635101 | 1.46160791  | -1.87064723 |

**Table 44.** Geometric coordinates and thermally corrected MP2 energies for IRC derived products leading to (*S,S*)-**6** from **5** monomer with three THF

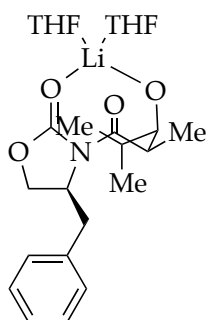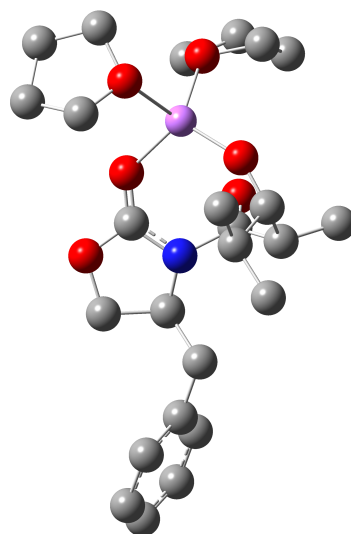

G = -1488.697621 Hartree

$G_{\text{MP2}} = -931174.44$  kcal/mol

$\Delta G_{\text{MP2}} = 3.440967193$  kcal/mol Li vs. **5** monomer with three THF

$\Delta G_{\text{MP2}} = -6.11651056$  kcal/mol Li vs. **5** monomer (*S,S*)-**6** transition state

| Atom | X          | Y           | Z           | Atom | X           | Y           | Z           |
|------|------------|-------------|-------------|------|-------------|-------------|-------------|
| Li   | 0.00000000 | 0.00000000  | 0.00000000  | H    | 6.20164762  | 2.32780443  | -7.48693840 |
| O    | 0.00000000 | 0.00000000  | -2.02475640 | H    | 6.65811512  | 0.21714067  | -8.72290424 |
| C    | 0.95232866 | 0.00000000  | -2.78494820 | H    | 6.13014066  | -1.96951687 | -7.66023630 |
| N    | 2.26239126 | 0.34320297  | -2.52284753 | H    | 5.15014556  | -2.04279757 | -5.39062523 |
| C    | 2.54651683 | 1.27801325  | -1.41133135 | H    | 2.92368558  | 1.52600488  | -4.13872275 |
| O    | 1.91110732 | 2.30560544  | -1.36130431 | O    | -1.01277107 | 1.63276559  | 0.65204632  |
| C    | 3.60648069 | 0.84959690  | -0.44224426 | C    | -1.37130491 | 2.67702543  | -0.28571870 |
| H    | 4.45153710 | 0.43715575  | -1.00380887 | C    | -1.10601274 | 3.99972445  | 0.43818089  |
| C    | 4.06797328 | 2.03234047  | 0.41324504  | C    | 0.05752304  | 3.62461856  | 1.36934823  |
| H    | 3.25520858 | 2.35117345  | 1.07234805  | C    | -0.31354821 | 2.20380351  | 1.79256165  |
| H    | 4.37260799 | 2.89430427  | -0.19137934 | H    | 0.54677570  | 1.55908345  | 1.99011578  |
| H    | 4.91624551 | 1.73030266  | 1.03617774  | H    | -0.99754572 | 2.20094816  | 2.65248283  |
| C    | 2.99215130 | 0.48053229  | -3.80220638 | H    | 0.99724151  | 3.61232526  | 0.80833437  |
| C    | 2.12040103 | -0.41467945 | -4.69690720 | H    | 0.16393768  | 4.30144507  | 2.22315553  |
| H    | 2.49115083 | -1.44596139 | -4.71929849 | H    | -0.86038445 | 4.80819904  | -0.25720973 |
| H    | 2.01733356 | -0.04346656 | -5.71681997 | H    | -1.98374828 | 4.30559559  | 1.02095897  |
| O    | 0.82480510 | -0.40918418 | -4.07304077 | H    | -2.42031676 | 2.53726021  | -0.56878081 |
| C    | 4.47065593 | 0.05970848  | -3.76832541 | H    | -0.74258526 | 2.57111317  | -1.17555450 |
| H    | 5.01587395 | 0.73170040  | -3.09646518 | O    | 1.63677677  | -0.07850151 | 0.66346058  |
| H    | 4.54031701 | -0.94702489 | -3.34169229 | C    | 2.95896589  | -0.30393087 | 0.48916712  |
| C    | 5.09978119 | 0.09863439  | -5.14795819 | H    | 3.53586728  | -0.20566721 | 1.44198976  |
| C    | 5.36765377 | -1.08228277 | -5.85269758 | C    | 3.29457610  | -1.74065589 | -0.02714027 |
| C    | 5.92477612 | -1.04198067 | -7.13249917 | H    | 2.87778721  | -1.83971061 | -1.04110422 |
| C    | 6.22231008 | 0.18400407  | -7.72816278 | C    | 2.59924286  | -2.77061669 | 0.87484990  |
| C    | 5.96463006 | 1.36857884  | -7.03448621 | H    | 3.00780460  | -2.72663013 | 1.89403507  |
| C    | 5.41011539 | 1.32442935  | -5.75560891 | H    | 2.74964601  | -3.79200282 | 0.50105896  |
| H    | 5.22543437 | 2.25220804  | -5.21794637 | H    | 1.52876857  | -2.56459638 | 0.94082204  |

|   |             |             |             |
|---|-------------|-------------|-------------|
| C | 4.80204685  | -2.03709372 | -0.07911118 |
| H | 5.34229230  | -1.41344309 | -0.80180434 |
| H | 4.98767051  | -3.08293402 | -0.35463840 |
| H | 5.26345658  | -1.87281489 | 0.90399082  |
| O | -1.40055039 | -1.45353733 | 0.31800574  |
| C | -1.38171067 | -2.62110412 | -0.51444581 |
| C | -2.50200009 | -2.40080274 | -1.54679039 |
| C | -3.46726812 | -1.41009008 | -0.83603086 |
| C | -2.78597915 | -1.14077778 | 0.52005309  |
| H | -2.83284001 | -0.10441022 | 0.85658275  |
| H | -3.19046416 | -1.79689562 | 1.30540938  |
| H | -3.55908682 | -0.48533493 | -1.41297486 |
| H | -4.47281296 | -1.82180801 | -0.70446761 |
| H | -2.09258152 | -1.94983325 | -2.45372246 |
| H | -2.98930682 | -3.34162141 | -1.82089293 |
| H | -1.57358020 | -3.50888580 | 0.10671187  |
| H | -0.38204971 | -2.69969144 | -0.94513671 |

**Table 45.** Geometric coordinates and thermally corrected MP2 energies for IRC derived reactants leading to (*R,S*)-6 from 5 dimer with three THF

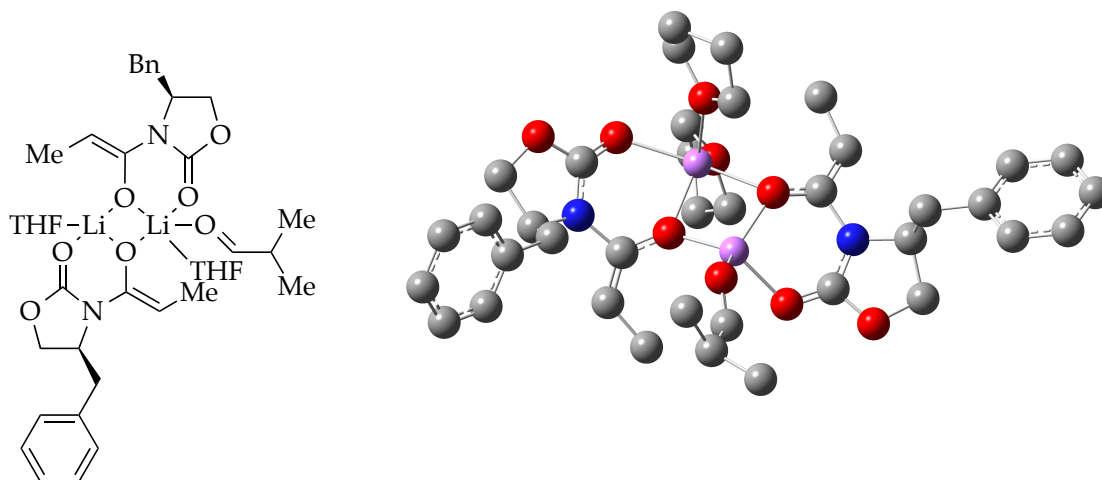

G = -2280.378242 Hartree

G<sub>MP2</sub> = -1426410.726 kcal/mol

ΔG<sub>MP2</sub> = 2.007089482 kcal/mol vs. 5 dimer with three THF and isobutyraldehyde

ΔG<sub>MP2</sub> = -5.751794463 kcal/mol vs. 5 dimer transition state leading to (*R,S*)-6

| Atom | X           | Y           | Z           | Atom | X           | Y           | Z           |
|------|-------------|-------------|-------------|------|-------------|-------------|-------------|
| Li   | 0.00000000  | 0.00000000  | 0.00000000  | H    | 8.72014195  | -0.54059104 | 0.60966039  |
| O    | 0.00000000  | 0.00000000  | 1.96313560  | H    | 10.88362927 | -1.16599348 | -0.41468817 |
| Li   | 1.86056166  | 0.00000000  | 1.96440864  | H    | 10.95722290 | -2.03399772 | -2.74521698 |
| O    | 2.19047654  | -0.23176880 | 0.14317016  | H    | 8.84433406  | -2.26237340 | -4.03971546 |
| C    | 3.01252308  | -1.03021680 | -0.45146984 | H    | 6.68323972  | -1.63567816 | -3.01152596 |
| N    | 4.06244493  | -1.62079737 | 0.40509651  | C    | 3.04816421  | -1.37759953 | -1.76889049 |
| C    | 5.40444243  | -1.97255328 | -0.07995664 | H    | 3.76943231  | -2.11498084 | -2.10635044 |
| C    | 5.96114166  | -2.70755592 | 1.14877558  | C    | 2.13862863  | -0.77721445 | -2.80345061 |
| H    | 5.81220940  | -3.79145221 | 1.08461346  | H    | 1.65572467  | 0.12555629  | -2.41979347 |
| H    | 7.01464730  | -2.49890424 | 1.34270426  | H    | 2.69529470  | -0.50780507 | -3.71264653 |
| O    | 5.18415735  | -2.20616290 | 2.25145036  | H    | 1.33550127  | -1.46230218 | -3.11592161 |
| C    | 4.01793620  | -1.68940730 | 1.76369254  | O    | 2.53715619  | 1.65853205  | 2.92270441  |
| O    | 3.12624999  | -1.35911111 | 2.54162033  | C    | 2.05379538  | 1.85280358  | 4.26257551  |
| H    | 5.33970857  | -2.65540069 | -0.92964483 | C    | 3.14594768  | 1.26378230  | 5.16996608  |
| C    | 6.21151382  | -0.71842198 | -0.49110853 | C    | 4.44214937  | 1.39262096  | 4.32211050  |
| H    | 5.58721184  | -0.15466410 | -1.19283240 | C    | 3.94482999  | 1.93688065  | 2.96705800  |
| H    | 6.35753584  | -0.09151637 | 0.39759978  | H    | 4.39689943  | 1.45924316  | 2.09498533  |
| C    | 7.54390838  | -1.05933469 | -1.12025595 | H    | 4.09591334  | 3.02381337  | 2.89158711  |
| C    | 7.60219015  | -1.54370627 | -2.43617461 | H    | 4.91716921  | 0.41655866  | 4.19823023  |
| C    | 8.82033732  | -1.89373301 | -3.01748898 | H    | 5.17212677  | 2.07048442  | 4.77543547  |
| C    | 10.00719034 | -1.76398773 | -2.29205167 | H    | 2.93357067  | 0.21243062  | 5.38059166  |
| C    | 9.96517897  | -1.27843367 | -0.98496959 | H    | 3.20945480  | 1.79510997  | 6.12452403  |
| C    | 8.74269531  | -0.93007904 | -0.40617877 | H    | 1.91785057  | 2.93014210  | 4.44218279  |

|   |             |             |            |   |             |             |             |
|---|-------------|-------------|------------|---|-------------|-------------|-------------|
| H | 1.08606041  | 1.35268176  | 4.33517318 | H | 0.93404311  | -1.54253556 | 3.93604345  |
| C | -1.00654432 | -0.09889331 | 2.77811148 | H | -2.02924068 | -0.76659685 | 4.49202958  |
| N | -2.21438938 | 0.61502345  | 2.35662294 | O | 0.23992893  | 1.74579689  | -1.13200516 |
| C | -3.03736795 | 1.43646079  | 3.24721895 | C | 1.10937684  | 2.80451316  | -0.70935534 |
| C | -4.19912997 | 1.78617148  | 2.30022129 | C | 0.18769420  | 4.01780153  | -0.45246980 |
| H | -5.04289512 | 1.09638521  | 2.41631352 | C | -1.11836027 | 3.66490044  | -1.21832182 |
| H | -4.55613626 | 2.81209545  | 2.40765889 | C | -0.76445370 | 2.36007151  | -1.94858204 |
| O | -3.65682602 | 1.62520091  | 0.97796475 | H | -0.34451452 | 2.56152938  | -2.94643391 |
| C | -2.55792427 | 0.80893829  | 1.05324774 | H | -1.59220561 | 1.65655851  | -2.03136020 |
| O | -2.03519325 | 0.36797227  | 0.04117483 | H | -1.42926424 | 4.45216346  | -1.91237125 |
| H | -3.40215778 | 0.84587304  | 4.09169619 | H | -1.94251420 | 3.48588898  | -0.52178805 |
| C | -2.26106357 | 2.66190786  | 3.78445346 | H | 0.64472279  | 4.94525729  | -0.81228352 |
| H | -1.33827564 | 2.28167594  | 4.23678197 | H | -0.00729170 | 4.14138116  | 0.61730728  |
| H | -1.97173291 | 3.29233066  | 2.93470584 | H | 1.65206488  | 2.45210509  | 0.16815166  |
| C | -3.04953797 | 3.46356354  | 4.79580528 | H | 1.83170309  | 3.01824325  | -1.51142096 |
| C | -3.62784729 | 4.69489099  | 4.45935605 | O | -0.27402224 | -1.85749787 | -0.82443682 |
| C | -4.37664700 | 5.41611811  | 5.39202713 | C | 0.28426704  | -2.81308858 | -0.31217191 |
| C | -4.56068720 | 4.91397469  | 6.68047665 | C | 0.11193971  | -4.24060134 | -0.77412866 |
| C | -3.98774031 | 3.68895138  | 7.03086370 | H | -0.41361695 | -4.20775653 | -1.73548775 |
| C | -3.23945336 | 2.97313792  | 6.09705624 | C | -0.76290212 | -4.98208054 | 0.25866797  |
| H | -2.78678051 | 2.02521464  | 6.38119715 | H | -0.89081189 | -6.02853784 | -0.04024561 |
| H | -4.11952113 | 3.29330190  | 8.03465886 | H | -0.29814946 | -4.97148865 | 1.25225839  |
| H | -5.14171739 | 5.47394715  | 7.40828287 | H | -1.75427456 | -4.52476393 | 0.34210310  |
| H | -4.81243726 | 6.37144581  | 5.11117122 | C | 1.48190165  | -4.91870589 | -0.94250525 |
| H | -3.48013082 | 5.09863798  | 3.45979254 | H | 2.02913535  | -4.93896597 | 0.00837244  |
| C | -1.07684743 | -0.74802268 | 3.96963243 | H | 1.35369830  | -5.95445162 | -1.27656316 |
| C | 0.05490960  | -1.51988128 | 4.58635671 | H | 2.09978475  | -4.38950774 | -1.67476329 |
| H | 0.36995348  | -1.10592844 | 5.55784378 | H | 0.93390033  | -2.66356209 | 0.57162331  |
| H | -0.22978332 | -2.56479539 | 4.78020527 |   |             |             |             |

**Table 46.** Geometric coordinates and thermally corrected MP2 energies for IRC derived products leading to (*R,S*)-6 from 5 dimer with three THF

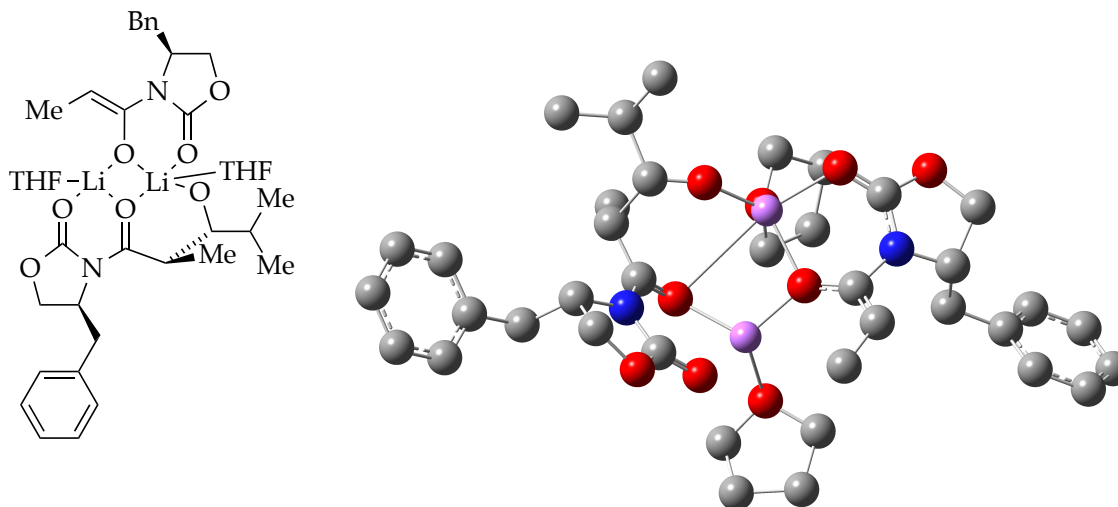

$G = -2280.370915$  Hartree

$G_{\text{MP2}} = -1426410.187$  kcal/mol

$\Delta G_{\text{MP2}} = 2.546300776$  kcal/mol vs. 5 dimer with three THF and isobutyraldehyde

$\Delta G_{\text{MP2}} = -5.21258317$  kcal/mol vs. 5 dimer transition state leading to (*R,S*)-6

| Atom | X          | Y           | Z           | Atom | X          | Y           | Z           |
|------|------------|-------------|-------------|------|------------|-------------|-------------|
| Li   | 0.00000000 | 0.00000000  | 0.00000000  | C    | 7.56059455 | -4.88408228 | 0.32987049  |
| O    | 0.00000000 | 0.00000000  | 2.01264840  | H    | 7.67246811 | -4.66342630 | 1.38945854  |
| Li   | 1.81434575 | 0.00000000  | 2.41230253  | H    | 8.93492058 | -6.54113761 | 0.38832749  |
| O    | 2.91093690 | 0.00694140  | 0.80303784  | H    | 8.70934308 | -7.04375480 | -2.03766332 |
| C    | 3.29871924 | -0.96693513 | 0.15807046  | H    | 7.21052907 | -5.64716160 | -3.44987762 |
| N    | 3.64483486 | -2.16106188 | 0.84634573  | H    | 5.94995030 | -3.77444658 | -2.44977172 |
| C    | 4.40828346 | -3.29614818 | 0.29185562  | C    | 3.27878923 | -1.01490310 | -1.32284915 |
| C    | 4.10831484 | -4.36125370 | 1.35578283  | H    | 4.08279836 | -1.64791994 | -1.70819450 |
| H    | 3.23260201 | -4.96621200 | 1.10149677  | C    | 3.34702432 | 0.38744941  | -1.92844440 |
| H    | 4.95707343 | -5.00975831 | 1.57374301  | H    | 2.44486996 | 0.94552941  | -1.66818446 |
| O    | 3.80005236 | -3.60442030 | 2.54791354  | H    | 4.21729501 | 0.94489286  | -1.56169037 |
| C    | 3.39612430 | -2.36540596 | 2.19684505  | H    | 3.42294280 | 0.32566061  | -3.01824676 |
| O    | 2.89810454 | -1.59974706 | 3.00280611  | O    | 2.33960876 | 1.41449909  | 3.70687927  |
| H    | 3.99431932 | -3.59110287 | -0.67256195 | C    | 1.56878212 | 1.58303924  | 4.91333197  |
| C    | 5.91245542 | -2.96055048 | 0.15977585  | C    | 2.43724200 | 1.01430960  | 6.05978222  |
| H    | 6.00680682 | -2.05513757 | -0.45146930 | C    | 3.83824442 | 0.82672872  | 5.41772195  |
| H    | 6.30296235 | -2.71405029 | 1.15493188  | C    | 3.71761800 | 1.56689060  | 4.08140540  |
| C    | 6.71071730 | -4.09200608 | -0.45317089 | H    | 4.32184237 | 1.14984406  | 3.27336104  |
| C    | 6.59671022 | -4.38316305 | -1.82102602 | H    | 3.94730080 | 2.63787626  | 4.18714069  |
| C    | 7.30964080 | -5.43890234 | -2.38800063 | H    | 4.03210698 | -0.23335553 | 5.23379292  |
| C    | 8.15190901 | -6.22257440 | -1.59558956 | H    | 4.64718251 | 1.22301955  | 6.03894082  |
| C    | 8.27718694 | -5.94141099 | -0.23510674 | H    | 2.04221752 | 0.06114375  | 6.42084321  |

|   |             |             |             |   |             |             |             |
|---|-------------|-------------|-------------|---|-------------|-------------|-------------|
| H | 2.46355858  | 1.70614756  | 6.90731321  | H | -0.46197876 | -2.18047168 | -2.98423471 |
| H | 1.36885151  | 2.65408699  | 5.05645939  | C | 2.85871118  | -2.61878640 | -3.90170807 |
| H | 0.62174563  | 1.06030548  | 4.76534522  | H | 3.07604100  | -3.58400184 | -3.42044626 |
| C | -1.10337928 | -0.16386177 | 2.68525210  | H | 2.62979652  | -2.83175414 | -4.95323906 |
| N | -2.25620396 | 0.59542808  | 2.18449447  | H | 3.77691142  | -2.01870541 | -3.88758421 |
| C | -3.11469432 | 1.43367625  | 3.02257629  | H | 2.00953366  | -2.81637265 | -1.29010782 |
| C | -4.21494467 | 1.80089326  | 2.00920047  |   |             |             |             |
| H | -5.08318457 | 1.13725545  | 2.09009746  |   |             |             |             |
| H | -4.54707683 | 2.83806211  | 2.08393992  |   |             |             |             |
| O | -3.60966329 | 1.60490556  | 0.71919940  |   |             |             |             |
| C | -2.53281116 | 0.76938091  | 0.86382086  |   |             |             |             |
| O | -1.96764011 | 0.29822993  | -0.11099301 |   |             |             |             |
| H | -3.53598468 | 0.85202440  | 3.84680997  |   |             |             |             |
| C | -2.35132829 | 2.64715462  | 3.60338783  |   |             |             |             |
| H | -1.46503426 | 2.25371201  | 4.11373028  |   |             |             |             |
| H | -1.99773709 | 3.26898223  | 2.77187060  |   |             |             |             |
| C | -3.18586881 | 3.46870914  | 4.56073013  |   |             |             |             |
| C | -3.70552058 | 4.71542338  | 4.18744386  |   |             |             |             |
| C | -4.49688051 | 5.45723981  | 5.06720383  |   |             |             |             |
| C | -4.78305240 | 4.96077794  | 6.33908575  |   |             |             |             |
| C | -4.26992206 | 3.72027254  | 6.72588664  |   |             |             |             |
| C | -3.47904142 | 2.98371046  | 5.84471157  |   |             |             |             |
| H | -3.07529853 | 2.02272792  | 6.15741875  |   |             |             |             |
| H | -4.48241657 | 3.32821154  | 7.71717785  |   |             |             |             |
| H | -5.39750644 | 5.53650410  | 7.02597108  |   |             |             |             |
| H | -4.88613712 | 6.42388343  | 4.75822530  |   |             |             |             |
| H | -3.47890297 | 5.11428123  | 3.20082981  |   |             |             |             |
| C | -1.33540362 | -0.90797488 | 3.79716661  |   |             |             |             |
| C | -0.31987037 | -1.76357287 | 4.49830876  |   |             |             |             |
| H | -0.13072252 | -1.43641519 | 5.53400578  |   |             |             |             |
| H | -0.66039660 | -2.80697303 | 4.56757278  |   |             |             |             |
| H | 0.64008250  | -1.77658372 | 3.97545718  |   |             |             |             |
| H | -2.35342741 | -0.95147625 | 4.17488935  |   |             |             |             |
| O | 0.42228794  | 2.01224402  | -0.54798447 |   |             |             |             |
| C | 0.99752685  | 3.06845007  | 0.22939297  |   |             |             |             |
| C | 0.03630254  | 4.27857472  | 0.09956948  |   |             |             |             |
| C | -0.98734011 | 3.82989315  | -0.97492017 |   |             |             |             |
| C | -0.30120370 | 2.62204006  | -1.62163622 |   |             |             |             |
| H | 0.39933343  | 2.93244950  | -2.41333718 |   |             |             |             |
| H | -0.98874638 | 1.87349902  | -2.01738191 |   |             |             |             |
| H | -1.21928590 | 4.61867863  | -1.69756483 |   |             |             |             |
| H | -1.92426082 | 3.50851779  | -0.51007346 |   |             |             |             |
| H | 0.58156235  | 5.17598549  | -0.21079833 |   |             |             |             |
| H | -0.45499929 | 4.51014378  | 1.05000877  |   |             |             |             |
| H | 1.10949598  | 2.69481822  | 1.24926298  |   |             |             |             |
| H | 1.99445288  | 3.31068253  | -0.16604890 |   |             |             |             |
| O | 0.82098088  | -1.15518493 | -1.07808446 |   |             |             |             |
| C | 1.83612947  | -1.76916000 | -1.66494278 |   |             |             |             |
| C | 1.67820396  | -1.91828545 | -3.21386717 |   |             |             |             |
| H | 1.57159342  | -0.90569544 | -3.62596042 |   |             |             |             |
| C | 0.37049357  | -2.67433250 | -3.49002947 |   |             |             |             |
| H | 0.16163217  | -2.72413816 | -4.56650861 |   |             |             |             |
| H | 0.43095366  | -3.70559602 | -3.11408380 |   |             |             |             |

**Table 47.** Geometric coordinates and thermally corrected MP2 energies for IRC derived reactants leading to (*S,R*)-6 from 5 dimer with three THF

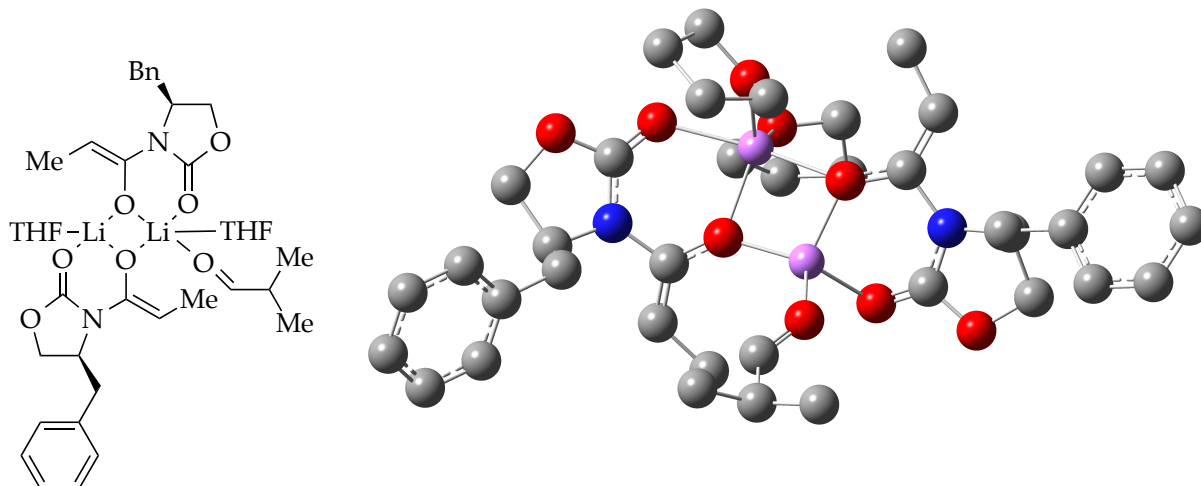

G = -2280.377656 Hartree

$G_{\text{MP2}} = -1426410.255$  kcal/mol

$\Delta G_{\text{MP2}} = 2.477608632$  kcal/mol vs. 5 dimer with three THF and isobutyraldehyde

$\Delta G_{\text{MP2}} = -8.146462528$  kcal/mol vs. 5 dimer transition state leading to (*S,R*)-6

| Atom | X           | Y           | Z           | Atom | X           | Y           | Z           |
|------|-------------|-------------|-------------|------|-------------|-------------|-------------|
| Li   | 0.00000000  | 0.00000000  | 0.00000000  | O    | -0.39070276 | 0.16998598  | -2.11008714 |
| O    | 0.00000000  | 0.00000000  | 2.11681690  | H    | -4.17683318 | -1.55330075 | -3.15969502 |
| C    | 0.79926558  | 0.00000000  | 3.13669465  | C    | -4.81030452 | 0.17867725  | -2.02503074 |
| N    | 0.39315558  | -0.86287656 | 4.26288126  | H    | -4.92889625 | -0.35978294 | -1.07781650 |
| C    | 0.57705805  | -0.50022151 | 5.67312033  | H    | -4.41206198 | 1.17288069  | -1.78790326 |
| C    | 0.19891777  | -1.82662718 | 6.35225220  | C    | -6.14181553 | 0.29451848  | -2.73275345 |
| H    | 1.07782412  | -2.44663715 | 6.56238672  | C    | -6.54613656 | 1.49492915  | -3.33218043 |
| H    | -0.37957258 | -1.69867543 | 7.26897930  | C    | -7.76326995 | 1.58462868  | -4.01112188 |
| O    | -0.61988638 | -2.51044392 | 5.38666325  | C    | -8.59835250 | 0.47070344  | -4.10111091 |
| C    | -0.38313932 | -1.97538873 | 4.15425079  | C    | -8.21024275 | -0.73150323 | -3.50485244 |
| O    | -0.86061530 | -2.49792899 | 3.14990883  | C    | -6.99429833 | -0.81648711 | -2.82729448 |
| Li   | -1.47252285 | -1.13296836 | 1.91298044  | H    | -6.70230644 | -1.75461774 | -2.35919710 |
| O    | -1.70153021 | -1.04063319 | 0.07252047  | H    | -8.85736191 | -1.60278591 | -3.56405835 |
| C    | -2.40758053 | -1.58845264 | -0.86725292 | H    | -9.54652055 | 0.53878308  | -4.62748974 |
| N    | -2.51445860 | -0.79692456 | -2.09569710 | H    | -8.05903436 | 2.52649059  | -4.46580054 |
| C    | -3.75309381 | -0.59471096 | -2.84775395 | H    | -5.90616665 | 2.37162961  | -3.25696922 |
| C    | -3.21290913 | 0.17188377  | -4.07015686 | C    | -3.07048432 | -2.77614684 | -0.85609393 |
| H    | -3.02507741 | -0.49392375 | -4.92006514 | C    | -3.07703944 | -3.73719175 | 0.29955769  |
| H    | -3.86128343 | 0.98896518  | -4.39192976 | H    | -2.75740994 | -4.74055296 | -0.01610113 |
| O    | -1.95780405 | 0.72467071  | -3.63743770 | H    | -2.39761445 | -3.42382513 | 1.09777069  |
| C    | -1.52189567 | 0.02123296  | -2.54380555 | H    | -4.07713117 | -3.86523701 | 0.74603993  |



|   |             |             |             |   |             |             |             |
|---|-------------|-------------|-------------|---|-------------|-------------|-------------|
| H | -3.57335529 | -3.09461449 | -1.76502539 | C | 2.50954128  | 1.69389723  | 2.34332956  |
| O | -3.24977684 | -0.65909426 | 2.82819198  | H | 1.83713953  | 1.83617926  | 1.49403184  |
| C | -4.32997628 | -0.89603116 | 2.31296190  | H | 2.67508005  | 2.67692972  | 2.81100923  |
| H | -4.36689705 | -1.30244220 | 1.28322198  | H | 3.48601730  | 1.37756201  | 1.94361958  |
| C | -5.66482486 | -0.66678205 | 2.98187537  | O | 1.59350826  | -1.24035042 | -0.41108033 |
| H | -6.15063143 | -1.65743372 | 2.98629462  | C | 2.61200853  | -1.62500271 | 0.53161395  |
| C | -5.52939786 | -0.15445095 | 4.41628346  | C | 2.44220770  | -3.13283568 | 0.69160287  |
| H | -6.51653348 | -0.05518806 | 4.88010976  | C | 2.11560173  | -3.55432094 | -0.75062514 |
| H | -4.92758048 | -0.83595527 | 5.02483124  | C | 1.29594450  | -2.36308528 | -1.27960192 |
| H | -5.04205062 | 0.82614122  | 4.43564224  | H | 0.22006048  | -2.54580728 | -1.22098466 |
| C | -6.52418808 | 0.25552691  | 2.09009231  | H | 1.55133414  | -2.09209438 | -2.30919812 |
| H | -6.60069787 | -0.12274585 | 1.06422629  | H | 1.55877543  | -4.49443560 | -0.80992564 |
| H | -7.53823666 | 0.33246796  | 2.49523406  | H | 3.04041633  | -3.67540359 | -1.32743175 |
| H | -6.09913837 | 1.26505102  | 2.05017352  | H | 1.59904632  | -3.34328953 | 1.35958149  |
| H | 1.62181702  | -0.25758940 | 5.87798013  | H | 3.33590666  | -3.62215255 | 1.09243533  |
| C | -0.31166565 | 0.70212785  | 6.06960018  | H | 3.60305979  | -1.38097328 | 0.11826203  |
| H | -0.10400362 | 1.50032447  | 5.34812760  | H | 2.45352730  | -1.05241123 | 1.44626919  |
| H | -1.36304523 | 0.41528888  | 5.94608051  | O | 0.02788598  | 2.14126599  | -0.01988689 |
| C | -0.05267828 | 1.18455904  | 7.47928842  | C | -0.79758518 | 2.86928793  | 0.89767273  |
| C | 1.10885916  | 1.91449702  | 7.77606365  | C | -1.85814439 | 3.54534106  | 0.01241633  |
| C | 1.37538706  | 2.34003879  | 9.07684714  | C | -1.13810402 | 3.71283194  | -1.35608337 |
| C | 0.48169054  | 2.04406926  | 10.10910697 | C | 0.22069935  | 3.01221558  | -1.14267560 |
| C | -0.67931390 | 1.32344947  | 9.82828778  | H | 1.00807406  | 3.74127288  | -0.89778505 |
| C | -0.94173222 | 0.89823097  | 8.52397978  | H | 0.53820149  | 2.39347295  | -1.98054368 |
| H | -1.85551910 | 0.34715618  | 8.31107177  | H | -1.00670640 | 4.76374038  | -1.63295335 |
| H | -1.38493017 | 1.09420455  | 10.62270630 | H | -1.69816215 | 3.22478048  | -2.15881162 |
| H | 0.68717219  | 2.37763965  | 11.12273593 | H | -2.19640168 | 4.49712825  | 0.43445872  |
| H | 2.27849196  | 2.90819660  | 9.28458877  | H | -2.73449523 | 2.89661706  | -0.08973514 |
| H | 1.80372735  | 2.15893585  | 6.97510697  | H | -1.17786416 | 2.15329493  | 1.62628477  |
| C | 1.95174572  | 0.70006339  | 3.32174496  | H | -0.18385960 | 3.61894192  | 1.42142668  |
| H | 2.53579625  | 0.51573814  | 4.21828023  |   |             |             |             |

**Table 48.** Geometric coordinates and thermally corrected MP2 energies for IRC derived products leading to (*S,R*)-6 from 5 dimer with three THF

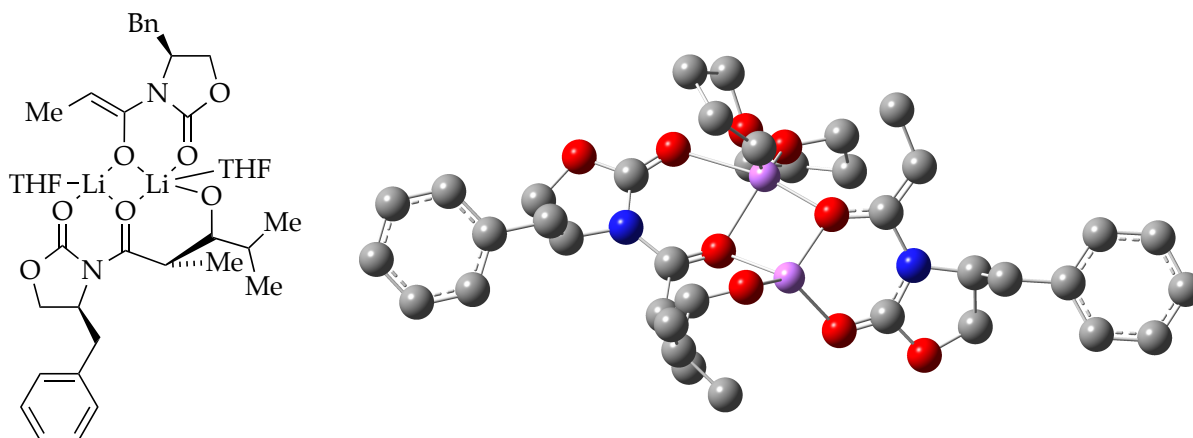

G = -2280.364449 Hartree

G<sub>MP2</sub> = -1426406.566 kcal/mol

ΔG<sub>MP2</sub> = 6.166755249 kcal/mol vs. 5 dimer with three THF and isobutyraldehyde

ΔG<sub>MP2</sub> = -4.457315911 kcal/mol vs. 5 dimer transition state leading to (*S,R*)-6

| Atom | X           | Y           | Z           | Atom | X           | Y           | Z           |
|------|-------------|-------------|-------------|------|-------------|-------------|-------------|
| Li   | 0.00000000  | 0.00000000  | 0.00000000  | H    | -4.71990760 | -1.08390114 | -2.76732026 |
| O    | 0.00000000  | 0.00000000  | 1.94385910  | C    | -4.56743869 | 1.07331416  | -3.04319823 |
| C    | 0.78515689  | 0.00000000  | 2.97479469  | H    | -4.86261461 | 1.34638430  | -2.02421445 |
| N    | 0.47094327  | -1.01064529 | 3.98660964  | H    | -3.78406897 | 1.78024889  | -3.34348874 |
| C    | 1.25481379  | -1.24478785 | 5.20576890  | C    | -5.75151857 | 1.16797502  | -3.98225983 |
| C    | 0.78988807  | -2.66452919 | 5.54871560  | C    | -5.63169406 | 1.76662464  | -5.24364784 |
| H    | 1.41519781  | -3.43076532 | 5.07495550  | C    | -6.72089083 | 1.82639369  | -6.11567515 |
| H    | 0.72499690  | -2.85875337 | 6.62036286  | C    | -7.95020013 | 1.28658808  | -5.73690437 |
| O    | -0.53381760 | -2.73904786 | 4.99094204  | C    | -8.08533844 | 0.69260104  | -4.47990509 |
| C    | -0.64079340 | -1.81084025 | 3.99473466  | C    | -6.99576174 | 0.63587445  | -3.61147334 |
| O    | -1.64333371 | -1.78088740 | 3.29406871  | H    | -7.11602363 | 0.18572870  | -2.62802710 |
| Li   | -1.87200008 | -0.35446463 | 2.00758908  | H    | -9.04227414 | 0.27970437  | -4.17219349 |
| O    | -1.85826583 | -0.94813976 | -0.04869141 | H    | -8.79978883 | 1.33446203  | -6.41247757 |
| C    | -2.90216023 | -0.75811885 | -0.68185568 | H    | -6.60846637 | 2.29995335  | -7.08729972 |
| N    | -2.82841445 | -0.45136030 | -2.05589450 | H    | -4.68049237 | 2.20367301  | -5.54069069 |
| C    | -3.95314183 | -0.34554616 | -3.00776129 | C    | -4.23178212 | -0.77987193 | -0.01028456 |
| C    | -3.22789588 | -0.72069379 | -4.30771678 | C    | -4.39414901 | -2.04996008 | 0.84120857  |
| H    | -3.25173201 | -1.79856470 | -4.50216792 | H    | -5.42803914 | -2.13503418 | 1.18512998  |
| H    | -3.59714787 | -0.18261408 | -5.18083365 | H    | -4.16107356 | -2.95291979 | 0.26325995  |
| O    | -1.86022696 | -0.32770159 | -4.07776006 | H    | -3.74247762 | -2.03423253 | 1.71741606  |
| C    | -1.61380852 | -0.30304805 | -2.74330424 | H    | -5.04356217 | -0.72752108 | -0.74109724 |
| O    | -0.50204509 | -0.16134657 | -2.29323389 | O    | -3.29685184 | 0.72857472  | 1.74466976  |

|   |             |             |             |   |             |            |             |
|---|-------------|-------------|-------------|---|-------------|------------|-------------|
| C | -4.29233939 | 0.61733228  | 0.86319567  | H | -0.29653580 | 4.84807179 | -1.95856646 |
| H | -4.23738427 | 1.39125979  | 0.05106183  | H | -1.37250450 | 3.53979997 | -2.46212569 |
| C | -5.73287998 | 0.79193915  | 1.47999587  | H | -1.41867747 | 4.98957483 | 0.15597982  |
| H | -6.46624280 | 0.28705684  | 0.82930421  | H | -2.63388096 | 3.90912333 | -0.52445555 |
| C | -5.84120054 | 0.21821694  | 2.89923138  | H | -1.81676552 | 2.26939981 | 1.03903322  |
| H | -6.84075744 | 0.40587999  | 3.31219985  | H | -0.34767218 | 3.24875710 | 1.32820711  |
| H | -5.65918904 | -0.85887535 | 2.93779323  |   |             |            |             |
| H | -5.09856904 | 0.69495969  | 3.54471994  |   |             |            |             |
| C | -6.08129065 | 2.28948560  | 1.50462304  |   |             |            |             |
| H | -6.10484557 | 2.71699370  | 0.49405589  |   |             |            |             |
| H | -7.06137892 | 2.46544579  | 1.96549460  |   |             |            |             |
| H | -5.32997160 | 2.83876283  | 2.08436638  |   |             |            |             |
| H | 2.32203985  | -1.22527374 | 4.97222043  |   |             |            |             |
| C | 0.92847390  | -0.21229241 | 6.31546301  |   |             |            |             |
| H | 1.05412292  | 0.78746055  | 5.88808864  |   |             |            |             |
| H | -0.13157723 | -0.31714117 | 6.57703089  |   |             |            |             |
| C | 1.79098590  | -0.37883121 | 7.54732128  |   |             |            |             |
| C | 3.13309399  | 0.03152240  | 7.53959520  |   |             |            |             |
| C | 3.94349406  | -0.14378567 | 8.66082838  |   |             |            |             |
| C | 3.42488812  | -0.73334998 | 9.81616555  |   |             |            |             |
| C | 2.09123653  | -1.14192775 | 9.84061333  |   |             |            |             |
| C | 1.28384505  | -0.96566070 | 8.71479974  |   |             |            |             |
| H | 0.24152197  | -1.27604859 | 8.74566548  |   |             |            |             |
| H | 1.67527889  | -1.59450027 | 10.73704092 |   |             |            |             |
| H | 4.05463229  | -0.86735406 | 10.69160190 |   |             |            |             |
| H | 4.97906645  | 0.18560405  | 8.63517289  |   |             |            |             |
| H | 3.54317311  | 0.50357504  | 6.64899636  |   |             |            |             |
| C | 1.87002240  | 0.79613557  | 3.19188771  |   |             |            |             |
| H | 2.45434904  | 0.68488654  | 4.09752463  |   |             |            |             |
| C | 2.30287796  | 1.87392758  | 2.23835043  |   |             |            |             |
| H | 1.63493552  | 1.91885769  | 1.37416620  |   |             |            |             |
| H | 2.29870185  | 2.86711479  | 2.71297402  |   |             |            |             |
| H | 3.32667988  | 1.71723492  | 1.86301906  |   |             |            |             |
| O | 1.61418748  | -1.14121235 | -0.53289529 |   |             |            |             |
| C | 2.75755210  | -1.34256107 | 0.32513461  |   |             |            |             |
| C | 2.88007427  | -2.85721742 | 0.46368322  |   |             |            |             |
| C | 2.49696191  | -3.32493171 | -0.94913282 |   |             |            |             |
| C | 1.41073585  | -2.31666790 | -1.35643674 |   |             |            |             |
| H | 0.40311389  | -2.69370043 | -1.15138703 |   |             |            |             |
| H | 1.46531051  | -2.02425539 | -2.40848517 |   |             |            |             |
| H | 2.13501934  | -4.35709599 | -0.98156903 |   |             |            |             |
| H | 3.36209544  | -3.25162949 | -1.61868647 |   |             |            |             |
| H | 2.15831033  | -3.22568276 | 1.20207376  |   |             |            |             |
| H | 3.88156660  | -3.17633119 | 0.76903582  |   |             |            |             |
| H | 3.65007442  | -0.91737092 | -0.15751927 |   |             |            |             |
| H | 2.56965216  | -0.81718237 | 1.26303874  |   |             |            |             |
| O | -0.30352791 | 2.00210841  | -0.33221649 |   |             |            |             |
| C | -1.03757195 | 2.87103617  | 0.56202581  |   |             |            |             |
| C | -1.56329260 | 4.01940323  | -0.32962091 |   |             |            |             |
| C | -0.74112838 | 3.89921553  | -1.64220386 |   |             |            |             |
| C | 0.32310216  | 2.84768125  | -1.29951763 |   |             |            |             |
| H | 1.21594308  | 3.31748877  | -0.85723357 |   |             |            |             |
| H | 0.62719298  | 2.22030626  | -2.13970623 |   |             |            |             |

**Table 49.** Geometric coordinates and thermally corrected MP2 energies for IRC derived reactants leading to (*R,R*)-6 from 5 dimer with three THF

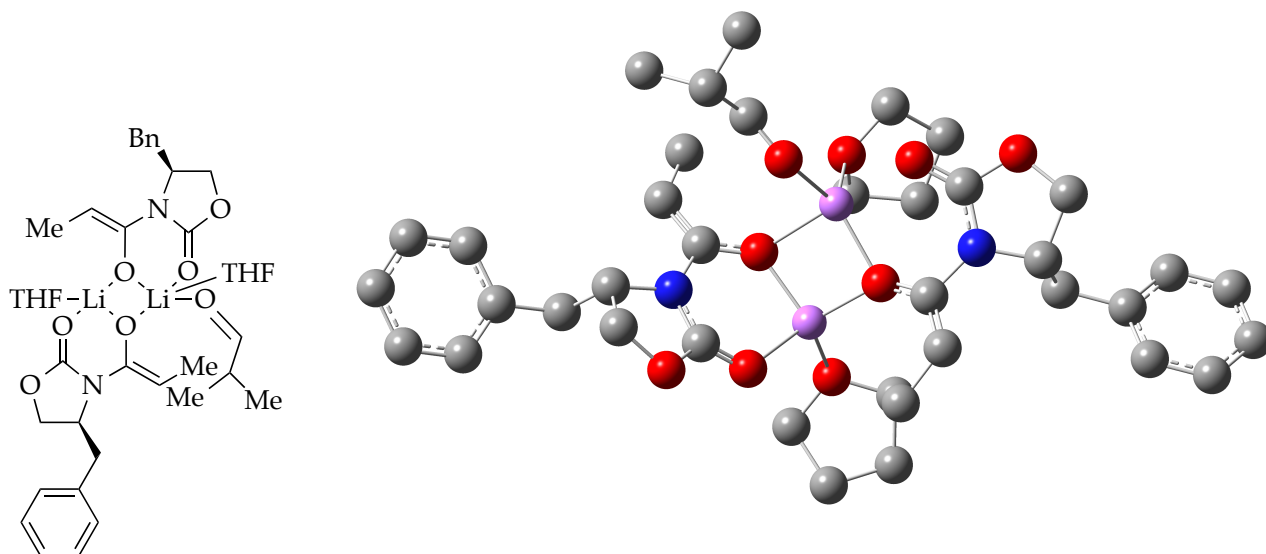

$G = -2280.37782$  Hartree

$G_{\text{MP2}} = -1426409.915$  kcal/mol

$\Delta G_{\text{MP2}} = -5.856926396$  kcal/mol vs. 5 dimer with three THF and isobutyraldehyde

$\Delta G_{\text{MP2}} = 2.817500077$  kcal/mol vs. 5 dimer transition state leading to (*R,R*)-6

| Atom | X          | Y           | Z           | Atom | X          | Y           | Z           |
|------|------------|-------------|-------------|------|------------|-------------|-------------|
| Li   | 0.00000000 | 0.00000000  | 0.00000000  | C    | 7.76064247 | -3.96785530 | -1.07163805 |
| O    | 0.00000000 | 0.00000000  | 1.96705330  | H    | 7.86408259 | -3.94440843 | 0.01115784  |
| Li   | 1.87777764 | 0.00000000  | 1.90962824  | H    | 9.28140427 | -5.47218852 | -1.32136481 |
| O    | 2.09252290 | -0.00162736 | 0.03900514  | H    | 9.07657527 | -5.52163471 | -3.80081751 |
| C    | 2.96694253 | -0.59716264 | -0.69850087 | H    | 7.44188414 | -4.02257061 | -4.92911571 |
| N    | 3.59865857 | -1.77352982 | -0.08711238 | H    | 6.02728309 | -2.49796599 | -3.59465319 |
| C    | 4.47758188 | -2.72196334 | -0.78420201 | C    | 3.33091113 | -0.28604638 | -1.97770548 |
| C    | 4.33999006 | -3.93259150 | 0.14432126  | H    | 4.11400768 | -0.85202517 | -2.46848186 |
| H    | 3.49075706 | -4.57003092 | -0.12712944 | C    | 2.81152071 | 0.92294949  | -2.70555421 |
| H    | 5.24525265 | -4.53667167 | 0.21983550  | H    | 1.90304354 | 1.30545764  | -2.23378732 |
| O    | 4.07865335 | -3.34200758 | 1.43233794  | H    | 3.54444248 | 1.74611575  | -2.72440974 |
| C    | 3.52838379 | -2.10946865 | 1.23447134  | H    | 2.57916095 | 0.69711754  | -3.75683195 |
| O    | 3.09806065 | -1.47309312 | 2.19130751  | O    | 2.57973742 | 1.47643275  | 3.07938007  |
| H    | 4.08098401 | -2.93159173 | -1.78034590 | C    | 1.72482243 | 2.05871658  | 4.09364024  |
| C    | 5.93839799 | -2.20785385 | -0.88102877 | C    | 2.59293313 | 2.22107322  | 5.35750212  |
| H    | 5.91666647 | -1.20467620 | -1.31768245 | C    | 3.79771874 | 1.30501672  | 5.07712288  |
| H    | 6.32970223 | -2.10387938 | 0.13853143  | C    | 3.93465840 | 1.42959250  | 3.56209172  |
| C    | 6.83171463 | -3.12123686 | -1.69171736 | H    | 4.41886849 | 0.57717679  | 3.08205435  |
| C    | 6.73216907 | -3.15676779 | -3.09125811 | H    | 4.45946681 | 2.35461943  | 3.27970961  |
| C    | 7.53188840 | -4.01435997 | -3.84592439 | H    | 3.56725025 | 0.26768846  | 5.34390733  |
| C    | 8.45093681 | -4.85502000 | -3.21342495 | H    | 4.70228178 | 1.60842540  | 5.61332940  |
| C    | 8.56451757 | -4.82763778 | -1.82335678 | H    | 2.05105509 | 1.94622013  | 6.26715677  |

|   |             |             |            |   |             |             |             |
|---|-------------|-------------|------------|---|-------------|-------------|-------------|
| H | 2.92379004  | 3.26017969  | 5.46768614 | H | 0.23416591  | -2.64891321 | 4.83581352  |
| H | 1.33978659  | 3.01670276  | 3.72532695 | H | 1.20588153  | -1.58166947 | 3.82840427  |
| H | 0.88308677  | 1.37663080  | 4.23844647 | H | -1.81943760 | -1.27951299 | 4.44912055  |
| C | -0.95837235 | -0.35158530 | 2.76984597 | O | -0.04979693 | 1.96769024  | -0.92886147 |
| N | -2.29389737 | 0.10370303  | 2.36644857 | C | 0.69104919  | 2.96396435  | -0.20954541 |
| C | -3.29564636 | 0.64127325  | 3.28938411 | C | -0.37357765 | 3.69017726  | 0.62014155  |
| C | -4.49774357 | 0.79584942  | 2.33833275 | C | -1.62714313 | 3.64110043  | -0.29432207 |
| H | -5.18289207 | -0.05694916 | 2.40223876 | C | -1.23911727 | 2.62342297  | -1.39503075 |
| H | -5.05890498 | 1.71912775  | 2.49477558 | H | -1.01623675 | 3.13452959  | -2.34349481 |
| O | -3.92707982 | 0.82400503  | 1.01867654 | H | -1.98862299 | 1.85032783  | -1.56158232 |
| C | -2.67227724 | 0.27449790  | 1.07139944 | H | -1.85585987 | 4.61997913  | -0.72818452 |
| O | -2.06278090 | 0.01415021  | 0.04393702 | H | -2.51264793 | 3.30737795  | 0.25415706  |
| H | -3.52767902 | -0.08516184 | 4.07277646 | H | -0.07632263 | 4.71031612  | 0.88405702  |
| C | -2.82719695 | 1.95904427  | 3.95022871 | H | -0.55063159 | 3.13329728  | 1.54579848  |
| H | -1.84987756 | 1.75650821  | 4.40293320 | H | 1.45998213  | 2.44698754  | 0.36450602  |
| H | -2.67571855 | 2.71082127  | 3.16595999 | H | 1.17544694  | 3.64734190  | -0.92553226 |
| C | -3.79440863 | 2.47100347  | 4.99396885 | O | -0.01314799 | -1.56469439 | -1.31521813 |
| C | -4.63030900 | 3.56632334  | 4.73867240 | C | 0.23350063  | -1.50757020 | -2.50775038 |
| C | -5.54108347 | 4.01472823  | 5.69792502 | C | 0.28670756  | -2.71786092 | -3.41369930 |
| C | -5.63065790 | 3.37146212  | 6.93254357 | H | 0.44983893  | -3.59140878 | -2.77124642 |
| C | -4.80089224 | 2.28047274  | 7.20250615 | C | 1.41650143  | -2.59442155 | -4.44615528 |
| C | -3.89214646 | 1.83701272  | 6.24237670 | H | 2.38975318  | -2.48097379 | -3.95805696 |
| H | -3.24171882 | 0.99337635  | 6.46467095 | H | 1.44742758  | -3.48243561 | -5.08727442 |
| H | -4.85798101 | 1.77758782  | 8.16444752 | H | 1.26434518  | -1.72167848 | -5.09327636 |
| H | -6.33738543 | 3.71944439  | 7.68106816 | C | -1.09189881 | -2.85774131 | -4.09700521 |
| H | -6.17703980 | 4.86888042  | 5.48011238 | H | -1.09318645 | -3.72725080 | -4.76389480 |
| H | -4.55911269 | 4.08099758  | 3.78258528 | H | -1.88859995 | -2.98752754 | -3.35770044 |
| C | -0.89132066 | -1.04773160 | 3.93464715 | H | -1.32611842 | -1.97287528 | -4.70179013 |
| C | 0.37083797  | -1.60109892 | 4.53404960 | H | 0.36529778  | -0.52467307 | -3.00117587 |
| H | 0.68826625  | -1.06158938 | 5.44222466 |   |             |             |             |

**Table 50.** Geometric coordinates and thermally corrected MP2 energies for IRC derived products leading to (*R,R*)-6 from 5 dimer with three THF

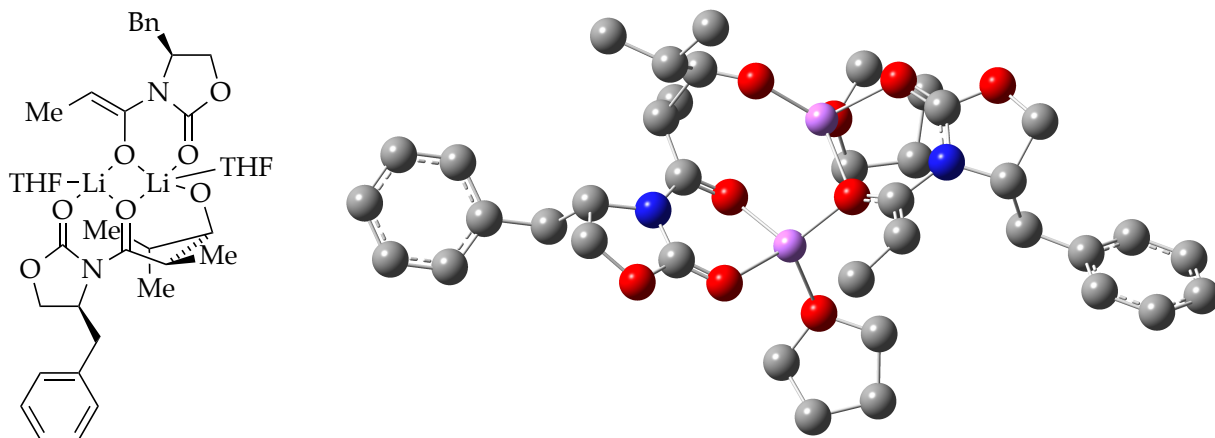

G = -2280.368139 Hartree

G<sub>MP2</sub> = -1426407.684 kcal/mol

ΔG<sub>MP2</sub> = 5.048707634 kcal/mol vs. 5 dimer with three THF and isobutyraldehyde

ΔG<sub>MP2</sub> = -3.625718839 kcal/mol vs. 5 dimer transition state leading to (*R,R*)-6

| Atom | X          | Y           | Z           | Atom | X          | Y           | Z           |
|------|------------|-------------|-------------|------|------------|-------------|-------------|
| Li   | 0.00000000 | 0.00000000  | 0.00000000  | C    | 9.10679348 | -4.89726373 | -0.18437012 |
| O    | 0.00000000 | 0.00000000  | 2.01276920  | C    | 8.19132601 | -3.96351049 | 0.30609583  |
| Li   | 1.84125504 | 0.00000000  | 2.31398683  | H    | 8.27340052 | -3.61885706 | 1.33490257  |
| O    | 2.72958483 | -0.08715780 | 0.59533792  | H    | 9.88879180 | -5.27899722 | 0.46655769  |
| C    | 3.24017276 | -1.03894350 | 0.00307938  | H    | 9.73206560 | -6.05845931 | -1.89099375 |
| N    | 3.80822575 | -2.09972845 | 0.77001428  | H    | 7.94585460 | -5.15564364 | -3.36931499 |
| C    | 4.78090272 | -3.09700179 | 0.28254084  | H    | 6.33443088 | -3.49774669 | -2.50103928 |
| C    | 4.76501952 | -4.07860936 | 1.46192129  | C    | 3.15067203 | -1.19282409 | -1.45973822 |
| H    | 4.02772353 | -4.87614519 | 1.32657422  | H    | 3.90152015 | -1.88095275 | -1.85294929 |
| H    | 5.74114140 | -4.51087798 | 1.68300834  | C    | 3.22474694 | 0.15983044  | -2.17533515 |
| O    | 4.35815153 | -3.27705896 | 2.59227279  | H    | 2.38790995 | 0.78898796  | -1.86390215 |
| C    | 3.68731043 | -2.19142067 | 2.14912555  | H    | 4.16134005 | 0.69070904  | -1.96163820 |
| O    | 3.09298807 | -1.45351260 | 2.91583131  | H    | 3.16327437 | 0.00301716  | -3.25772643 |
| H    | 4.40986556 | -3.58161514 | -0.61965115 | O    | 2.36021498 | 1.51915640  | 3.48393093  |
| C    | 6.16634539 | -2.45889495 | 0.02136876  | C    | 1.38826741 | 2.04742986  | 4.42369410  |
| H    | 6.03007142 | -1.63499736 | -0.68900919 | C    | 2.18835845 | 2.51810575  | 5.64858048  |
| H    | 6.52757493 | -2.01542483 | 0.95753592  | C    | 3.48559972 | 1.69936750  | 5.54345473  |
| C    | 7.17748007 | -3.45062965 | -0.51395405 | C    | 3.68841638 | 1.63865622  | 4.03178214  |
| C    | 7.10518479 | -3.89385616 | -1.84305266 | H    | 4.26145709 | 0.77389820  | 3.69131694  |
| C    | 8.01654147 | -4.82708900 | -2.33594515 | H    | 4.15764293 | 2.55691069  | 3.65049490  |
| C    | 9.02016532 | -5.33325035 | -1.50660880 | H    | 3.33947597 | 0.68910950  | 5.94239456  |

|   |             |             |             |   |             |             |             |
|---|-------------|-------------|-------------|---|-------------|-------------|-------------|
| H | 4.33001797  | 2.15888184  | 6.06622357  | H | 3.55848518  | -3.81793474 | -2.63495479 |
| H | 1.64699174  | 2.34987383  | 6.58407010  | H | 2.48257850  | -5.21349559 | -2.50192357 |
| H | 2.41021544  | 3.58924620  | 5.57687845  | H | 2.12625269  | -3.92415568 | -3.65736787 |
| H | 0.83614721  | 2.85689444  | 3.93556120  | C | 0.19809900  | -3.93527318 | -1.67300781 |
| H | 0.68658270  | 1.24243046  | 4.66269965  | H | 0.16444654  | -5.01805088 | -1.49409089 |
| C | -1.05576255 | -0.27056215 | 2.72470136  | H | -0.42685013 | -3.42527915 | -0.93765113 |
| N | -2.29963558 | 0.35497122  | 2.25937059  | H | -0.23291056 | -3.74535189 | -2.66512337 |
| C | -3.29469623 | 0.96149683  | 3.14711111  | H | 1.58351529  | -1.66888735 | -2.88350581 |
| C | -4.42543691 | 1.25078777  | 2.14377350  |   |             |             |             |
| H | -5.17891266 | 0.45507148  | 2.13580460  |   |             |             |             |
| H | -4.91832828 | 2.21063848  | 2.30949707  |   |             |             |             |
| O | -3.78004397 | 1.28122947  | 0.86034378  |   |             |             |             |
| C | -2.58978998 | 0.60881509  | 0.95245130  |   |             |             |             |
| O | -1.95674488 | 0.32727055  | -0.05274296 |   |             |             |             |
| H | -3.63320619 | 0.24354405  | 3.89800561  |   |             |             |             |
| C | -2.74302049 | 2.21627345  | 3.86381385  |   |             |             |             |
| H | -1.81146610 | 1.91609287  | 4.35634780  |   |             |             |             |
| H | -2.48712933 | 2.96674259  | 3.10549004  |   |             |             |             |
| C | -3.70958984 | 2.79287227  | 4.87417697  |   |             |             |             |
| C | -4.43300037 | 3.96243717  | 4.60490071  |   |             |             |             |
| C | -5.34589306 | 4.47211817  | 5.53082765  |   |             |             |             |
| C | -5.55045003 | 3.81671542  | 6.74518951  |   |             |             |             |
| C | -4.83390468 | 2.65136001  | 7.02859879  |   |             |             |             |
| C | -3.92256035 | 2.14662125  | 6.10168952  |   |             |             |             |
| H | -3.36143663 | 1.24342790  | 6.33320705  |   |             |             |             |
| H | -4.98202322 | 2.13757915  | 7.97495289  |   |             |             |             |
| H | -6.25926753 | 4.21196530  | 7.46782014  |   |             |             |             |
| H | -5.89382462 | 5.38276612  | 5.30303175  |   |             |             |             |
| H | -4.27196580 | 4.48478786  | 3.66412814  |   |             |             |             |
| C | -1.15872691 | -1.02016107 | 3.85359130  |   |             |             |             |
| C | -0.02167911 | -1.74133677 | 4.51892712  |   |             |             |             |
| H | 0.24679601  | -1.31135983 | 5.49848851  |   |             |             |             |
| H | -0.27949789 | -2.79281885 | 4.70949073  |   |             |             |             |
| H | 0.88284366  | -1.74299494 | 3.90536723  |   |             |             |             |
| H | -2.14487253 | -1.17258636 | 4.28196479  |   |             |             |             |
| O | 0.47420345  | 1.99476021  | -0.67021013 |   |             |             |             |
| C | 0.97105108  | 3.06429229  | 0.13532588  |   |             |             |             |
| C | -0.23926512 | 3.98680688  | 0.37405889  |   |             |             |             |
| C | -1.16974621 | 3.69293759  | -0.83658694 |   |             |             |             |
| C | -0.42111774 | 2.59251866  | -1.61626649 |   |             |             |             |
| H | 0.16341077  | 3.02002862  | -2.44550061 |   |             |             |             |
| H | -1.06600057 | 1.80042359  | -1.99708478 |   |             |             |             |
| H | -1.33977901 | 4.57876839  | -1.45684798 |   |             |             |             |
| H | -2.14343129 | 3.32741778  | -0.49997824 |   |             |             |             |
| H | 0.05720397  | 5.03892711  | 0.43639258  |   |             |             |             |
| H | -0.73608039 | 3.72566986  | 1.31405129  |   |             |             |             |
| H | 1.39456337  | 2.62917823  | 1.04236674  |   |             |             |             |
| H | 1.76849439  | 3.59398493  | -0.41018103 |   |             |             |             |
| O | 0.67578375  | -1.23097578 | -1.10056823 |   |             |             |             |
| C | 1.61945027  | -1.85043921 | -1.77871673 |   |             |             |             |
| C | 1.63799133  | -3.40704301 | -1.60015099 |   |             |             |             |
| H | 2.01672926  | -3.63664309 | -0.59107074 |   |             |             |             |
| C | 2.50438505  | -4.12604919 | -2.64681488 |   |             |             |             |

**Table 51.** Geometric coordinates and thermally corrected MP2 energies for IRC derived reactants leading to (*S,S*)-6 from 5 dimer with three THF

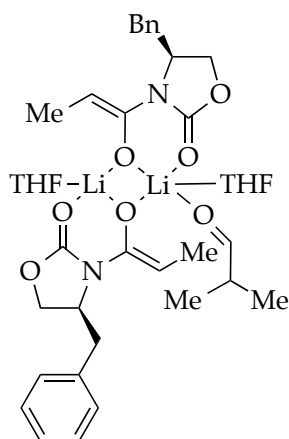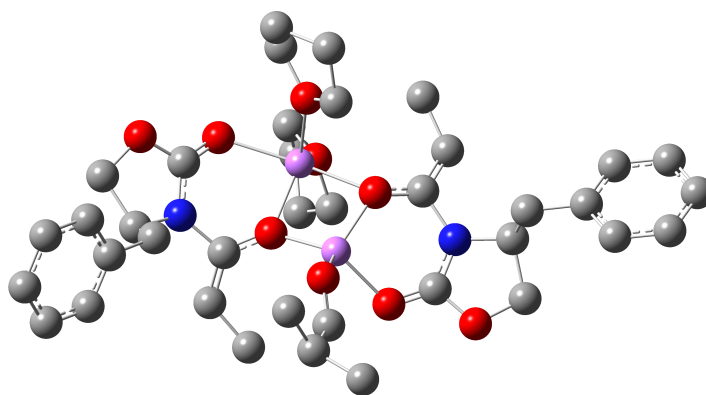

G = -2280.383667 Hartree

G<sub>MP2</sub> = -1426411.693 kcal/mol

ΔG<sub>MP2</sub> = 1.039700804 kcal/mol vs. 5 dimer with three THF and isobutyraldehyde

ΔG<sub>MP2</sub> = -10.03546225 kcal/mol vs. 5 dimer transition state leading to (*S,S*)-6

| Atom | X           | Y           | Z           | Atom | X           | Y           | Z           |
|------|-------------|-------------|-------------|------|-------------|-------------|-------------|
| Li   | 0.00000000  | 0.00000000  | 0.00000000  | H    | -4.40337201 | 0.18031379  | -1.50268407 |
| O    | 0.00000000  | 0.00000000  | 2.13946330  | C    | -6.02464858 | -0.99320089 | -2.31034631 |
| C    | 0.92510137  | 0.00000000  | 3.04210300  | C    | -6.71179761 | 0.12088612  | -2.81111342 |
| N    | 0.63692804  | -0.80850326 | 4.24695856  | C    | -7.98844439 | -0.00932693 | -3.36237140 |
| C    | 1.08660616  | -0.43820342 | 5.59575706  | C    | -8.60022017 | -1.26162735 | -3.42289738 |
| C    | 0.68548474  | -1.69708294 | 6.37918819  | C    | -7.92843056 | -2.38100541 | -2.92539891 |
| H    | 1.51110450  | -2.41347748 | 6.45911233  | C    | -6.65454407 | -2.24600766 | -2.37460667 |
| H    | 0.29293531  | -1.48624020 | 7.37562388  | H    | -6.14165286 | -3.12123961 | -1.98058617 |
| O    | -0.36022416 | -2.29376755 | 5.59152608  | H    | -8.39976096 | -3.35985253 | -2.96233881 |
| C    | -0.26304365 | -1.82463048 | 4.31237738  | H    | -9.59406311 | -1.36539822 | -3.85001427 |
| O    | -0.95284009 | -2.32834977 | 3.42742449  | H    | -8.50479019 | 0.86912962  | -3.74082463 |
| Li   | -1.43759517 | -1.17265159 | 1.94522497  | H    | -6.24573125 | 1.10265176  | -2.75812130 |
| O    | -1.36242006 | -1.40229802 | 0.10939320  | C    | -2.20169429 | -3.43973334 | -0.83335316 |
| C    | -1.88719120 | -2.11973197 | -0.83609942 | C    | -2.00477931 | -4.35227259 | 0.34325850  |
| N    | -2.21272150 | -1.38335478 | -2.06154996 | H    | -2.95063691 | -4.79596199 | 0.69324746  |
| C    | -3.53534807 | -1.40698895 | -2.68877435 | H    | -1.34433856 | -5.19762896 | 0.09848317  |
| C    | -3.26517407 | -0.52196341 | -3.91899966 | H    | -1.55374197 | -3.82347641 | 1.18844827  |
| H    | -3.00002580 | -1.11704598 | -4.80050429 | H    | -2.58547762 | -3.87926071 | -1.75046407 |
| H    | -4.09444742 | 0.14249064  | -4.16941790 | O    | -3.41298614 | -0.88712857 | 2.47264682  |
| O    | -2.12925386 | 0.28145742  | -3.55096162 | C    | -4.00738847 | -1.76272869 | 3.08120088  |
| C    | -1.47585021 | -0.33453445 | -2.51607538 | C    | -5.49100224 | -1.75325860 | 3.36271827  |
| O    | -0.38763892 | 0.06765013  | -2.12877990 | H    | -5.87196241 | -2.67733728 | 2.89513165  |
| H    | -3.79802654 | -2.42281746 | -2.99646888 | C    | -6.20475634 | -0.54129454 | 2.76252454  |
| C    | -4.63037856 | -0.86633806 | -1.73847545 | H    | -7.28190725 | -0.60138973 | 2.95115351  |
| H    | -4.54761976 | -1.43313733 | -0.80401445 | H    | -5.83114778 | 0.38884897  | 3.20371969  |



|   |             |             |             |   |             |             |             |
|---|-------------|-------------|-------------|---|-------------|-------------|-------------|
| H | -6.04709115 | -0.48132836 | 1.68156414  | O | 1.85225297  | -0.79071082 | -0.28819937 |
| C | -5.71137231 | -1.89269415 | 4.88465329  | C | 2.06580910  | -2.08662392 | 0.31264036  |
| H | -5.17724807 | -2.75750056 | 5.29429985  | C | 2.75519684  | -2.92240540 | -0.76610005 |
| H | -5.36375887 | -0.99665814 | 5.41180469  | C | 3.59673890  | -1.86429521 | -1.49674939 |
| H | -6.77692189 | -2.01970914 | 5.10109150  | C | 2.67433117  | -0.63938765 | -1.46397552 |
| H | -3.44199324 | -2.62906093 | 3.47441707  | H | 2.01571794  | -0.59360105 | -2.33739499 |
| H | 2.17066029  | -0.31063377 | 5.61886111  | H | 3.22092262  | 0.30694318  | -1.38423088 |
| C | 0.40771449  | 0.86254648  | 6.08528865  | H | 3.86889957  | -2.15284936 | -2.51687957 |
| H | 0.57037250  | 1.61472309  | 5.30567219  | H | 4.52229220  | -1.66661376 | -0.94257550 |
| H | -0.67326428 | 0.68809557  | 6.15422934  | H | 2.00973261  | -3.35396889 | -1.44417483 |
| C | 0.95127104  | 1.34641870  | 7.41090715  | H | 3.35220113  | -3.73921078 | -0.34817908 |
| C | 2.22032876  | 1.94187034  | 7.48151697  | H | 2.69773802  | -1.96259696 | 1.20192316  |
| C | 2.74582844  | 2.36655312  | 8.70124062  | H | 1.09166396  | -2.47492827 | 0.61706350  |
| C | 2.00928722  | 2.20528031  | 9.87743035  | O | -0.41278405 | 2.07053265  | 0.00059677  |
| C | 0.74456301  | 1.61928043  | 9.82198248  | C | -1.15704695 | 2.70365590  | 1.06735154  |
| C | 0.22277499  | 1.19382394  | 8.59819481  | C | -1.32077974 | 4.17513964  | 0.65748756  |
| H | -0.76922315 | 0.74802644  | 8.56199547  | C | -1.19081549 | 4.11513469  | -0.87296630 |
| H | 0.16006536  | 1.49547203  | 10.73003494 | C | -0.13943198 | 3.02037003  | -1.04569873 |
| H | 2.41689513  | 2.53883877  | 10.82795441 | H | 0.87586701  | 3.42492503  | -0.91416854 |
| H | 3.72875691  | 2.82954081  | 8.73341530  | H | -0.19046997 | 2.48373543  | -1.99384608 |
| H | 2.79444366  | 2.08255081  | 6.56796353  | H | -0.89045153 | 5.06711052  | -1.32221424 |
| C | 2.10979075  | 0.66964288  | 3.04927821  | H | -2.13816637 | 3.80400579  | -1.32971799 |
| H | 2.81068870  | 0.49751419  | 3.86002574  | H | -0.51241924 | 4.78402724  | 1.07985346  |
| C | 2.54525781  | 1.60983699  | 1.96145407  | H | -2.27123709 | 4.59816656  | 0.99770073  |
| H | 1.71423374  | 1.84320454  | 1.29076837  | H | -2.12193628 | 2.19000795  | 1.15340891  |
| H | 2.92529190  | 2.55560949  | 2.37660073  | H | -0.61156484 | 2.56424972  | 2.00291730  |
| H | 3.35353223  | 1.19131878  | 1.34236935  |   |             |             |             |

**Table 52.** Geometric coordinates and thermally corrected MP2 energies for IRC derived products leading to (*S,S*)-**6** from **5** dimer with three THF

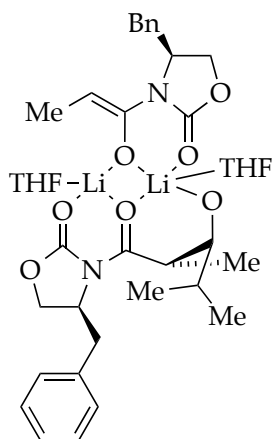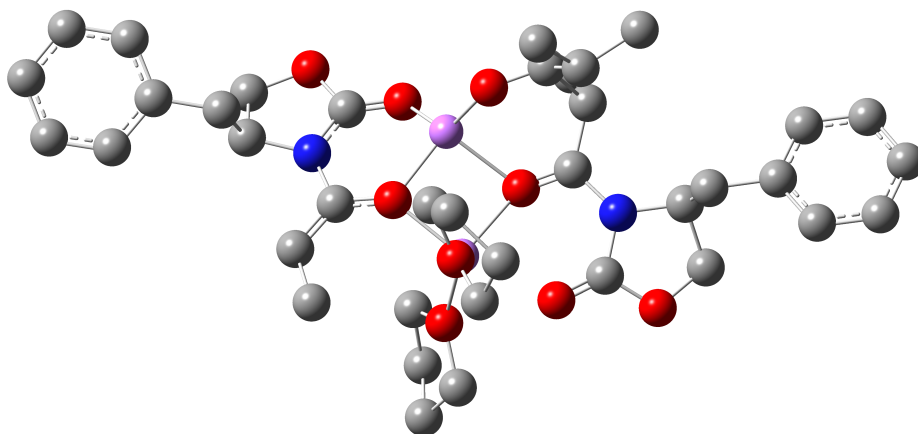

G = -2280.364375 Hartree

G<sub>MP2</sub> = -1426406.503 kcal/mol

ΔG<sub>MP2</sub> = 6.229692127 kcal/mol vs. **5** dimer with three THF and isobutyraldehyde

ΔG<sub>MP2</sub> = -4.845470928 kcal/mol vs. **5** dimer transition state leading to (*S,S*)-**6**

| Atom | X           | Y           | Z           | Atom | X           | Y           | Z           |
|------|-------------|-------------|-------------|------|-------------|-------------|-------------|
| Li   | 0.00000000  | 0.00000000  | 0.00000000  | H    | -5.08013346 | 0.26372079  | -2.54413854 |
| O    | 0.00000000  | 0.00000000  | 1.96146220  | H    | -3.94989132 | 0.64118088  | -3.83610281 |
| C    | 0.86855414  | 0.00000000  | 2.92126141  | C    | -5.66224299 | -0.49937227 | -4.47575505 |
| N    | 0.47500657  | -0.74397814 | 4.12317981  | C    | -5.52680272 | -0.10204067 | -5.81276563 |
| C    | 1.07553561  | -0.53576543 | 5.44700466  | C    | -6.48624370 | -0.45023026 | -6.76595907 |
| C    | 0.52535316  | -1.75727005 | 6.19658481  | C    | -7.59893791 | -1.20505214 | -6.39443460 |
| H    | 1.21833790  | -2.60638522 | 6.16600371  | C    | -7.74861686 | -1.60465430 | -5.06439793 |
| H    | 0.25733003  | -1.54776691 | 7.23361250  | C    | -6.78908674 | -1.25356597 | -4.11523537 |
| O    | -0.66640606 | -2.11291700 | 5.47822508  | H    | -6.92407093 | -1.55788313 | -3.07944774 |
| C    | -0.59989697 | -1.58543977 | 4.22075045  | H    | -8.61707594 | -2.18468529 | -4.76398807 |
| O    | -1.44448420 | -1.88888194 | 3.38762037  | H    | -8.34801598 | -1.47541474 | -7.13354826 |
| Li   | -1.81341910 | -0.56594334 | 2.01495854  | H    | -6.36473270 | -0.12705955 | -7.79637406 |
| O    | -1.75776666 | -1.13829034 | 0.02983703  | H    | -4.66809590 | 0.49750470  | -6.10789007 |
| C    | -2.80179121 | -1.17494575 | -0.62763618 | C    | -4.12429755 | -1.37098698 | 0.02266520  |
| N    | -2.71857309 | -1.00112559 | -2.02988912 | C    | -4.11623137 | -2.64394662 | 0.89122078  |
| C    | -3.74046618 | -1.35200008 | -3.03863557 | H    | -5.11935033 | -2.80342112 | 1.30020694  |
| C    | -2.82603822 | -1.82861796 | -4.17574179 | H    | -3.83713398 | -3.53793048 | 0.31913767  |
| H    | -2.59158561 | -2.89640286 | -4.10492357 | H    | -3.42349010 | -2.54544543 | 1.73083446  |
| H    | -3.21341243 | -1.60107564 | -5.16884739 | H    | -4.92173901 | -1.44866035 | -0.71959442 |
| O    | -1.60912833 | -1.07811995 | -3.98224900 | C    | -4.44043108 | -0.07266596 | 1.02539155  |
| C    | -1.50630627 | -0.71999088 | -2.67757926 | O    | -3.36482525 | 0.31878867  | 1.70671723  |
| O    | -0.50386037 | -0.22143563 | -2.22127370 | C    | -5.14848701 | 1.07766851  | 0.23321210  |
| H    | -4.36581883 | -2.16700957 | -2.67005163 | H    | -4.52189489 | 1.33118912  | -0.63849828 |
| C    | -4.61135597 | -0.14155763 | -3.44481131 | C    | -5.23748797 | 2.32898044  | 1.11850076  |

|   |             |             |             |   |             |            |            |
|---|-------------|-------------|-------------|---|-------------|------------|------------|
| H | -5.68281362 | 3.17006812  | 0.57078479  | H | -1.88096314 | 2.08942974 | 1.05996460 |
| H | -5.86516338 | 2.13303543  | 1.99802293  | H | -0.38537632 | 2.84049465 | 1.66611665 |
| H | -4.24870531 | 2.61462661  | 1.48142515  |   |             |            |            |
| C | -6.55975818 | 0.69837343  | -0.24423279 |   |             |            |            |
| H | -6.58028537 | -0.18081029 | -0.89949234 |   |             |            |            |
| H | -7.20102525 | 0.46974378  | 0.61675790  |   |             |            |            |
| H | -7.03052828 | 1.52362107  | -0.79299372 |   |             |            |            |
| H | -5.23548423 | -0.52450433 | 1.67047721  |   |             |            |            |
| H | 2.16454693  | -0.59284679 | 5.38779505  |   |             |            |            |
| C | 0.65645306  | 0.82369513  | 6.05719492  |   |             |            |            |
| H | 0.89036935  | 1.59369916  | 5.31426393  |   |             |            |            |
| H | -0.43204942 | 0.82116285  | 6.19270536  |   |             |            |            |
| C | 1.35078808  | 1.12027938  | 7.36765336  |   |             |            |            |
| C | 2.70023452  | 1.50579213  | 7.38593958  |   |             |            |            |
| C | 3.35912326  | 1.75457741  | 8.58949166  |   |             |            |            |
| C | 2.67816360  | 1.62386698  | 9.80227835  |   |             |            |            |
| C | 1.33514883  | 1.24645748  | 9.79959669  |   |             |            |            |
| C | 0.67966428  | 0.99699133  | 8.59178542  |   |             |            |            |
| H | -0.37125596 | 0.71545330  | 8.59781183  |   |             |            |            |
| H | 0.79356527  | 1.14962560  | 10.73704666 |   |             |            |            |
| H | 3.18969585  | 1.82053878  | 10.74070400 |   |             |            |            |
| H | 4.40321927  | 2.05697947  | 8.58088880  |   |             |            |            |
| H | 3.23403480  | 1.62323080  | 6.44497947  |   |             |            |            |
| C | 2.08812173  | 0.60840807  | 2.94015616  |   |             |            |            |
| H | 2.74341371  | 0.47734698  | 3.79387577  |   |             |            |            |
| C | 2.60967456  | 1.45418823  | 1.81205270  |   |             |            |            |
| H | 1.80681939  | 1.73370087  | 1.12394140  |   |             |            |            |
| H | 3.06903805  | 2.38058029  | 2.18648798  |   |             |            |            |
| H | 3.38563508  | 0.94362868  | 1.21739495  |   |             |            |            |
| O | 1.64285857  | -1.07836721 | -0.41272658 |   |             |            |            |
| C | 2.06020015  | -2.13324920 | 0.48527232  |   |             |            |            |
| C | 3.07708450  | -2.95615035 | -0.30643516 |   |             |            |            |
| C | 3.73742404  | -1.88170988 | -1.18458937 |   |             |            |            |
| C | 2.55164729  | -0.97382071 | -1.52683820 |   |             |            |            |
| H | 2.03118636  | -1.30018783 | -2.43465849 |   |             |            |            |
| H | 2.83343908  | 0.07726415  | -1.64735056 |   |             |            |            |
| H | 4.22543352  | -2.28575591 | -2.07693359 |   |             |            |            |
| H | 4.48781912  | -1.32980810 | -0.60635494 |   |             |            |            |
| H | 2.56907055  | -3.70123782 | -0.93087681 |   |             |            |            |
| H | 3.78556850  | -3.48142734 | 0.34141442  |   |             |            |            |
| H | 2.50073897  | -1.67658655 | 1.37884830  |   |             |            |            |
| H | 1.16928340  | -2.69330808 | 0.78147044  |   |             |            |            |
| O | -0.28025222 | 2.00986100  | -0.24087294 |   |             |            |            |
| C | -1.02947042 | 2.72057479  | 0.79030000  |   |             |            |            |
| C | -1.44148786 | 4.06659715  | 0.16410642  |   |             |            |            |
| C | -1.25670247 | 3.83190348  | -1.34562685 |   |             |            |            |
| C | -0.06687566 | 2.87466922  | -1.36262758 |   |             |            |            |
| H | 0.88061721  | 3.42280547  | -1.23867983 |   |             |            |            |
| H | -0.00043440 | 2.24727873  | -2.25406699 |   |             |            |            |
| H | -1.07235401 | 4.75261614  | -1.90866735 |   |             |            |            |
| H | -2.13937109 | 3.33937369  | -1.77079910 |   |             |            |            |
| H | -0.78038565 | 4.87315393  | 0.50230782  |   |             |            |            |
| H | -2.46642130 | 4.34195321  | 0.42926816  |   |             |            |            |

**Table 53.** Geometric coordinates and thermally corrected MP2 energies for IRC derived reactants leading to (*R,S*)-**6** from **5** spirocyclic dimer with three THF

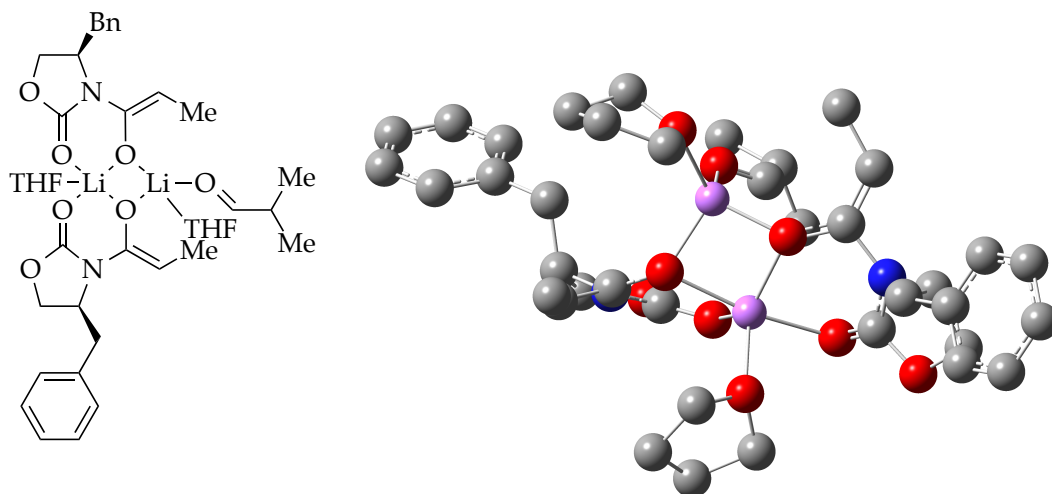

G = -2280.382776 Hartree

G<sub>MP2</sub> = -1426416.289 kcal/mol

ΔG<sub>MP2</sub> = -3.556295138 kcal/mol vs. **5** spirocyclic dimer with three THF and isobutyraldehyde

ΔG<sub>MP2</sub> = -8.070804778 kcal/mol vs. **5** spirocyclic dimer transition state leading to (*R,S*)-**6**

| Atom | X          | Y           | Z           | Atom | X           | Y           | Z           |
|------|------------|-------------|-------------|------|-------------|-------------|-------------|
| Li   | 0.0000000  | 0.0000000   | 0.0000000   | C    | 7.06392920  | -3.89351151 | -1.95638144 |
| Li   | 0.0000000  | 0.0000000   | 2.62264960  | C    | 5.84724270  | -3.27309218 | -1.66432118 |
| O    | 1.42690130 | 0.0000000   | 1.40703456  | H    | 5.00612606  | -3.39023371 | -2.34450208 |
| C    | 2.66212282 | 0.39198929  | 1.29617112  | H    | 7.16474266  | -4.48279716 | -2.86420075 |
| N    | 3.19574647 | 0.37772305  | -0.06685244 | H    | 9.09121825  | -4.24516213 | -1.30740038 |
| C    | 2.44727005 | 0.67978810  | -1.16253473 | H    | 8.83134234  | -2.90746352 | 0.77476189  |
| O    | 1.30484352 | 1.11430058  | -1.21037647 | H    | 6.67122759  | -1.81715784 | 1.28977763  |
| O    | 3.16328442 | 0.43054178  | -2.30058556 | C    | 3.53198675  | 0.78509197  | 2.26246704  |
| C    | 4.51840492 | 0.11335890  | -1.93308274 | H    | 4.51049121  | 1.14095474  | 1.95077855  |
| H    | 5.13720048 | 1.00495312  | -2.08618805 | C    | 3.24707870  | 0.77261931  | 3.73693716  |
| H    | 4.87588830 | -0.68819926 | -2.58200935 | H    | 2.29001593  | 0.29311407  | 3.96126969  |
| C    | 4.44377926 | -0.28603332 | -0.44734151 | H    | 4.02634181  | 0.23124128  | 4.29481109  |
| H    | 5.28914894 | 0.13487816  | 0.10397860  | H    | 3.21399633  | 1.78651932  | 4.16686903  |
| C    | 4.38235321 | -1.81063534 | -0.19184117 | O    | -1.23473538 | -0.84795760 | 1.47167845  |
| H    | 4.11421866 | -1.94640274 | 0.86239093  | C    | -2.52804220 | -0.87919076 | 1.40931252  |
| H    | 3.56600352 | -2.23211481 | -0.79046049 | N    | -3.17024062 | 0.40395480  | 1.09733897  |
| C    | 5.68659085 | -2.51225487 | -0.49833405 | C    | -4.38227896 | 0.90147260  | 1.75676885  |
| C    | 6.78066555 | -2.39251089 | 0.37261095  | C    | -4.61381307 | 2.19849714  | 0.96170940  |
| C    | 7.99775052 | -3.00925430 | 0.08453277  | H    | -5.31757002 | 2.05189014  | 0.13449735  |
| C    | 8.14408452 | -3.76171565 | -1.08336730 | H    | -4.95134096 | 3.03323634  | 1.57825772  |

|   |             |             |             |   |             |             |             |
|---|-------------|-------------|-------------|---|-------------|-------------|-------------|
| O | -3.32602082 | 2.52636233  | 0.40979074  | H | -0.13835031 | -3.14112063 | 6.33319713  |
| C | -2.55507565 | 1.39364285  | 0.39380952  | H | -2.43637275 | -1.87271489 | 4.75556731  |
| O | -1.48581153 | 1.38097337  | -0.20040270 | H | -2.22994678 | -1.91128167 | 6.52239441  |
| H | -5.21606827 | 0.21124457  | 1.60278821  | H | -0.34781529 | -0.33128614 | 6.39424157  |
| C | -4.16803547 | 1.10989711  | 3.27455044  | H | -1.42996489 | 0.32721757  | 5.13947520  |
| H | -3.82533795 | 0.15036314  | 3.67837496  | O | -0.47452641 | 1.98253596  | 2.94082000  |
| H | -3.35453616 | 1.83081417  | 3.41612664  | C | 0.12214956  | 2.77739545  | 2.22266898  |
| C | -5.42025942 | 1.56460838  | 3.99010761  | H | 0.92855493  | 2.41015097  | 1.56685638  |
| C | -5.57455219 | 2.89303344  | 4.40947565  | C | -0.15367157 | 4.25886747  | 2.16562867  |
| C | -6.74379990 | 3.31479236  | 5.04638122  | C | -0.27428048 | 4.70039736  | 0.69100720  |
| C | -7.78178411 | 2.41092882  | 5.27411375  | H | -0.33350518 | 5.79245197  | 0.63274448  |
| C | -7.64065840 | 1.08265931  | 4.86502542  | H | 0.58823431  | 4.37133538  | 0.10169774  |
| C | -6.47088611 | 0.66561692  | 4.23062970  | H | -1.17199824 | 4.27516381  | 0.23288435  |
| H | -6.36469714 | -0.37348222 | 3.92515222  | H | 0.76645953  | 4.71793620  | 2.56965962  |
| H | -8.44090575 | 0.36942344  | 5.04517375  | C | -1.35059136 | 4.68429235  | 3.01745612  |
| H | -8.69189438 | 2.73627335  | 5.77080823  | H | -1.24657713 | 4.34792537  | 4.05364906  |
| H | -6.84031073 | 4.34877383  | 5.36733937  | H | -1.45091294 | 5.77488117  | 3.01493864  |
| H | -4.76445294 | 3.60084225  | 4.24618526  | H | -2.27431839 | 4.25815735  | 2.61106608  |
| C | -3.36004059 | -1.93631020 | 1.61344770  | O | -0.05786001 | -1.45345891 | -1.45482288 |
| C | -2.88026966 | -3.30612355 | 2.00135381  | C | -0.68299082 | -2.72392702 | -1.21383401 |
| H | -3.07477331 | -4.05622882 | 1.21924568  | C | -2.02259974 | -2.68892297 | -1.98384817 |
| H | -1.80111576 | -3.29612395 | 2.18274011  | C | -1.85787189 | -1.49563036 | -2.96577566 |
| H | -3.37287556 | -3.67940372 | 2.91237094  | C | -0.38351249 | -1.10044736 | -2.80811739 |
| H | -4.42678749 | -1.80463642 | 1.45597970  | H | -0.17258899 | -0.03747110 | -2.92459747 |
| O | 0.09457032  | -0.84402685 | 4.42430426  | H | 0.25940653  | -1.67337491 | -3.49443228 |
| C | -0.87073989 | -0.55723728 | 5.45339974  | H | -2.50004114 | -0.66130734 | -2.66751625 |
| C | -1.70161614 | -1.83244050 | 5.56720965  | H | -2.10492170 | -1.75703402 | -3.99965511 |
| C | -0.62899323 | -2.92012986 | 5.37843462  | H | -2.85597173 | -2.52070729 | -1.29666196 |
| C | 0.36396492  | -2.26968905 | 4.39645262  | H | -2.20131982 | -3.63352525 | -2.50782509 |
| H | 0.21745317  | -2.60241483 | 3.36506067  | H | -0.02623284 | -3.52127854 | -1.59338183 |
| H | 1.40922108  | -2.43527941 | 4.67814807  | H | -0.79215007 | -2.82203996 | -0.13405136 |
| H | -1.03905061 | -3.85544420 | 4.98742719  |   |             |             |             |

**Table 54.** Geometric coordinates and thermally corrected MP2 energies for IRC derived products leading to (*R,S*)-6 from 5 spirocyclic dimer with three THF

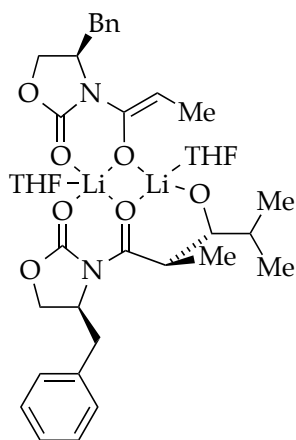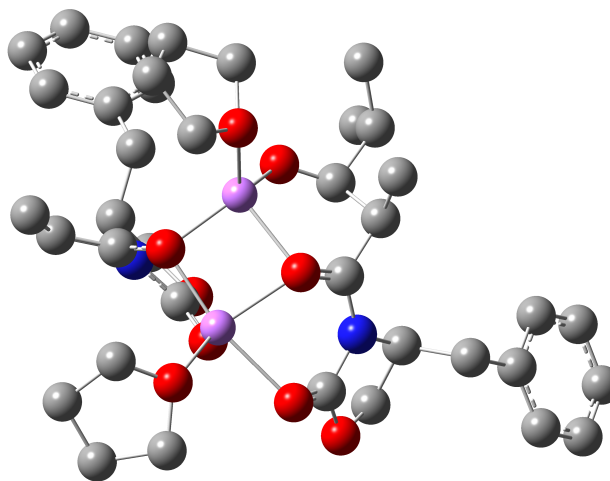

G = -2280.374161 Hartree

$G_{\text{MP2}} = -1426416.972$  kcal/mol

$\Delta G_{\text{MP2}} = -4.239659853$  kcal/mol vs. 5 spirocyclic dimer with three THF and isobutyraldehyde

$\Delta G_{\text{MP2}} = -8.754169492$  kcal/mol vs. 5 spirocyclic dimer transition state leading to (*R,S*)-6

| Atom | X          | Y          | Z           | Atom | X           | Y           | Z           |
|------|------------|------------|-------------|------|-------------|-------------|-------------|
| Li   | 0.0000000  | 0.0000000  | 0.0000000   | C    | 7.33112629  | 5.56653985  | -0.49305521 |
| Li   | 0.0000000  | 0.0000000  | 2.84477140  | C    | 6.56533357  | 4.40137500  | -0.57329759 |
| O    | 1.54430207 | 0.0000000  | 1.41373443  | H    | 6.47787089  | 3.87897819  | -1.52365150 |
| C    | 2.35848558 | 0.91665144 | 1.57912537  | H    | 7.82843241  | 5.94705198  | -1.38122853 |
| N    | 2.73069222 | 1.71909802 | 0.49563146  | H    | 8.05674507  | 7.14182006  | 0.78911713  |
| C    | 2.30519301 | 1.48474073 | -0.82467526 | H    | 6.92451875  | 6.24250119  | 2.81395717  |
| O    | 1.78226369 | 0.49137088 | -1.27186470 | H    | 5.57709553  | 4.17754047  | 2.67012960  |
| O    | 2.62733316 | 2.55633435 | -1.58067630 | C    | 2.87744172  | 1.26284464  | 2.93932595  |
| C    | 3.01688779 | 3.64577221 | -0.71622133 | H    | 3.75968523  | 1.90412413  | 2.85826327  |
| H    | 2.12938988 | 4.24948578 | -0.50465781 | C    | 3.25039466  | -0.00675973 | 3.71825446  |
| H    | 3.76726196 | 4.24081641 | -1.23675921 | H    | 3.93154346  | -0.64358152 | 3.14105632  |
| C    | 3.55060980 | 2.94637608 | 0.54057403  | H    | 3.75657358  | 0.26382410  | 4.64902278  |
| H    | 3.31215757 | 3.52465400 | 1.43420647  | H    | 2.36272336  | -0.59380938 | 3.96190320  |
| C    | 5.06528812 | 2.63830043 | 0.46967469  | O    | -1.33352179 | -0.25617434 | 1.45211927  |
| H    | 5.31664135 | 1.94883744 | 1.28374196  | C    | -2.42660794 | 0.45701774  | 1.40645809  |
| H    | 5.26648473 | 2.10555747 | -0.46757437 | N    | -2.21785925 | 1.90705878  | 1.36772933  |
| C    | 5.91849563 | 3.88653810 | 0.55785754  | C    | -2.86498909 | 2.85688733  | 2.28229372  |
| C    | 6.06093431 | 4.56704923 | 1.77649629  | C    | -2.20062346 | 4.18007305  | 1.83407249  |
| C    | 6.82353813 | 5.73144740 | 1.86025676  | H    | -2.87113502 | 4.79954880  | 1.22972130  |
| C    | 7.46039150 | 6.23591900 | 0.72394279  | H    | -1.82186605 | 4.77102952  | 2.66975751  |

|   |             |             |             |   |             |             |             |
|---|-------------|-------------|-------------|---|-------------|-------------|-------------|
| O | -1.08255286 | 3.79657402  | 1.00736262  | C | -1.98050998 | -0.71124312 | -3.26494967 |
| C | -1.17896249 | 2.47531465  | 0.71128447  | C | -0.52495135 | -0.97871621 | -2.84316906 |
| O | -0.39623349 | 1.95127651  | -0.08061403 | H | 0.15557884  | -0.13765058 | -2.96916185 |
| H | -3.94095942 | 2.89285417  | 2.08175361  | H | -0.11323499 | -1.85579164 | -3.36492148 |
| C | -2.63974895 | 2.49746255  | 3.76780879  | H | -2.20029802 | 0.35948587  | -3.21759345 |
| H | -3.01477846 | 1.47591876  | 3.90537117  | H | -2.17119538 | -1.04570717 | -4.28947829 |
| H | -1.56053880 | 2.47167478  | 3.96845449  | H | -3.47630533 | -0.80944907 | -1.66008677 |
| C | -3.37316677 | 3.43983980  | 4.69743231  | H | -3.44287647 | -2.26790900 | -2.66249486 |
| C | -2.69139316 | 4.43121068  | 5.41646328  | H | -1.51092807 | -3.12178572 | -1.55005169 |
| C | -3.37760498 | 5.31618062  | 6.25128916  | H | -2.02452144 | -2.04862155 | -0.21137287 |
| C | -4.76357039 | 5.22510223  | 6.38126087  |   |             |             |             |
| C | -5.45734860 | 4.23971971  | 5.67457204  |   |             |             |             |
| C | -4.76730987 | 3.35783411  | 4.84345462  |   |             |             |             |
| H | -5.31440484 | 2.58536524  | 4.30619295  |   |             |             |             |
| H | -6.53646817 | 4.15471269  | 5.77575688  |   |             |             |             |
| H | -5.29929364 | 5.91130450  | 7.03192622  |   |             |             |             |
| H | -2.82651997 | 6.07335543  | 6.80336725  |   |             |             |             |
| H | -1.60961900 | 4.49952358  | 5.33114446  |   |             |             |             |
| C | -3.71760755 | 0.04079962  | 1.42794701  |   |             |             |             |
| C | -4.14864319 | -1.38709536 | 1.60386975  |   |             |             |             |
| H | -4.63132556 | -1.79871844 | 0.70403316  |   |             |             |             |
| H | -3.29221468 | -2.02675859 | 1.83785861  |   |             |             |             |
| H | -4.87858493 | -1.49454538 | 2.41992640  |   |             |             |             |
| H | -4.49848015 | 0.78955815  | 1.32291987  |   |             |             |             |
| O | -0.06417969 | -1.61150471 | 4.05153251  |   |             |             |             |
| C | -0.35849433 | -1.35410424 | 5.43596072  |   |             |             |             |
| C | -1.80945654 | -1.80206356 | 5.59468066  |   |             |             |             |
| C | -1.86353497 | -3.06051476 | 4.70238168  |   |             |             |             |
| C | -0.75828084 | -2.81181163 | 3.64770543  |   |             |             |             |
| H | -1.14828209 | -2.61945738 | 2.64616691  |   |             |             |             |
| H | -0.04240536 | -3.64219159 | 3.60222383  |   |             |             |             |
| H | -2.84556948 | -3.20060282 | 4.24173376  |   |             |             |             |
| H | -1.64076852 | -3.95883302 | 5.28842905  |   |             |             |             |
| H | -2.48000656 | -1.02631541 | 5.20889707  |   |             |             |             |
| H | -2.08197156 | -2.00451914 | 6.63517050  |   |             |             |             |
| H | 0.31557865  | -1.94674674 | 6.07361331  |   |             |             |             |
| H | -0.17511719 | -0.29118086 | 5.60007221  |   |             |             |             |
| O | 0.54805382  | 1.47705929  | 3.77506286  |   |             |             |             |
| C | 1.70731455  | 2.14897879  | 3.64692487  |   |             |             |             |
| H | 1.61937003  | 3.02427221  | 2.95241784  |   |             |             |             |
| C | 2.26628377  | 2.76730792  | 4.98850060  |   |             |             |             |
| C | 1.73605301  | 4.19987121  | 5.15650660  |   |             |             |             |
| H | 2.07901873  | 4.65011944  | 6.09660316  |   |             |             |             |
| H | 2.05842219  | 4.85113734  | 4.33455944  |   |             |             |             |
| H | 0.63912011  | 4.19565383  | 5.16713530  |   |             |             |             |
| H | 3.36443961  | 2.82980889  | 4.91807767  |   |             |             |             |
| C | 1.90482099  | 1.93638788  | 6.22583760  |   |             |             |             |
| H | 2.26090935  | 0.90494461  | 6.15812298  |   |             |             |             |
| H | 2.33776823  | 2.38540440  | 7.12912533  |   |             |             |             |
| H | 0.81828625  | 1.90041437  | 6.34643325  |   |             |             |             |
| O | -0.59516642 | -1.26672011 | -1.43722059 |   |             |             |             |
| C | -1.76108350 | -2.08802057 | -1.26723147 |   |             |             |             |
| C | -2.82044825 | -1.48867544 | -2.21155235 |   |             |             |             |

**Table 55.** Geometric coordinates and thermally corrected MP2 energies for IRC derived reactants leading to (*S,R*)-**6** from **5** spirocyclic dimer with three THF

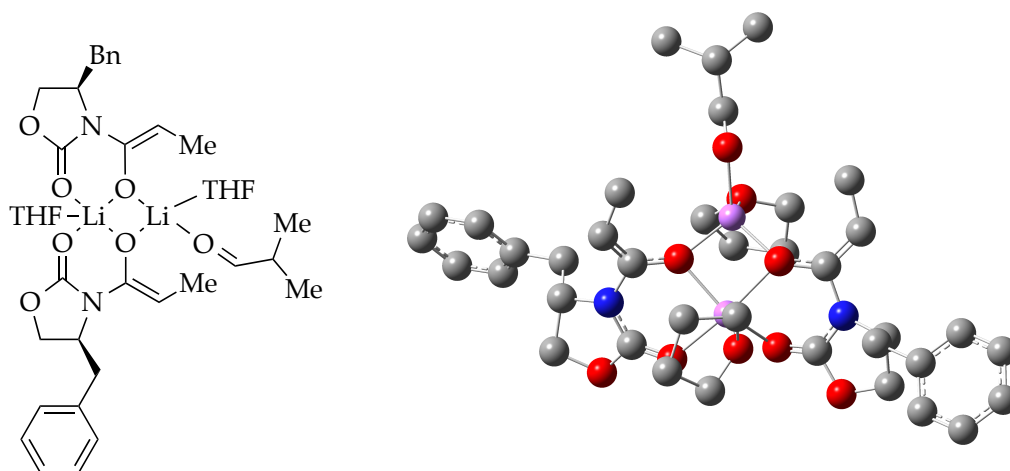

G = -2280.380075 Hartree

$G_{\text{MP2}} = -1426411.821$  kcal/mol

$\Delta G_{\text{MP2}} = -8.031894421$  kcal/mol vs. **5** spirocyclic dimer with three THF and isobutyraldehyde

$\Delta G_{\text{MP2}} = 0.911505828$  kcal/mol vs. **5** spirocyclic dimer transition state leading to (*S,R*)-**6**

| Atom | X          | Y           | Z           | Atom | X           | Y           | Z           |
|------|------------|-------------|-------------|------|-------------|-------------|-------------|
| Li   | 0.00000000 | 0.00000000  | 0.00000000  | C    | 8.57471154  | -1.41607854 | -2.39858573 |
| Li   | 0.00000000 | 0.00000000  | 2.67777070  | C    | 7.46748425  | -1.44364498 | -3.24683352 |
| O    | 1.43342210 | 0.00000000  | 1.48325479  | C    | 6.18668941  | -1.22513864 | -2.73454407 |
| C    | 2.64791298 | 0.44747378  | 1.41198983  | H    | 5.32714854  | -1.25937142 | -3.40074660 |
| N    | 3.04205417 | 0.99302765  | 0.11393971  | H    | 7.59784377  | -1.63914554 | -4.30814257 |
| C    | 2.16326243 | 1.48022009  | -0.81053694 | H    | 9.57212601  | -1.58761095 | -2.79451673 |
| O    | 0.95475157 | 1.64732066  | -0.71851164 | H    | 9.24749018  | -1.15759813 | -0.36501701 |
| O    | 2.82716768 | 1.80095624  | -1.96043711 | H    | 6.97545890  | -0.78028369 | 0.53735220  |
| C    | 4.24108263 | 1.68668340  | -1.72771900 | C    | 3.60228084  | 0.44146602  | 2.38319099  |
| H    | 4.64598941 | 2.68872823  | -1.54366659 | H    | 4.55412977  | 0.92654428  | 2.19059545  |
| H    | 4.70851403 | 1.26780932  | -2.62055526 | C    | 3.41079935  | -0.20429668 | 3.72632644  |
| C    | 4.36157429 | 0.78153879  | -0.49080137 | H    | 4.32181446  | -0.72545019 | 4.05202006  |
| H    | 5.15440051 | 1.14512897  | 0.16740516  | H    | 3.16546668  | 0.51616614  | 4.52599734  |
| C    | 4.60721987 | -0.71210480 | -0.81270394 | H    | 2.59928971  | -0.93865200 | 3.69660854  |
| H    | 4.45940474 | -1.26576113 | 0.12131928  | O    | -1.31375809 | -0.51054153 | 1.44752633  |
| H    | 3.83304849 | -1.04528101 | -1.51354708 | C    | -2.45963281 | -1.08871421 | 1.24975281  |
| C    | 5.98769203 | -0.97674423 | -1.36956363 | N    | -3.29174638 | -0.46321365 | 0.21751541  |
| C    | 7.11082096 | -0.95664230 | -0.52793382 | C    | -4.73197328 | -0.23136833 | 0.34279117  |
| C    | 8.39167298 | -1.17289281 | -1.03513644 | C    | -5.04943391 | 0.29024918  | -1.07127958 |



|   |              |             |             |   |             |             |             |
|---|--------------|-------------|-------------|---|-------------|-------------|-------------|
| H | -5.41687202  | -0.50708066 | -1.72753815 | H | -1.72530377 | 4.12805086  | 1.38629972  |
| H | -5.76084062  | 1.11819092  | -1.08071926 | H | -1.41753041 | 4.68873790  | 3.03801740  |
| O | -3.79223401  | 0.76118931  | -1.58507089 | H | 0.54208054  | 3.25659472  | 1.16555931  |
| C | -2.78073447  | 0.18289660  | -0.86922930 | H | 0.84590086  | 4.71938412  | 2.13562645  |
| O | -1.61859295  | 0.27546411  | -1.23346221 | H | 0.79478077  | 3.41821892  | 4.21904901  |
| H | -5.26066204  | -1.17049086 | 0.52675954  | H | 1.62705697  | 2.28076283  | 3.11491639  |
| C | -5.06173796  | 0.76325078  | 1.48085599  | O | 0.06785062  | -0.91077068 | 4.50138221  |
| H | -4.57609118  | 0.38328143  | 2.38721336  | C | -0.27270152 | -0.39974657 | 5.55538848  |
| H | -4.60178427  | 1.73021395  | 1.24256013  | H | -0.59581556 | 0.66049527  | 5.56213817  |
| C | -6.54786887  | 0.92678913  | 1.70921712  | C | -0.29732284 | -1.11635575 | 6.88082492  |
| C | -7.23098325  | 2.06841101  | 1.26895404  | H | 0.09328503  | -2.12639008 | 6.71367692  |
| C | -8.60867121  | 2.19900158  | 1.45737997  | C | -1.75698985 | -1.20115106 | 7.37173888  |
| C | -9.32754809  | 1.18511281  | 2.09097858  | H | -1.79547439 | -1.70309041 | 8.34452706  |
| C | -8.65922344  | 0.04264339  | 2.53795008  | H | -2.19419464 | -0.20242943 | 7.49327889  |
| C | -7.28335118  | -0.08295070 | 2.34894770  | H | -2.38132910 | -1.76555805 | 6.67098302  |
| H | -6.76811860  | -0.97120337 | 2.70917151  | C | 0.59720929  | -0.36811488 | 7.88727638  |
| H | -9.20982497  | -0.74937093 | 3.03905521  | H | 0.56658980  | -0.86926438 | 8.86072210  |
| H | -10.39929755 | 1.28508749  | 2.24005564  | H | 1.63978766  | -0.33833688 | 7.55304029  |
| H | -9.11782155  | 3.09486496  | 1.11154819  | H | 0.25525698  | 0.66411529  | 8.03218942  |
| H | -6.67602407  | 2.86841942  | 0.78330870  | O | 0.87981246  | -1.55151290 | -1.12096626 |
| C | -2.98946471  | -2.17524368 | 1.87029278  | C | 1.17745312  | -2.73754610 | -0.36776027 |
| C | -2.31799789  | -2.92787565 | 2.98245180  | C | -0.04979291 | -3.64012253 | -0.56043661 |
| H | -2.87103666  | -2.85687796 | 3.93386986  | C | -0.59140851 | -3.22290614 | -1.95619567 |
| H | -2.23844997  | -4.00115706 | 2.75496810  | C | 0.27345139  | -2.00303859 | -2.34273855 |
| H | -1.30743146  | -2.55226014 | 3.16147976  | H | -0.29143559 | -1.16440550 | -2.74981655 |
| H | -3.94905910  | -2.55060534 | 1.52587678  | H | 1.06690664  | -2.28887779 | -3.04973059 |
| O | -0.38091108  | 1.90906192  | 3.38902528  | H | -1.64819959 | -2.94837347 | -1.89354124 |
| C | 0.71045497   | 2.85238375  | 3.27843560  | H | -0.49917882 | -4.02372309 | -2.69705457 |
| C | 0.32335186   | 3.75771628  | 2.11378295  | H | -0.79435323 | -3.42963700 | 0.21244063  |
| C | -1.19542983  | 3.89522685  | 2.31451690  | H | 0.20989535  | -4.70222390 | -0.50589915 |
| C | -1.59638068  | 2.52020542  | 2.87751011  | H | 2.08713053  | -3.20609776 | -0.77633511 |
| H | -1.98842372  | 1.84490228  | 2.11289973  | H | 1.36416824  | -2.42210339 | 0.65943762  |
| H | -2.32319435  | 2.59547464  | 3.69563957  |   |             |             |             |

**Table 56.** Geometric coordinates and thermally corrected MP2 energies for IRC derived products leading to (*S,R*)-6 from 5 spirocyclic dimer with three THF

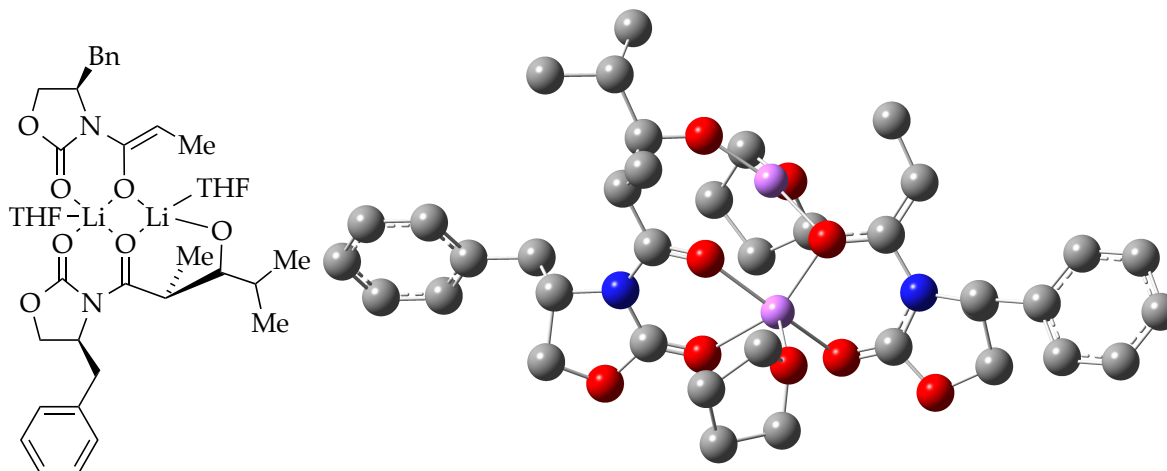

G = -2280.371513 Hartree

$G_{\text{MP2}} = -1426412.222$  kcal/mol

$\Delta G_{\text{MP2}} = 0.510486238$  kcal/mol vs. 5 spirocyclic dimer with three THF and isobutyraldehyde

$\Delta G_{\text{MP2}} = -8.432914011$  kcal/mol vs. 5 spirocyclic dimer transition state leading to (*S,R*)-6

| Atom | X          | Y           | Z           | Atom | X           | Y           | Z           |
|------|------------|-------------|-------------|------|-------------|-------------|-------------|
| Li   | 0.00000000 | 0.00000000  | 0.00000000  | C    | 8.03483529  | -1.01023867 | -2.28777201 |
| Li   | 0.00000000 | 0.00000000  | 2.96762440  | C    | 6.67187330  | -0.89366722 | -2.00556545 |
| O    | 1.20973113 | 0.00000000  | 1.49941207  | H    | 5.94688027  | -0.96515594 | -2.81384211 |
| C    | 2.42591324 | 0.45567154  | 1.56728997  | H    | 8.36242206  | -1.16370398 | -3.31281378 |
| N    | 2.95114065 | 1.03146497  | 0.33034103  | H    | 10.03258684 | -1.02652570 | -1.47349051 |
| C    | 2.18300772 | 1.48581955  | -0.69969144 | H    | 9.25807361  | -0.69587774 | 0.86814772  |
| O    | 0.96295004 | 1.57812013  | -0.78278577 | H    | 6.84187974  | -0.49960145 | 1.36195972  |
| O    | 2.97758118 | 1.86720323  | -1.74340134 | C    | 3.25901520  | 0.41389992  | 2.63916484  |
| C    | 4.35005495 | 1.84629852  | -1.31097091 | H    | 4.22726553  | 0.90058604  | 2.58701850  |
| H    | 4.65020003 | 2.86992607  | -1.05923922 | C    | 2.87677443  | -0.24460575 | 3.93632443  |
| H    | 4.96792095 | 1.48083652  | -2.13306717 | H    | 3.75369690  | -0.67793418 | 4.43468491  |
| C    | 4.35531506 | 0.92431033  | -0.08156261 | H    | 2.41566116  | 0.44866699  | 4.65771734  |
| H    | 5.01623694 | 1.32645185  | 0.68961552  | H    | 2.16258255  | -1.06235663 | 3.77308986  |
| C    | 4.74934354 | -0.54127648 | -0.38175175 | O    | -1.20723707 | -1.33690435 | 1.03812898  |
| H    | 4.47686041 | -1.12863177 | 0.50200307  | C    | -2.37199751 | -1.42647458 | 1.41313758  |
| H    | 4.13614871 | -0.90202322 | -1.21645584 | N    | -3.36377003 | -0.67268032 | 0.73143150  |
| C    | 6.22040936 | -0.70135089 | -0.69288611 | C    | -4.83263329 | -0.80353756 | 0.82010011  |
| C    | 7.17426515 | -0.63284720 | 0.33444032  | C    | -5.21477623 | -0.38473223 | -0.60799431 |
| C    | 8.53607288 | -0.74711183 | 0.05720095  | H    | -5.25193669 | -1.23461777 | -1.29823021 |
| C    | 8.97165246 | -0.93461848 | -1.25690402 | H    | -6.15067312 | 0.17142994  | -0.66055583 |

|   |              |             |             |   |             |             |             |
|---|--------------|-------------|-------------|---|-------------|-------------|-------------|
| O | -4.14497466  | 0.49126296  | -1.02069658 | C | -0.99954952 | -1.75412491 | -3.27415925 |
| C | -3.03028200  | 0.20819678  | -0.30387887 | C | 0.21004324  | -0.87598481 | -2.90565145 |
| O | -1.95117007  | 0.68988913  | -0.57092919 | H | 0.01656238  | 0.19714634  | -2.91444506 |
| H | -5.10533914  | -1.84415259 | 1.00661277  | H | 1.07100766  | -1.09191246 | -3.55605717 |
| C | -5.45324970  | 0.11195407  | 1.89980680  | H | -1.93153522 | -1.21169317 | -3.09077217 |
| H | -4.97129535  | -0.11344369 | 2.85669655  | H | -0.98396061 | -2.03971915 | -4.33045468 |
| H | -5.20297932  | 1.15181709  | 1.65582913  | H | -1.75925542 | -3.06584103 | -1.68413718 |
| C | -6.95417303  | -0.05675616 | 2.01028935  | H | -0.76208167 | -3.92202513 | -2.86293368 |
| C | -7.83257585  | 0.90437105  | 1.49233410  | H | 1.26772385  | -3.15132903 | -1.88542710 |
| C | -9.21587571  | 0.73228657  | 1.57858063  | H | 0.27676467  | -2.91357128 | -0.41716108 |
| C | -9.74209779  | -0.40816019 | 2.18561518  |   |             |             |             |
| C | -8.87777076  | -1.37172448 | 2.71071128  |   |             |             |             |
| C | -7.49702974  | -1.19598501 | 2.62398811  |   |             |             |             |
| H | -6.83243304  | -1.94433681 | 3.05093260  |   |             |             |             |
| H | -9.27914528  | -2.25775912 | 3.19528658  |   |             |             |             |
| H | -10.81790689 | -0.54299214 | 2.25616562  |   |             |             |             |
| H | -9.87994491  | 1.49227435  | 1.17560536  |   |             |             |             |
| H | -7.43019002  | 1.80355468  | 1.03038940  |   |             |             |             |
| C | -2.75667148  | -2.25762889 | 2.59096415  |   |             |             |             |
| C | -1.90746174  | -3.53596289 | 2.62649127  |   |             |             |             |
| H | -2.28519119  | -4.22340596 | 3.38874466  |   |             |             |             |
| H | -1.92000699  | -4.06211104 | 1.66469585  |   |             |             |             |
| H | -0.87313665  | -3.28049949 | 2.86733602  |   |             |             |             |
| H | -3.82210362  | -2.50328019 | 2.56336192  |   |             |             |             |
| O | -0.16129050  | 1.96544110  | 3.42139786  |   |             |             |             |
| C | -1.19246989  | 2.34715024  | 4.34581257  |   |             |             |             |
| C | -2.20778241  | 3.16585440  | 3.51798852  |   |             |             |             |
| C | -1.41765676  | 3.56528233  | 2.23992897  |   |             |             |             |
| C | 0.00951334   | 3.07238541  | 2.52652170  |   |             |             |             |
| H | 0.61080690   | 3.85013807  | 3.02166894  |   |             |             |             |
| H | 0.54021936   | 2.70700218  | 1.64737377  |   |             |             |             |
| H | -1.44636547  | 4.64127002  | 2.04163182  |   |             |             |             |
| H | -1.81645710  | 3.05400927  | 1.35849249  |   |             |             |             |
| H | -2.56343914  | 4.03736537  | 4.07682906  |   |             |             |             |
| H | -3.08338533  | 2.56046070  | 3.26359285  |   |             |             |             |
| H | -1.58196003  | 1.41869794  | 4.76457391  |   |             |             |             |
| H | -0.74807400  | 2.96094187  | 5.14348897  |   |             |             |             |
| O | -1.24412064  | -0.83913395 | 3.93517454  |   |             |             |             |
| C | -2.48384286  | -1.33581565 | 3.92068862  |   |             |             |             |
| H | -3.27470338  | -0.54092854 | 3.85802550  |   |             |             |             |
| C | -2.83876306  | -2.15012373 | 5.20887025  |   |             |             |             |
| H | -2.11819965  | -2.97586145 | 5.27686564  |   |             |             |             |
| C | -4.26243058  | -2.72623044 | 5.21802099  |   |             |             |             |
| H | -4.49172027  | -3.18599888 | 6.18716846  |   |             |             |             |
| H | -5.00818667  | -1.93484893 | 5.05474608  |   |             |             |             |
| H | -4.41496356  | -3.49710965 | 4.45298301  |   |             |             |             |
| C | -2.62162332  | -1.24931106 | 6.43303198  |   |             |             |             |
| H | -2.78731313  | -1.80256332 | 7.36608327  |   |             |             |             |
| H | -1.60422218  | -0.85207352 | 6.43218203  |   |             |             |             |
| H | -3.32060872  | -0.40041889 | 6.42285747  |   |             |             |             |
| O | 0.53910034   | -1.23857506 | -1.55634005 |   |             |             |             |
| C | 0.37346967   | -2.66020649 | -1.47350483 |   |             |             |             |
| C | -0.87441010  | -2.97751235 | -2.32176913 |   |             |             |             |

**Table 57.** Geometric coordinates and thermally corrected MP2 energies for IRC derived reactants leading to (*R,R*)-6 from 5 spirocyclic dimer with three THF

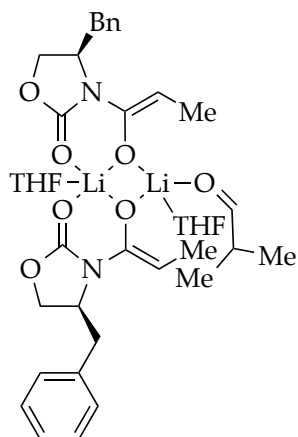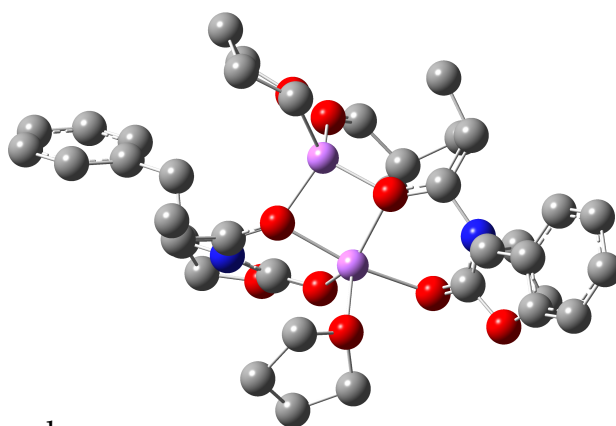

G = -2280.380525 Hartree

G<sub>MP2</sub> = -1426413.372 kcal/mol

ΔG<sub>MP2</sub> = -0.639321011 kcal/mol vs. 5 spirocyclic dimer with three THF and isobutyraldehyde

ΔG<sub>MP2</sub> = -5.642332213 kcal/mol vs. 5 spirocyclic dimer transition state leading to (*R,R*)-6

| Atom | X          | Y           | Z           | Atom | X          | Y           | Z           |
|------|------------|-------------|-------------|------|------------|-------------|-------------|
| Li   | 0.00000000 | 0.00000000  | 0.00000000  | C    | 7.41153682 | -0.91813345 | -1.98686886 |
| O    | 0.00000000 | 0.00000000  | 2.01174800  | H    | 7.16578252 | 0.14186747  | -1.97365115 |
| Li   | 1.86084650 | 0.00000000  | 1.87282299  | H    | 9.36224538 | -0.59747643 | -2.83741000 |
| O    | 1.93011052 | 0.70440738  | 0.13427013  | H    | 9.95056313 | -3.01537690 | -2.85155079 |
| C    | 2.79511431 | 0.77254727  | -0.82737329 | H    | 8.31738796 | -4.68284440 | -1.98953440 |
| N    | 2.90597569 | -0.43471908 | -1.65145860 | H    | 6.12022850 | -3.93865202 | -1.12878895 |
| C    | 4.17217886 | -0.97368755 | -2.15596898 | C    | 3.61306254 | 1.80999716  | -1.15167085 |
| C    | 3.65274258 | -2.14983180 | -3.00203070 | C    | 3.66191774 | 3.09159056  | -0.37006261 |
| H    | 3.54190250 | -1.87830078 | -4.05797822 | H    | 3.33971563 | 3.95958824  | -0.96568313 |
| H    | 4.27021357 | -3.04651515 | -2.92442535 | H    | 3.00251962 | 3.02732370  | 0.50089296  |
| O    | 2.34975406 | -2.44158342 | -2.46789080 | H    | 4.67633475 | 3.32623873  | -0.01100985 |
| C    | 1.89699308 | -1.34110215 | -1.78715340 | H    | 4.24458929 | 1.73213292  | -2.03184845 |
| O    | 0.73778813 | -1.28038256 | -1.40577723 | O    | 2.99177472 | 1.00539213  | 3.18123235  |
| H    | 4.67516475 | -0.24286961 | -2.79512131 | C    | 4.43216484 | 0.93579620  | 3.13286184  |
| C    | 5.12441498 | -1.38602998 | -1.00853119 | C    | 4.91535469 | 2.07602833  | 4.02751771  |
| H    | 5.23340580 | -0.51332667 | -0.35496813 | C    | 3.85083481 | 3.15245508  | 3.75952398  |
| H    | 4.64068415 | -2.17326583 | -0.41800795 | C    | 2.56866008 | 2.32329004  | 3.60858094  |
| C    | 6.47742270 | -1.84697520 | -1.50265108 | H    | 1.87681077 | 2.72386422  | 2.86194816  |
| C    | 6.82529656 | -3.20443738 | -1.51313803 | H    | 2.03400781 | 2.21107531  | 4.55866441  |
| C    | 8.06680104 | -3.62519630 | -1.99501432 | H    | 4.07623111 | 3.68071145  | 2.82661736  |
| C    | 8.98336860 | -2.69071708 | -2.47743264 | H    | 3.77276691 | 3.89413143  | 4.56005228  |
| C    | 8.65164708 | -1.33367627 | -2.47055892 | H    | 5.93066325 | 2.40193480  | 3.78198134  |

|   |             |             |             |   |             |             |             |
|---|-------------|-------------|-------------|---|-------------|-------------|-------------|
| H | 4.89824622  | 1.76809742  | 5.07972231  | C | -4.45550935 | 2.70788131  | 4.93562946  |
| H | 4.72818288  | -0.05958395 | 3.47304248  | C | -5.50054761 | 3.37474238  | 5.57422285  |
| H | 4.76397854  | 1.07164184  | 2.09458208  | C | -6.43176721 | 4.09913230  | 4.82605379  |
| O | 2.65196940  | -1.88371427 | 2.10484877  | C | -6.30656801 | 4.15253303  | 3.43760609  |
| C | 2.21540201  | -3.02296519 | 2.04131448  | C | -5.25874601 | 3.48237267  | 2.80232764  |
| H | 2.85910037  | -3.85593685 | 2.40168291  | H | -5.16083718 | 3.53845948  | 1.72016665  |
| C | 0.87010120  | -3.44832282 | 1.52252570  | H | -7.02153789 | 4.71926227  | 2.84666759  |
| H | 0.35422290  | -2.57207716 | 1.12224465  | H | -7.24498821 | 4.62151315  | 5.32283341  |
| C | 1.06698500  | -4.49647952 | 0.40934280  | H | -5.58556244 | 3.33385849  | 6.65716680  |
| H | 0.08817076  | -4.83544109 | 0.05536551  | H | -3.72779045 | 2.15434699  | 5.52573492  |
| H | 1.60156444  | -4.08097321 | -0.45021399 | C | -0.93857102 | -0.54116212 | 4.15672810  |
| H | 1.61496389  | -5.37406649 | 0.77743208  | H | -1.87127342 | -0.79886030 | 4.65109291  |
| C | 0.05490419  | -4.02592811 | 2.70021309  | C | 0.30003752  | -0.52849787 | 5.00609064  |
| H | -0.17567577 | -3.24979444 | 3.43640375  | H | 0.20886690  | 0.16608925  | 5.85611573  |
| H | -0.89231211 | -4.42422605 | 2.32101668  | H | 0.51480921  | -1.51632708 | 5.44394381  |
| H | 0.58826325  | -4.84724001 | 3.19687128  | H | 1.18203492  | -0.23124243 | 4.43211844  |
| C | -0.97451728 | -0.26976344 | 2.82435745  | O | -0.98452108 | 1.56327495  | -0.93496688 |
| N | -2.30882795 | -0.24423022 | 2.22064928  | C | -0.30283257 | 2.80856424  | -1.15569883 |
| C | -2.55571346 | -0.59095491 | 0.92684116  | C | 0.08236845  | 2.82699627  | -2.65340650 |
| O | -1.79144910 | -1.06672668 | 0.09927557  | C | -0.75373192 | 1.67282774  | -3.26983989 |
| O | -3.86292573 | -0.33173154 | 0.61627760  | C | -1.71476214 | 1.28374611  | -2.13987291 |
| C | -4.55836226 | 0.03888024  | 1.81982363  | H | -1.99227850 | 0.22991611  | -2.11131699 |
| H | -5.11080975 | -0.83452504 | 2.18525975  | H | -2.62781158 | 1.89927216  | -2.16073364 |
| H | -5.26359266 | 0.83742463  | 1.58235875  | H | -0.11179074 | 0.82151780  | -3.51510149 |
| C | -3.45076031 | 0.46788478  | 2.79817635  | H | -1.28461430 | 1.96948605  | -4.18005483 |
| H | -3.66815321 | 0.10121432  | 3.80477245  | H | 1.15361457  | 2.64945494  | -2.77914926 |
| C | -3.20045787 | 1.99388776  | 2.85700402  | H | -0.15494628 | 3.79450304  | -3.10795625 |
| H | -2.25748117 | 2.14065316  | 3.39615941  | H | -0.98389098 | 3.63681809  | -0.90900735 |
| H | -3.05032233 | 2.36176369  | 1.83493276  | H | 0.55161358  | 2.82429716  | -0.47889121 |
| C | -4.31910255 | 2.74884628  | 3.53935130  |   |             |             |             |

**Table 58.** Geometric coordinates and thermally corrected MP2 energies for IRC derived products leading to (*R,R*)-6 from 5 spirocyclic dimer with three THF

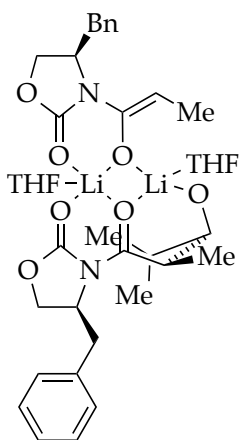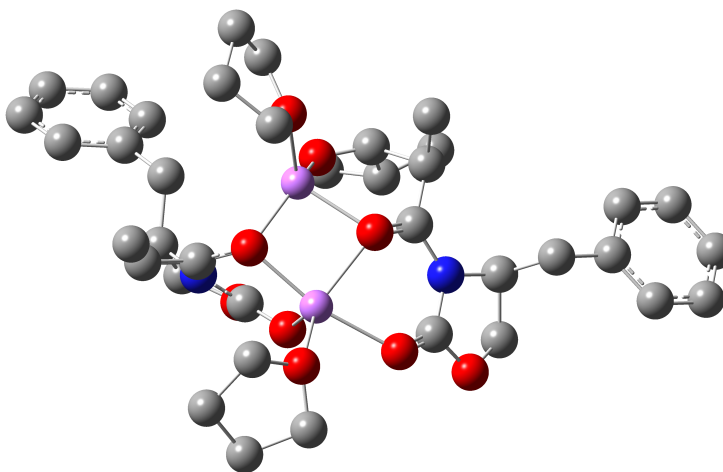

G = -2280.373456 Hartree

$G_{\text{MP2}} = -1426416.164$  kcal/mol

$\Delta G_{\text{MP2}} = -3.430739718$  kcal/mol vs. 5 spirocyclic dimer with three THF and isobutyraldehyde

$\Delta G_{\text{MP2}} = -8.43375092$  kcal/mol vs. 5 spirocyclic dimer transition state leading to (*R,R*)-6

| Atom | X          | Y           | Z           | Atom | X          | Y           | Z           |
|------|------------|-------------|-------------|------|------------|-------------|-------------|
| Li   | 0.00000000 | 0.00000000  | 0.00000000  | C    | 8.30462489 | -4.49805993 | 0.79706434  |
| O    | 0.00000000 | 0.00000000  | 2.12543790  | C    | 8.23185188 | -3.43527426 | -0.10671542 |
| Li   | 2.04916736 | 0.00000000  | 1.95416917  | C    | 7.08012183 | -2.65176509 | -0.17413266 |
| O    | 1.93739436 | 0.47147093  | 0.07311467  | H    | 7.03698831 | -1.81821735 | -0.87273325 |
| C    | 2.73677792 | -0.07505910 | -0.80157827 | H    | 9.07534168 | -3.21330547 | -0.75578698 |
| N    | 2.71034875 | -1.53844209 | -0.83383772 | H    | 9.20232062 | -5.10827772 | 0.85270085  |
| C    | 3.90860545 | -2.37856997 | -0.72540648 | H    | 7.26869084 | -5.58456916 | 2.34489370  |
| C    | 3.26780313 | -3.78303269 | -0.77488994 | H    | 5.22994717 | -4.18371214 | 2.22297533  |
| H    | 3.35620267 | -4.24250304 | -1.76520058 | C    | 3.61083254 | 0.52481362  | -1.64939093 |
| H    | 3.66941030 | -4.46577435 | -0.02445862 | C    | 3.88988116 | 2.00019573  | -1.67801056 |
| O    | 1.86822071 | -3.57937205 | -0.49949701 | H    | 3.56347065 | 2.47576954  | -2.61595605 |
| C    | 1.57789243 | -2.25719013 | -0.61729536 | H    | 3.37629230 | 2.50950449  | -0.85696016 |
| O    | 0.41872433 | -1.85621195 | -0.55084236 | H    | 4.96506984 | 2.21536033  | -1.58389109 |
| H    | 4.55238472 | -2.23222337 | -1.59846329 | H    | 4.15721608 | -0.10170485 | -2.34965125 |
| C    | 4.72134161 | -2.07434229 | 0.55520701  | O    | 2.97610434 | 1.55778127  | 2.84400869  |
| H    | 4.98662750 | -1.01061076 | 0.51055421  | C    | 4.23505609 | 1.37006537  | 3.53217122  |
| H    | 4.07600886 | -2.20838276 | 1.43219042  | C    | 4.93493389 | 2.73466568  | 3.50653736  |
| C    | 5.97763196 | -2.91190271 | 0.65530155  | C    | 4.34630212 | 3.38499071  | 2.24356885  |
| C    | 6.06728177 | -3.97859022 | 1.56063511  | C    | 2.90325690 | 2.88368123  | 2.28039468  |
| C    | 7.21939555 | -4.76513782 | 1.63215223  | H    | 2.43113135 | 2.79084455  | 1.30017259  |

|   |             |             |             |   |             |             |             |
|---|-------------|-------------|-------------|---|-------------|-------------|-------------|
| H | 2.27684002  | 3.51393571  | 2.92777268  | C | -0.86646115 | 0.64489453  | -3.70024175 |
| H | 4.85271565  | 3.01230821  | 1.34583365  | C | -1.67629215 | 0.82055794  | -2.40481260 |
| H | 4.41381548  | 4.47731626  | 2.24717435  | H | -2.13720689 | -0.08974270 | -2.02292344 |
| H | 6.02476587  | 2.64117614  | 3.47894567  | H | -2.45047839 | 1.59469551  | -2.51980636 |
| H | 4.66889289  | 3.32107835  | 4.39417630  | H | -0.50925339 | -0.38567862 | -3.78586231 |
| H | 4.02667700  | 1.00251683  | 4.54120196  | H | -1.46889170 | 0.86484426  | -4.58727410 |
| H | 4.80733507  | 0.60353716  | 2.99760599  | H | 1.28079164  | 1.09199671  | -3.58280782 |
| O | 2.24516378  | -1.55450362 | 2.88133053  | H | 0.33483182  | 2.41648236  | -4.27992069 |
| C | 1.50553416  | -2.06327369 | 3.87802306  | H | -0.38162424 | 3.17580179  | -2.14103448 |
| H | 2.02408192  | -2.02705485 | 4.86965276  | H | 1.04154869  | 2.28171686  | -1.52299185 |
| C | 1.09075138  | -3.56341502 | 3.68198741  |   |             |             |             |
| H | 0.29514253  | -3.60735540 | 2.92076821  |   |             |             |             |
| C | 2.27661815  | -4.36834857 | 3.13721512  |   |             |             |             |
| H | 2.00575204  | -5.42297589 | 2.99876294  |   |             |             |             |
| H | 2.59735164  | -3.95808657 | 2.17966305  |   |             |             |             |
| H | 3.12535947  | -4.32618689 | 3.83347711  |   |             |             |             |
| C | 0.58934687  | -4.22079442 | 4.97952156  |   |             |             |             |
| H | -0.28527050 | -3.72339974 | 5.41793070  |   |             |             |             |
| H | 0.31354410  | -5.26909533 | 4.81069869  |   |             |             |             |
| H | 1.37841149  | -4.20889813 | 5.74274263  |   |             |             |             |
| C | -0.49355754 | -0.81702567 | 2.90949540  |   |             |             |             |
| N | -1.65462504 | -1.51549992 | 2.53336384  |   |             |             |             |
| C | -2.29531710 | -1.33437344 | 1.29650191  |   |             |             |             |
| O | -2.02165618 | -0.55892178 | 0.41145994  |   |             |             |             |
| O | -3.35045934 | -2.17822798 | 1.22297959  |   |             |             |             |
| C | -3.30107575 | -3.10764674 | 2.32419269  |   |             |             |             |
| H | -2.80792792 | -4.02290658 | 1.98161394  |   |             |             |             |
| H | -4.32335327 | -3.32904200 | 2.63144024  |   |             |             |             |
| C | -2.48483693 | -2.37782282 | 3.39780855  |   |             |             |             |
| H | -1.86176546 | -3.08273977 | 3.94721560  |   |             |             |             |
| C | -3.35390156 | -1.54263528 | 4.36935923  |   |             |             |             |
| H | -2.68757742 | -0.90155622 | 4.95809694  |   |             |             |             |
| H | -3.99134752 | -0.87613390 | 3.77571338  |   |             |             |             |
| C | -4.20157349 | -2.39893580 | 5.28653783  |   |             |             |             |
| C | -3.62005939 | -3.07802871 | 6.36764982  |   |             |             |             |
| C | -4.39024270 | -3.88866612 | 7.20082828  |   |             |             |             |
| C | -5.76000163 | -4.03258695 | 6.96830082  |   |             |             |             |
| C | -6.35247407 | -3.35832430 | 5.90040699  |   |             |             |             |
| C | -5.57753635 | -2.54858800 | 5.06730719  |   |             |             |             |
| H | -6.04928666 | -2.01621147 | 4.24398420  |   |             |             |             |
| H | -7.41884601 | -3.45718441 | 5.71607299  |   |             |             |             |
| H | -6.36115273 | -4.66181733 | 7.61882723  |   |             |             |             |
| H | -3.92162070 | -4.40408277 | 8.03485447  |   |             |             |             |
| H | -2.55622716 | -2.96364913 | 6.56562315  |   |             |             |             |
| C | 0.17245388  | -1.15038074 | 4.20359120  |   |             |             |             |
| H | -0.48930293 | -1.72834891 | 4.85077631  |   |             |             |             |
| C | 0.59705122  | 0.12453838  | 4.95041563  |   |             |             |             |
| H | -0.25976761 | 0.77197342  | 5.17692348  |   |             |             |             |
| H | 1.06682453  | -0.15789134 | 5.89914028  |   |             |             |             |
| H | 1.31820272  | 0.70235251  | 4.36854169  |   |             |             |             |
| O | -0.71934975 | 1.26001359  | -1.42847220 |   |             |             |             |
| C | 0.12650176  | 2.19992570  | -2.10785578 |   |             |             |             |
| C | 0.32806150  | 1.62467026  | -3.52410531 |   |             |             |             |

**Table 59.** Geometric coordinates and thermally corrected MP2 energies for IRC derived reactants leading to (*S,S*)-**6** from **5** spirocyclic dimer with three THF

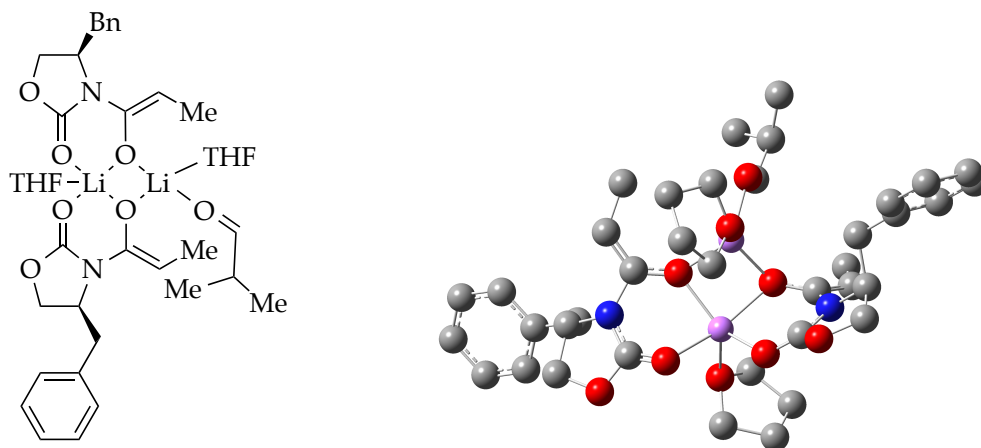

G = -2280.378761 Hartree

G<sub>MP2</sub> = -1426412.247 kcal/mol

ΔG<sub>MP2</sub> = 0.485882721 kcal/mol vs. **5** spirocyclic dimer with three THF and isobutyraldehyde

ΔG<sub>MP2</sub> = -11.50745307 kcal/mol vs. **5** spirocyclic dimer transition state leading to (*S,S*)-**6**

| Atom | X          | Y           | Z           | Atom | X           | Y           | Z           |
|------|------------|-------------|-------------|------|-------------|-------------|-------------|
| Li   | 0.00000000 | 0.00000000  | 0.00000000  | C    | 7.49005228  | -2.53653890 | -2.65036249 |
| Li   | 0.00000000 | 0.00000000  | 2.60954310  | C    | 6.20917028  | -2.13897652 | -2.26053025 |
| O    | 1.45537568 | 0.00000000  | 1.42937248  | H    | 5.38203964  | -2.22387242 | -2.96232018 |
| C    | 2.66906501 | 0.45379665  | 1.36482268  | H    | 7.65356497  | -2.92087982 | -3.65391026 |
| N    | 3.14800567 | 0.76754215  | 0.01717431  | H    | 9.55177964  | -2.75550413 | -2.05351468 |
| C    | 2.33358053 | 1.15916615  | -1.00311621 | H    | 9.14985943  | -1.89097677 | 0.24501075  |
| O    | 1.14145759 | 1.42998191  | -0.97681488 | H    | 6.87654014  | -1.19658676 | 0.93169019  |
| O    | 3.04539115 | 1.22653210  | -2.16900711 | C    | 3.57305204  | 0.63447170  | 2.36616484  |
| C    | 4.44038843 | 1.04497124  | -1.86946410 | H    | 4.52933759  | 1.08795744  | 2.12198743  |
| H    | 4.92097623 | 2.02972183  | -1.83962620 | C    | 3.35553471  | 0.23021869  | 3.79551826  |
| H    | 4.89169277 | 0.44757380  | -2.66379941 | H    | 4.17861002  | -0.39787516 | 4.16966220  |
| C    | 4.45877439 | 0.35515929  | -0.49468979 | H    | 3.29309953  | 1.08992426  | 4.48202348  |
| H    | 5.26285693 | 0.76185717  | 0.12364363  | H    | 2.42985775  | -0.34077225 | 3.90782730  |
| C    | 4.58949926 | -1.18542163 | -0.55143685 | O    | -1.12710122 | -0.97971025 | 1.43883156  |
| H    | 4.34994845 | -1.56123532 | 0.44978792  | C    | -2.41396201 | -1.14356814 | 1.37144551  |
| H    | 3.82669625 | -1.57531494 | -1.23602042 | N    | -3.18480806 | 0.07480076  | 1.10715401  |
| C    | 5.96756473 | -1.64544342 | -0.97128929 | C    | -4.32473702 | 0.51983960  | 1.91273258  |
| C    | 7.04733338 | -1.56391429 | -0.07831598 | C    | -4.71185160 | 1.79998468  | 1.14694074  |
| C    | 8.32820361 | -1.95817493 | -0.46355172 | H    | -5.51592418 | 1.61693921  | 0.42528739  |
| C    | 8.55451175 | -2.44522596 | -1.75325031 | H    | -4.99594970 | 2.62781456  | 1.79900126  |



|   |             |             |             |   |             |             |             |
|---|-------------|-------------|-------------|---|-------------|-------------|-------------|
| O | -3.52651918 | 2.17462942  | 0.42103735  | H | 2.03852771  | 3.04677352  | 3.72140760  |
| C | -2.70604676 | 1.08346409  | 0.32888856  | H | -0.41374675 | 4.82858982  | 3.25797602  |
| O | -1.70758930 | 1.10121043  | -0.37649414 | H | 1.01519742  | 4.69477661  | 2.22028647  |
| H | -5.13830029 | -0.20998284 | 1.86546650  | H | 0.33012893  | 2.54180537  | 1.37428184  |
| C | -3.93318944 | 0.74450863  | 3.39275753  | H | -1.28676627 | 3.15762460  | 1.77871135  |
| H | -3.51242093 | -0.20014877 | 3.75668043  | O | 0.01109994  | -1.08693099 | 4.34451246  |
| H | -3.12878378 | 1.48763747  | 3.43587433  | C | 0.12061393  | -2.29071519 | 4.16286438  |
| C | -5.10338199 | 1.16442069  | 4.25368569  | C | 0.06585612  | -3.33082964 | 5.25349969  |
| C | -5.25461399 | 2.49250859  | 4.67551573  | H | -0.77696465 | -3.98447257 | 4.97105747  |
| C | -6.35185455 | 2.88237245  | 5.44654639  | C | 1.34808253  | -4.18938918 | 5.18779111  |
| C | -7.32041322 | 1.94603908  | 5.80909753  | H | 1.27362851  | -5.02935442 | 5.88566771  |
| C | -7.18151584 | 0.61779099  | 5.39932441  | H | 1.51202851  | -4.59778766 | 4.18414052  |
| C | -6.08337857 | 0.23306691  | 4.63055319  | H | 2.22824928  | -3.59701938 | 5.46256647  |
| H | -5.97719020 | -0.80606856 | 4.32521155  | C | -0.18504337 | -2.73409127 | 6.63888879  |
| H | -7.92706713 | -0.12048070 | 5.68345622  | H | -1.10261884 | -2.13845100 | 6.65551238  |
| H | -8.17433205 | 2.24653947  | 6.41029697  | H | -0.27593531 | -3.53075126 | 7.38482342  |
| H | -6.44648633 | 3.91698270  | 5.76621338  | H | 0.64099223  | -2.07980930 | 6.93737815  |
| H | -4.49788400 | 3.22631940  | 4.40592745  | H | 0.27359327  | -2.66868532 | 3.13571275  |
| C | -3.13785065 | -2.28267854 | 1.52792739  | O | 0.20306530  | -1.32174446 | -1.55466914 |
| C | -2.54398697 | -3.61758088 | 1.87541393  | C | -0.33402652 | -2.64759281 | -1.41687450 |
| H | -2.82952691 | -3.96302407 | 2.88312433  | C | -1.67718596 | -2.64847602 | -2.18299175 |
| H | -2.86923691 | -4.40456836 | 1.17992478  | C | -1.62758890 | -1.34654106 | -3.02798257 |
| H | -1.45111463 | -3.57653842 | 1.83516282  | C | -0.18113480 | -0.86596263 | -2.86304913 |
| H | -4.21388529 | -2.23477330 | 1.38407009  | H | -0.05189442 | 0.21630755  | -2.87714564 |
| O | -0.42583441 | 1.89319656  | 3.19218118  | H | 0.48384949  | -1.32300569 | -3.61258854 |
| C | -0.29348631 | 2.93797959  | 2.17908861  | H | -2.30828892 | -0.59635529 | -2.61652088 |
| C | 0.35177782  | 4.13635845  | 2.88692196  | H | -1.89155989 | -1.50962390 | -4.07774710 |
| C | 1.09007926  | 3.47676513  | 4.06192831  | H | -2.51953226 | -2.63392439 | -1.48649439 |
| C | 0.11981146  | 2.36164472  | 4.44394005  | H | -1.77101886 | -3.54244463 | -2.80826208 |
| H | -0.69717329 | 2.73849699  | 5.07673792  | H | 0.37543791  | -3.36641447 | -1.85325461 |
| H | 0.58635792  | 1.51021959  | 4.94488452  | H | -0.43383873 | -2.83855203 | -0.34795568 |
| H | 1.29141282  | 4.16330149  | 4.89039793  |   |             |             |             |

**Table 60.** Geometric coordinates and thermally corrected MP2 energies for IRC derived products leading to (*S,S*)-6 from 5 spirocyclic dimer with three THF

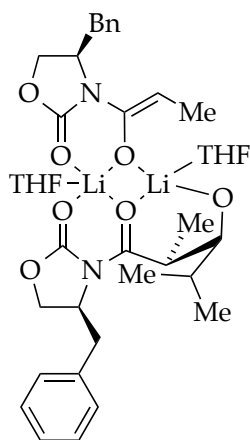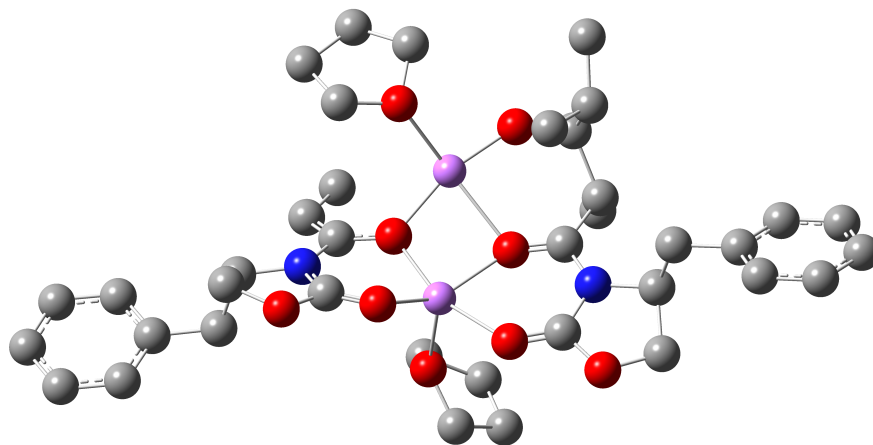

G = -2280.362701 Hartree

G<sub>MP2</sub> = -1426406.197 kcal/mol

ΔG<sub>MP2</sub> = 6.535766459 kcal/mol vs. 5 spirocyclic dimer with three THF and isobutyraldehyde

ΔG<sub>MP2</sub> = -5.45756933 kcal/mol vs. 5 spirocyclic dimer transition state leading to (*S,S*)-6

| Atom | X          | Y          | Z           | Atom | X           | Y           | Z           |
|------|------------|------------|-------------|------|-------------|-------------|-------------|
| Li   | 0.00000000 | 0.00000000 | 0.00000000  | C    | 6.68537602  | 2.15266926  | -2.24043963 |
| Li   | 0.00000000 | 0.00000000 | 2.96561520  | H    | 5.93943843  | 2.25555128  | -3.02579189 |
| O    | 1.26203026 | 0.00000000 | 1.49991689  | H    | 8.23547178  | 3.09774374  | -3.39890771 |
| C    | 2.51250755 | 0.33479227 | 1.40466470  | H    | 9.96039343  | 2.84998366  | -1.62234087 |
| N    | 2.78775689 | 1.42031407 | 0.46463906  | H    | 9.36196642  | 1.74630647  | 0.52617949  |
| C    | 1.86313844 | 2.01509641 | -0.35585789 | H    | 7.06799923  | 0.90509554  | 0.89461201  |
| O    | 0.69655114 | 1.72374661 | -0.57781443 | C    | 3.55970929  | -0.20497761 | 2.08822361  |
| O    | 2.43625980 | 3.07539561 | -0.99913286 | H    | 4.56733579  | 0.15869360  | 1.92375619  |
| C    | 3.73957365 | 3.30760483 | -0.43754081 | C    | 3.39429724  | -1.31953041 | 3.08357651  |
| H    | 3.66167537 | 4.09948033 | 0.31693538  | H    | 4.00862479  | -2.19623296 | 2.82749848  |
| H    | 4.40827488 | 3.63095630 | -1.23679279 | H    | 3.69044953  | -1.02352974 | 4.10175418  |
| C    | 4.12348556 | 1.95741681 | 0.17918341  | H    | 2.35194026  | -1.64969133 | 3.13139916  |
| H    | 4.67819270 | 2.09481086 | 1.11060465  | O    | -1.28395383 | -0.83397377 | 1.30898904  |
| C    | 4.92012612 | 1.04609730 | -0.78900116 | C    | -2.46799626 | -1.12361295 | 1.47266621  |
| H    | 4.92797690 | 0.03739791 | -0.36356699 | N    | -3.37954724 | -0.86048318 | 0.42368382  |
| H    | 4.36819764 | 0.99178101 | -1.73547437 | C    | -4.82260960 | -1.17142517 | 0.38190127  |
| C    | 6.33125414 | 1.53338858 | -1.03400383 | C    | -5.02623017 | -1.27733618 | -1.13753978 |
| C    | 7.31681145 | 1.39572930 | -0.04433345 | H    | -4.89961360 | -2.30143606 | -1.50541717 |
| C    | 8.61283384 | 1.86681223 | -0.25211974 | H    | -5.98659931 | -0.88516276 | -1.47224687 |
| C    | 8.94999251 | 2.48512760 | -1.45857542 | O    | -3.98161335 | -0.45962038 | -1.70110070 |
| C    | 7.98234249 | 2.62470454 | -2.45361572 | C    | -2.96391057 | -0.34374478 | -0.81353253 |

|   |              |             |             |   |             |             |             |
|---|--------------|-------------|-------------|---|-------------|-------------|-------------|
| O | -1.89316465  | 0.13088624  | -1.11572001 | H | -0.49448505 | -1.22423343 | -2.75628946 |
| H | -5.01313503  | -2.13182765 | 0.86449300  | H | 1.05819052  | -1.99158701 | -3.19315840 |
| C | -5.68452222  | -0.06663718 | 1.03419702  | H | -1.33997277 | -3.29497857 | -1.85302673 |
| H | -5.34116634  | 0.07601246  | 2.06341259  | H | -0.14511604 | -4.03400522 | -2.92135529 |
| H | -5.49775746  | 0.87527421  | 0.50446030  | H | -0.10867371 | -3.89734032 | 0.03144551  |
| C | -7.16218120  | -0.39824651 | 1.01514356  | H | 1.10975035  | -4.67882525 | -0.98112645 |
| C | -8.03708607  | 0.24301224  | 0.12812404  | H | 2.45893440  | -2.70677162 | -1.08456388 |
| C | -9.39513645  | -0.08169253 | 0.09986446  | H | 1.64672583  | -2.29036875 | 0.45132620  |
| C | -9.89921615  | -1.05623294 | 0.96123869  |   |             |             |             |
| C | -9.03909835  | -1.69955232 | 1.85438507  |   |             |             |             |
| C | -7.68398432  | -1.37155013 | 1.88061523  |   |             |             |             |
| H | -7.02573796  | -1.86741605 | 2.59141544  |   |             |             |             |
| H | -9.42519069  | -2.45223843 | 2.53655500  |   |             |             |             |
| H | -10.95585004 | -1.30859985 | 0.94301982  |   |             |             |             |
| H | -10.05784278 | 0.43176950  | -0.59157421 |   |             |             |             |
| H | -7.65463015  | 1.01497848  | -0.53639120 |   |             |             |             |
| C | -2.93651548  | -1.79356644 | 2.72287000  |   |             |             |             |
| C | -2.24536093  | -3.16847143 | 2.82917736  |   |             |             |             |
| H | -2.65319418  | -3.71068824 | 3.68911902  |   |             |             |             |
| H | -2.39073080  | -3.78780748 | 1.93457299  |   |             |             |             |
| H | -1.17594131  | -3.01776856 | 2.99376505  |   |             |             |             |
| H | -4.02227614  | -1.93162775 | 2.71931953  |   |             |             |             |
| O | 0.59129319   | 1.66263175  | 4.09993512  |   |             |             |             |
| C | 1.61136643   | 2.64464034  | 3.89265818  |   |             |             |             |
| C | 2.71464666   | 2.32404329  | 4.92348108  |   |             |             |             |
| C | 1.98057472   | 1.46044752  | 5.98852114  |   |             |             |             |
| C | 0.51545013   | 1.47805234  | 5.52395727  |   |             |             |             |
| H | -0.02729687  | 2.32848004  | 5.96653742  |   |             |             |             |
| H | -0.05032661  | 0.55980648  | 5.68299915  |   |             |             |             |
| H | 2.09166302   | 1.85463101  | 7.00368374  |   |             |             |             |
| H | 2.36705229   | 0.43661417  | 5.98445679  |   |             |             |             |
| H | 3.14240658   | 3.23817800  | 5.34790248  |   |             |             |             |
| H | 3.52238971   | 1.75829600  | 4.45180652  |   |             |             |             |
| H | 1.93455243   | 2.56989268  | 2.85405344  |   |             |             |             |
| H | 1.18590802   | 3.64543627  | 4.06564173  |   |             |             |             |
| O | -1.23091125  | -0.66355356 | 4.13111132  |   |             |             |             |
| C | -2.53662019  | -0.95278949 | 4.06309209  |   |             |             |             |
| C | -3.48398678  | 0.27621100  | 4.27936146  |   |             |             |             |
| H | -4.51318017  | -0.04268652 | 4.03806535  |   |             |             |             |
| C | -3.47367828  | 0.67058191  | 5.76439320  |   |             |             |             |
| H | -4.14904190  | 1.51299505  | 5.96030592  |   |             |             |             |
| H | -3.78587064  | -0.16720384 | 6.40007051  |   |             |             |             |
| H | -2.46410450  | 0.96366106  | 6.06998599  |   |             |             |             |
| C | -3.11700238  | 1.49022595  | 3.41552849  |   |             |             |             |
| H | -3.16131089  | 1.27984043  | 2.34008533  |   |             |             |             |
| H | -3.79740330  | 2.32928623  | 3.60907917  |   |             |             |             |
| H | -2.09747327  | 1.81618480  | 3.64326354  |   |             |             |             |
| H | -2.85981518  | -1.69300389 | 4.83758613  |   |             |             |             |
| O | 0.82443284   | -1.43630727 | -1.20975516 |   |             |             |             |
| C | 1.48609452   | -2.55273538 | -0.59422176 |   |             |             |             |
| C | 0.54893830   | -3.75132063 | -0.83057166 |   |             |             |             |
| C | -0.27115640  | -3.33814045 | -2.08616783 |   |             |             |             |
| C | 0.26640173   | -1.93477810 | -2.43116231 |   |             |             |             |

**Table 61.** Geometric coordinates and thermally corrected MP2 energies for IRC derived reactants leading to (*R,S*)-6 from 5  $D_{2d}$  tetramer

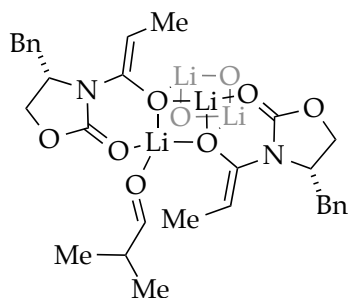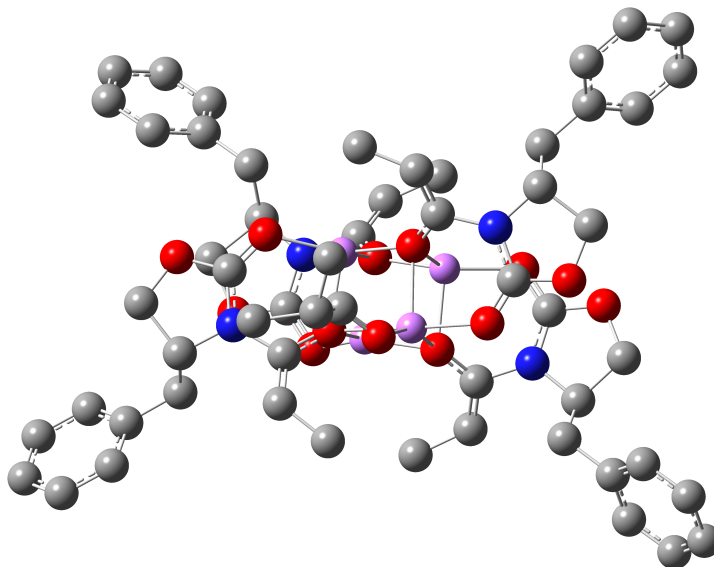

$G = -3399.030426$  Hartree

$G_{MP2} = -2126262.914$  kcal/mol

$\Delta G_{MP2} = -10.11563257$  kcal/mol vs. 5  $D_{2d}$  tetramer and isobutyraldehyde

$\Delta G_{MP2} = -12.45772222$  kcal/mol vs. 5  $D_{2d}$  tetramer transition state leading to (*R,S*)-6

| Atom | X           | Y          | Z           | Atom | X           | Y           | Z           |
|------|-------------|------------|-------------|------|-------------|-------------|-------------|
| Li   | 0.00000000  | 0.00000000 | 0.00000000  | C    | -6.42317781 | 1.75048119  | 3.39115978  |
| Li   | 0.00000000  | 0.00000000 | 2.71116570  | H    | -7.40950294 | 1.48140751  | 3.01036585  |
| O    | 2.03422653  | 0.00000000 | 2.80836724  | H    | -6.53246339 | 2.51385160  | 4.16878656  |
| C    | 2.71044244  | 0.71352022 | 2.07931518  | C    | -5.60534045 | 0.53632735  | 3.87114622  |
| O    | 4.02638500  | 0.44280611 | 1.85833045  | N    | -4.28418011 | 0.85513112  | 3.30235110  |
| C    | 4.53849157  | 1.33496012 | 0.84618632  | C    | -3.08234665 | 0.06029263  | 3.56048156  |
| H    | 4.68770970  | 0.75258447 | -0.06686070 | O    | -2.19734169 | 0.05318511  | 2.59827184  |
| H    | 5.49642144  | 1.72817498 | 1.19097482  | Li   | -2.12202585 | -1.15421291 | 1.04382305  |
| C    | 3.45952512  | 2.42709255 | 0.66403950  | O    | -3.86648352 | -1.69359070 | 0.37444609  |
| N    | 2.33570996  | 1.82743275 | 1.39251214  | C    | -4.51280242 | -0.86643899 | -0.26355487 |
| C    | 0.99340287  | 2.38078770 | 1.45644265  | O    | -5.87166623 | -0.83097334 | -0.18918592 |
| C    | 0.87335236  | 3.72188844 | 1.58839266  | C    | -6.35209206 | 0.33493195  | -0.89283179 |
| H    | 1.78082923  | 4.30210313 | 1.73289566  | H    | -6.64433385 | 1.08360936  | -0.14957436 |
| C    | -0.42321658 | 4.47923931 | 1.54131276  | H    | -7.22414010 | 0.04514503  | -1.48042631 |
| H    | -0.75710077 | 4.81327935 | 2.53636477  | C    | -5.16413604 | 0.82050788  | -1.74872167 |
| H    | -0.33169932 | 5.38460881 | 0.92625136  | N    | -4.06047326 | 0.10181400  | -1.10014828 |
| H    | -1.23535383 | 3.88024991 | 1.11771127  | C    | -2.64972525 | 0.28267756  | -1.40108250 |
| O    | 0.03496402  | 1.48706903 | 1.33985988  | C    | -2.28965612 | 0.47579531  | -2.68788486 |
| Li   | -1.88917120 | 1.42156733 | 1.24531406  | H    | -3.05176949 | 0.38663318  | -3.45701763 |
| O    | -3.50228799 | 2.36676551 | 1.68583753  | C    | -0.88325517 | 0.77940446  | -3.12406709 |
| C    | -4.37329194 | 1.86015846 | 2.39093476  | H    | -0.30449149 | -0.12585271 | -3.35840221 |
| O    | -5.65501130 | 2.31797847 | 2.31161104  | H    | -0.87764102 | 1.40655348  | -4.02410752 |

|   |             |             |             |   |              |             |             |
|---|-------------|-------------|-------------|---|--------------|-------------|-------------|
| H | -0.33013703 | 1.31839912  | -2.34545362 | H | -3.80925956  | -0.47444305 | 5.46875047  |
| O | -1.87277173 | 0.27328790  | -0.34017831 | C | -1.91810024  | -1.57179741 | 5.08965689  |
| C | -4.98416121 | 2.35035495  | -1.73712304 | H | -2.32160631  | -2.46843116 | 5.57836235  |
| H | -4.77739641 | 2.66358552  | -0.70793416 | H | -1.37751196  | -1.89826575 | 4.19538314  |
| H | -4.09509439 | 2.58913422  | -2.33028474 | H | -1.17459731  | -1.13828679 | 5.77373482  |
| C | -6.19884660 | 3.07551632  | -2.27697454 | C | -6.15034555  | -0.82892240 | 3.39368187  |
| C | -6.49136943 | 3.07108154  | -3.64936113 | H | -6.25047066  | -0.81492542 | 2.30336579  |
| C | -7.62390545 | 3.71867801  | -4.14268901 | H | -5.39633719  | -1.58568089 | 3.63371681  |
| C | -8.48512125 | 4.38801931  | -3.27010575 | C | -7.47271181  | -1.17071861 | 4.04581832  |
| C | -8.20282742 | 4.40583910  | -1.90378612 | C | -8.67341917  | -1.10455211 | 3.32599884  |
| C | -7.06944728 | 3.75432254  | -1.41274731 | C | -9.89571544  | -1.39153321 | 3.93786414  |
| H | -6.84752167 | 3.78032107  | -0.34802353 | C | -9.93655213  | -1.75018758 | 5.28532551  |
| H | -8.86190930 | 4.93172853  | -1.21770385 | C | -8.74721405  | -1.82661536 | 6.01413315  |
| H | -9.36532056 | 4.89669298  | -3.65414008 | C | -7.52906872  | -1.54065274 | 5.39855680  |
| H | -7.83055015 | 3.70692001  | -5.20978902 | H | -6.60668584  | -1.61805111 | 5.97084681  |
| H | -5.81872847 | 2.56563532  | -4.33953691 | H | -8.76804379  | -2.11615850 | 7.06162088  |
| H | -5.27485499 | 0.47440301  | -2.78556850 | H | -10.88600372 | -1.97583238 | 5.76330970  |
| O | -0.23214192 | -1.50241524 | 1.26239451  | H | -10.81416396 | -1.33964565 | 3.35892294  |
| C | 0.38834639  | -2.63366627 | 1.00735981  | H | -8.64694188  | -0.84226759 | 2.27056170  |
| N | 1.78321797  | -2.49313557 | 0.61359759  | H | -5.55022240  | 0.54023805  | 4.96293261  |
| C | 2.22073050  | -1.56382065 | -0.26813379 | C | 3.13235419   | 2.72138598  | -0.81245423 |
| O | 1.57876020  | -0.68512749 | -0.84645842 | H | 2.81235589   | 1.78547210  | -1.28378965 |
| O | 3.55431671  | -1.69116088 | -0.48246502 | H | 2.27848092   | 3.40750133  | -0.83412267 |
| C | 4.09243798  | -2.67143384 | 0.43155181  | C | 4.30902287   | 3.31837536  | -1.55557103 |
| H | 4.67313499  | -2.13673527 | 1.18748002  | C | 4.70459389   | 4.64487743  | -1.32414020 |
| H | 4.74646677  | -3.33898506 | -0.13155209 | C | 5.80163149   | 5.19253633  | -1.98857594 |
| C | 2.86715667  | -3.38577477 | 1.04506650  | C | 6.52429970   | 4.42187625  | -2.90241745 |
| H | 2.73425189  | -4.37522200 | 0.58829493  | C | 6.13859491   | 3.10361636  | -3.14705551 |
| C | 2.94990683  | -3.53819191 | 2.57610135  | C | 5.04092649   | 2.55800941  | -2.47784556 |
| C | 4.10932394  | -4.41494404 | 2.99994065  | H | 4.73935090   | 1.53309179  | -2.68216405 |
| C | 5.26234618  | -3.85854637 | 3.57057085  | H | 6.68870643   | 2.49800125  | -3.86265082 |
| C | 6.34228205  | -4.66440150 | 3.93741030  | H | 7.37685038   | 4.84876012  | -3.42387614 |
| C | 6.28653870  | -6.04411262 | 3.73800224  | H | 6.08848658   | 6.22366280  | -1.79850655 |
| C | 5.14190248  | -6.61299697 | 3.17449835  | H | 4.13864491   | 5.25783418  | -0.62540291 |
| C | 4.06474784  | -5.80495478 | 2.81134832  | H | 3.77114973   | 3.35760019  | 1.15709664  |
| H | 3.17172233  | -6.25836514 | 2.38587268  | O | 0.00025370   | 0.91601613  | 4.59269241  |
| H | 5.08545099  | -7.68805102 | 3.02384488  | C | -0.62939978  | 1.93491880  | 4.81617681  |
| H | 7.12501409  | -6.67317641 | 4.02487188  | H | -1.23328808  | 2.39857540  | 4.01110581  |
| H | 7.22487862  | -4.21301040 | 4.38334617  | C | -0.63420316  | 2.66076140  | 6.13991625  |
| H | 5.30701119  | -2.78496326 | 3.73925355  | C | 0.08000688   | 4.01698167  | 5.96967712  |
| H | 2.00067436  | -3.96270998 | 2.92001624  | H | 0.07160302   | 4.56599522  | 6.91786841  |
| H | 3.03468924  | -2.53795890 | 3.01416030  | H | 1.12139509   | 3.88409702  | 5.65897773  |
| C | -0.11434279 | -3.88555312 | 1.09900006  | H | -0.42252527  | 4.63815756  | 5.21818250  |
| C | -1.50431398 | -4.19690725 | 1.58122756  | H | -0.07571533  | 2.04098515  | 6.85074912  |
| H | -2.23425034 | -4.27824786 | 0.76218607  | C | -2.08272412  | 2.84433630  | 6.62723329  |
| H | -1.52893784 | -5.14980224 | 2.12481532  | H | -2.58494449  | 1.87984846  | 6.75373798  |
| H | -1.87447933 | -3.42536581 | 2.26699922  | H | -2.09434765  | 3.37089961  | 7.58795829  |
| H | 0.50808021  | -4.71879935 | 0.78586002  | H | -2.66565796  | 3.43903502  | 5.91267107  |
| C | -3.01802360 | -0.60981181 | 4.73858536  |   |              |             |             |

**Table 62.** Geometric coordinates and thermally corrected MP2 energies for IRC derived products leading to (*R,S*)-6 from 5  $D_{2d}$  tetramer

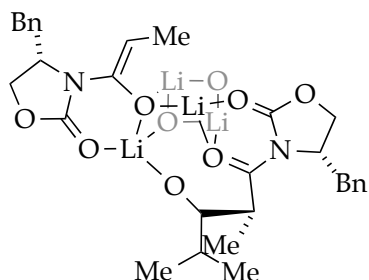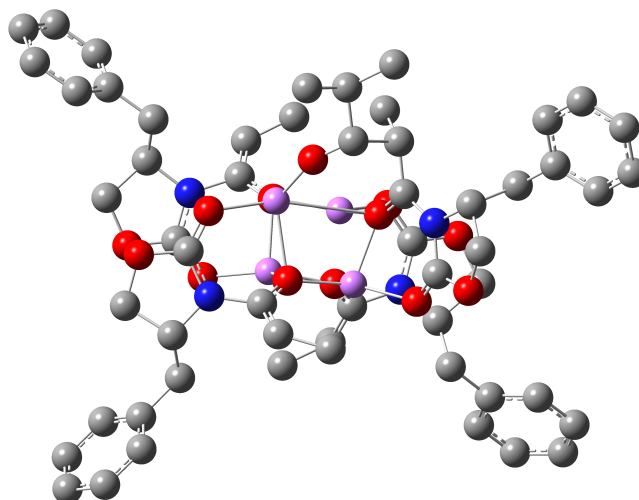

$G = -3399.016367$  Hartree

$G_{MP2} = -2126253.014$  kcal/mol

$\Delta G_{MP2} = -2.558143128$  kcal/mol vs. 5  $D_{2d}$  tetramer and isobutyraldehyde

$\Delta G_{MP2} = -0.21605348$  kcal/mol vs. 5  $D_{2d}$  tetramer transition state leading to (*R,S*)-6

| Atom | X           | Y          | Z          | Atom | X           | Y           | Z           |
|------|-------------|------------|------------|------|-------------|-------------|-------------|
| Li   | 0.00000000  | 0.00000000 | 0.00000000 | N    | -3.72685103 | 2.36596120  | 3.30666196  |
| Li   | 0.00000000  | 0.00000000 | 2.80046440 | C    | -3.32858596 | 1.01334170  | 3.19038196  |
| O    | 1.97259065  | 0.00000000 | 2.95152253 | O    | -2.82107224 | 0.63681315  | 2.12525078  |
| C    | 2.71053915  | 0.61365148 | 2.19114918 | Li   | -2.30384316 | -0.87846126 | 0.88024617  |
| O    | 4.01902212  | 0.26727279 | 2.05048778 | O    | -3.95147213 | -1.42525482 | 0.07563808  |
| C    | 4.59777801  | 1.03046032 | 0.97048541 | C    | -4.47992842 | -0.69730615 | -0.75946979 |
| H    | 4.70130068  | 0.36470916 | 0.10900452 | O    | -5.82331090 | -0.71120813 | -0.94287761 |
| H    | 5.58201728  | 1.37877266 | 1.28714444 | C    | -6.18158335 | 0.31976127  | -1.88304921 |
| C    | 3.60058823  | 2.17667163 | 0.69704152 | H    | -6.61685558 | 1.15641056  | -1.32506615 |
| N    | 2.41113960  | 1.67076393 | 1.39107570 | H    | -6.92898303 | -0.08268758 | -2.56779954 |
| C    | 1.11722490  | 2.34017058 | 1.41951018 | C    | -4.86275995 | 0.71951718  | -2.57278366 |
| C    | 1.12758603  | 3.68073790 | 1.58941501 | N    | -3.88959982 | 0.19154261  | -1.60785189 |
| H    | 2.08152470  | 4.15624339 | 1.79791974 | C    | -2.44549227 | 0.32950153  | -1.72370031 |
| C    | -0.08656874 | 4.56358422 | 1.55308238 | C    | -1.89862898 | 0.38879437  | -2.95679914 |
| H    | -0.59789029 | 4.62325920 | 2.52708537 | H    | -2.53973462 | 0.22815048  | -3.81854662 |
| H    | 0.18575230  | 5.58955993 | 1.27792108 | C    | -0.43678146 | 0.63411784  | -3.21005975 |
| H    | -0.83025845 | 4.22075439 | 0.82570503 | H    | 0.14977093  | -0.29430398 | -3.25213115 |
| O    | 0.08464499  | 1.54151024 | 1.23743291 | H    | -0.28656028 | 1.15621554  | -4.16293208 |
| Li   | -1.78606124 | 1.76266310 | 0.79656103 | H    | 0.00732532  | 1.25428886  | -2.42215833 |
| O    | -3.10038911 | 3.17195601 | 1.18354132 | O    | -1.81685925 | 0.42196138  | -0.56874254 |
| C    | -3.56093532 | 3.31622497 | 2.30165860 | C    | -4.73194543 | 2.23225938  | -2.82246044 |
| O    | -4.01098552 | 4.51019599 | 2.73486989 | H    | -4.82110792 | 2.75318503  | -1.86167810 |
| C    | -4.26884140 | 4.43758455 | 4.15588454 | H    | -3.72183524 | 2.42544560  | -3.19844037 |
| H    | -5.13351434 | 5.06269137 | 4.37754836 | C    | -5.77090999 | 2.73896362  | -3.80147869 |
| H    | -3.38762427 | 4.81871336 | 4.68094030 | C    | -5.65728495 | 2.45757240  | -5.17157893 |
| C    | -4.50810456 | 2.94577621 | 4.42004732 | C    | -6.62554300 | 2.89340093  | -6.07563624 |

|   |             |             |             |   |             |             |             |
|---|-------------|-------------|-------------|---|-------------|-------------|-------------|
| C | -7.72746726 | 3.62414049  | -5.62525227 | C | -7.39196725 | 3.08984293  | 7.86173963  |
| C | -7.84961788 | 3.91773448  | -4.26693167 | C | -6.66781781 | 2.56783779  | 6.79054229  |
| C | -6.87872632 | 3.47763480  | -3.36486720 | H | -5.99263394 | 1.73105275  | 6.95766130  |
| H | -6.97538788 | 3.72162065  | -2.30906006 | H | -7.27235303 | 2.66075331  | 8.85283058  |
| H | -8.69834807 | 4.49367315  | -3.90735665 | H | -8.83872688 | 4.56034558  | 8.49520513  |
| H | -8.48068863 | 3.96728176  | -6.32925365 | H | -9.11243715 | 5.51750487  | 6.21511667  |
| H | -6.51649426 | 2.66805936  | -7.13326272 | H | -7.83042537 | 4.58520453  | 4.31588602  |
| H | -4.79574764 | 1.90068156  | -5.53421117 | H | -4.07371639 | 2.64939358  | 5.37537685  |
| H | -4.76171299 | 0.18761554  | -3.52899226 | C | 3.35757716  | 2.43845110  | -0.80042541 |
| O | -0.51353538 | -1.39744505 | 1.30791460  | H | 2.99603629  | 1.50905598  | -1.25444410 |
| C | 0.02130797  | -2.58875603 | 1.12089265  | H | 2.55347370  | 3.17877300  | -0.88145538 |
| N | 1.45983831  | -2.57515359 | 0.88922461  | C | 4.60325640  | 2.93042783  | -1.50713261 |
| C | 2.05317767  | -1.76632885 | -0.01848157 | C | 5.06594663  | 4.24120458  | -1.31430561 |
| O | 1.53604084  | -0.89674177 | -0.72309855 | C | 6.22864200  | 4.69049561  | -1.93989912 |
| O | 3.38384190  | -2.01458898 | -0.09069930 | C | 6.95105280  | 3.83504711  | -2.77504037 |
| C | 3.74922442  | -2.94164128 | 0.95807541  | C | 6.49928381  | 2.53116798  | -2.98075336 |
| H | 4.27861836  | -2.37639859 | 1.72929002  | C | 5.33550721  | 2.08451485  | -2.35117611 |
| H | 4.41250713  | -3.69430570 | 0.52956443  | H | 4.98341789  | 1.07011289  | -2.52489456 |
| C | 2.41584673  | -3.52152798 | 1.47919635  | H | 7.04938249  | 1.85997709  | -3.63525598 |
| H | 2.24811141  | -4.52362320 | 1.06233889  | H | 7.85518861  | 4.18516985  | -3.26592824 |
| C | 2.32821700  | -3.58721346 | 3.01510352  | H | 6.56766708  | 5.71094738  | -1.78059339 |
| C | 3.35158096  | -4.53525579 | 3.60395313  | H | 4.50237414  | 4.91877645  | -0.67597838 |
| C | 4.48619375  | -4.04933021 | 4.26815010  | H | 3.94688828  | 3.10370513  | 1.17385738  |
| C | 5.44082425  | -4.92402197 | 4.79156251  | O | -0.90016000 | 0.13864979  | 4.32983358  |
| C | 5.27644249  | -6.30303001 | 4.65767712  | C | -1.89390463 | 0.46468694  | 5.13223888  |
| C | 4.14846855  | -6.80154463 | 4.00159355  | H | -1.95379632 | 1.55998648  | 5.37638912  |
| C | 3.19643821  | -5.92479473 | 3.48212541  | C | -1.86385959 | -0.27439335 | 6.50999719  |
| H | 2.31346345  | -6.32278275 | 2.98593776  | C | -0.53107881 | 0.06019202  | 7.19728949  |
| H | 4.00655743  | -7.87458160 | 3.90068484  | H | -0.41601189 | -0.50624243 | 8.13009868  |
| H | 6.01711731  | -6.98510665 | 5.06669128  | H | 0.30410989  | -0.17143449 | 6.53274433  |
| H | 6.31030737  | -4.52599127 | 5.30844877  | H | -0.47928559 | 1.12924526  | 7.44757585  |
| H | 4.61402443  | -2.97585051 | 4.38755214  | H | -1.86719638 | -1.35137261 | 6.29592195  |
| H | 1.31367887  | -3.90701705 | 3.27738471  | C | -3.04132439 | 0.05822061  | 7.43710462  |
| H | 2.46008261  | -2.57417882 | 3.40960749  | H | -3.99592805 | -0.34467852 | 7.07638449  |
| C | -0.58495648 | -3.79611809 | 1.13781355  | H | -2.87804867 | -0.35744757 | 8.43877584  |
| C | -2.03709122 | -4.02924499 | 1.44209542  | H | -3.15380199 | 1.14603609  | 7.55812124  |
| H | -2.64636677 | -4.14632667 | 0.53427269  |   |             |             |             |
| H | -2.17303146 | -4.94120068 | 2.03806283  |   |             |             |             |
| H | -2.46918751 | -3.20279533 | 2.01447397  |   |             |             |             |
| H | 0.01549648  | -4.66806031 | 0.89313594  |   |             |             |             |
| C | -3.38072540 | 0.16905978  | 4.39306051  |   |             |             |             |
| H | -4.16029947 | 0.49911839  | 5.07970347  |   |             |             |             |
| C | -3.51595997 | -1.31780772 | 4.06782038  |   |             |             |             |
| H | -4.29693904 | -1.51337035 | 3.32428739  |   |             |             |             |
| H | -2.56228481 | -1.69146213 | 3.68650001  |   |             |             |             |
| H | -3.76379761 | -1.88037597 | 4.97301904  |   |             |             |             |
| C | -6.00107228 | 2.54579513  | 4.34641102  |   |             |             |             |
| H | -6.40805822 | 2.90166417  | 3.39191064  |   |             |             |             |
| H | -6.06534149 | 1.45190774  | 4.32837471  |   |             |             |             |
| C | -6.80873613 | 3.10179848  | 5.50070965  |   |             |             |             |
| C | -7.69685569 | 4.16893899  | 5.31232091  |   |             |             |             |
| C | -8.42466209 | 4.69309372  | 6.38285077  |   |             |             |             |
| C | -8.27234849 | 4.15569271  | 7.66101368  |   |             |             |             |

**Table 63.** Geometric coordinates and thermally corrected MP2 energies for IRC derived reactants leading to (*S,R*)-6 from 5  $D_{2d}$  tetramer

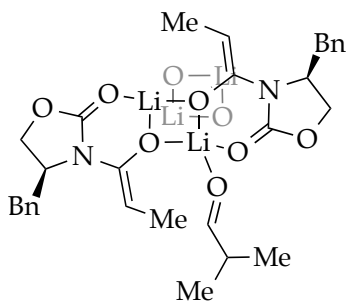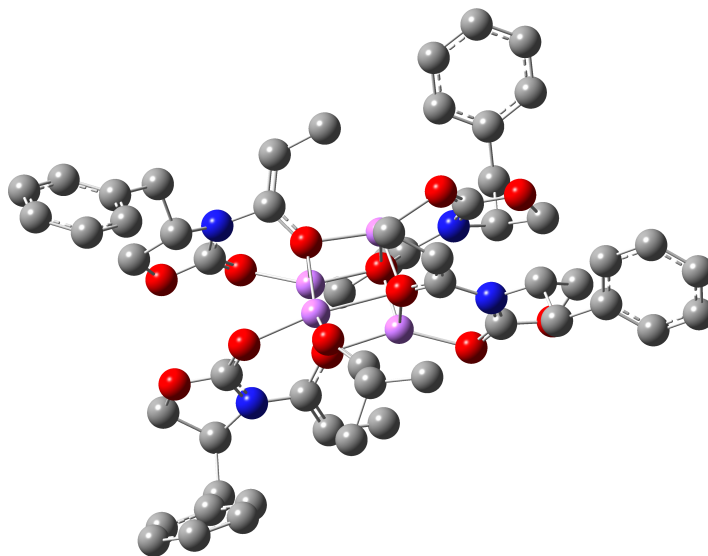

$G = -3399.015586$  Hartree

$G_{MP2} = -2126255.63$  kcal/mol

$\Delta G_{MP2} = -2.831781333$  kcal/mol vs. 5  $D_{2d}$  tetramer and isobutyraldehyde

$\Delta G_{MP2} = -7.970548406$  kcal/mol vs. 5  $D_{2d}$  tetramer transition state leading to (*S,R*)-6

| Atom | X           | Y          | Z           | Atom | X           | Y           | Z           |
|------|-------------|------------|-------------|------|-------------|-------------|-------------|
| Li   | 0.00000000  | 0.00000000 | 0.00000000  | O    | -5.45841943 | 2.86442763  | 1.84287759  |
| Li   | 0.00000000  | 0.00000000 | 2.70878580  | C    | -6.45483959 | 2.03153925  | 2.47488381  |
| O    | 2.00008535  | 0.00000000 | 2.85189427  | H    | -6.84828650 | 1.33735360  | 1.72625062  |
| C    | 2.76279667  | 0.73433528 | 2.23790626  | H    | -7.25227216 | 2.67509447  | 2.84877265  |
| O    | 4.09232502  | 0.45058682 | 2.18349739  | C    | -5.68112000 | 1.30382761  | 3.57922609  |
| C    | 4.71015933  | 1.30250621 | 1.20212205  | H    | -6.01286790 | 0.26759465  | 3.66980470  |
| H    | 4.80586143  | 0.73526117 | 0.27146330  | N    | -4.32263821 | 1.33499278  | 3.01586778  |
| H    | 5.69628552  | 1.58189122 | 1.57637715  | C    | -3.29588438 | 0.33609771  | 3.30034120  |
| C    | 3.74735088  | 2.49449798 | 1.06159466  | O    | -2.25234094 | 0.37959858  | 2.51864261  |
| H    | 3.61483082  | 2.77034707 | 0.01093793  | Li   | -2.24872973 | -0.86051447 | 1.01168091  |
| N    | 2.50058873  | 1.88382023 | 1.54291043  | O    | -4.05553136 | -1.04913027 | 0.35313421  |
| C    | 1.17456407  | 2.34484966 | 1.17895040  | C    | -4.51455334 | -0.24739050 | -0.45232659 |
| C    | 1.01916829  | 3.58377109 | 0.65171464  | O    | -5.84055048 | 0.06503107  | -0.43419697 |
| H    | 1.87131965  | 4.24058851 | 0.54261123  | C    | -6.08141417 | 1.13348079  | -1.37277310 |
| C    | -0.31998965 | 4.10614290 | 0.19879097  | H    | -6.14497226 | 2.07328587  | -0.81441496 |
| H    | -1.00393812 | 4.32039980 | 1.03331961  | H    | -7.02960170 | 0.92887804  | -1.87293423 |
| H    | -0.19850876 | 5.04108775 | -0.35893855 | C    | -4.86794735 | 1.10336535  | -2.31772474 |
| H    | -0.84263975 | 3.40701756 | -0.46880639 | H    | -4.51174700 | 2.11342550  | -2.54026172 |
| O    | 0.21013824  | 1.46784254 | 1.35707333  | N    | -3.88632200 | 0.44096785  | -1.45048002 |
| Li   | -1.71145074 | 1.67488737 | 1.18662804  | C    | -2.44825251 | 0.62148480  | -1.53486541 |
| O    | -3.24592496 | 2.77529935 | 1.49807976  | C    | -1.89369825 | 1.00284468  | -2.70906098 |
| C    | -4.22754177 | 2.32948450 | 2.08410761  | H    | -2.51435812 | 1.08494642  | -3.59221068 |



|   |             |             |             |   |              |             |            |
|---|-------------|-------------|-------------|---|--------------|-------------|------------|
| C | -0.42727261 | 1.30399573  | -2.86743449 | H | 0.03358132   | -4.62177163 | 0.40899943 |
| H | 0.16981845  | 0.40969571  | -3.09877671 | C | -3.53537225  | -0.55835253 | 4.29834199 |
| H | -0.26385400 | 2.01897847  | -3.68278380 | H | -4.44684084  | -0.47843048 | 4.87930313 |
| H | 0.00177944  | 1.74697107  | -1.96066457 | C | -2.67342228  | -1.75927042 | 4.57262364 |
| O | -1.81372137 | 0.44277208  | -0.39772977 | H | -3.24210079  | -2.69198317 | 4.44334546 |
| C | -5.15971708 | 0.37628774  | -3.65997207 | H | -1.81635942  | -1.79941336 | 3.89645350 |
| H | -5.94217767 | 0.95915090  | -4.16385576 | H | -2.28039688  | -1.77444073 | 5.60000193 |
| H | -4.27102471 | 0.44351062  | -4.29420787 | C | -5.75856966  | 2.01933105  | 4.95085098 |
| C | -5.59007788 | -1.06975515 | -3.54150414 | H | -5.00594651  | 1.57391796  | 5.60952942 |
| C | -6.93771380 | -1.43627147 | -3.65650282 | H | -5.47348459  | 3.06890374  | 4.80620910 |
| C | -7.33176327 | -2.77008124 | -3.53748357 | C | -7.13140486  | 1.93465638  | 5.58318514 |
| C | -6.37859477 | -3.76157439 | -3.30339382 | C | -7.59462426  | 0.72593212  | 6.12522423 |
| C | -5.03066489 | -3.41158662 | -3.19756786 | C | -8.86826036  | 0.63305248  | 6.68529897 |
| C | -4.63931100 | -2.07811938 | -3.31915199 | C | -9.70471928  | 1.75143508  | 6.71590543 |
| H | -3.58721241 | -1.81401916 | -3.24580790 | C | -9.25601380  | 2.96092415  | 6.18526573 |
| H | -4.27980719 | -4.17791388 | -3.02459088 | C | -7.98020609  | 3.04890799  | 5.62390283 |
| H | -6.68225109 | -4.80087933 | -3.21084779 | H | -7.63390060  | 3.99842831  | 5.22099552 |
| H | -8.38206846 | -3.03339600 | -3.63229277 | H | -9.89609218  | 3.83896357  | 6.20998633 |
| H | -7.68633304 | -0.67143297 | -3.85465476 | H | -10.69644756 | 1.68029520  | 7.15423823 |
| O | -0.41253416 | -1.44997717 | 1.32470727  | H | -9.20656881  | -0.31201304 | 7.10198800 |
| C | 0.10799117  | -2.60912951 | 0.96653065  | H | -6.94846066  | -0.14954990 | 6.11492728 |
| N | 1.55026222  | -2.60447329 | 0.73338591  | C | 4.21772436   | 3.75681131  | 1.83604379 |
| C | 2.11357677  | -1.65073156 | -0.05085780 | H | 5.14001920   | 4.09110219  | 1.34275494 |
| O | 1.54710936  | -0.84453695 | -0.78974520 | H | 3.48200560   | 4.55183938  | 1.68698684 |
| O | 3.46296909  | -1.65625488 | 0.07082828  | C | 4.46872718   | 3.57735459  | 3.31676297 |
| C | 3.84636420  | -2.69988619 | 0.99363587  | C | 5.76611586   | 3.39220187  | 3.81393145 |
| H | 4.60077515  | -2.29283134 | 1.66593745  | C | 5.99743534   | 3.23541001  | 5.18133178 |
| H | 4.26870288  | -3.52832646 | 0.41331270  | C | 4.92938651   | 3.27118750  | 6.07792873 |
| C | 2.54352222  | -3.10141190 | 1.70944262  | C | 3.63305380   | 3.46781778  | 5.59740071 |
| H | 2.43376206  | -2.52660822 | 2.63700921  | C | 3.40418217   | 3.61882968  | 4.22957676 |
| C | 2.44679840  | -4.60150013 | 2.01773163  | H | 2.39459537   | 3.78476284  | 3.86168148 |
| H | 1.44544154  | -4.80157665 | 2.41387224  | H | 2.79793630   | 3.51608975  | 6.29072586 |
| H | 2.53958888  | -5.16591443 | 1.08178231  | H | 5.10602633   | 3.15657070  | 7.14406243 |
| C | 3.50620443  | -5.04629428 | 3.00679199  | H | 7.01196462   | 3.09479019  | 5.54499516 |
| C | 4.59128961  | -5.83360759 | 2.60042398  | H | 6.60800382   | 3.38694732  | 3.12434607 |
| C | 5.57592295  | -6.22517453 | 3.51028514  | O | -0.15321313  | 0.19591588  | 4.74913640 |
| C | 5.49041170  | -5.83165537 | 4.84574319  | C | -0.75956217  | 1.04984763  | 5.37209968 |
| C | 4.41237735  | -5.04844080 | 5.26518399  | H | -1.25407685  | 1.88200289  | 4.83192450 |
| C | 3.42991749  | -4.66187723 | 4.35435825  | C | -0.83871674  | 1.09339349  | 6.88081616 |
| H | 2.59038430  | -4.05834540 | 4.69282485  | C | 0.15934846   | 2.15740510  | 7.38590754 |
| H | 4.33402875  | -4.74092543 | 6.30471336  | H | 0.11649125   | 2.22101179  | 8.47883545 |
| H | 6.25469837  | -6.13554315 | 5.55605144  | H | 1.18449314   | 1.90694740  | 7.09499318 |
| H | 6.40703608  | -6.83988453 | 3.17420828  | H | -0.08172199  | 3.14989094  | 6.98451632 |
| H | 4.66098694  | -6.15207098 | 1.56243496  | H | -0.52233902  | 0.10920452  | 7.24523695 |
| C | -0.53761057 | -3.78316542 | 0.79353815  | C | -2.26947523  | 1.39829580  | 7.34974233 |
| C | -2.00286914 | -3.98843745 | 1.06062693  | H | -2.97141585  | 0.63470616  | 7.00123622 |
| H | -2.62439761 | -3.83176448 | 0.16637210  | H | -2.31038500  | 1.43518866  | 8.44389422 |
| H | -2.19999692 | -5.01024578 | 1.40809058  | H | -2.60972866  | 2.37009931  | 6.97056906 |
| H | -2.37380504 | -3.30653439 | 1.83465229  |   |              |             |            |

**Table 64.** Geometric coordinates and thermally corrected MP2 energies for IRC derived products leading to (*S,R*)-6 from 5  $D_{2d}$  tetramer

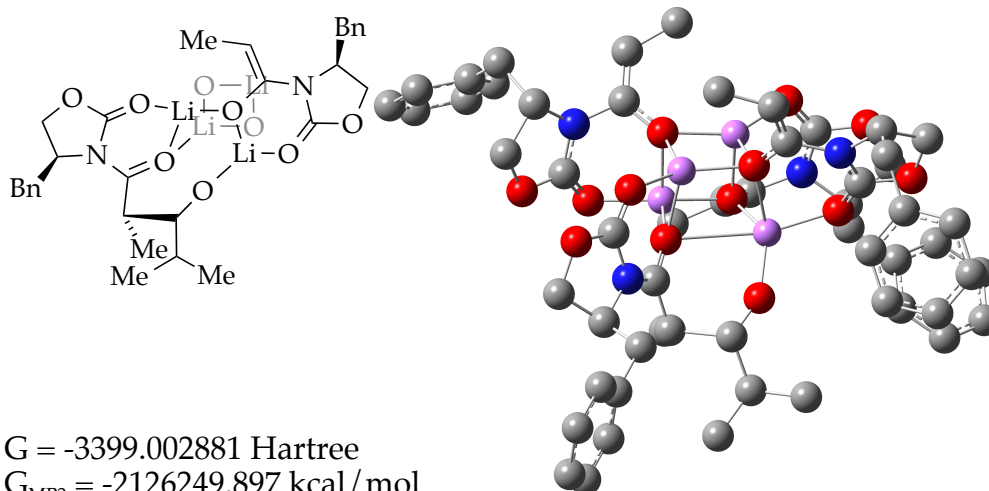

$G = -3399.002881$  Hartree

$G_{MP2} = -2126249.897$  kcal/mol

$\Delta G_{MP2} = 2.901640594$  kcal/mol vs. 5  $D_{2d}$  tetramer and isobutyraldehyde

$\Delta G_{MP2} = -2.237126478$  kcal/mol vs. 5  $D_{2d}$  tetramer transition state leading to (*S,R*)-6

| Atom | X          | Y           | Z           | Atom | X           | Y           | Z           |
|------|------------|-------------|-------------|------|-------------|-------------|-------------|
| Li   | 0.00000000 | 0.00000000  | 0.00000000  | C    | 1.87044736  | 2.31970643  | -4.92833876 |
| O    | 0.00000000 | 0.00000000  | 1.94879940  | H    | 0.92015639  | 2.43528780  | -5.45157094 |
| C    | 0.99312128 | 0.00000000  | 2.66156717  | N    | 1.77943175  | 1.20523464  | -3.95931873 |
| O    | 0.87472245 | 0.26787452  | 3.98838684  | C    | 0.63152489  | 0.77834141  | -3.24711262 |
| C    | 2.13474130 | 0.03634640  | 4.63788886  | O    | 0.70793858  | -0.28050197 | -2.61007039 |
| H    | 2.08424715 | -0.92746433 | 5.15529586  | Li   | -0.21137670 | -2.05905027 | -2.31228676 |
| H    | 2.29243976 | 0.83847765  | 5.36098829  | O    | -0.16477584 | -2.67806965 | -4.14890785 |
| C    | 3.17033506 | 0.02932919  | 3.49999344  | C    | 0.93770193  | -3.00466500 | -4.58106470 |
| H    | 3.86016546 | -0.80975387 | 3.62649336  | O    | 1.36314628  | -2.59426707 | -5.80214964 |
| N    | 2.30540750 | -0.23037191 | 2.34289579  | C    | 2.74293694  | -2.97888732 | -5.97750064 |
| C    | 2.80226431 | -0.74339776 | 1.08295216  | H    | 3.36314402  | -2.08211596 | -5.88229308 |
| C    | 4.11864402 | -1.05774902 | 0.97102299  | H    | 2.84408590  | -3.39579898 | -6.98095860 |
| H    | 4.79430332 | -0.91029003 | 1.80240664  | C    | 3.03107935  | -4.00789268 | -4.86096715 |
| C    | 4.70826750 | -1.63124662 | -0.29162894 | H    | 3.94889361  | -3.75336188 | -4.32141249 |
| H    | 4.84842274 | -0.88311596 | -1.08758402 | N    | 1.88340819  | -3.77201697 | -3.97465943 |
| H    | 5.69642285 | -2.06019105 | -0.09187946 | C    | 1.86744648  | -4.00518886 | -2.53696348 |
| H    | 4.09527847 | -2.44253878 | -0.71002555 | C    | 2.23516655  | -5.21101694 | -2.05482004 |
| O    | 1.90728173 | -0.88832389 | 0.12834652  | H    | 2.41943270  | -6.01883816 | -2.75269112 |
| Li   | 2.27996718 | -1.16520076 | -1.74006952 | C    | 2.36276058  | -5.51476429 | -0.58707219 |
| O    | 3.33355219 | -0.41186818 | -3.23467462 | H    | 1.41445937  | -5.84731450 | -0.14135351 |
| C    | 2.95910589 | 0.46308505  | -3.99425728 | H    | 3.09657744  | -6.31130553 | -0.41611910 |
| O    | 3.71056088 | 0.85566531  | -5.04244799 | H    | 2.69012951  | -4.63928893 | -0.01433029 |
| C    | 2.94345252 | 1.75891629  | -5.87266914 | O    | 1.51530529  | -2.94729875 | -1.83008020 |
| H    | 2.51612802 | 1.18194170  | -6.69881763 | Li   | 0.92274757  | -2.60736888 | -0.00882919 |
| H    | 3.62044788 | 2.51939733  | -6.26096665 | O    | 0.35151810  | -3.47958610 | 1.60626595  |

|   |             |             |             |   |             |            |             |
|---|-------------|-------------|-------------|---|-------------|------------|-------------|
| C | -0.64135453 | -2.95606623 | 2.11504086  | C | 2.36351750  | 4.79370180 | -5.24497253 |
| O | -0.69003020 | -2.68424318 | 3.43706575  | C | 1.19480364  | 5.36739595 | -5.76833795 |
| C | -1.95393206 | -2.05656676 | 3.74606177  | C | 1.26298342  | 6.40391279 | -6.69882879 |
| H | -1.74984650 | -1.17521134 | 4.35374359  | C | 2.50357008  | 6.88719036 | -7.12135023 |
| H | -2.55485911 | -2.77225679 | 4.31812830  | C | 3.67321240  | 6.33029711 | -6.60384500 |
| C | -2.59389351 | -1.71927863 | 2.38274242  | C | 3.60151024  | 5.29142766 | -5.67326418 |
| H | -2.39747956 | -0.67268818 | 2.12567989  | H | 4.51802180  | 4.87221358 | -5.26311323 |
| N | -1.78891022 | -2.58016472 | 1.49300359  | H | 4.64298336  | 6.70609980 | -6.91877123 |
| C | -1.84181233 | -2.51049958 | 0.03760490  | H | 2.55690610  | 7.69705308 | -7.84364301 |
| C | -2.87902523 | -3.12193535 | -0.57471093 | H | 0.34692696  | 6.83924827 | -7.08885619 |
| C | -3.12206761 | -3.08841872 | -2.05822793 | H | 0.22333998  | 5.00956465 | -5.43383714 |
| H | -2.61520394 | -3.90701316 | -2.59161153 | C | 4.00095817  | 1.33438268 | 3.37460619  |
| H | -4.19145864 | -3.17916231 | -2.28387084 | H | 4.71389510  | 1.33999293 | 4.20943823  |
| H | -2.77755793 | -2.14900750 | -2.50790536 | H | 4.59108847  | 1.25971447 | 2.45528299  |
| H | -3.55846750 | -3.70217639 | 0.04047554  | C | 3.20480608  | 2.62159663 | 3.38123217  |
| O | -0.85059095 | -1.84608192 | -0.53297847 | C | 3.17912435  | 3.43801656 | 4.52091753  |
| C | -4.10535845 | -1.98773450 | 2.32913422  | C | 2.43847536  | 4.62107398 | 4.54302346  |
| H | -4.43748835 | -1.83528215 | 1.29653662  | C | 1.70645740  | 5.00625960 | 3.41958563  |
| H | -4.29066982 | -3.04074036 | 2.57492523  | C | 1.72804437  | 4.20668240 | 2.27497659  |
| C | -4.87888816 | -1.08416525 | 3.26859554  | C | 2.47565795  | 3.02903994 | 2.25321495  |
| C | -5.45939796 | -1.58436474 | 4.44134099  | H | 2.48671640  | 2.42143929 | 1.35240058  |
| C | -6.15565099 | -0.74478037 | 5.31369037  | H | 1.15878726  | 4.49354813 | 1.39566766  |
| C | -6.28142877 | 0.61407507  | 5.02525565  | H | 1.12504387  | 5.92436210 | 3.43392289  |
| C | -5.70966874 | 1.12596209  | 3.85796607  | H | 2.43565223  | 5.23989930 | 5.43678332  |
| C | -5.01731313 | 0.28404019  | 2.98843579  | H | 3.75539709  | 3.14927561 | 5.39818409  |
| H | -4.58227043 | 0.69160274  | 2.07835891  | O | -0.42418750 | 1.58918757 | -0.72610972 |
| H | -5.80536371 | 2.18257931  | 3.62194745  | C | -0.48146284 | 2.43510377 | -1.73704320 |
| H | -6.82336402 | 1.26955457  | 5.70181383  | H | 0.43630105  | 3.07142291 | -1.85478904 |
| H | -6.60168485 | -1.15515348 | 6.21607933  | C | -1.67983434 | 3.43898136 | -1.64782411 |
| H | -5.37438135 | -2.64484665 | 4.66919577  | C | -1.53496542 | 4.23538001 | -0.34240643 |
| C | 3.17399491  | -5.45667685 | -5.39352944 | H | -2.40574118 | 4.88201539 | -0.17543684 |
| H | 4.07385499  | -5.46666606 | -6.02292349 | H | -1.42601327 | 3.55545819 | 0.50537846  |
| H | 3.39180904  | -6.11044285 | -4.54334993 | H | -0.64624225 | 4.88222114 | -0.38072745 |
| C | 1.99556447  | -5.98303888 | -6.18512620 | H | -2.59357995 | 2.83557536 | -1.56804237 |
| C | 2.06570943  | -6.09318635 | -7.58104663 | C | -1.81259390 | 4.39634980 | -2.84086240 |
| C | 0.98180187  | -6.56769867 | -8.32196788 | H | -2.10809465 | 3.88729485 | -3.76634064 |
| C | -0.19500105 | -6.94282703 | -7.67393057 | H | -2.57195716 | 5.16226058 | -2.64146708 |
| C | -0.27649514 | -6.84643684 | -6.28314053 | H | -0.86781734 | 4.92617369 | -3.03031834 |
| C | 0.80877543  | -6.37418535 | -5.54474788 |   |             |            |             |
| H | 0.73468790  | -6.31154740 | -4.46264152 |   |             |            |             |
| H | -1.18659403 | -7.14295668 | -5.76868422 |   |             |            |             |
| H | -1.04088879 | -7.31326737 | -8.24672882 |   |             |            |             |
| H | 1.06036104  | -6.64796411 | -9.40306963 |   |             |            |             |
| H | 2.98553374  | -5.81745156 | -8.09362724 |   |             |            |             |
| C | -0.56933076 | 1.62764077  | -3.21034628 |   |             |            |             |
| H | -0.55284261 | 2.37712996  | -4.00297499 |   |             |            |             |
| C | -1.85383962 | 0.79135973  | -3.26465402 |   |             |            |             |
| H | -1.83426510 | 0.05878348  | -4.07971073 |   |             |            |             |
| H | -1.98689784 | 0.26439750  | -2.31615409 |   |             |            |             |
| H | -2.71942937 | 1.44245769  | -3.41851995 |   |             |            |             |
| C | 2.28173522  | 3.64897548  | -4.25661187 |   |             |            |             |
| H | 1.55643450  | 3.87013881  | -3.46617119 |   |             |            |             |
| H | 3.25032609  | 3.50261252  | -3.76275464 |   |             |            |             |

**Table 65.** Geometric coordinates and thermally corrected MP2 energies for IRC derived reactants leading to (*R,R*)-**6** from **5**  $D_{2d}$  tetramer

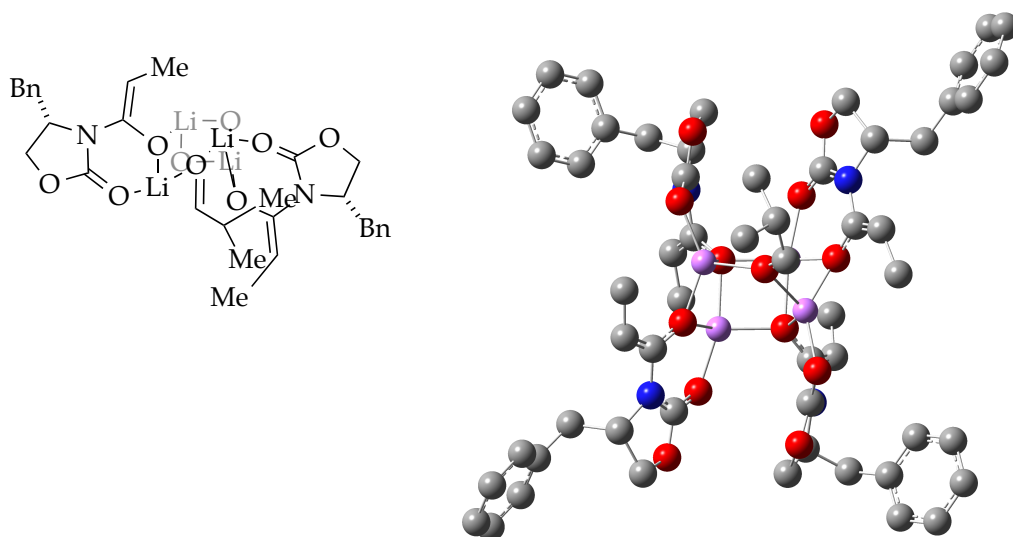

$G = -3399.005379$  Hartree

$G_{MP2} = -2126242.921$  kcal/mol

$\Delta G_{MP2} = 9.877340194$  kcal/mol vs. **5**  $D_{2d}$  tetramer and isobutyraldehyde

$\Delta G_{MP2} = -1.529003127$  kcal/mol vs. **5**  $D_{2d}$  tetramer transition state leading to (*R,R*)-**6**

| Atom | X           | Y           | Z          | Atom | X           | Y           | Z          |
|------|-------------|-------------|------------|------|-------------|-------------|------------|
| Li   | 0.00000000  | 0.00000000  | 0.00000000 | C    | -5.84026636 | -1.70929935 | 1.75809995 |
| Li   | 0.00000000  | 0.00000000  | 3.29458670 | H    | -5.57191226 | -2.30066442 | 0.87545927 |
| O    | 1.57333031  | 0.00000000  | 4.35246982 | H    | -6.91416199 | -1.77927457 | 1.93582290 |
| C    | 2.10600768  | 1.08460854  | 4.58943594 | C    | -4.99037403 | -2.07364704 | 2.97900139 |
| O    | 3.43538290  | 1.17311066  | 4.81265259 | H    | -4.63611558 | -3.10374123 | 2.90316156 |
| C    | 3.80929676  | 2.56536249  | 4.90016543 | N    | -3.87138781 | -1.13382825 | 2.80133585 |
| H    | 4.31464344  | 2.84676101  | 3.97277985 | C    | -2.62066075 | -1.19970663 | 3.55230149 |
| H    | 4.49135439  | 2.66803015  | 5.74607142 | C    | -2.35207021 | -2.34579828 | 4.25114408 |
| C    | 2.48419818  | 3.33519345  | 5.09008972 | H    | -3.05932954 | -3.16717935 | 4.22419834 |
| H    | 2.41783029  | 4.17451806  | 4.39214520 | C    | -1.23865380 | -2.46445815 | 5.25772137 |
| N    | 1.51656747  | 2.30881603  | 4.67899997 | H    | -0.58362707 | -1.58814330 | 5.25256334 |
| C    | 0.20067518  | 2.57123604  | 4.12038935 | H    | -1.63416463 | -2.55896548 | 6.28066304 |
| C    | -0.61844659 | 3.46298707  | 4.72056520 | H    | -0.60842983 | -3.35159731 | 5.09389410 |
| H    | -0.33044051 | 3.89898690  | 5.66854477 | O    | -1.87524342 | -0.15262596 | 3.46704125 |
| C    | -1.95282190 | 3.85558397  | 4.14520296 | C    | -5.72045474 | -1.85602056 | 4.32720710 |
| H    | -2.75030391 | 3.14119896  | 4.40229471 | H    | -4.96796857 | -1.89871285 | 5.12124317 |
| H    | -2.27084612 | 4.83509170  | 4.52049071 | H    | -6.13703335 | -0.84128766 | 4.33204514 |
| H    | -1.91928644 | 3.92542371  | 3.05010393 | C    | -6.81376158 | -2.87276890 | 4.57271248 |
| O    | -0.06318286 | 1.90543888  | 3.01343719 | C    | -6.49343717 | -4.19151668 | 4.92974346 |
| Li   | -1.85634873 | 1.36790494  | 2.24475180 | C    | -7.49319266 | -5.14232317 | 5.13212757 |
| O    | -3.73267753 | 1.00136134  | 1.80589691 | C    | -8.83677042 | -4.79038710 | 4.98236924 |
| C    | -4.27802391 | -0.06844021 | 2.04300988 | C    | -9.17061423 | -3.48185292 | 4.63287110 |
| O    | -5.50783960 | -0.33071201 | 1.50376437 | C    | -8.16593073 | -2.53321194 | 4.42983652 |

|    |              |             |             |   |             |             |             |
|----|--------------|-------------|-------------|---|-------------|-------------|-------------|
| H  | -8.43507125  | -1.51126383 | 4.17078084  | C | 2.46678907  | -1.21174322 | -1.80327961 |
| H  | -10.21316953 | -3.19537262 | 4.52234087  | H | 2.38623866  | -2.11915166 | -1.18125382 |
| H  | -9.61657497  | -5.52981312 | 5.14309689  | H | 1.44612617  | -0.85227035 | -1.98205779 |
| H  | -7.22402436  | -6.15716900 | 5.41307656  | H | 2.86642801  | -1.53444096 | -2.77241330 |
| H  | -5.45032646  | -4.47191551 | 5.06220429  | H | 4.38324453  | -0.14513030 | -1.48778635 |
| O  | -1.02032773  | 1.60783093  | 0.48219084  | O | 1.67235645  | 0.81206142  | 0.19803769  |
| C  | -1.58958081  | 2.24187751  | -0.52378707 | C | 5.40061027  | 2.52274325  | -1.49805116 |
| N  | -2.49286865  | 1.42347720  | -1.31846820 | H | 4.75978591  | 2.00761934  | -2.22058206 |
| C  | -2.26019171  | 0.10111104  | -1.53081483 | H | 5.02129793  | 3.54794236  | -1.40572073 |
| O  | -1.19985988  | -0.51254390 | -1.41020682 | C | 6.83810799  | 2.53774713  | -1.96976180 |
| O  | -3.38915077  | -0.53261215 | -1.92128364 | C | 7.60769511  | 3.70783199  | -1.91631378 |
| C  | -4.50309034  | 0.38238693  | -1.83085412 | C | 8.94265809  | 3.71019250  | -2.32680613 |
| H  | -5.10784163  | 0.10165932  | -0.96485449 | C | 9.53156325  | 2.53668517  | -2.79797548 |
| H  | -5.08612388  | 0.27868876  | -2.74778570 | C | 8.77578933  | 1.36350161  | -2.86032290 |
| C  | -3.87391265  | 1.78409510  | -1.66903853 | C | 7.44283543  | 1.36618225  | -2.45094470 |
| H  | -4.31786034  | 2.31508053  | -0.82222561 | H | 6.85949054  | 0.44987225  | -2.51484057 |
| C  | -4.03385299  | 2.66145516  | -2.93801647 | H | 9.22370182  | 0.44623427  | -3.23366897 |
| H  | -5.11268668  | 2.82278812  | -3.06540090 | H | 10.56954051 | 2.53599819  | -3.11957893 |
| H  | -3.60414262  | 3.64652734  | -2.73254997 | H | 9.51931350  | 4.63039770  | -2.28140770 |
| C  | -3.45405988  | 2.08350363  | -4.21170410 | H | 7.15195883  | 4.62991339  | -1.56132607 |
| C  | -4.29242214  | 1.55978114  | -5.20571974 | C | 2.30655024  | 3.87668105  | 6.53260633  |
| C  | -3.76680063  | 1.01417084  | -6.37845506 | H | 3.11635039  | 4.60138971  | 6.69096998  |
| C  | -2.38644492  | 0.98499398  | -6.57651994 | H | 1.37618926  | 4.45119678  | 6.57441533  |
| C  | -1.53916818  | 1.51031932  | -5.59847847 | C | 2.33428327  | 2.83357742  | 7.62949561  |
| C  | -2.06692074  | 2.05715095  | -4.42863381 | C | 3.46537727  | 2.67764196  | 8.44262342  |
| H  | -1.39704006  | 2.46759615  | -3.67804833 | C | 3.50263141  | 1.70859788  | 9.44692786  |
| H  | -0.46251572  | 1.49789552  | -5.74595447 | C | 2.40170971  | 0.87818080  | 9.65620942  |
| H  | -1.97320768  | 0.56111156  | -7.48788710 | C | 1.26424274  | 1.02821227  | 8.85984204  |
| H  | -4.43669394  | 0.61639389  | -7.13647394 | C | 1.22902047  | 1.99811942  | 7.85774796  |
| H  | -5.37138769  | 1.59016049  | -5.06541645 | H | 0.33663602  | 2.10943046  | 7.24761025  |
| C  | -1.43678184  | 3.54794263  | -0.84056455 | H | 0.39862437  | 0.39085140  | 9.01998049  |
| H  | -1.89578095  | 3.92731913  | -1.74495813 | H | 2.42670832  | 0.12322596  | 10.43754740 |
| C  | -0.62696698  | 4.51650611  | -0.02201638 | H | 4.38977005  | 1.60703500  | 10.06675067 |
| H  | 0.40877541   | 4.61701001  | -0.38068848 | H | 4.32332510  | 3.33112397  | 8.29607321  |
| H  | -1.06868256  | 5.52037063  | -0.05082109 | O | -0.04212030 | -1.34926349 | 1.67171787  |
| H  | -0.57566922  | 4.21790487  | 1.03152066  | C | -0.06366073 | -2.50966424 | 2.08260297  |
| Li | 0.77588247   | 2.12712690  | 1.26604053  | C | -0.53045406 | -3.71773612 | 1.30970013  |
| O  | 2.41104459   | 3.13366451  | 1.52339673  | H | -0.92226585 | -4.41236047 | 2.06508254  |
| C  | 3.49727924   | 2.73986248  | 1.11074446  | C | 0.72114977  | -4.37763432 | 0.67890303  |
| O  | 4.63904260   | 3.38253971  | 1.51156385  | H | 0.43954349  | -5.32875010 | 0.21494275  |
| C  | 5.77704953   | 2.62963949  | 1.04606202  | H | 1.14988477  | -3.73185510 | -0.09444917 |
| H  | 6.13024457   | 1.98967437  | 1.86256477  | H | 1.49776523  | -4.58267482 | 1.42495235  |
| H  | 6.56285459   | 3.33164780  | 0.76345786  | C | -1.61682037 | -3.41762271 | 0.27493005  |
| C  | 5.22536999   | 1.81691833  | -0.12955587 | H | -1.91290318 | -4.34371072 | -0.23062730 |
| H  | 5.66994857   | 0.81974633  | -0.15695317 | H | -2.50281621 | -2.99406374 | 0.75990260  |
| N  | 3.81294468   | 1.72150402  | 0.26293158  | H | -1.28134899 | -2.70469816 | -0.48203704 |
| C  | 2.87807338   | 0.73618009  | -0.27539993 | H | 0.37688418  | -2.72443978 | 3.07088644  |
| C  | 3.34253014   | -0.15443672 | -1.19059743 |   |             |             |             |

**Table 66.** Geometric coordinates and thermally corrected MP2 energies for IRC derived products leading to (*R,R*)-**6** from **5**  $D_{2d}$  tetramer

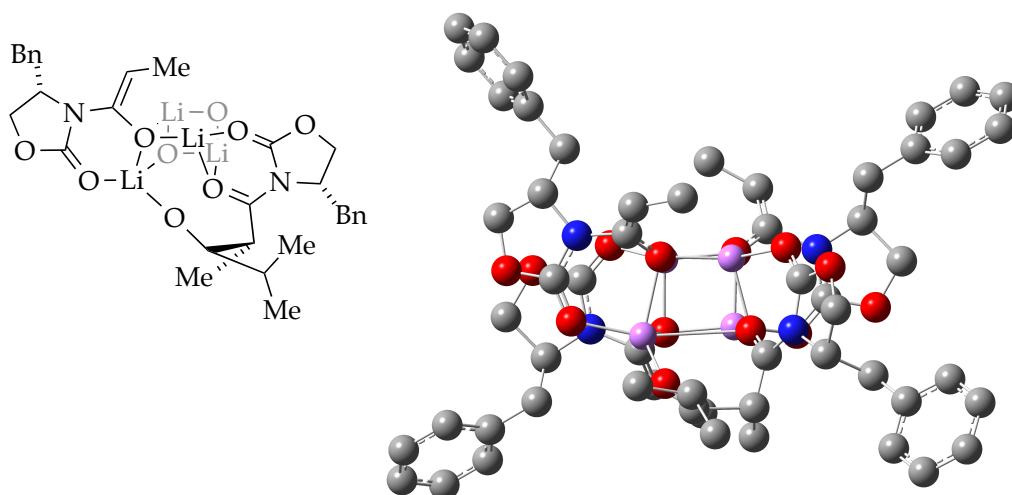

$G = -3399.015094$  Hartree

$G_{MP2} = -2126252.022$  kcal/mol

$\Delta G_{MP2} = 0.776340132$  kcal/mol vs. **5**  $D_{2d}$  tetramer and isobutyraldehyde

$\Delta G_{MP2} = -10.63000319$  kcal/mol vs. **5**  $D_{2d}$  tetramer transition state leading to (*R,R*)-**6**

| Atom | X           | Y          | Z           | Atom | X           | Y           | Z           |
|------|-------------|------------|-------------|------|-------------|-------------|-------------|
| Li   | 0.00000000  | 0.00000000 | 0.00000000  | N    | -3.88711630 | 2.41452661  | -3.19196083 |
| Li   | 0.00000000  | 0.00000000 | -2.78808210 | C    | -3.36465866 | 1.09284294  | -3.19473608 |
| O    | 1.97770507  | 0.00000000 | -2.95852207 | O    | -2.76840016 | 0.69559365  | -2.18202072 |
| C    | 2.72302878  | 0.59546613 | -2.19049891 | Li   | -2.30580695 | -0.83662001 | -0.92099834 |
| O    | 4.02550045  | 0.22789634 | -2.04629177 | O    | -3.97655309 | -1.35570534 | -0.14139263 |
| C    | 4.61057665  | 0.97655010 | -0.95888487 | C    | -4.49917298 | -0.63009677 | 0.69959695  |
| H    | 4.69694600  | 0.30482554 | -0.10018435 | O    | -5.84445075 | -0.62568358 | 0.87258464  |
| H    | 5.60235061  | 1.30971645 | -1.26805572 | C    | -6.19590412 | 0.39406930  | 1.82720553  |
| C    | 3.63067268  | 2.13765635 | -0.68493838 | H    | -6.62982601 | 1.23954337  | 1.28163857  |
| N    | 2.43681675  | 1.65155234 | -1.38463106 | H    | -6.94374982 | -0.01421587 | 2.50815443  |
| C    | 1.14944133  | 2.33138464 | -1.41026629 | C    | -4.87453314 | 0.78055947  | 2.52082310  |
| C    | 1.16389923  | 3.67226772 | -1.57663068 | N    | -3.90253777 | 0.23986763  | 1.56223446  |
| H    | 2.11822018  | 4.14842382 | -1.78190969 | C    | -2.45784370 | 0.35846054  | 1.69041987  |
| C    | -0.05457405 | 4.55051800 | -1.54184709 | C    | -1.92068271 | 0.41465098  | 2.92814075  |
| H    | -0.58635716 | 4.57568634 | -2.50599228 | H    | -2.57005828 | 0.26677686  | 3.78588316  |
| H    | 0.21756133  | 5.58548994 | -1.30345483 | C    | -0.45719729 | 0.64082205  | 3.19041123  |
| H    | -0.78102123 | 4.22635529 | -0.78795699 | H    | 0.11777379  | -0.29476869 | 3.23361658  |
| O    | 0.11178171  | 1.53973439 | -1.23209388 | H    | -0.30581738 | 1.15920704  | 4.14507350  |
| Li   | -1.75578234 | 1.78673639 | -0.82118387 | H    | -0.00130592 | 1.25732825  | 2.40627544  |
| O    | -3.10023605 | 3.17471036 | -1.10355915 | O    | -1.81782515 | 0.43786503  | 0.54156198  |
| C    | -3.72588645 | 3.31153945 | -2.13956040 | C    | -4.72668920 | 2.29285925  | 2.76526715  |
| O    | -4.39912308 | 4.44895975 | -2.40889660 | H    | -4.80819323 | 2.81107112  | 1.80230347  |
| C    | -4.85448646 | 4.42195995 | -3.77945821 | H    | -3.71441753 | 2.47502027  | 3.14092272  |
| H    | -5.82502456 | 4.91567128 | -3.82702705 | C    | -5.76015058 | 2.81542095  | 3.74160458  |
| H    | -4.12912039 | 4.96801144 | -4.39063877 | C    | -5.65889546 | 2.52558334  | 5.11097032  |
| C    | -4.90786672 | 2.93050395 | -4.12983282 | C    | -6.62238705 | 2.97684158  | 6.01248238  |

|   |             |             |             |   |              |             |             |
|---|-------------|-------------|-------------|---|--------------|-------------|-------------|
| C | -7.70700110 | 3.73207539  | 5.56046408  | H | 0.40914383   | 1.96700634  | -5.36793118 |
| C | -7.81648673 | 4.03452293  | 4.20304388  | C | -2.59926505  | 2.00050906  | -7.09142813 |
| C | -6.85045196 | 3.57878327  | 3.30347354  | H | -2.47818003  | 2.98937477  | -7.55052009 |
| H | -6.93654875 | 3.83003288  | 2.24844208  | H | -3.66885117  | 1.86572680  | -6.88419681 |
| H | -8.65141272 | 4.62960276  | 3.84228927  | H | -2.32670815  | 1.25366223  | -7.84813363 |
| H | -8.45643027 | 4.08722923  | 6.26255005  | H | -2.01169659  | -0.29304078 | -5.97575115 |
| H | -6.52302758 | 2.74437295  | 7.06952195  | C | -6.29174973  | 2.28619445  | -3.87585913 |
| H | -4.81054182 | 1.94984773  | 5.47522868  | H | -6.59221701  | 2.50779444  | -2.84436679 |
| H | -4.78283489 | 0.25100636  | 3.47909366  | H | -6.18055237  | 1.19824040  | -3.94684979 |
| O | -0.51559930 | -1.38322051 | -1.31961881 | C | -7.34819823  | 2.77133049  | -4.84598993 |
| C | 0.00033373  | -2.58435981 | -1.14437983 | C | -8.32606066  | 3.69255686  | -4.44792463 |
| N | 1.43458912  | -2.59465067 | -0.89109953 | C | -9.28393882  | 4.15671108  | -5.35191490 |
| C | 2.02993082  | -1.79464271 | 0.02350544  | C | -9.27662118  | 3.70457479  | -6.67152897 |
| O | 1.51737240  | -0.92304023 | 0.72885877  | C | -8.30990891  | 2.78285361  | -7.08033285 |
| O | 3.35780109  | -2.05590059 | 0.10289125  | C | -7.35576960  | 2.32075539  | -6.17455542 |
| C | 3.72158074  | -2.98167964 | -0.94733413 | H | -6.61529286  | 1.59302999  | -6.50057964 |
| H | 4.26352747  | -2.41854451 | -1.71118855 | H | -8.30205276  | 2.41889365  | -8.10412754 |
| H | 4.37278454  | -3.74404646 | -0.51743797 | H | -10.02207492 | 4.06252509  | -7.37617535 |
| C | 2.38658878  | -3.54406757 | -1.48360171 | H | -10.03726277 | 4.86701268  | -5.02205812 |
| H | 2.20653566  | -4.54859016 | -1.07808822 | H | -8.34705173  | 4.03947647  | -3.41680241 |
| C | 2.31106065  | -3.59320500 | -3.02084732 | H | -4.59330150  | 2.77021122  | -5.16030939 |
| C | 3.33643139  | -4.53803544 | -3.61135823 | C | 3.38665485   | 2.39776016  | 0.81267182  |
| C | 4.47396288  | -4.04765804 | -4.26734971 | H | 3.00998636   | 1.47210345  | 1.26229784  |
| C | 5.43064192  | -4.91877115 | -4.79296376 | H | 2.59329093   | 3.14950451  | 0.89379057  |
| C | 5.26572959  | -6.29864512 | -4.66904792 | C | 4.63768416   | 2.86918814  | 1.52391743  |
| C | 4.13509290  | -6.80152319 | -4.02090961 | C | 5.11417375   | 4.17678184  | 1.34372429  |
| C | 3.18081039  | -5.92836471 | -3.49950343 | C | 6.28326865   | 4.60686936  | 1.97089595  |
| H | 2.29575074  | -6.32990070 | -3.00990755 | C | 6.99823435   | 3.73476616  | 2.79509691  |
| H | 3.99283137  | -7.87522573 | -3.92780472 | C | 6.53238523   | 2.43399051  | 2.98878674  |
| H | 6.00802843  | -6.97801089 | -5.07963649 | C | 5.36218029   | 2.00662509  | 2.35779614  |
| H | 6.30230298  | -4.51721373 | -5.30341309 | H | 4.99921527   | 0.99451005  | 2.52212607  |
| H | 4.60249871  | -2.97331077 | -4.37808589 | H | 7.07660065   | 1.75026291  | 3.63519448  |
| H | 1.29764920  | -3.90586903 | -3.29544971 | H | 7.90754612   | 4.06958919  | 3.28711329  |
| H | 2.45016495  | -2.57648044 | -3.40320983 | H | 6.63310832   | 5.62511918  | 1.82126944  |
| C | -0.62482556 | -3.78086452 | -1.19547465 | H | 4.55655178   | 4.86685343  | 0.71363674  |
| C | -2.07474849 | -3.97686723 | -1.53595991 | H | 3.99210749   | 3.06130522  | -1.15751073 |
| H | -2.71604937 | -4.04693323 | -0.64540803 |   |              |             |             |
| H | -2.22190384 | -4.90088034 | -2.10963616 |   |              |             |             |
| H | -2.46086203 | -3.15399650 | -2.14643793 |   |              |             |             |
| H | -0.04524803 | -4.66841358 | -0.95694863 |   |              |             |             |
| C | -3.41469424 | 0.31033221  | -4.43110421 |   |              |             |             |
| H | -4.14917997 | 0.69173349  | -5.14049853 |   |              |             |             |
| C | -3.61447972 | -1.18704541 | -4.18148761 |   |              |             |             |
| H | -4.47234432 | -1.39925371 | -3.53255243 |   |              |             |             |
| H | -2.71180173 | -1.60086749 | -3.72591691 |   |              |             |             |
| H | -3.77295670 | -1.69685978 | -5.13759519 |   |              |             |             |
| C | -1.86140037 | 0.45572375  | -5.15866853 |   |              |             |             |
| O | -0.91651834 | 0.13614714  | -4.30743393 |   |              |             |             |
| C | -1.70680707 | 1.85094222  | -5.84895687 |   |              |             |             |
| H | -1.96486585 | 2.63514905  | -5.11923327 |   |              |             |             |
| C | -0.23749835 | 2.06274315  | -6.24225991 |   |              |             |             |
| H | -0.09218441 | 3.05277980  | -6.69356872 |   |              |             |             |
| H | 0.08069243  | 1.30936016  | -6.97479839 |   |              |             |             |

**Table 67.** Geometric coordinates and thermally corrected MP2 energies for IRC derived reactants leading to (*S,S*)-6 from 5  $D_{2d}$  tetramer

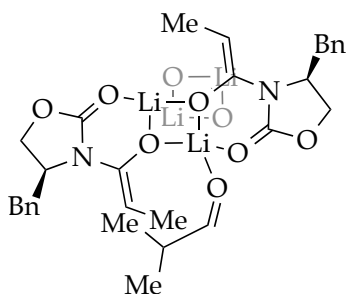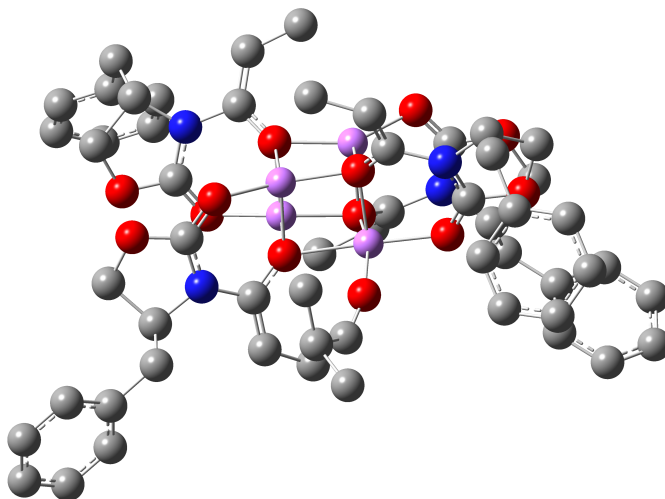

$G = -3399.016015$  Hartree

$G_{MP2} = -2126257.688$  kcal/mol

$\Delta G_{MP2} = -4.889474051$  kcal/mol vs. 5  $D_{2d}$  tetramer and isobutyraldehyde

$\Delta G_{MP2} = -9.661641118$  kcal/mol vs. 5  $D_{2d}$  tetramer transition state leading to (*S,S*)-6

| Atom | X          | Y           | Z           | Atom | X           | Y           | Z           |
|------|------------|-------------|-------------|------|-------------|-------------|-------------|
| Li   | 0.00000000 | 0.00000000  | 0.00000000  | H    | 0.27397654  | 0.20016564  | -6.78810880 |
| O    | 0.00000000 | 0.00000000  | 1.97101150  | H    | 0.78433276  | 1.86173523  | -7.23029480 |
| C    | 1.03129947 | 0.00000000  | 2.63197589  | C    | -0.41487790 | 1.72988456  | -5.37807635 |
| O    | 0.97213543 | -0.07735951 | 3.98949181  | H    | -1.41196796 | 1.31030080  | -5.52803945 |
| C    | 2.30465226 | -0.25731178 | 4.50563727  | N    | 0.16061270  | 1.18436592  | -4.13908956 |
| H    | 2.45368837 | -1.32367894 | 4.70301139  | C    | -0.61405045 | 0.86261783  | -2.94790578 |
| H    | 2.38391519 | 0.31423293  | 5.43173707  | C    | -1.87861783 | 1.35566761  | -2.84564347 |
| C    | 3.21967336 | 0.25718325  | 3.38375090  | H    | -2.26516427 | 2.00965675  | -3.61873049 |
| H    | 4.09008417 | -0.39317918 | 3.25911749  | C    | -2.84295552 | 0.94275192  | -1.76804558 |
| N    | 2.33512590 | 0.08250695  | 2.22607967  | H    | -2.41554409 | 0.17026738  | -1.12183197 |
| C    | 2.81274054 | -0.08784904 | 0.86767710  | H    | -3.15252383 | 1.78152808  | -1.12494649 |
| C    | 4.12044767 | 0.13094992  | 0.58564589  | H    | -3.76641638 | 0.53036854  | -2.19888484 |
| H    | 4.79822914 | 0.47676304  | 1.35510454  | O    | -0.01465610 | 0.08101197  | -2.09546548 |
| C    | 4.68870153 | -0.07862616 | -0.79405251 | Li   | -0.29967829 | -1.85248001 | -2.20238218 |
| H    | 4.44836582 | 0.74130877  | -1.48850723 | O    | -0.42206120 | -2.36613049 | -4.05777788 |
| H    | 5.78146688 | -0.15029418 | -0.75543637 | C    | 0.59454042  | -2.59683174 | -4.70378703 |
| H    | 4.32530616 | -1.00613759 | -1.25651918 | O    | 0.65051150  | -2.29818864 | -6.03140773 |
| O    | 1.90900893 | -0.49741887 | 0.00726989  | C    | 1.99721746  | -2.51495120 | -6.50252704 |
| Li   | 1.87281694 | -0.41890267 | -1.92714780 | H    | 2.50004784  | -1.54426587 | -6.55891001 |
| O    | 2.33749016 | 0.54479689  | -3.52014489 | H    | 1.93263198  | -2.96335996 | -7.49541906 |
| C    | 1.47804422 | 0.87611834  | -4.33095805 | C    | 2.63425457  | -3.44097139 | -5.45108272 |
| O    | 1.79964990 | 1.00565862  | -5.64833582 | H    | 3.65590048  | -3.13105735 | -5.21260825 |
| C    | 0.57971079 | 1.17808277  | -6.40545214 | N    | 1.77463440  | -3.14771924 | -4.29716303 |



|    |             |             |             |   |             |             |             |
|----|-------------|-------------|-------------|---|-------------|-------------|-------------|
| C  | 2.18028276  | -3.25267994 | -2.90567774 | C | 0.48380729  | -5.97991061 | -5.14830395 |
| C  | 3.12829573  | -4.15134451 | -2.55429879 | H | 0.82201819  | -5.87819775 | -4.12010228 |
| H  | 3.50745902  | -4.84603724 | -3.29282162 | H | -1.39552096 | -6.86619618 | -4.59336777 |
| C  | 3.67924948  | -4.25686227 | -1.15724255 | H | -2.17604999 | -7.12231055 | -6.94230490 |
| H  | 3.06233345  | -4.88817815 | -0.50106692 | H | -0.70801473 | -6.39039003 | -8.81329210 |
| H  | 4.68547273  | -4.69211695 | -1.16825130 | H | 1.50932286  | -5.40555734 | -8.33722752 |
| H  | 3.75736880  | -3.27634071 | -0.67164197 | C | -0.47656070 | 3.27786718  | -5.36505558 |
| O  | 1.59618456  | -2.38751225 | -2.10620430 | H | -1.02054414 | 3.59008362  | -4.46712807 |
| Li | 1.31155908  | -2.37347546 | -0.19811719 | H | 0.54667750  | 3.66119979  | -5.26701732 |
| O  | 1.23140108  | -3.49144480 | 1.36691746  | C | -1.13257798 | 3.85318051  | -6.60229035 |
| C  | 0.25990822  | -3.27153888 | 2.09023909  | C | -2.51756266 | 3.73548185  | -6.79527374 |
| O  | 0.40370623  | -3.14235780 | 3.43161193  | C | -3.12638820 | 4.24157505  | -7.94306317 |
| C  | -0.89456261 | -2.92048496 | 4.02356480  | C | -2.35938317 | 4.87879973  | -8.92138646 |
| H  | -0.79907424 | -2.11560912 | 4.75167365  | C | -0.98211041 | 5.00684176  | -8.74103926 |
| H  | -1.20071498 | -3.84515725 | 4.52604581  | C | -0.37612794 | 4.49711693  | -7.59060515 |
| C  | -1.82287030 | -2.56879833 | 2.84522663  | H | 0.69717866  | 4.61022005  | -7.45264989 |
| H  | -1.88142399 | -1.48069620 | 2.72593397  | H | -0.37698250 | 5.50636537  | -9.49302241 |
| N  | -1.03781770 | -3.11860632 | 1.72050996  | H | -2.83356377 | 5.27563479  | -9.81487178 |
| C  | -1.38029089 | -2.90125658 | 0.31568492  | H | -4.20093419 | 4.14234861  | -8.07206486 |
| C  | -2.39100734 | -3.64015888 | -0.19356742 | H | -3.12646693 | 3.24899210  | -6.03585267 |
| C  | -2.92247457 | -3.48212605 | -1.59155936 | C | 3.71903032  | 1.71518185  | 3.58562994  |
| H  | -2.82980867 | -2.44837268 | -1.94731668 | H | 4.50422742  | 1.67720616  | 4.35187877  |
| H  | -2.40224679 | -4.12077543 | -2.32140902 | H | 4.20156377  | 2.03370678  | 2.65626701  |
| H  | -3.98577686 | -3.74721588 | -1.64081928 | C | 2.67000775  | 2.72768785  | 3.99451835  |
| H  | -2.82058878 | -4.41516217 | 0.43228776  | C | 2.61095280  | 3.19624560  | 5.31442964  |
| O  | -0.66073430 | -1.99139623 | -0.31000208 | C | 1.64457895  | 4.12309972  | 5.70931661  |
| C  | -3.23723021 | -3.15060170 | 2.98582281  | C | 0.71490697  | 4.59717428  | 4.78407069  |
| H  | -3.78376006 | -2.93681565 | 2.06113610  | C | 0.76568888  | 4.14306873  | 3.46444992  |
| H  | -3.16785763 | -4.24192728 | 3.07276323  | C | 1.73737756  | 3.22311169  | 3.06937761  |
| C  | -3.97346375 | -2.57520536 | 4.17945714  | H | 1.76386330  | 2.88088318  | 2.03831904  |
| C  | -4.20437556 | -3.34500038 | 5.32709510  | H | 0.04256595  | 4.50474647  | 2.73798488  |
| C  | -4.86704772 | -2.80723923 | 6.43260795  | H | -0.04115176 | 5.31671997  | 5.08685087  |
| C  | -5.30950641 | -1.48463203 | 6.40758296  | H | 1.62101384  | 4.47420429  | 6.73773600  |
| C  | -5.08796636 | -0.70605835 | 5.26909184  | H | 3.33826021  | 2.83846630  | 6.04081488  |
| C  | -4.42813313 | -1.24768806 | 4.16653689  | O | 0.11254866  | 2.16060193  | -0.10318604 |
| H  | -4.26800192 | -0.63544831 | 3.28162781  | C | -0.38315900 | 3.13781099  | -0.63467762 |
| H  | -5.43314638 | 0.32412524  | 5.23789812  | C | 0.40019048  | 4.26746416  | -1.27006900 |
| H  | -5.82654291 | -1.06384038 | 7.26584635  | H | -0.00108272 | 4.34608333  | -2.29295537 |
| H  | -5.03942766 | -3.42425958 | 7.31075511  | C | 1.90346782  | 3.99186547  | -1.32988584 |
| H  | -3.87093804 | -4.38032051 | 5.35138774  | H | 2.11628067  | 3.05691167  | -1.85667432 |
| C  | 2.66293479  | -4.92973390 | -5.89603620 | H | 2.41812956  | 4.80827607  | -1.84870897 |
| H  | 3.29981126  | -4.97195772 | -6.78970647 | H | 2.32862460  | 3.90859374  | -0.32428422 |
| H  | 3.17589179  | -5.51544535 | -5.12785188 | C | 0.05982776  | 5.58718767  | -0.54481125 |
| C  | 1.31483560  | -5.54883371 | -6.19419326 | H | 0.45601068  | 5.58392008  | 0.47728324  |
| C  | 0.86781457  | -5.71038037 | -7.51245025 | H | 0.50579376  | 6.43551531  | -1.07434290 |
| C  | -0.38120238 | -6.27172956 | -7.78345770 | H | -1.02241472 | 5.75585151  | -0.49203752 |
| C  | -1.20346612 | -6.68424785 | -6.73468359 | H | -1.48329185 | 3.26720237  | -0.64328571 |
| C  | -0.76567491 | -6.53926287 | -5.41638648 |   |             |             |             |

**Table 68.** Geometric coordinates and thermally corrected MP2 energies for IRC derived products leading to (*S,S*)-6 from 5  $D_{2d}$  tetramer

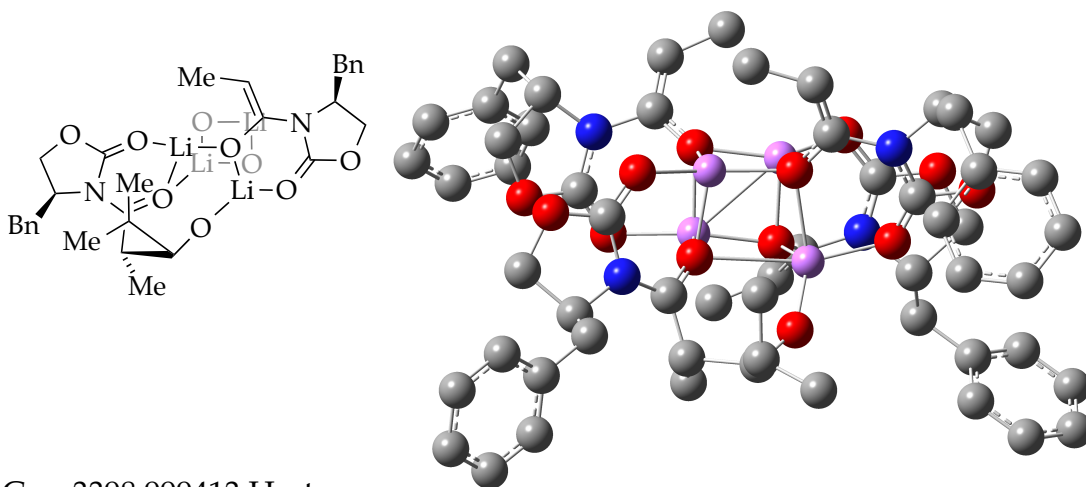

G = -3398.999413 Hartree

$G_{MP2} = -2126249.961$  kcal/mol

$\Delta G_{MP2} = -1.93514677$  kcal/mol vs. 5  $D_{2d}$  tetramer and isobutyraldehyde

$\Delta G_{MP2} = 2.837020297$  kcal/mol vs. 5  $D_{2d}$  tetramer transition state leading to (*S,S*)-6

| Atom | X          | Y           | Z           | Atom | X           | Y           | Z           |
|------|------------|-------------|-------------|------|-------------|-------------|-------------|
| Li   | 0.00000000 | 0.00000000  | 0.00000000  | N    | 1.40441843  | 1.18001847  | -4.21525662 |
| O    | 0.00000000 | 0.00000000  | 1.95951270  | C    | 0.43295532  | 0.78689332  | -3.25936435 |
| C    | 0.95974281 | 0.00000000  | 2.71598256  | C    | -0.86160850 | 1.47080999  | -3.19631615 |
| O    | 0.76723697 | 0.00826473  | 4.06211309  | H    | -0.97168342 | 2.22107808  | -3.98360017 |
| C    | 2.02432467 | -0.22863516 | 4.71765698  | C    | -2.03015312 | 0.47245655  | -3.22859780 |
| H    | 2.07472417 | -1.28806042 | 4.98962454  | H    | -2.01683604 | -0.13371882 | -2.31926614 |
| H    | 2.05674934 | 0.39174702  | 5.61453554  | H    | -2.97521740 | 1.02554522  | -3.25241329 |
| C    | 3.08325017 | 0.15051379  | 3.66996244  | H    | -1.99613893 | -0.18699909 | -4.10424275 |
| H    | 3.89614335 | -0.58142315 | 3.66244478  | O    | 0.73437648  | -0.11868136 | -2.46566655 |
| N    | 2.30156558 | -0.00116674 | 2.43585029  | Li   | 0.25090795  | -2.07864649 | -2.28161953 |
| C    | 2.89874385 | -0.24475158 | 1.14057701  | O    | 0.47298684  | -2.57228465 | -4.13643001 |
| C    | 4.24964730 | -0.20289402 | 1.01329947  | C    | 1.60260592  | -2.80620696 | -4.55736557 |
| H    | 4.87719249 | 0.04367271  | 1.85865963  | O    | 1.96071440  | -2.43822349 | -5.81696184 |
| C    | 4.93911801 | -0.48698277 | -0.29592842 | C    | 3.36853568  | -2.70345596 | -6.00266946 |
| H    | 4.79004938 | 0.30561082  | -1.04615627 | H    | 3.90502164  | -1.75223872 | -5.93954503 |
| H    | 6.02124901 | -0.57380791 | -0.14997248 | H    | 3.49345350  | -3.13881493 | -6.99560624 |
| H    | 4.61136237 | -1.43380232 | -0.75121977 | C    | 3.74744587  | -3.66894293 | -4.86190663 |
| O    | 2.05928114 | -0.53433508 | 0.16881243  | H    | 4.68563480  | -3.37123882 | -4.38431381 |
| Li   | 2.48691326 | -0.68414307 | -1.70036114 | N    | 2.64424086  | -3.41530147 | -3.92573808 |
| O    | 3.30659052 | 0.11561395  | -3.33202877 | C    | 2.72160971  | -3.55176773 | -2.47925168 |
| C    | 2.68927707 | 0.64638438  | -4.23785673 | C    | 3.45380517  | -4.55051944 | -1.94007368 |
| O    | 3.22732226 | 0.81280714  | -5.46421633 | H    | 3.88158238  | -5.30449558 | -2.58882119 |
| C    | 2.18785458 | 1.23983354  | -6.37970406 | C    | 3.68716729  | -4.68958140 | -0.45944932 |
| H    | 1.79016396 | 0.34902091  | -6.87473404 | H    | 2.85916780  | -5.19680675 | 0.05578620  |
| H    | 2.63685621 | 1.91289347  | -7.10945220 | H    | 4.59530195  | -5.27106528 | -0.26307684 |
| C    | 1.15005939 | 1.91715543  | -5.47308641 | H    | 3.81267680  | -3.71535790 | 0.02921279  |
| H    | 0.13681465 | 1.70832865  | -5.82094143 | O    | 2.08524548  | -2.60611424 | -1.81719692 |

|    |             |             |             |   |             |            |             |
|----|-------------|-------------|-------------|---|-------------|------------|-------------|
| Li | 1.42838931  | -2.40312349 | 0.00834436  | C | 1.87730311  | 5.36708293 | -8.58918621 |
| O  | 1.03612724  | -3.44477429 | 1.57814056  | C | 2.13625510  | 4.69345577 | -7.39352133 |
| C  | -0.04228914 | -3.14623469 | 2.09528017  | H | 3.16367901  | 4.56924281 | -7.05754551 |
| O  | -0.14484373 | -2.93628546 | 3.42640412  | H | 2.70325865  | 5.75400204 | -9.17990787 |
| C  | -1.51070568 | -2.58765888 | 3.74645072  | H | 0.35840380  | 6.07427881 | -9.94734505 |
| H  | -1.48768463 | -1.71669690 | 4.40059026  | H | -1.51837160 | 5.20248600 | -8.56646488 |
| H  | -1.96189902 | -3.43763748 | 4.27055272  | H | -1.05710810 | 4.02063167 | -6.44703558 |
| C  | -2.19345068 | -2.31308273 | 2.39075426  | C | 3.69602867  | 1.56429098 | 3.86776418  |
| H  | -2.18741107 | -1.23815032 | 2.17890795  | H | 4.36104780  | 1.49915484 | 4.73907430  |
| N  | -1.23885796 | -2.97532936 | 1.47744220  | H | 4.33040345  | 1.77930105 | 3.00235938  |
| C  | -1.30214156 | -2.86898668 | 0.02388572  | C | 2.70536101  | 2.69031912 | 4.07043535  |
| C  | -2.20309765 | -3.64787870 | -0.61374328 | C | 2.44078259  | 3.19008969 | 5.35339548  |
| C  | -2.44729670 | -3.61271915 | -2.09695950 | C | 1.51749957  | 4.21848616 | 5.54891110  |
| H  | -2.26853113 | -2.61485516 | -2.51591858 | C | 0.84356033  | 4.76728078 | 4.45767000  |
| H  | -1.80773426 | -4.31665150 | -2.65148303 | C | 1.10622737  | 4.28815299 | 3.17269183  |
| H  | -3.48515169 | -3.87849810 | -2.33191377 | C | 2.03236565  | 3.26270948 | 2.98060247  |
| H  | -2.76164597 | -4.36524126 | -0.02193557 | H | 2.23714063  | 2.90575719 | 1.97469342  |
| O  | -0.45660046 | -2.00997474 | -0.51776747 | H | 0.59165911  | 4.71231506 | 2.31526600  |
| C  | -3.62983492 | -2.84854996 | 2.30621642  | H | 0.12299901  | 5.56723078 | 4.60569613  |
| H  | -3.98097548 | -2.71143252 | 1.27772576  | H | 1.32905637  | 4.59170509 | 6.55232609  |
| H  | -3.62113064 | -3.92798065 | 2.50227364  | H | 2.97293187  | 2.77707766 | 6.20849602  |
| C  | -4.55760973 | -2.14562939 | 3.27766101  | O | -0.81268333 | 1.46787543 | -0.67875053 |
| C  | -5.04750626 | -2.80210330 | 4.41411665  | C | -1.00250071 | 2.27383852 | -1.70067216 |
| C  | -5.88601683 | -2.14557178 | 5.31769434  | C | -0.16762557 | 3.59468643 | -1.66433361 |
| C  | -6.24662529 | -0.81619808 | 5.09764925  | H | -0.27667133 | 4.10403410 | -2.63657471 |
| C  | -5.76660444 | -0.15002944 | 3.96742311  | C | 1.31994046  | 3.36692772 | -1.37241888 |
| C  | -4.93212437 | -0.80971226 | 3.06591583  | H | 1.82924090  | 2.82000059 | -2.17386793 |
| H  | -4.56933898 | -0.28405702 | 2.18527493  | H | 1.84747176  | 4.32031800 | -1.24440466 |
| H  | -6.04457226 | 0.88475493  | 3.78533055  | H | 1.42953957  | 2.78208771 | -0.45393494 |
| H  | -6.89916882 | -0.30287298 | 5.79892033  | C | -0.77834248 | 4.51338627 | -0.59275441 |
| H  | -6.25813993 | -2.67509925 | 6.19107180  | H | -0.74382347 | 4.01681672 | 0.38312261  |
| H  | -4.77657507 | -3.84130265 | 4.58865471  | H | -0.23569362 | 5.46478443 | -0.52423611 |
| C  | 3.88718434  | -5.13960977 | -5.34152109 | H | -1.82872469 | 4.73976596 | -0.81370803 |
| H  | 4.71059988  | -5.14937897 | -6.06809634 | H | -2.06488613 | 2.59684275 | -1.83486238 |
| H  | 4.22000974  | -5.75168153 | -4.49814289 |   |             |            |             |
| C  | 2.64582300  | -5.74276377 | -5.96208525 |   |             |            |             |
| C  | 2.52043009  | -5.86572288 | -7.35253193 |   |             |            |             |
| C  | 1.36914420  | -6.40982375 | -7.92478326 |   |             |            |             |
| C  | 0.32314960  | -6.84374747 | -7.11023094 |   |             |            |             |
| C  | 0.43948280  | -6.73772010 | -5.72250276 |   |             |            |             |
| C  | 1.59162779  | -6.19529185 | -5.15297927 |   |             |            |             |
| H  | 1.67760930  | -6.12437959 | -4.07161980 |   |             |            |             |
| H  | -0.36626645 | -7.08205102 | -5.07981583 |   |             |            |             |
| H  | -0.57392614 | -7.26872196 | -7.55236190 |   |             |            |             |
| H  | 1.29354729  | -6.49902168 | -9.00538083 |   |             |            |             |
| H  | 3.33852026  | -5.54532586 | -7.99502030 |   |             |            |             |
| C  | 1.36680690  | 3.43937481  | -5.32403996 |   |             |            |             |
| H  | 0.71664204  | 3.80266573  | -4.52186018 |   |             |            |             |
| H  | 2.39863130  | 3.61398287  | -4.99617071 |   |             |            |             |
| C  | 1.08921586  | 4.19150200  | -6.60927051 |   |             |            |             |
| C  | -0.22834378 | 4.38633318  | -7.05011785 |   |             |            |             |
| C  | -0.49084697 | 5.05722182  | -8.24413656 |   |             |            |             |
| C  | 0.56260625  | 5.54833678  | -9.01885145 |   |             |            |             |

**Table 69.** Geometric coordinates and thermally corrected MP2 energies for IRC derived reactants leading to (*R,S*)-**6** from LDA **5** mixed dimer with three THF

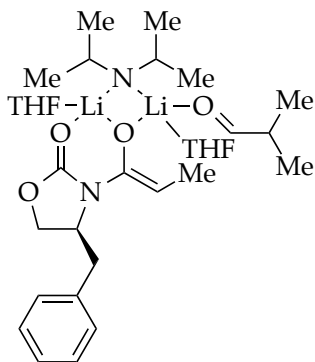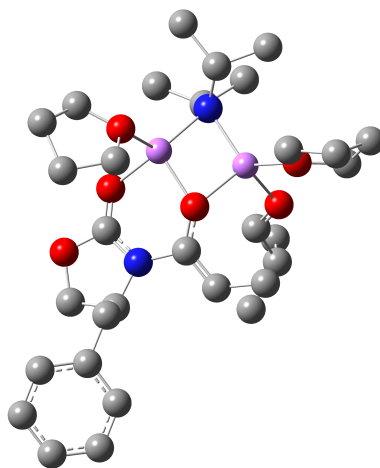

$G = -1787.934854$  Hartree

$G_{\text{MP2}} = -1118239.454$  kcal/mol

$\Delta G_{\text{MP2}} = -1.953107779$  kcal/mol vs. **5** LDA mixed dimer with three THF and isobutyraldehyde

$\Delta G_{\text{MP2}} = -6.174167071$  kcal/mol vs. **5** LDA mixed dimer transition state leading to (*R,S*)-**6**

| Atom | X          | Y           | Z           | Atom | X           | Y           | Z           |
|------|------------|-------------|-------------|------|-------------|-------------|-------------|
| Li   | 0.00000000 | 0.00000000  | 0.00000000  | H    | 3.70444616  | -1.19294485 | -0.45336289 |
| Li   | 0.00000000 | 0.00000000  | 2.51047440  | H    | 3.11967699  | -2.82232129 | -0.09420273 |
| N    | 1.57076076 | 0.00000000  | 1.24282335  | O    | -0.29342132 | -1.58483309 | 3.75381888  |
| C    | 2.33667709 | 1.25126730  | 1.21659268  | C    | -0.64372302 | -2.65975522 | 3.29136529  |
| H    | 1.57853299 | 2.02776914  | 1.00811192  | C    | -1.01275200 | -3.86115149 | 4.12614272  |
| C    | 2.98588796 | 1.69183394  | 2.55920379  | H    | -1.14293685 | -3.51137495 | 5.15700015  |
| H    | 3.86866289 | 1.09629404  | 2.81351655  | C    | 0.16157515  | -4.86318599 | 4.07657083  |
| H    | 3.30558118 | 2.74380601  | 2.51141186  | H    | -0.08314822 | -5.75415926 | 4.66547991  |
| H    | 2.26556429 | 1.58953712  | 3.37794451  | H    | 0.36394510  | -5.18624945 | 3.04823047  |
| C    | 3.39072202 | 1.42071355  | 0.09450780  | H    | 1.07858380  | -4.42400675 | 4.48237144  |
| H    | 3.73429894 | 2.46352281  | 0.04092187  | C    | -2.31597670 | -4.49576797 | 3.61246511  |
| H    | 4.27716454 | 0.79829829  | 0.26498446  | H    | -2.58375121 | -5.36015188 | 4.22993967  |
| H    | 2.97299653 | 1.14896666  | -0.88117122 | H    | -3.14489625 | -3.78128226 | 3.63475846  |
| C    | 2.27091285 | -1.28937041 | 1.23437634  | H    | -2.20099347 | -4.84604013 | 2.57927930  |
| H    | 1.48397029 | -2.02952986 | 1.47009048  | H    | -0.66005372 | -2.80813971 | 2.19480268  |
| C    | 3.36040807 | -1.51531860 | 2.31138021  | O    | -0.33541037 | 1.49125642  | 3.82645403  |
| H    | 3.65319752 | -2.57423009 | 2.35167651  | C    | -0.62688691 | 2.84366128  | 3.41273909  |
| H    | 4.27012340 | -0.94039597 | 2.10150207  | C    | -0.86135589 | 3.62723479  | 4.70660174  |
| H    | 2.99718707 | -1.22243226 | 3.30324749  | C    | 0.06107387  | 2.89418422  | 5.69373310  |
| C    | 2.82471257 | -1.76345491 | -0.13862484 | C    | -0.08834977 | 1.43774520  | 5.24788298  |
| H    | 2.05785447 | -1.66333990 | -0.91502784 | H    | -0.94262137 | 0.94778935  | 5.73209656  |

|   |             |             |             |   |              |             |             |
|---|-------------|-------------|-------------|---|--------------|-------------|-------------|
| H | 0.80528341  | 0.83050349  | 5.41650859  | C | -6.92900156  | -1.02557384 | -2.48737189 |
| H | -0.21834911 | 3.04129116  | 6.74143977  | H | -6.24932743  | -0.73731360 | -3.28670645 |
| H | 1.09729596  | 3.22781913  | 5.56567644  | H | -8.57861275  | -1.36820682 | -3.82893912 |
| H | -1.90727562 | 3.53986566  | 5.02403162  | H | -10.15544433 | -2.00446067 | -2.01252602 |
| H | -0.62539163 | 4.69025580  | 4.59942351  | H | -9.37614407  | -1.99682545 | 0.35072933  |
| H | 0.23353732  | 3.23057858  | 2.85285477  | H | -7.04655837  | -1.36528149 | 0.88884777  |
| H | -1.49553108 | 2.81215371  | 2.74897644  | C | -3.46669113  | -1.00969924 | 2.22865304  |
| O | -1.49413065 | -0.10529611 | 1.22926342  | H | -4.29971916  | -1.68956843 | 2.08443679  |
| C | -2.56261767 | -0.83524320 | 1.22216138  | C | -3.41820374  | -0.25774533 | 3.52885358  |
| N | -2.83396784 | -1.54392590 | -0.03698696 | H | -2.56144696  | 0.41999061  | 3.55790587  |
| C | -4.18260580 | -1.91565655 | -0.48787226 | H | -4.32942022  | 0.34025946  | 3.68642999  |
| C | -3.83832772 | -2.78823865 | -1.70374059 | H | -3.33476859  | -0.92666205 | 4.39902087  |
| H | -3.78252280 | -3.85196431 | -1.44531763 | O | -0.24439353  | 1.55196256  | -1.30783467 |
| H | -4.52312748 | -2.65670726 | -2.54312344 | C | 0.32688502   | 1.39046932  | -2.63006202 |
| O | -2.53036356 | -2.34702300 | -2.10464184 | C | -0.67581749  | 2.01597807  | -3.61004422 |
| C | -1.92623634 | -1.73854024 | -1.04046964 | C | -2.00276597  | 1.90926111  | -2.84108793 |
| O | -0.73758606 | -1.45109482 | -1.09668494 | C | -1.54498015  | 2.16373276  | -1.40524485 |
| H | -4.69076284 | -2.51458835 | 0.27103631  | H | -2.17551845  | 1.71172995  | -0.63603028 |
| C | -5.04173408 | -0.67291325 | -0.82274483 | H | -1.45491783  | 3.24131809  | -1.20419071 |
| H | -5.00476241 | -0.01267116 | 0.05048447  | H | -2.41704421  | 0.89841227  | -2.93644637 |
| H | -4.57053066 | -0.13981307 | -1.65796689 | H | -2.75842554  | 2.62602759  | -3.17759950 |
| C | -6.47359362 | -1.02237513 | -1.16206725 | H | -0.69076696  | 1.49716229  | -4.57310168 |
| C | -7.37653467 | -1.37740222 | -0.14803695 | H | -0.43042611  | 3.06814287  | -3.79690966 |
| C | -8.69140931 | -1.72992572 | -0.45009123 | H | 1.30712098   | 1.87623719  | -2.64695952 |
| C | -9.13021782 | -1.73265310 | -1.77637317 | H | 0.45704137   | 0.31771748  | -2.80855850 |
| C | -8.24533480 | -1.37703515 | -2.79445630 |   |              |             |             |

**Table 70.** Geometric coordinates and thermally corrected MP2 energies for IRC derived products leading to *(R,S)*-6 from LDA 5 mixed dimer with three THF

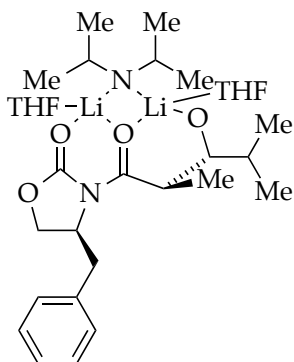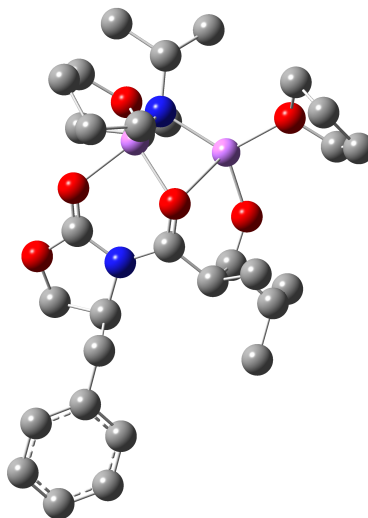

G = -1787.924983 Hartree

G<sub>MP2</sub> = -1118238.639 kcal/mol

ΔG<sub>MP2</sub> = -1.138351555 kcal/mol vs. 5 LDA mixed dimer with three THF and isobutyraldehyde

ΔG<sub>MP2</sub> = -5.359410847 kcal/mol vs. 5 LDA mixed dimer transition state leading to *(R,S)*-6

| Atom | X          | Y           | Z           | Atom | X           | Y           | Z          |
|------|------------|-------------|-------------|------|-------------|-------------|------------|
| Li   | 0.00000000 | 0.00000000  | 0.00000000  | O    | -1.02530182 | -1.23330931 | 3.67153475 |
| Li   | 0.00000000 | 0.00000000  | 2.83891880  | C    | -1.73535047 | -2.34035209 | 3.44572014 |
| N    | 1.41728246 | 0.00000000  | 1.37485377  | C    | -2.42039984 | -2.90413837 | 4.73368760 |
| C    | 2.23851959 | 1.21610089  | 1.27153323  | H    | -3.05399703 | -2.10195356 | 5.13720207 |
| H    | 1.52090665 | 1.99305647  | 0.95054564  | C    | -1.32690682 | -3.20217421 | 5.77041420 |
| C    | 2.84714054 | 1.77101888  | 2.58863609  | H    | -1.76320608 | -3.50339342 | 6.73122113 |
| H    | 3.70671867 | 1.18472439  | 2.92871580  | H    | -0.67883879 | -4.02085159 | 5.42742585 |
| H    | 3.19693034 | 2.80406048  | 2.44519740  | H    | -0.70048148 | -2.32067922 | 5.92271066 |
| H    | 2.10213953 | 1.77314417  | 3.39100496  | C    | -3.28617821 | -4.15154084 | 4.50272952 |
| C    | 3.34661724 | 1.22915325  | 0.18834098  | H    | -3.61179915 | -4.58299605 | 5.45706595 |
| H    | 3.70562208 | 2.25360127  | 0.01450094  | H    | -4.19222564 | -3.93966838 | 3.92149059 |
| H    | 4.21658821 | 0.63166027  | 0.48408486  | H    | -2.71802508 | -4.93288827 | 3.97668854 |
| H    | 2.97608768 | 0.82940925  | -0.76285406 | H    | -1.12971961 | -3.19309231 | 3.03817265 |
| C    | 2.06021368 | -1.30680547 | 1.60463174  | O    | -0.45685344 | 1.72488306  | 3.79673684 |
| H    | 1.20983406 | -1.99141022 | 1.77684219  | C    | -0.62858775 | 3.04316067  | 3.26951241 |
| C    | 2.93639021 | -1.44944251 | 2.87397581  | C    | -2.13279285 | 3.30350662  | 3.39417794 |
| H    | 3.15408408 | -2.50763567 | 3.07519630  | C    | -2.50581663 | 2.56147777  | 4.70301482 |
| H    | 3.89912309 | -0.93686205 | 2.76628119  | C    | -1.30424484 | 1.61820586  | 4.95998600 |
| H    | 2.42883915 | -1.03852611 | 3.75430523  | H    | -1.55967804 | 0.56060208  | 5.03959648 |
| C    | 2.83148355 | -1.93286681 | 0.40967211  | H    | -0.73275486 | 1.93434738  | 5.84356900 |
| H    | 2.25680328 | -1.84117500 | -0.51826085 | H    | -3.44038370 | 2.00404777  | 4.59217788 |
| H    | 3.80682205 | -1.46207179 | 0.24863117  | H    | -2.63700584 | 3.26021136  | 5.53556981 |
| H    | 3.01795843 | -3.00180025 | 0.59100817  | H    | -2.65554718 | 2.86051468  | 2.54000401 |

|   |             |             |             |
|---|-------------|-------------|-------------|
| H | -2.37395222 | 4.37079261  | 3.42344330  |
| H | -0.04657357 | 3.76218756  | 3.86680159  |
| H | -0.24650776 | 3.04389176  | 2.24633307  |
| O | -1.73906531 | -0.56983725 | 0.81807986  |
| C | -2.08860556 | -1.72542837 | 1.06388694  |
| N | -1.62164282 | -2.78474740 | 0.24665164  |
| C | -2.08174779 | -4.18888078 | 0.28503860  |
| C | -0.94647891 | -4.85465592 | -0.50332561 |
| H | -0.12553593 | -5.17971526 | 0.14320253  |
| H | -1.27842527 | -5.68364534 | -1.12834787 |
| O | -0.45307824 | -3.80720819 | -1.36716127 |
| C | -0.74147202 | -2.60649305 | -0.82299866 |
| O | -0.27432398 | -1.57222290 | -1.25668231 |
| H | -2.10186987 | -4.55148703 | 1.31342364  |
| C | -3.46639651 | -4.35830633 | -0.38485079 |
| H | -4.17512459 | -3.68617874 | 0.11261096  |
| H | -3.38914774 | -4.02177605 | -1.42599983 |
| C | -3.97109647 | -5.78539780 | -0.33292288 |
| C | -4.40688168 | -6.34495653 | 0.87778869  |
| C | -4.85114267 | -7.66554948 | 0.93439824  |
| C | -4.86969917 | -8.45023570 | -0.22113146 |
| C | -4.44347041 | -7.90461372 | -1.43205531 |
| C | -3.99740856 | -6.58226259 | -1.48503122 |
| H | -3.67667356 | -6.16016425 | -2.43519646 |
| H | -4.46022730 | -8.50475697 | -2.33780234 |
| H | -5.21827260 | -9.47834606 | -0.17727046 |
| H | -5.18730055 | -8.08073086 | 1.88065958  |
| H | -4.40547526 | -5.74107776 | 1.78293224  |
| C | -2.87126827 | -2.08157041 | 2.27693334  |
| H | -3.41864784 | -3.01337696 | 2.12585455  |
| C | -3.82678250 | -0.95758842 | 2.68132921  |
| H | -3.24953894 | -0.10170634 | 3.03609587  |
| H | -4.45789789 | -0.63375112 | 1.84574748  |
| H | -4.48353424 | -1.29444935 | 3.48934356  |
| O | -0.41710859 | 1.55081712  | -1.18610118 |
| C | 0.38024004  | 1.66329614  | -2.39428357 |
| C | -0.57356818 | 2.15665056  | -3.49056912 |
| C | -1.94210370 | 1.67412706  | -2.98336175 |
| C | -1.79587215 | 1.86790514  | -1.47584739 |
| H | -2.41849350 | 1.20585703  | -0.87045762 |
| H | -1.99256636 | 2.90983479  | -1.18602530 |
| H | -2.08447926 | 0.61227186  | -3.21501361 |
| H | -2.78239216 | 2.23630725  | -3.40218026 |
| H | -0.31171909 | 1.75806326  | -4.47501306 |
| H | -0.55675141 | 3.25101921  | -3.55378783 |
| H | 1.21044158  | 2.34783408  | -2.19889522 |
| H | 0.78504921  | 0.67104017  | -2.62213019 |

**Table 71.** Geometric coordinates and thermally corrected MP2 energies for IRC derived reactants leading to (*S,R*)-6 from LDA 5 mixed dimer with three THF

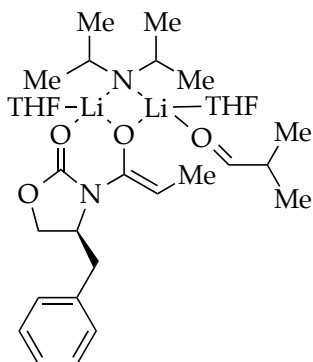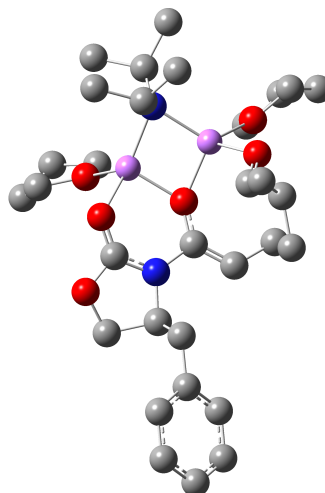

$G = -1787.931664$  Hartree

$G_{\text{MP2}} = -1118235.818$  kcal/mol

$\Delta G_{\text{MP2}} = 1.682961577$  kcal/mol vs. 5 LDA mixed dimer with three THF and isobutyraldehyde

$\Delta G_{\text{MP2}} = -6.022391042$  kcal/mol vs. 5 LDA mixed dimer transition state leading to (*S,R*)-6

| Atom | X           | Y           | Z          | Atom | X           | Y           | Z           |
|------|-------------|-------------|------------|------|-------------|-------------|-------------|
| Li   | 0.00000000  | 0.00000000  | 0.00000000 | H    | -5.85026579 | -1.03413732 | 2.39118575  |
| O    | 0.00000000  | 0.00000000  | 1.93586870 | H    | -3.71257359 | -1.39711350 | 1.38114791  |
| C    | 0.84537702  | 0.00000000  | 2.91454756 | H    | -2.96551763 | -1.88581937 | 2.92236317  |
| N    | 0.54357933  | 0.94978369  | 3.99139468 | N    | -1.60182376 | 1.15907247  | -0.36078309 |
| C    | 1.28722295  | 1.04040249  | 5.25469787 | C    | -1.24661369 | 2.55248969  | -0.65581564 |
| C    | 0.24190260  | 1.73369839  | 6.13488751 | H    | -0.51467585 | 2.81118811  | 0.13178045  |
| H    | -0.40291886 | 1.01636062  | 6.65606511 | C    | -0.48953996 | 2.82094361  | -1.98751550 |
| H    | 0.66949249  | 2.43095784  | 6.85704323 | H    | -1.15061459 | 2.79024706  | -2.85995022 |
| O    | -0.55842480 | 2.47850130  | 5.19943700 | H    | -0.02461448 | 3.81807773  | -1.97163009 |
| C    | -0.44272501 | 1.89855108  | 3.96568657 | H    | 0.30082810  | 2.07750992  | -2.14062469 |
| O    | -1.16488740 | 2.27162926  | 3.05086281 | C    | -2.36403517 | 3.61649533  | -0.51110538 |
| Li   | -1.62676756 | 0.98356236  | 1.65279854 | H    | -1.93788740 | 4.62958896  | -0.50998153 |
| O    | -3.20467027 | 0.14861662  | 2.66344289 | H    | -3.08347131 | 3.57082046  | -1.33732456 |
| C    | -3.68166179 | -1.19777714 | 2.45714968 | H    | -2.91371447 | 3.47960633  | 0.42709493  |
| C    | -5.06511631 | -1.26754455 | 3.11951468 | C    | -2.67503364 | 0.49568530  | -1.10394542 |
| C    | -4.98164437 | -0.15934611 | 4.18139755 | H    | -2.59940243 | -0.56459060 | -0.79622992 |
| C    | -4.14553663 | 0.89704794  | 3.45987315 | C    | -2.56202150 | 0.46328657  | -2.64913708 |
| H    | -3.57349389 | 1.55391203  | 4.11814989 | H    | -3.26334749 | -0.26873537 | -3.07488849 |
| H    | -4.76777445 | 1.51646301  | 2.79873864 | H    | -2.80092963 | 1.43420143  | -3.09860228 |
| H    | -4.45504577 | -0.51869589 | 5.07376371 | H    | -1.54780783 | 0.18985557  | -2.96164713 |
| H    | -5.96115686 | 0.21778716  | 4.49090004 | C    | -4.13066856 | 0.89905288  | -0.73498747 |
| H    | -5.27690683 | -2.25603853 | 3.53834215 | H    | -4.25338902 | 0.92235531  | 0.35321217  |



|   |             |             |             |   |             |             |             |
|---|-------------|-------------|-------------|---|-------------|-------------|-------------|
| H | -4.40022776 | 1.88657061  | -1.12310935 | C | -0.50710910 | -4.07191956 | -1.43151300 |
| H | -4.85264158 | 0.17864714  | -1.14837714 | C | 0.76637129  | -3.64530574 | -2.18020925 |
| H | 1.51388087  | 0.03701079  | 5.62253250  | C | 0.67338153  | -2.12267251 | -2.10095973 |
| C | 2.59169140  | 1.86550993  | 5.10813697  | H | 0.01404910  | -1.71961491 | -2.88186088 |
| H | 3.16517272  | 1.43839240  | 4.27930038  | H | 1.63485076  | -1.60656746 | -2.14809908 |
| H | 2.31669075  | 2.88719706  | 4.81792730  | H | 0.80549497  | -4.01303325 | -3.21007285 |
| C | 3.42147273  | 1.88884771  | 6.37337341  | H | 1.66062462  | -3.99931908 | -1.65383304 |
| C | 4.13224679  | 0.74950603  | 6.78156798  | H | -1.37411922 | -4.01919411 | -2.10014325 |
| C | 4.87732443  | 0.75313440  | 7.96027823  | H | -0.45347056 | -5.08796640 | -1.02912916 |
| C | 4.92797609  | 1.90088205  | 8.75497978  | H | -0.13830757 | -3.33566180 | 0.60732800  |
| C | 4.23045887  | 3.04246198  | 8.35967202  | H | -1.64854888 | -2.72310401 | -0.10768814 |
| C | 3.48411736  | 3.03370804  | 7.17926634  | O | 1.89806551  | 0.61183581  | -0.48442398 |
| H | 2.95099787  | 3.93139707  | 6.87324913  | C | 2.45444912  | 1.43922210  | 0.22045909  |
| H | 4.26832503  | 3.94304923  | 8.96697873  | H | 1.91461215  | 1.87651984  | 1.08149480  |
| H | 5.51063327  | 1.90559475  | 9.67218116  | C | 3.85264015  | 1.95109645  | -0.01973004 |
| H | 5.42324229  | -0.13893743 | 8.25621206  | C | 3.77083402  | 3.43736704  | -0.42603758 |
| H | 4.10831443  | -0.14663048 | 6.16467324  | H | 3.30553414  | 4.03883806  | 0.36423395  |
| C | 1.95334966  | -0.78239242 | 3.05745003  | H | 4.77785589  | 3.83282559  | -0.59867171 |
| H | 2.57321545  | -0.68865314 | 3.94126106  | H | 3.18761624  | 3.57107063  | -1.34291069 |
| C | 2.32074115  | -1.87421823 | 2.09202225  | C | 4.71262201  | 1.75946294  | 1.24262425  |
| H | 1.70409708  | -1.83115626 | 1.19074808  | H | 4.29611517  | 2.31468591  | 2.09155529  |
| H | 3.37317183  | -1.80980350 | 1.77625541  | H | 4.77786955  | 0.70454754  | 1.52814992  |
| H | 2.19541531  | -2.87658480 | 2.53374119  | H | 5.72754609  | 2.13204140  | 1.06528272  |
| O | 0.09887665  | -1.85320275 | -0.80692774 | H | 4.27176101  | 1.36882509  | -0.84861906 |
| C | -0.61525214 | -3.01233175 | -0.32474159 |   |             |             |             |

**Table 72.** Geometric coordinates and thermally corrected MP2 energies for IRC derived products leading to (*S,R*)-6 from LDA 5 mixed dimer with three THF

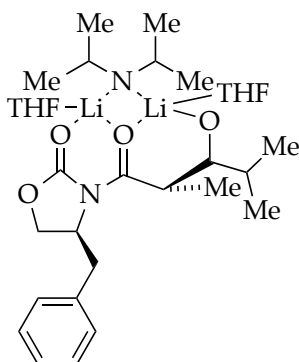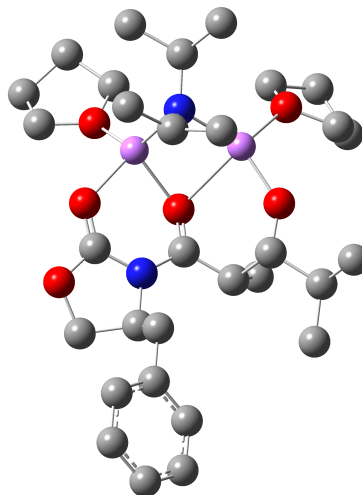

G = -1787.922574 Hartree

G<sub>MP2</sub> = -1118236.553 kcal/mol

ΔG<sub>MP2</sub> = 0.947782527 kcal/mol vs. 5 LDA mixed dimer with three THF and isobutyraldehyde

ΔG<sub>MP2</sub> = -6.757570092 kcal/mol vs. 5 LDA mixed dimer transition state leading to (*S,R*)-6

| Atom | X           | Y          | Z          | Atom | X           | Y           | Z           |
|------|-------------|------------|------------|------|-------------|-------------|-------------|
| Li   | 0.00000000  | 0.00000000 | 0.00000000 | H    | -5.58726042 | 2.12987640  | 2.02214671  |
| O    | 0.00000000  | 0.00000000 | 2.51962820 | H    | -3.91829782 | 0.59026310  | 1.20218014  |
| C    | 1.15788039  | 0.00000000 | 2.93904615 | H    | -4.02427724 | -0.42202553 | 2.66732682  |
| N    | 1.59527635  | 1.08428602 | 3.74776786 | N    | -0.79952483 | 1.86576753  | 0.12913657  |
| C    | 2.87787254  | 1.21071710 | 4.47503610 | C    | 0.32678429  | 2.81388557  | 0.04266924  |
| C    | 2.43021001  | 2.10910867 | 5.63640718 | H    | 0.91497189  | 2.62223332  | 0.95978369  |
| H    | 2.07442920  | 1.53491640 | 6.49866311 | C    | 1.34019365  | 2.56887769  | -1.10843027 |
| H    | 3.19394349  | 2.81827127 | 5.95495337 | H    | 0.92089189  | 2.80964566  | -2.09046858 |
| O    | 1.31828227  | 2.85486026 | 5.09789265 | H    | 2.23553024  | 3.19376858  | -0.97298195 |
| C    | 0.77583936  | 2.17074644 | 4.06737693 | H    | 1.66336706  | 1.52146824  | -1.11766175 |
| O    | -0.26272717 | 2.52103171 | 3.54576235 | C    | -0.01002234 | 4.32303936  | 0.10281615  |
| Li   | -1.16634854 | 1.56510553 | 2.04800030 | H    | 0.90432618  | 4.91555728  | 0.24623500  |
| O    | -2.98163936 | 1.35855462 | 2.87335481 | H    | -0.47834652 | 4.67771803  | -0.82294612 |
| C    | -4.06550151 | 0.60693546 | 2.28529925 | H    | -0.69042211 | 4.54259541  | 0.93372604  |
| C    | -5.34831917 | 1.31915458 | 2.71971301 | C    | -1.95400494 | 2.02258685  | -0.76367165 |
| C    | -4.94695839 | 1.89104492 | 4.08840761 | H    | -2.51791477 | 1.07911135  | -0.64681903 |
| C    | -3.49141101 | 2.29726149 | 3.84936323 | C    | -1.67336229 | 2.12376250  | -2.28264151 |
| H    | -2.86073999 | 2.23906090 | 4.73961034 | H    | -2.60735024 | 2.03317524  | -2.85514614 |
| H    | -3.41570275 | 3.30996117 | 3.43371998 | H    | -1.22239567 | 3.08573266  | -2.55251204 |
| H    | -5.00770846 | 1.11481702 | 4.86057962 | H    | -0.99526449 | 1.32789153  | -2.60974525 |
| H    | -5.56781032 | 2.73455013 | 4.40466641 | C    | -2.97622854 | 3.12980737  | -0.37884381 |
| H    | -6.20716888 | 0.64282542 | 2.76529359 | H    | -3.20584944 | 3.08145248  | 0.69247900  |

|   |             |             |             |
|---|-------------|-------------|-------------|
| H | -2.60410447 | 4.13656650  | -0.59263008 |
| H | -3.91661931 | 3.00433805  | -0.93640606 |
| H | 3.19848362  | 0.23529711  | 4.84456331  |
| C | 3.98788425  | 1.85043038  | 3.61020902  |
| H | 4.11697792  | 1.24033587  | 2.71017388  |
| H | 3.63938397  | 2.83449287  | 3.27413919  |
| C | 5.29878591  | 1.98408266  | 4.35759122  |
| C | 6.08595079  | 0.85359883  | 4.62535757  |
| C | 7.28244750  | 0.96681628  | 5.33292229  |
| C | 7.71511368  | 2.21557486  | 5.78480843  |
| C | 6.94567183  | 3.34868562  | 5.51989940  |
| C | 5.74741505  | 3.23157660  | 4.81218063  |
| H | 5.16051980  | 4.12208644  | 4.59685869  |
| H | 7.27847271  | 4.32623457  | 5.85839290  |
| H | 8.64904778  | 2.30466865  | 6.33289152  |
| H | 7.88108942  | 0.08036492  | 5.52488297  |
| H | 5.76798091  | -0.12136616 | 4.26263026  |
| C | 2.12849102  | -1.07406020 | 2.58740226  |
| H | 2.99772899  | -1.03739930 | 3.24658766  |
| C | 1.45960063  | -2.45287897 | 2.65976369  |
| H | 0.74967041  | -2.55009966 | 1.83572323  |
| H | 2.21259871  | -3.24133688 | 2.56571463  |
| H | 0.92699025  | -2.60546700 | 3.60559489  |
| O | -1.11740759 | -1.45519819 | -0.90874038 |
| C | -2.42517615 | -1.92225950 | -0.52397948 |
| C | -2.48168792 | -3.41087902 | -0.89860647 |
| C | -0.99823104 | -3.81174711 | -0.87777270 |
| C | -0.32664832 | -2.55498211 | -1.42535058 |
| H | -0.36231432 | -2.53140969 | -2.52395185 |
| H | 0.69374252  | -2.38620398 | -1.07562854 |
| H | -0.78322209 | -4.70165179 | -1.47765780 |
| H | -0.66469709 | -4.00185768 | 0.14956820  |
| H | -2.89396145 | -3.53727479 | -1.90666067 |
| H | -3.10154288 | -3.99030040 | -0.20716456 |
| H | -2.53910040 | -1.77352490 | 0.55773766  |
| H | -3.18328717 | -1.32226445 | -1.03895221 |
| O | 1.61812915  | -0.79957649 | 0.18921186  |
| C | 2.63754622  | -0.76873175 | 1.05137425  |
| H | 3.12942912  | 0.23519461  | 1.12572977  |
| C | 3.78096179  | -1.76662678 | 0.66534663  |
| C | 4.29619176  | -1.39248150 | -0.73255027 |
| H | 4.79537577  | -0.41367188 | -0.71368338 |
| H | 5.02304240  | -2.12938255 | -1.09753105 |
| H | 3.46496118  | -1.33080291 | -1.43813608 |
| C | 4.95198873  | -1.83445314 | 1.65641055  |
| H | 5.38109315  | -0.83790322 | 1.83163096  |
| H | 4.66639157  | -2.25749464 | 2.62746443  |
| H | 5.75966005  | -2.46201180 | 1.25968359  |
| H | 3.31965409  | -2.76153905 | 0.59498607  |

**Table 73.** Geometric coordinates and thermally corrected MP2 energies for IRC derived reactants leading to (*R,R*)-6 from LDA 5 mixed dimer with three THF

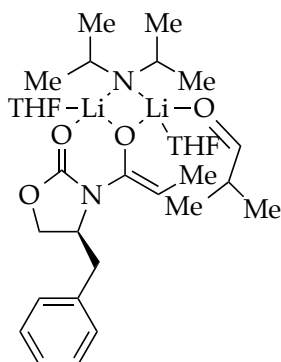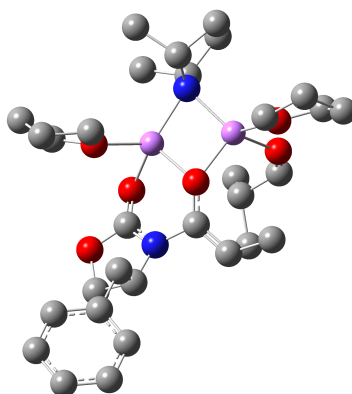

G = -1787.93281 Hartree

G<sub>MP2</sub> = -1118239.503 kcal/mol

ΔG<sub>MP2</sub> = -2.001858613 kcal/mol vs. 5 LDA mixed dimer with three THF and isobutyraldehyde

ΔG<sub>MP2</sub> = -6.53130097 kcal/mol vs. 5 LDA mixed dimer transition state leading to (*R,R*)-6

| Atom | X           | Y           | Z          | Atom | X           | Y           | Z           |
|------|-------------|-------------|------------|------|-------------|-------------|-------------|
| Li   | 0.00000000  | 0.00000000  | 0.00000000 | H    | -3.07400803 | -2.78670353 | 4.25601622  |
| O    | 0.00000000  | 0.00000000  | 1.93989790 | N    | -1.60815550 | -1.19089269 | -0.35234877 |
| C    | 0.86219514  | 0.00000000  | 2.90700148 | C    | -2.81958464 | -0.43944817 | -0.69214531 |
| N    | 0.60140705  | -0.97601693 | 3.97793963 | H    | -2.88793277 | 0.33336914  | 0.09770654  |
| C    | 0.65652203  | -0.64570120 | 5.40569771 | C    | -2.78860321 | 0.37546935  | -2.01681301 |
| C    | 0.42666091  | -2.03849253 | 6.01628996 | H    | -2.90012654 | -0.25873204 | -2.90180022 |
| H    | 1.36977240  | -2.54589600 | 6.24858572 | H    | -3.60624680 | 1.11172745  | -2.03998476 |
| H    | -0.20546258 | -2.02732525 | 6.90587075 | H    | -1.83887256 | 0.91290257  | -2.10578500 |
| O    | -0.24819432 | -2.78278851 | 4.98435429 | C    | -4.17113727 | -1.19513293 | -0.62450244 |
| C    | -0.02298484 | -2.16855203 | 3.78388739 | H    | -5.01528285 | -0.49316093 | -0.68877101 |
| O    | -0.37517197 | -2.69799450 | 2.73425005 | H    | -4.28215260 | -1.90651889 | -1.45086886 |
| Li   | -1.36044558 | -1.33341289 | 1.63387516 | H    | -4.26036795 | -1.75462343 | 0.31363704  |
| O    | -2.91879316 | -1.17940228 | 2.96682295 | C    | -1.30317917 | -2.44509638 | -1.05076927 |
| C    | -3.63185811 | -2.35966802 | 3.41616332 | H    | -0.25439019 | -2.65734763 | -0.77996116 |
| C    | -5.03187525 | -1.88005304 | 3.82438777 | C    | -1.31393222 | -2.42323290 | -2.59836559 |
| C    | -4.79766885 | -0.39674360 | 4.15523549 | H    | -0.85785076 | -3.33847424 | -3.00171930 |
| C    | -3.75062893 | -0.01263102 | 3.11110434 | H    | -2.33146981 | -2.36914510 | -3.00339950 |
| H    | -3.10559621 | 0.81968344  | 3.40563767 | H    | -0.75089693 | -1.56462923 | -2.98142076 |
| H    | -4.21765701 | 0.22540552  | 2.14639244 | C    | -2.07751467 | -3.70294118 | -0.56588872 |
| H    | -4.38771761 | -0.28619215 | 5.16669924 | H    | -2.03541244 | -3.77914772 | 0.52729892  |
| H    | -5.70500216 | 0.21108451  | 4.08670186 | H    | -3.13084771 | -3.68874610 | -0.86556088 |
| H    | -5.43789483 | -2.45256910 | 4.66376107 | H    | -1.63229310 | -4.61981104 | -0.97976945 |
| H    | -5.72963456 | -1.97271496 | 2.98423476 | H    | 1.64523659  | -0.26877897 | 5.67865417  |
| H    | -3.64702996 | -3.08989019 | 2.60167995 | C    | -0.41167098 | 0.40702382  | 5.78480351  |

|   |             |             |             |   |             |             |             |
|---|-------------|-------------|-------------|---|-------------|-------------|-------------|
| H | -0.26253145 | 1.26299689  | 5.11665923  | C | 2.63785637  | -3.95493910 | -0.20601651 |
| H | -1.40158259 | -0.01044701 | 5.56370876  | H | 3.58437056  | -4.05576023 | -0.75267321 |
| C | -0.32498777 | 0.84267237  | 7.23024861  | H | 2.59789319  | -4.75070622 | 0.54516796  |
| C | 0.69283335  | 1.71291349  | 7.65016112  | H | 1.81419953  | -4.11487211 | -0.90946941 |
| C | 0.80134351  | 2.09708674  | 8.98625747  | C | 3.66377208  | -2.37747671 | 1.51398158  |
| C | -0.10992551 | 1.61801318  | 9.93058751  | H | 3.53150920  | -1.43625440 | 2.05745824  |
| C | -1.12997176 | 0.75615228  | 9.52699472  | H | 3.65230547  | -3.19847435 | 2.23941510  |
| C | -1.23393452 | 0.37306948  | 8.18797364  | H | 4.64938067  | -2.37409708 | 1.03040879  |
| H | -2.03929643 | -0.29044903 | 7.87916792  | H | 3.55070897  | -1.51892628 | -1.16714724 |
| H | -1.84856552 | 0.38352703  | 10.25238055 | O | 0.11285002  | 1.91721269  | -0.67574672 |
| H | -0.02773567 | 1.91914838  | 10.97143467 | C | -0.73610078 | 2.96952350  | -0.16426552 |
| H | 1.59424832  | 2.77561506  | 9.29015437  | C | -0.61118739 | 4.13082971  | -1.15764318 |
| H | 1.39925121  | 2.09936730  | 6.91823982  | C | 0.79163092  | 3.90942394  | -1.74551437 |
| C | 1.95278130  | 0.79254813  | 3.08563608  | C | 0.86057292  | 2.38405491  | -1.81691728 |
| H | 2.59033970  | 0.61403423  | 3.94714055  | H | 1.87013614  | 1.97420298  | -1.74409650 |
| C | 2.33714510  | 1.91229567  | 2.16120506  | H | 0.39058129  | 2.00284262  | -2.73399166 |
| H | 1.66855218  | 1.95080788  | 1.29711204  | H | 1.55931024  | 4.29398451  | -1.06367971 |
| H | 2.30313097  | 2.89419142  | 2.66004232  | H | 0.93248899  | 4.38245775  | -2.72220099 |
| H | 3.36357377  | 1.79728983  | 1.78117903  | H | -0.73110914 | 5.10560801  | -0.67526541 |
| O | 1.80354487  | -0.61958433 | -0.76116799 | H | -1.36945063 | 4.04556369  | -1.94460323 |
| C | 2.62510569  | -1.49622870 | -0.55100645 | H | -1.75418116 | 2.57944979  | -0.07718965 |
| C | 2.53030566  | -2.58237829 | 0.48669642  | H | -0.37523615 | 3.24145398  | 0.83460569  |
| H | 1.56333808  | -2.49457179 | 0.99154989  |   |             |             |             |

**Table 74.** Geometric coordinates and thermally corrected MP2 energies for IRC derived products leading to (*R,R*)-6 from LDA 5 mixed dimer with three THF

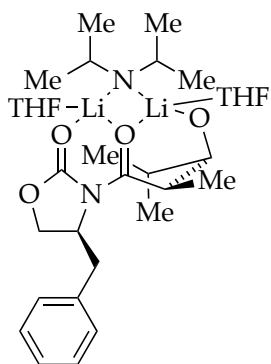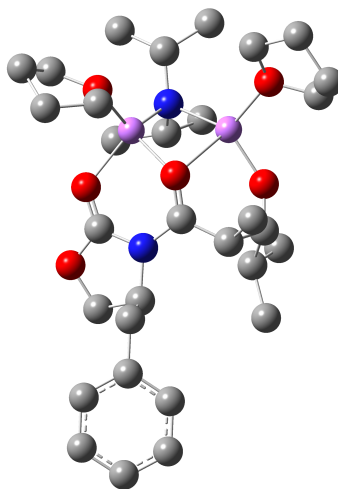

G = -1787.923007 Hartree

G<sub>MP2</sub> = -1118237.143 kcal/mol

ΔG<sub>MP2</sub> = 0.358166598 kcal/mol vs. 5 LDA mixed dimer with three THF and isobutyraldehyde

ΔG<sub>MP2</sub> = -4.171275759 kcal/mol vs. 5 LDA mixed dimer transition state leading to (*R,R*)-6

| Atom | X           | Y           | Z          | Atom | X           | Y           | Z           |
|------|-------------|-------------|------------|------|-------------|-------------|-------------|
| Li   | 0.00000000  | 0.00000000  | 0.00000000 | H    | -5.58051682 | -1.54485469 | 4.02487542  |
| O    | 0.00000000  | 0.00000000  | 2.47464250 | H    | -4.40001188 | -2.59706676 | 2.20357967  |
| C    | 1.15079854  | 0.00000000  | 2.91988682 | H    | -3.11766922 | -3.19930217 | 3.28321254  |
| N    | 1.60660256  | -1.12499448 | 3.65438118 | N    | -0.91225560 | -1.83355722 | 0.05465841  |
| C    | 2.82008343  | -1.18313433 | 4.49520342 | C    | -2.18478787 | -1.93453700 | -0.67432899 |
| C    | 2.90570596  | -2.69679863 | 4.72558204 | H    | -2.86497444 | -1.26281697 | -0.12006664 |
| H    | 3.50314501  | -3.20065996 | 3.95929424 | C    | -2.20324770 | -1.38590905 | -2.12821162 |
| H    | 3.27090060  | -2.96617053 | 5.71668189 | H    | -1.68894919 | -2.04831831 | -2.83165671 |
| O    | 1.54102293  | -3.15248687 | 4.60692041 | H    | -3.23823801 | -1.27520454 | -2.48519684 |
| C    | 0.83762297  | -2.27284283 | 3.86228765 | H    | -1.72051948 | -0.40404556 | -2.17311050 |
| O    | -0.28882410 | -2.51553060 | 3.47792588 | C    | -2.89191472 | -3.31263802 | -0.66943052 |
| Li   | -1.19213049 | -1.52085864 | 1.97492852 | H    | -3.92780870 | -3.21908146 | -1.02576851 |
| O    | -2.99154764 | -1.19245815 | 2.78577924 | H    | -2.39043051 | -4.03223730 | -1.32690989 |
| C    | -3.79650375 | -2.36181589 | 3.08423710 | H    | -2.91390300 | -3.74253484 | 0.33889565  |
| C    | -4.62681735 | -1.99777821 | 4.32028188 | C    | 0.18519954  | -2.76844638 | -0.24644519 |
| C    | -3.73596387 | -0.95777062 | 5.01806319 | H    | 1.05233570  | -2.34187052 | 0.28919208  |
| C    | -3.14920017 | -0.20390046 | 3.82541791 | C    | 0.64577356  | -2.86706209 | -1.72105131 |
| H    | -2.16947444 | 0.24259902  | 4.01128079 | H    | 1.60356149  | -3.40116448 | -1.79137779 |
| H    | -3.83367213 | 0.57939152  | 3.47090314 | H    | -0.07391415 | -3.41504329 | -2.34082963 |
| H    | -2.93868431 | -1.45497507 | 5.58275469 | H    | 0.78149129  | -1.87140078 | -2.15864112 |
| H    | -4.28586267 | -0.30296848 | 5.70095805 | C    | 0.05008360  | -4.20862929 | 0.32275828  |
| H    | -4.84497817 | -2.86979241 | 4.94367774 | H    | -0.26379834 | -4.18227342 | 1.37244485  |

|   |             |             |             |
|---|-------------|-------------|-------------|
| H | -0.67653269 | -4.81313310 | -0.22994119 |
| H | 1.01461489  | -4.73517772 | 0.27111054  |
| H | 3.68720201  | -0.83349763 | 3.93682113  |
| C | 2.64913310  | -0.37154463 | 5.80212971  |
| H | 2.38981825  | 0.65891198  | 5.53270311  |
| H | 1.79389004  | -0.78056737 | 6.35421558  |
| C | 3.88931893  | -0.38946273 | 6.67103200  |
| C | 5.01910394  | 0.36292085  | 6.31659654  |
| C | 6.17335136  | 0.33104569  | 7.09837968  |
| C | 6.21688250  | -0.45403609 | 8.25289508  |
| C | 5.09860115  | -1.20269725 | 8.62005844  |
| C | 3.94487547  | -1.16934976 | 7.83385368  |
| H | 3.07283466  | -1.74688709 | 8.13372115  |
| H | 5.11985053  | -1.81041418 | 9.52065345  |
| H | 7.11497209  | -0.47732088 | 8.86384889  |
| H | 7.03719894  | 0.92301645  | 6.80849229  |
| H | 4.99257219  | 0.98713815  | 5.42569062  |
| C | 2.10417831  | 1.09407731  | 2.60951126  |
| H | 2.96069608  | 1.09427917  | 3.28624623  |
| C | 1.40467615  | 2.45851598  | 2.64781834  |
| H | 0.64994183  | 2.50323025  | 1.85981110  |
| H | 0.91864723  | 2.65437581  | 3.61162166  |
| H | 2.14048256  | 3.25015930  | 2.47021987  |
| O | 1.66249264  | 0.67625247  | 0.20265743  |
| C | 2.66482537  | 0.86496780  | 1.05388370  |
| C | 3.78243907  | -0.23112781 | 1.01492996  |
| H | 3.39556497  | -1.14158767 | 1.50101272  |
| C | 4.09276292  | -0.59221951 | -0.44432725 |
| H | 4.47569350  | 0.28356231  | -0.98517409 |
| H | 4.85441544  | -1.38062600 | -0.50067445 |
| H | 3.18945872  | -0.92915505 | -0.95541843 |
| C | 5.07695156  | 0.21043405  | 1.71743872  |
| H | 4.93664036  | 0.48507234  | 2.77115614  |
| H | 5.83561330  | -0.58122277 | 1.68591729  |
| H | 5.50138576  | 1.08929350  | 1.21512142  |
| H | 3.19509110  | 1.83991455  | 0.90221973  |
| O | -1.07502024 | 1.57941016  | -0.70335328 |
| C | -2.40901281 | 1.99805027  | -0.35272115 |
| C | -2.50232994 | 3.48644189  | -0.72373722 |
| C | -1.03207296 | 3.93487003  | -0.67508026 |
| C | -0.31308212 | 2.69827372  | -1.20992229 |
| H | 0.70979109  | 2.55491513  | -0.85654888 |
| H | -0.32989317 | 2.67507866  | -2.30923632 |
| H | -0.72458072 | 4.13724619  | 0.35807267  |
| H | -0.83412774 | 4.83070250  | -1.27200821 |
| H | -3.15177933 | 4.04517545  | -0.04258268 |
| H | -2.89961581 | 3.60435557  | -1.73874434 |
| H | -3.12967519 | 1.37352106  | -0.89033532 |
| H | -2.54596124 | 1.83661548  | 0.72394141  |

**Table 75.** Geometric coordinates and thermally corrected MP2 energies for IRC derived reactants leading to (*S,S*)-**6** from LDA **5** mixed dimer with three THF

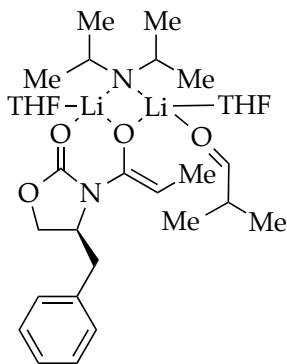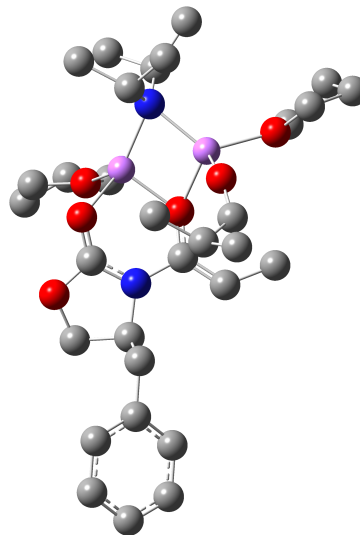

G = -1787.929557 Hartree

G<sub>MP2</sub> = -1118235.511 kcal/mol

ΔG<sub>MP2</sub> = 1.990613531 kcal/mol vs. **5** LDA mixed dimer with three THF and isobutyraldehyde

ΔG<sub>MP2</sub> = -6.484736567 kcal/mol vs. **5** LDA mixed dimer transition state leading to (*S,S*)-**6**

| Atom | X           | Y           | Z          | Atom | X           | Y           | Z           |
|------|-------------|-------------|------------|------|-------------|-------------|-------------|
| Li   | 0.00000000  | 0.00000000  | 0.00000000 | H    | -5.47382112 | 1.75328680  | 4.90729562  |
| O    | 0.00000000  | 0.00000000  | 1.94436310 | H    | -5.14110030 | -0.94002336 | 4.54281314  |
| C    | 0.92776819  | 0.00000000  | 2.84008441 | H    | -5.70360632 | 0.03817787  | 3.17778532  |
| N    | 0.83590704  | 1.07743400  | 3.83145021 | H    | -3.72684041 | -0.80600147 | 2.12707949  |
| C    | 1.51799883  | 1.08722881  | 5.13200798 | H    | -2.88089467 | -1.01563771 | 3.67826132  |
| C    | 0.57213565  | 1.99981760  | 5.92206224 | N    | -1.61338894 | 1.15293923  | -0.37167491 |
| H    | -0.22519987 | 1.43795237  | 6.42228391 | C    | -1.20857313 | 2.41311298  | -1.01162178 |
| H    | 1.08035228  | 2.63697977  | 6.64729574 | H    | -0.41543361 | 2.80414923  | -0.35225230 |
| O    | -0.01907469 | 2.84042909  | 4.91250383 | C    | -0.52312471 | 2.29187580  | -2.40144434 |
| C    | 0.04969497  | 2.19028021  | 3.71027137 | H    | -1.23080631 | 2.04881420  | -3.20142531 |
| O    | -0.53342296 | 2.64043545  | 2.73367393 | H    | -0.03466299 | 3.23824018  | -2.67649739 |
| Li   | -1.42272708 | 1.27248758  | 1.62091755 | H    | 0.24774326  | 1.51264802  | -2.38188794 |
| O    | -2.93417055 | 0.91908550  | 2.95924549 | C    | -2.25944644 | 3.54794542  | -1.08284032 |
| C    | -3.56699153 | -0.36966601 | 3.11805928 | H    | -1.78226475 | 4.49848228  | -1.35930517 |
| C    | -4.87509141 | -0.11126185 | 3.87963426 | H    | -3.03415365 | 3.34768177  | -1.83296797 |
| C    | -4.57356181 | 1.19714154  | 4.62862128 | H    | -2.75216757 | 3.68691808  | -0.11360937 |
| C    | -3.71171008 | 1.94355861  | 3.61103696 | C    | -2.80695151 | 0.44138609  | -0.83172569 |
| H    | -3.01354370 | 2.66213163  | 4.04561301 | H    | -2.76813521 | -0.52713655 | -0.29572208 |
| H    | -4.33216870 | 2.45905727  | 2.86458186 | C    | -2.87861448 | 0.06024903  | -2.33211511 |
| H    | -3.99884962 | 0.99650852  | 5.54093309 | H    | -3.68752004 | -0.66238088 | -2.51419566 |



|   |             |             |             |   |             |             |             |
|---|-------------|-------------|-------------|---|-------------|-------------|-------------|
| H | -3.07859951 | 0.93192315  | -2.96580955 | O | 0.19100156  | -1.81441653 | -0.90888674 |
| H | -1.93551972 | -0.38735176 | -2.66538229 | C | -0.71907020 | -2.91706016 | -0.70246026 |
| C | -4.18167813 | 1.04108669  | -0.41962469 | C | -0.80684872 | -3.64069951 | -2.04817912 |
| H | -4.17065660 | 1.31282907  | 0.64126902  | C | 0.58856977  | -3.38569497 | -2.63993449 |
| H | -4.43608577 | 1.93812060  | -0.99270797 | C | 0.87546819  | -1.95657119 | -2.17265944 |
| H | -4.98991091 | 0.31152208  | -0.57988078 | H | 0.47614813  | -1.21229062 | -2.87314971 |
| H | 1.53840405  | 0.07382489  | 5.54005028  | H | 1.93694252  | -1.75040069 | -2.00995620 |
| C | 2.95684610  | 1.66038164  | 5.04913208  | H | 0.62176549  | -3.48305284 | -3.72923391 |
| H | 3.50343271  | 1.10144768  | 4.28302430  | H | 1.31875399  | -4.08338520 | -2.21269363 |
| H | 2.89064828  | 2.69854018  | 4.70111781  | H | -1.57760480 | -3.18132151 | -2.67716584 |
| C | 3.69335124  | 1.59819046  | 6.37012256  | H | -1.04362910 | -4.70320431 | -1.93692255 |
| C | 4.14361296  | 0.36951238  | 6.87756001  | H | -0.30809356 | -3.56439188 | 0.08320894  |
| C | 4.80180062  | 0.29845294  | 8.10483362  | H | -1.67445171 | -2.51048706 | -0.36080749 |
| C | 5.02498297  | 1.45909061  | 8.84951558  | O | 1.87817951  | 0.75396874  | -0.21156450 |
| C | 4.58683344  | 2.68799718  | 8.35583969  | C | 2.95009658  | 0.73915110  | 0.37114889  |
| C | 3.92655764  | 2.75429900  | 7.12691149  | C | 3.69205762  | 1.97613794  | 0.82591759  |
| H | 3.59698025  | 3.71809578  | 6.74469780  | C | 5.06785592  | 2.01439832  | 0.12513321  |
| H | 4.76095710  | 3.59801394  | 8.92400044  | H | 5.67329795  | 2.83320035  | 0.52743217  |
| H | 5.54041576  | 1.40523110  | 9.80458200  | H | 5.62581533  | 1.08160660  | 0.27031747  |
| H | 5.14542149  | -0.66283852 | 8.47790290  | H | 4.95217141  | 2.17892005  | -0.95249625 |
| H | 3.98363041  | -0.53968860 | 6.30125682  | C | 2.88272863  | 3.25772553  | 0.62102882  |
| C | 1.95050765  | -0.89473685 | 2.97969244  | H | 1.91586759  | 3.20413366  | 1.13006951  |
| H | 2.65350108  | -0.78587376 | 3.79733795  | H | 3.43482739  | 4.12128797  | 1.00840308  |
| C | 2.06745185  | -2.14338114 | 2.14982658  | H | 2.68427621  | 3.42778026  | -0.44224279 |
| H | 1.49976547  | -2.05931512 | 1.21896262  | H | 3.87735319  | 1.81914827  | 1.89967083  |
| H | 3.11398536  | -2.35659064 | 1.88692283  | H | 3.46958700  | -0.22146095 | 0.55166058  |
| H | 1.69756431  | -3.03614867 | 2.68094848  |   |             |             |             |

**Table 76.** Geometric coordinates and thermally corrected MP2 energies for IRC derived products leading to (*S,S*)-**6** from LDA **5** mixed dimer with three THF

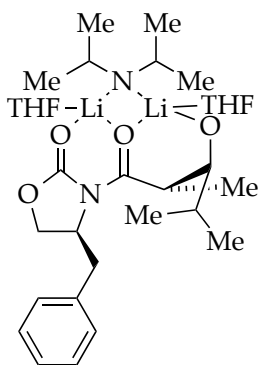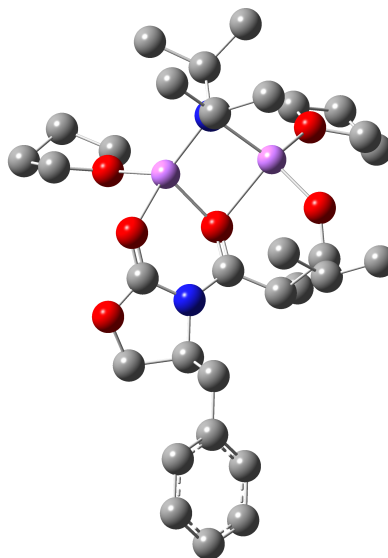

$G = -1787.916425$  Hartree

$G_{\text{MP2}} = -1118232.469$  kcal/mol

$\Delta G_{\text{MP2}} = 5.032631344$  kcal/mol vs. **5** LDA mixed dimer with three THF and isobutyraldehyde

$\Delta G_{\text{MP2}} = -3.442718754$  kcal/mol vs. **5** LDA mixed dimer transition state leading to (*S,S*)-**6**

|      |   |   |   |      |   |   |   |
|------|---|---|---|------|---|---|---|
| Atom | X | Y | Z | Atom | X | Y | Z |
|------|---|---|---|------|---|---|---|

|    |             |             |             |
|----|-------------|-------------|-------------|
| Li | 0.00000000  | 0.00000000  | 0.00000000  |
| O  | 0.00000000  | 0.00000000  | 2.26901720  |
| C  | 1.07426693  | 0.00000000  | 2.87767923  |
| N  | 1.24685024  | 0.91833153  | 3.94810413  |
| C  | 2.21333603  | 0.81267874  | 5.06247810  |
| C  | 1.39420625  | 1.48966935  | 6.17321703  |
| H  | 0.77550864  | 0.77852212  | 6.73084524  |
| H  | 2.00152246  | 2.07246407  | 6.86532429  |
| O  | 0.51960934  | 2.39686988  | 5.46724838  |
| C  | 0.34731588  | 1.95399934  | 4.20115550  |
| O  | -0.46806499 | 2.44799559  | 3.44961533  |
| Li | -1.36325255 | 1.41523569  | 1.95034998  |
| O  | -2.99911471 | 0.95967171  | 3.05719657  |
| C  | -3.84837524 | -0.18230986 | 2.79929277  |
| C  | -5.24866170 | 0.21233565  | 3.28400427  |
| C  | -4.93872745 | 1.25115087  | 4.37412848  |
| C  | -3.73184491 | 1.97465870  | 3.77924122  |
| H  | -3.05624894 | 2.41206619  | 4.51746427  |
| H  | -4.04260504 | 2.75927023  | 3.07633255  |
| H  | -4.66483929 | 0.75562633  | 5.31343414  |
| H  | -5.77450365 | 1.92767354  | 4.57628464  |
| H  | -5.81959384 | -0.64596781 | 3.65067407  |
| H  | -5.81633290 | 0.67608001  | 2.46958896  |
| H  | -3.80885790 | -0.40876763 | 1.72975555  |
| H  | -3.44813996 | -1.03786137 | 3.35778846  |
| N  | -1.33796007 | 1.57828308  | -0.01142516 |
| C  | -0.60291623 | 2.79718846  | -0.38968593 |
| H  | 0.13222269  | 2.93062746  | 0.42362805  |
| C  | 0.26562607  | 2.70654516  | -1.67486581 |
| H  | -0.33731193 | 2.69778066  | -2.58875234 |
| H  | 0.94582122  | 3.56818140  | -1.74182990 |
| H  | 0.88005268  | 1.79869504  | -1.66378564 |
| C  | -1.39740917 | 4.12543669  | -0.42466664 |
| H  | -0.71217503 | 4.98192302  | -0.48890505 |
| H  | -2.06576398 | 4.18343293  | -1.29220318 |
| H  | -2.00588347 | 4.24534300  | 0.47976793  |
| C  | -2.57083552 | 1.21770117  | -0.71932532 |
| H  | -2.79027286 | 0.19087374  | -0.37300892 |
| C  | -2.50112986 | 1.10702040  | -2.26212402 |
| H  | -3.40817190 | 0.62738091  | -2.65790781 |
| H  | -2.42536078 | 2.09083021  | -2.73929961 |
| H  | -1.63560371 | 0.51112566  | -2.57020825 |
| C  | -3.84747119 | 2.02397788  | -0.34647552 |
| H  | -3.93693523 | 2.11311382  | 0.74233811  |
| H  | -3.84060441 | 3.03610768  | -0.76258298 |
| H  | -4.75121359 | 1.52194247  | -0.72395456 |
| H  | 2.39237343  | -0.23929392 | 5.29504387  |
| C  | 3.55229145  | 1.53351112  | 4.78588380  |

|   |             |             |             |
|---|-------------|-------------|-------------|
| H | 3.98452629  | 1.12681073  | 3.86715608  |
| H | 3.34440225  | 2.59250926  | 4.59294601  |
| C | 4.52912900  | 1.38772125  | 5.93459900  |
| C | 5.18025911  | 0.16606150  | 6.16307862  |
| C | 6.06307600  | 0.01436353  | 7.23176017  |
| C | 6.31330160  | 1.08616383  | 8.09183013  |
| C | 5.67851153  | 2.30879086  | 7.87225073  |
| C | 4.79362310  | 2.45616921  | 6.80180086  |
| H | 4.31401437  | 3.41732974  | 6.62856688  |
| H | 5.87444845  | 3.15166325  | 8.52954097  |
| H | 7.00401017  | 0.97002917  | 8.92243346  |
| H | 6.56169522  | -0.93835641 | 7.38878216  |
| H | 5.00521861  | -0.67055571 | 5.48938468  |
| C | 2.17904757  | -0.90740757 | 2.50083889  |
| H | 3.01575428  | -0.84609454 | 3.20215514  |
| C | 1.66910424  | -2.35541738 | 2.40433702  |
| H | 0.96551316  | -2.43651113 | 1.57214441  |
| H | 2.51297978  | -3.02620514 | 2.21096842  |
| H | 1.17014264  | -2.69056053 | 3.32226948  |
| O | -0.68488542 | -1.72014175 | -0.95242026 |
| C | -1.88644969 | -2.50784578 | -0.86266000 |
| C | -1.52289259 | -3.92655652 | -1.35202350 |
| C | 0.01579175  | -3.92624746 | -1.31317934 |
| C | 0.33399445  | -2.47146589 | -1.64519652 |
| H | 0.25470673  | -2.28723862 | -2.72761621 |
| H | 1.28694168  | -2.09194188 | -1.27219699 |
| H | 0.46194013  | -4.63298449 | -2.02003088 |
| H | 0.37983992  | -4.16969886 | -0.30804030 |
| H | -1.87471585 | -4.07809977 | -2.37881433 |
| H | -1.97067833 | -4.70792966 | -0.73009719 |
| H | -2.21049568 | -2.49903476 | 0.18464256  |
| H | -2.67314396 | -2.04638993 | -1.47053518 |
| O | 1.79112568  | -0.36516557 | 0.08117159  |
| C | 2.76071560  | -0.51380077 | 0.97525680  |
| C | 3.79816297  | 0.65332942  | 1.01666435  |
| C | 4.68130069  | 0.56079225  | -0.23883517 |
| H | 5.44175746  | 1.35146961  | -0.25155948 |
| H | 5.19846584  | -0.40541776 | -0.29266421 |
| H | 4.06260923  | 0.66219901  | -1.13675583 |
| C | 3.15747384  | 2.04332148  | 1.09467243  |
| H | 2.55170587  | 2.18246650  | 1.99672054  |
| H | 3.92446613  | 2.82807944  | 1.09038642  |
| H | 2.50236227  | 2.19878981  | 0.23373452  |
| H | 4.45385454  | 0.50021019  | 1.89086447  |
| H | 3.37663750  | -1.43461546 | 0.8141097   |
